# Supplementary material for: The recovery of standing and locomotion after spinal cord injury does not require task-specific training
Source: eLife. 2019 Dec 11;8:e50134. doi: 10.7554/eLife.50134 (PMC6924957; doi:10.7554/eLife.50134)
Supplement: Source data 1. [file elife-50134-data1.xlsx]

## Sheet: Figure 2-source data
Figure 2A
		No perineal stimulation (NPS)					With perineal stimulation (PS)
		W1	W2	W3	W4	W5	W1	W2	W3	W4	W5
Group 1	Cat 1	/	/	/	/	/	/	/	/	/	/
	Cat 2	/	/	/	/	/	/	/	/	/	/
	Cat 3	4	4	4	4	4	4	5	5	4	5
	Cat 4	4	4	4	4	4	5	5	5	4	5
Group 2	Cat 5	0	4	4	4	4	1	5	5	4	5
	Cat 6	0	4	4	4	4	3	4	5	5	4
	Cat 7	0	0	0	0	0	0	0	4	4	4
	Cat 8	0	0	0	3	0	3	3	3	4	4
Group 3	Cat 9	0	4	4	4	4	4	4	4	4	4
	Cat 10	0	4	3	4	4	2	1	1	5	5
	Cat 11	0	4	4	4	4	4	5	4	5	5
	Cat 12	/	/	/	/	/	/	/	/	/	/
Figure 2C
		Soleus muscle (SOL)
		No perineal stimulation (NPS)					With perineal stimulation (PS)
		W1	W2	W3	W4	W5	W1	W2	W3	W4	W5
Group 1	Cat 3	59.9084	75.5186	56.5474	79.3679	67.6646	281.906	305.85	157.354	116.267	121.561
	Cat 4	50.0286	87.9227	94.5645	70.9079	124.577	109.15	109.155	174.849	125.625	158.147
Group 2	Cat 5	64.85	206.432	113.541	117.432	99.4979	115.647	456.437	161.975	189.05	241.671
	Cat 6	9.29365	89.3519	86.0575	83.923	71.2524	35.0117	120.065	86.1638	95.5036	103.886
	Cat 7	15.523	18.8643	198.324	176.663	114.07	23.6872	170.177	263.206	226.047	294.876
	Cat 8	60.5121	7.37833	13.2212	11.2763	24.334	110.27	55.1697	18.0208	30.9731	27.6049
Group 3	Cat 9	84.8607	76.6088	35.134	18.955	23.02	98.9738	109.363	82.5017	47.3907	30.5662
	Cat 10	47.1375	51.3713	66.2016	47.3331	82.6186	31.0398	159.041	201.301	72.2666	128.326
	Cat 11	22.6018	30.5496	21.692	9.07854	29.0943	108.116	52.4596	44.1199	42.7865	55.0987
		Tibialis anterior muscle (TA)
		No perineal stimulation (NPS)					With perineal stimulation (PS)
		W1	W2	W3	W4	W5	W1	W2	W3	W4	W5
Group 1	Cat 3	4.39255	28.571	12.4553	41.6947	31.6431	44.0743	17.0968	23.9584	23.4271	25.3523
	Cat 4	4.12405	5.36819	16.4611	16.569	15.5916	15.5644	18.4094	14.3914	16.9721	17.2442
Group 2	Cat 5	8.15058	7.98641	15.9433	22.9747	16.3145	16.2833	4.31911	9.33961	4.26801	12.3504
	Cat 6	9.85882	11.3004	4.95492	6.95318	4.4566	4.68389	4.13693	4.53864	3.83074	4.50576
	Cat 7	4.49417	6.50066	9.45872	11.6251	18.4132	21.0125	17.3066	18.8985	16.479	18.9169
	Cat 8	5.93629	12.3577	4.06267	3.80933	4.06267	3.80933	4.99064	4.5287	3.83195	3.99055
Group 3	Cat 9	4.39073	6.20673	9.20568	12.2104	4.90737	10.8713	3.32805	5.81215	3.75272	7.28876
	Cat 10	4.22847	8.87314	4.84989	5.93845	5.45695	6.43496	3.81811	4.55991	8.27226	8.36004
	Cat 11	7.98421	5.59052	8.63079	9.08081	8.17213	8.94945	16.2842	16.4268	16.1008	16.428
Figure 2B
Cat 7				Cat 6				Cat 10
RSOL	RTA	LSOL	LTA	RSOL	RTA	LSOL	LTA	RSOL	RTA	LSOL	LTA
6.34766e-06	2.14844e-05	1.5625e-05	7.8125e-06	3.125e-05	7.32422e-06	4.78516e-05	8.30078e-06	8.10547e-05	1.5625e-05	4.88281e-06	3.90625e-05
7.8125e-06	1.5625e-05	1.75781e-05	6.83594e-06	3.61328e-05	4.63867e-06	4.10156e-05	9.76563e-06	-2.53906e-05	1.85547e-05	-5.85938e-06	4.15039e-05
1.07422e-05	1.46484e-05	1.85547e-05	6.34766e-06	9.08203e-05	2.92969e-06	3.51562e-05	9.76563e-06	-0.000100586	2.05078e-05	3.125e-05	4.15039e-05
1.17188e-05	1.75781e-05	1.95313e-05	6.34766e-06	0.000132813	1.95313e-06	3.32031e-05	8.30078e-06	-6.93359e-05	2.14844e-05	4.88281e-05	4.15039e-05
1.2207e-05	1.85547e-05	1.95313e-05	6.34766e-06	8.59375e-05	9.76563e-07	5.56641e-05	7.32422e-06	-4.98047e-05	1.95313e-05	4.49219e-05	4.39453e-05
1.17188e-05	1.66016e-05	2.24609e-05	7.32422e-06	4.88281e-06	2.44141e-07	8.69141e-05	2.92969e-06	-4.10156e-05	1.66016e-05	2.34375e-05	4.39453e-05
1.46484e-05	1.66016e-05	2.05078e-05	6.83594e-06	-8.49609e-05	7.32422e-07	7.12891e-05	4.39453e-06	-2.53906e-05	1.85547e-05	-1.07422e-05	4.39453e-05
1.31836e-05	1.5625e-05	1.75781e-05	4.88281e-06	-0.000100586	-7.32422e-07	-2.34375e-05	6.34766e-06	-1.26953e-05	1.5625e-05	0.000105469	3.90625e-05
1.26953e-05	1.75781e-05	1.36719e-05	6.34766e-06	-4.49219e-05	0	-8.59375e-05	5.85938e-06	2.92969e-06	2.05078e-05	0.000174805	3.66211e-05
1.36719e-05	1.85547e-05	1.5625e-05	6.34766e-06	-1.46484e-05	-2.44141e-07	-2.24609e-05	6.83594e-06	2.53906e-05	1.66016e-05	0.000271484	2.92969e-05
9.76563e-07	9.76563e-07	0	-6.34766e-06	0	-5.12695e-06	6.44531e-05	4.88281e-07	2.44141e-05	9.76563e-07	0.000135742	1.46484e-05
1.9043e-05	1.95313e-05	3.41797e-05	1.2207e-05	2.53906e-05	6.5918e-06	0.000143555	1.2207e-05	2.34375e-05	1.95313e-05	-5.56641e-05	4.15039e-05
1.75781e-05	1.75781e-05	3.02734e-05	8.78906e-06	2.63672e-05	7.32422e-06	0.000183594	1.07422e-05	1.26953e-05	2.14844e-05	0.000248047	4.63867e-05
1.75781e-05	2.05078e-05	2.63672e-05	8.30078e-06	2.34375e-05	5.61523e-06	0.000146484	6.83594e-06	1.46484e-05	1.85547e-05	0.000524414	3.66211e-05
1.85547e-05	1.95313e-05	2.34375e-05	8.30078e-06	7.8125e-06	3.90625e-06	-8.88672e-05	7.8125e-06	2.14844e-05	2.05078e-05	0.000270508	4.15039e-05
1.66016e-05	1.66016e-05	2.24609e-05	5.37109e-06	0.000143555	3.17383e-06	-0.000349609	9.76563e-06	2.44141e-05	1.85547e-05	-6.93359e-05	4.88281e-05
1.5625e-05	1.75781e-05	2.14844e-05	6.34766e-06	0.000131836	1.95313e-06	-0.000220703	1.07422e-05	4.19922e-05	1.95313e-05	-0.000397461	4.88281e-05
1.46484e-05	1.75781e-05	2.05078e-05	7.32422e-06	-0.000245117	9.76563e-07	9.47266e-05	1.2207e-05	0.000115234	1.5625e-05	-0.000483398	4.39453e-05
1.5625e-05	1.5625e-05	2.05078e-05	8.30078e-06	-0.000161133	1.70898e-06	0.000188477	1.17188e-05	0.000107422	1.46484e-05	-0.000467773	4.63867e-05
1.36719e-05	1.36719e-05	1.95313e-05	6.83594e-06	4.19922e-05	2.44141e-06	0.000171875	6.34766e-06	0.000112305	1.5625e-05	-0.000462891	4.39453e-05
1.51367e-05	1.46484e-05	1.85547e-05	6.83594e-06	2.14844e-05	2.68555e-06	0.000175781	6.34766e-06	0.000244141	1.95313e-05	-0.000239258	4.39453e-05
1.36719e-05	1.5625e-05	1.85547e-05	6.83594e-06	-5.56641e-05	1.95313e-06	6.05469e-05	8.30078e-06	0.000307617	1.85547e-05	8.98437e-05	4.63867e-05
1.41602e-05	1.66016e-05	1.95313e-05	8.30078e-06	-2.44141e-05	1.95313e-06	-7.8125e-06	1.2207e-05	6.83594e-05	1.5625e-05	0.000133789	4.63867e-05
1.46484e-05	1.46484e-05	1.95313e-05	8.30078e-06	4.88281e-06	5.12695e-06	0	1.02539e-05	-0.000291016	1.36719e-05	0.000229492	4.88281e-05
1.41602e-05	1.66016e-05	2.05078e-05	8.30078e-06	3.61328e-05	3.66211e-06	1.66016e-05	9.76563e-06	-0.000292969	1.95313e-05	0.000239258	4.88281e-05
1.46484e-05	1.46484e-05	1.85547e-05	6.83594e-06	8.69141e-05	4.88281e-06	-8.49609e-05	5.37109e-06	-0.000267578	1.85547e-05	0.0001875	3.90625e-05
1.26953e-05	1.46484e-05	1.75781e-05	7.32422e-06	0.000162109	4.88281e-06	-3.90625e-05	6.83594e-06	-0.000483398	1.85547e-05	0.000144531	4.39453e-05
1.31836e-05	1.5625e-05	1.95313e-05	8.30078e-06	9.57031e-05	6.5918e-06	-4.00391e-05	5.37109e-06	-0.000400391	1.5625e-05	4.88281e-05	4.15039e-05
1.41602e-05	1.46484e-05	1.95313e-05	1.02539e-05	3.90625e-06	6.5918e-06	-2.44141e-05	6.83594e-06	-4.58984e-05	2.05078e-05	-0.000107422	3.90625e-05
1.36719e-05	1.5625e-05	2.05078e-05	8.78906e-06	1.46484e-05	7.32422e-06	-2.83203e-05	7.32422e-06	0.000188477	1.75781e-05	-0.000125	3.66211e-05
1.2207e-05	1.46484e-05	2.24609e-05	8.78906e-06	8.10547e-05	6.34766e-06	1.46484e-05	9.76563e-06	0.0004375	1.5625e-05	-4.19922e-05	4.39453e-05
1.12305e-05	1.66016e-05	2.34375e-05	9.27734e-06	3.41797e-05	6.34766e-06	4.98047e-05	1.02539e-05	0.000391602	1.46484e-05	4.00391e-05	4.39453e-05
1.12305e-05	1.75781e-05	2.05078e-05	9.76563e-06	-2.83203e-05	4.88281e-06	5.37109e-05	1.07422e-05	0.000196289	2.34375e-05	-7.51953e-05	4.88281e-05
1.26953e-05	1.66016e-05	1.75781e-05	9.76563e-06	-2.53906e-05	4.15039e-06	2.05078e-05	8.78906e-06	0.000161133	2.05078e-05	-0.000112305	4.63867e-05
1.31836e-05	1.5625e-05	1.85547e-05	8.78906e-06	-1.07422e-05	3.90625e-06	-3.125e-05	5.85938e-06	2.63672e-05	1.75781e-05	-0.000124023	4.88281e-05
1.2207e-05	1.66016e-05	1.75781e-05	9.76563e-06	9.76563e-07	4.39453e-06	-3.61328e-05	6.83594e-06	-3.41797e-05	1.26953e-05	-0.000151367	4.88281e-05
1.02539e-05	1.66016e-05	1.66016e-05	8.30078e-06	1.66016e-05	1.95313e-06	-7.8125e-06	8.30078e-06	-8.39844e-05	1.46484e-05	-0.000149414	4.88281e-05
1.02539e-05	1.5625e-05	1.66016e-05	7.8125e-06	-1.66016e-05	7.32422e-07	-4.88281e-06	8.78906e-06	-7.71484e-05	1.5625e-05	-0.000139648	4.63867e-05
1.12305e-05	1.66016e-05	1.66016e-05	8.78906e-06	-8.49609e-05	0	6.83594e-06	8.78906e-06	9.76563e-06	1.5625e-05	-9.27734e-05	5.12695e-05
1.17188e-05	1.36719e-05	1.85547e-05	9.27734e-06	-7.91016e-05	7.32422e-07	4.98047e-05	7.8125e-06	0.000125	1.26953e-05	-2.05078e-05	4.39453e-05
9.76563e-06	1.36719e-05	1.5625e-05	8.30078e-06	-5.85938e-06	3.90625e-06	3.41797e-05	1.17188e-05	0.000229492	1.5625e-05	-2.92969e-06	3.90625e-05
8.30078e-06	1.46484e-05	1.75781e-05	7.8125e-06	5.17578e-05	4.39453e-06	-0.000132813	1.26953e-05	0.000177734	1.07422e-05	-3.125e-05	3.17383e-05
9.27734e-06	1.46484e-05	1.75781e-05	9.27734e-06	7.71484e-05	7.32422e-06	-0.000121094	1.26953e-05	-8.69141e-05	1.26953e-05	2.14844e-05	3.90625e-05
9.76563e-06	1.46484e-05	1.75781e-05	7.8125e-06	0.000105469	6.34766e-06	2.73438e-05	1.02539e-05	-0.000290039	1.46484e-05	0.000141602	3.90625e-05
1.12305e-05	1.75781e-05	1.85547e-05	8.30078e-06	0.000163086	5.12695e-06	0.000125	1.07422e-05	-0.000116211	1.95313e-05	0.000113281	4.15039e-05
9.27734e-06	1.75781e-05	1.85547e-05	6.83594e-06	0.000135742	5.12695e-06	0.000117187	8.30078e-06	-0.000150391	1.95313e-05	-6.73828e-05	4.15039e-05
9.76563e-06	1.66016e-05	1.85547e-05	9.27734e-06	7.71484e-05	6.34766e-06	2.14844e-05	7.8125e-06	-0.000307617	2.14844e-05	0.000119141	4.39453e-05
9.76563e-06	1.66016e-05	1.5625e-05	7.32422e-06	8.00781e-05	6.34766e-06	1.07422e-05	6.34766e-06	-0.000175781	2.14844e-05	0.000334961	3.66211e-05
6.83594e-06	1.75781e-05	1.26953e-05	1.02539e-05	0.000163086	7.32422e-06	5.37109e-05	6.83594e-06	6.73828e-05	2.44141e-05	0.000115234	4.15039e-05
5.85938e-06	2.05078e-05	1.36719e-05	1.2207e-05	7.61719e-05	3.90625e-06	0.000108398	6.83594e-06	0.00015918	2.14844e-05	1.17188e-05	4.39453e-05
7.32422e-06	1.75781e-05	1.5625e-05	8.78906e-06	-8.49609e-05	1.95313e-06	3.51562e-05	5.85938e-06	0.000283203	2.24609e-05	-3.41797e-05	4.15039e-05
7.8125e-06	1.26953e-05	1.85547e-05	7.8125e-06	-9.96094e-05	4.88281e-07	2.53906e-05	4.39453e-06	0.000222656	2.05078e-05	8.98437e-05	3.90625e-05
1.02539e-05	1.07422e-05	1.75781e-05	7.32422e-06	-7.12891e-05	2.44141e-06	-6.05469e-05	4.88281e-06	0.000211914	1.66016e-05	1.36719e-05	4.15039e-05
8.78906e-06	1.26953e-05	1.75781e-05	6.83594e-06	-0.000107422	1.46484e-06	-0.000158203	7.32422e-06	0.000131836	1.5625e-05	-4.78516e-05	3.66211e-05
9.27734e-06	1.75781e-05	1.5625e-05	7.32422e-06	-0.000212891	1.2207e-06	-0.000105469	9.27734e-06	7.61719e-05	1.5625e-05	-7.51953e-05	4.15039e-05
8.30078e-06	2.14844e-05	1.66016e-05	7.8125e-06	-8.88672e-05	1.70898e-06	-7.8125e-06	9.27734e-06	0.000232422	1.46484e-05	-5.46875e-05	3.66211e-05
6.83594e-06	1.75781e-05	1.75781e-05	8.30078e-06	0.000115234	1.2207e-06	1.5625e-05	8.78906e-06	0.000171875	1.5625e-05	1.85547e-05	3.90625e-05
7.8125e-06	1.26953e-05	1.46484e-05	8.78906e-06	4.49219e-05	1.95313e-06	-1.26953e-05	8.78906e-06	4.98047e-05	1.17188e-05	0.000102539	3.41797e-05
1.02539e-05	1.75781e-05	1.66016e-05	8.30078e-06	-3.02734e-05	9.76563e-07	2.92969e-05	5.85938e-06	1.95313e-05	1.66016e-05	0.000151367	3.90625e-05
7.8125e-06	1.85547e-05	1.5625e-05	7.8125e-06	-2.14844e-05	1.46484e-06	3.02734e-05	6.34766e-06	-5.85938e-06	1.5625e-05	0.000174805	3.66211e-05
5.37109e-06	1.66016e-05	1.46484e-05	8.78906e-06	3.90625e-06	1.70898e-06	5.95703e-05	9.76563e-06	-1.75781e-05	2.05078e-05	0.000164063	3.90625e-05
6.83594e-06	1.46484e-05	1.5625e-05	8.78906e-06	3.02734e-05	3.41797e-06	7.22656e-05	1.12305e-05	-7.8125e-06	1.95313e-05	9.96094e-05	3.66211e-05
6.34766e-06	9.76563e-06	1.5625e-05	9.27734e-06	4.88281e-05	5.12695e-06	7.32422e-05	1.36719e-05	-1.85547e-05	1.66016e-05	6.44531e-05	3.90625e-05
8.30078e-06	6.83594e-06	1.46484e-05	8.78906e-06	4.88281e-05	2.92969e-06	4.58984e-05	9.27734e-06	-0.000113281	1.66016e-05	6.44531e-05	3.41797e-05
8.78906e-06	1.17188e-05	1.66016e-05	8.78906e-06	5.46875e-05	3.90625e-06	4.88281e-05	9.76563e-06	-0.000144531	1.75781e-05	0.000104492	3.41797e-05
7.32422e-06	1.75781e-05	1.66016e-05	7.8125e-06	5.95703e-05	6.10352e-06	3.90625e-05	7.32422e-06	-0.000100586	1.75781e-05	0.000111328	3.17383e-05
6.83594e-06	1.75781e-05	1.36719e-05	8.78906e-06	5.95703e-05	5.85938e-06	3.02734e-05	6.83594e-06	-2.34375e-05	1.95313e-05	9.86328e-05	3.41797e-05
4.39453e-06	1.95313e-05	1.46484e-05	7.8125e-06	3.51562e-05	4.15039e-06	3.71094e-05	7.8125e-06	5.07812e-05	1.66016e-05	4.88281e-05	3.66211e-05
4.88281e-06	1.85547e-05	1.46484e-05	7.8125e-06	2.05078e-05	5.37109e-06	3.71094e-05	9.76563e-06	0.000128906	1.95313e-05	2.24609e-05	3.90625e-05
8.78906e-06	1.75781e-05	1.66016e-05	7.32422e-06	2.92969e-05	3.90625e-06	2.73438e-05	6.83594e-06	0.000132813	1.66016e-05	2.92969e-06	3.90625e-05
8.78906e-06	1.75781e-05	1.66016e-05	8.78906e-06	1.95313e-05	3.90625e-06	2.05078e-05	7.32422e-06	9.57031e-05	1.75781e-05	-5.85938e-06	4.15039e-05
7.8125e-06	1.75781e-05	1.5625e-05	1.02539e-05	8.78906e-05	3.90625e-06	2.34375e-05	5.85938e-06	0.000103516	1.66016e-05	-1.17188e-05	4.15039e-05
6.34766e-06	1.66016e-05	1.46484e-05	6.83594e-06	7.51953e-05	1.70898e-06	4.10156e-05	8.78906e-06	0.00015625	1.5625e-05	-1.85547e-05	4.15039e-05
6.34766e-06	1.46484e-05	1.75781e-05	9.76563e-06	3.90625e-06	9.76563e-07	2.44141e-05	8.78906e-06	0.000226563	1.36719e-05	-4.19922e-05	3.66211e-05
6.34766e-06	1.36719e-05	1.66016e-05	1.02539e-05	-6.44531e-05	-1.46484e-06	9.76563e-06	1.02539e-05	8.00781e-05	1.5625e-05	-4.88281e-05	3.90625e-05
6.34766e-06	1.36719e-05	1.36719e-05	8.30078e-06	-2.34375e-05	-2.44141e-06	2.73438e-05	6.83594e-06	-5.85938e-06	1.26953e-05	-3.90625e-05	4.15039e-05
9.27734e-06	1.26953e-05	1.46484e-05	8.78906e-06	0.000363281	7.32422e-07	5.66406e-05	6.83594e-06	-3.71094e-05	1.66016e-05	-2.34375e-05	4.15039e-05
7.32422e-06	1.5625e-05	1.36719e-05	9.76563e-06	0.000430664	1.2207e-06	2.05078e-05	8.78906e-06	-4.98047e-05	1.36719e-05	-5.85938e-06	4.15039e-05
8.78906e-06	1.66016e-05	1.5625e-05	8.30078e-06	-1.26953e-05	1.46484e-06	-7.51953e-05	8.30078e-06	-0.000137695	1.66016e-05	1.26953e-05	5.37109e-05
7.8125e-06	1.46484e-05	1.66016e-05	8.78906e-06	-0.00034082	2.68555e-06	-3.41797e-05	1.07422e-05	-0.000172852	1.66016e-05	1.46484e-05	5.12695e-05
9.76563e-06	1.5625e-05	1.17188e-05	8.78906e-06	-0.000337891	2.68555e-06	2.05078e-05	8.30078e-06	-0.000180664	1.75781e-05	1.46484e-05	4.88281e-05
7.8125e-06	1.5625e-05	1.07422e-05	8.30078e-06	-0.000239258	2.68555e-06	4.29687e-05	7.8125e-06	-0.000162109	1.5625e-05	9.76563e-06	4.39453e-05
5.85938e-06	1.66016e-05	1.07422e-05	8.30078e-06	-0.000225586	3.41797e-06	4.78516e-05	6.34766e-06	-9.47266e-05	1.66016e-05	-9.76563e-07	4.39453e-05
5.85938e-06	1.75781e-05	1.5625e-05	9.76563e-06	-0.000155273	3.66211e-06	5.17578e-05	6.83594e-06	-8.78906e-06	1.36719e-05	-1.36719e-05	3.66211e-05
6.34766e-06	1.66016e-05	1.95313e-05	9.27734e-06	-1.46484e-05	7.08008e-06	4.39453e-05	6.83594e-06	6.25e-05	1.5625e-05	4.88281e-06	3.90625e-05
6.34766e-06	1.26953e-05	2.05078e-05	9.27734e-06	8.10547e-05	1.09863e-05	4.10156e-05	1.07422e-05	8.20313e-05	1.26953e-05	1.17188e-05	3.17383e-05
7.32422e-06	1.75781e-05	1.75781e-05	8.78906e-06	0.000145508	1.07422e-05	8.98437e-05	1.07422e-05	8.30078e-05	1.5625e-05	2.14844e-05	3.90625e-05
8.30078e-06	1.5625e-05	1.75781e-05	7.8125e-06	0.000125	7.56836e-06	0.000118164	9.27734e-06	7.32422e-05	1.46484e-05	2.53906e-05	3.90625e-05
1.26953e-05	1.75781e-05	1.75781e-05	9.76563e-06	0.000164063	5.37109e-06	0.000139648	9.76563e-06	5.76172e-05	1.46484e-05	5.76172e-05	4.15039e-05
1.26953e-05	1.95313e-05	1.66016e-05	9.27734e-06	0.000295898	7.32422e-06	4.88281e-05	5.85938e-06	4.10156e-05	1.46484e-05	7.32422e-05	3.90625e-05
9.27734e-06	1.85547e-05	1.75781e-05	9.76563e-06	0.000193359	4.63867e-06	-0.000251953	3.41797e-06	2.73438e-05	1.5625e-05	6.25e-05	4.63867e-05
4.88281e-06	1.66016e-05	1.46484e-05	1.02539e-05	4.88281e-06	-7.32422e-07	-0.000321289	3.41797e-06	1.5625e-05	1.46484e-05	2.73438e-05	4.39453e-05
9.76563e-07	1.66016e-05	1.5625e-05	9.27734e-06	-7.12891e-05	-2.19727e-06	-0.000123047	2.44141e-06	1.5625e-05	1.66016e-05	9.76563e-06	4.63867e-05
-2.44141e-06	1.66016e-05	1.36719e-05	9.27734e-06	-7.91016e-05	1.70898e-06	-8.78906e-06	4.39453e-06	8.78906e-06	1.5625e-05	6.83594e-05	4.15039e-05
-1.95313e-06	1.85547e-05	1.36719e-05	5.85938e-06	-4.78516e-05	1.46484e-06	-1.95313e-06	6.34766e-06	3.90625e-05	1.66016e-05	3.22266e-05	4.15039e-05
5.37109e-06	1.5625e-05	1.46484e-05	9.76563e-06	-2.24609e-05	2.68555e-06	7.03125e-05	4.88281e-06	-1.95313e-05	1.46484e-05	3.02734e-05	3.66211e-05
1.26953e-05	1.85547e-05	1.75781e-05	8.78906e-06	-6.25e-05	1.2207e-06	0.000185547	6.83594e-06	-7.91016e-05	1.66016e-05	6.05469e-05	4.15039e-05
1.95313e-05	1.46484e-05	1.5625e-05	1.07422e-05	-6.73828e-05	2.19727e-06	0.000160156	9.27734e-06	-0.000113281	1.5625e-05	-3.22266e-05	4.15039e-05
2.29492e-05	1.36719e-05	1.66016e-05	9.27734e-06	-4.19922e-05	3.66211e-06	9.27734e-05	1.36719e-05	-6.34766e-05	1.85547e-05	-0.000154297	4.39453e-05
1.36719e-05	1.5625e-05	1.75781e-05	6.83594e-06	1.17188e-05	4.15039e-06	3.02734e-05	1.61133e-05	-1.85547e-05	1.75781e-05	-8.59375e-05	3.90625e-05
0	1.75781e-05	1.26953e-05	6.83594e-06	4.6875e-05	4.15039e-06	-1.95313e-05	1.5625e-05	7.42187e-05	1.85547e-05	2.24609e-05	4.15039e-05
-2.24609e-05	2.24609e-05	1.26953e-05	7.8125e-06	-2.05078e-05	2.92969e-06	-4.29687e-05	1.85547e-05	0.000168945	1.46484e-05	3.71094e-05	3.90625e-05
-2.49023e-05	2.24609e-05	1.46484e-05	7.8125e-06	-0.000130859	5.61523e-06	-2.92969e-06	1.5625e-05	0.000102539	1.75781e-05	-2.34375e-05	4.63867e-05
-5.37109e-06	2.34375e-05	1.36719e-05	8.78906e-06	-0.00015625	2.44141e-06	5.27344e-05	1.17188e-05	-9.57031e-05	1.75781e-05	-7.8125e-06	4.39453e-05
3.32031e-05	1.85547e-05	1.95313e-05	7.32422e-06	-0.000143555	1.46484e-06	4.19922e-05	6.83594e-06	-0.000180664	1.95313e-05	7.8125e-05	4.88281e-05
5.9082e-05	1.85547e-05	2.73438e-05	7.32422e-06	0.000130859	4.88281e-07	-1.95313e-05	3.41797e-06	-0.000139648	1.66016e-05	0.000205078	3.90625e-05
3.4668e-05	1.85547e-05	2.14844e-05	9.27734e-06	0.000212891	3.90625e-06	-7.12891e-05	4.88281e-07	-0.000147461	1.95313e-05	0.000120117	3.66211e-05
2.00195e-05	1.46484e-05	1.66016e-05	7.8125e-06	0.000113281	3.66211e-06	-8.69141e-05	-2.44141e-06	-0.000100586	1.85547e-05	-4.78516e-05	3.17383e-05
2.53906e-05	1.46484e-05	1.5625e-05	8.30078e-06	2.92969e-06	4.15039e-06	-6.93359e-05	-2.44141e-06	2.34375e-05	1.75781e-05	-0.000204102	3.90625e-05
-6.83594e-06	1.66016e-05	1.66016e-05	8.30078e-06	-2.92969e-05	4.39453e-06	-0.000119141	1.46484e-06	0.000160156	1.66016e-05	0.000113281	3.66211e-05
-4.44336e-05	1.07422e-05	1.66016e-05	7.8125e-06	-6.83594e-06	4.63867e-06	-2.83203e-05	1.95313e-06	0.000239258	1.85547e-05	-1.66016e-05	3.90625e-05
-5.37109e-05	1.36719e-05	1.75781e-05	8.30078e-06	1.5625e-05	6.34766e-06	0.000195313	2.44141e-06	0.000262695	1.75781e-05	1.26953e-05	3.90625e-05
-4.05273e-05	1.66016e-05	1.85547e-05	9.27734e-06	6.64063e-05	8.54492e-06	0.000265625	6.34766e-06	0.000166992	1.95313e-05	9.96094e-05	4.15039e-05
-2.14844e-05	1.85547e-05	1.46484e-05	8.30078e-06	7.22656e-05	8.30078e-06	0.000213867	1.02539e-05	0.000133789	1.75781e-05	1.75781e-05	3.90625e-05
-7.8125e-06	1.66016e-05	1.46484e-05	7.8125e-06	4.88281e-05	5.37109e-06	0.000324219	1.51367e-05	0.000149414	1.75781e-05	5.46875e-05	4.63867e-05
2.39258e-05	1.66016e-05	1.26953e-05	6.34766e-06	5.46875e-05	3.90625e-06	7.61719e-05	1.46484e-05	5.85937e-05	1.46484e-05	5.85937e-05	4.39453e-05
4.10156e-05	1.66016e-05	8.78906e-06	8.30078e-06	7.12891e-05	3.17383e-06	-0.000200195	1.51367e-05	5.85937e-05	1.85547e-05	0.000155273	4.39453e-05
8.30078e-06	1.5625e-05	8.78906e-06	8.30078e-06	8.20313e-05	3.41797e-06	-0.000262695	1.41602e-05	4.88281e-05	1.66016e-05	0.000244141	4.39453e-05
-8.30078e-06	1.66016e-05	1.36719e-05	7.8125e-06	8.20313e-05	7.32422e-07	-0.000173828	1.46484e-05	3.90625e-06	1.95313e-05	2.92969e-06	4.39453e-05
-4.88281e-06	1.66016e-05	2.05078e-05	6.83594e-06	8.10547e-05	1.2207e-06	-6.54297e-05	1.36719e-05	-0.000192383	1.75781e-05	-0.000325195	4.39453e-05
2.53906e-05	1.5625e-05	2.24609e-05	6.83594e-06	5.46875e-05	4.88281e-07	-1.36719e-05	1.02539e-05	-0.000373047	1.75781e-05	-0.000286133	4.63867e-05
5.61523e-05	1.46484e-05	2.34375e-05	7.8125e-06	-2.63672e-05	1.46484e-06	-0.000138672	1.17188e-05	-0.00031543	1.36719e-05	-9.17969e-05	3.90625e-05
4.29687e-05	1.66016e-05	1.95313e-05	7.8125e-06	0.000126953	4.88281e-07	-7.51953e-05	1.02539e-05	3.02734e-05	1.5625e-05	1.66016e-05	3.90625e-05
8.78906e-06	1.66016e-05	1.85547e-05	9.76563e-06	0.000319336	2.92969e-06	0.0001875	6.83594e-06	7.12891e-05	1.36719e-05	7.12891e-05	3.41797e-05
-2.05078e-05	1.66016e-05	1.85547e-05	9.27734e-06	0.00012793	2.44141e-06	0.000357422	2.92969e-06	-5.85937e-05	1.75781e-05	6.83594e-05	3.66211e-05
-5.85938e-06	1.75781e-05	1.46484e-05	9.27734e-06	8.88672e-05	2.92969e-06	0.000330078	1.95313e-06	8.00781e-05	1.75781e-05	0.000101562	3.41797e-05
2.68555e-05	1.5625e-05	1.17188e-05	7.32422e-06	2.14844e-05	6.5918e-06	9.96094e-05	3.90625e-06	0.00021875	2.14844e-05	0.000162109	3.90625e-05
3.4668e-05	1.17188e-05	1.46484e-05	9.27734e-06	-4.98047e-05	4.63867e-06	-0.00019043	3.90625e-06	0.000198242	2.05078e-05	-1.66016e-05	4.15039e-05
3.17383e-05	1.26953e-05	1.46484e-05	8.30078e-06	-0.000172852	2.19727e-06	-0.000166016	5.85938e-06	0.00015625	1.75781e-05	-0.000161133	5.85937e-05
3.27148e-05	1.46484e-05	1.5625e-05	8.30078e-06	-0.000138672	2.92969e-06	-0.000106445	8.78906e-06	0.000166992	1.85547e-05	-0.000162109	5.61523e-05
1.02539e-05	1.36719e-05	1.5625e-05	7.8125e-06	-7.03125e-05	4.15039e-06	-8.10547e-05	1.02539e-05	0.000121094	2.05078e-05	-9.76563e-05	5.12695e-05
-9.76563e-07	1.26953e-05	1.5625e-05	9.27734e-06	-5.37109e-05	3.90625e-06	3.90625e-06	9.76563e-06	0.000109375	1.75781e-05	2.92969e-05	4.39453e-05
2.88086e-05	1.17188e-05	1.66016e-05	9.76563e-06	5.85938e-06	5.12695e-06	7.71484e-05	8.78906e-06	1.5625e-05	1.75781e-05	5.76172e-05	4.88281e-05
1.46484e-05	1.26953e-05	1.66016e-05	8.78906e-06	5.56641e-05	5.37109e-06	6.25e-05	9.76563e-06	-0.000123047	1.66016e-05	6.83594e-06	4.63867e-05
-2.88086e-05	1.5625e-05	1.5625e-05	8.78906e-06	7.61719e-05	6.83594e-06	-4.49219e-05	1.02539e-05	-0.000181641	1.36719e-05	-2.44141e-05	3.66211e-05
-3.95508e-05	1.5625e-05	1.66016e-05	8.30078e-06	8.88672e-05	5.61523e-06	-0.000193359	9.27734e-06	-0.000101562	1.75781e-05	-1.46484e-05	3.66211e-05
1.46484e-06	1.5625e-05	1.5625e-05	7.32422e-06	8.49609e-05	5.61523e-06	-9.96094e-05	9.76563e-06	6.54297e-05	1.95313e-05	-2.34375e-05	4.15039e-05
1.80664e-05	1.66016e-05	1.5625e-05	9.76563e-06	5.76172e-05	4.15039e-06	6.44531e-05	1.2207e-05	0.000119141	1.85547e-05	-2.63672e-05	4.39453e-05
6.83594e-06	1.75781e-05	1.75781e-05	7.32422e-06	4.39453e-05	5.12695e-06	8.78906e-05	1.26953e-05	0.000131836	2.05078e-05	9.76563e-06	4.63867e-05
9.76563e-06	1.75781e-05	1.66016e-05	8.78906e-06	2.24609e-05	5.37109e-06	9.66797e-05	1.02539e-05	0.000133789	1.46484e-05	2.14844e-05	4.15039e-05
2.73438e-05	1.85547e-05	1.66016e-05	1.02539e-05	3.90625e-06	4.63867e-06	5.07812e-05	1.07422e-05	0.000216797	1.5625e-05	3.90625e-06	4.39453e-05
3.80859e-05	1.5625e-05	1.85547e-05	1.02539e-05	-9.08203e-05	2.68555e-06	3.02734e-05	1.02539e-05	0.000188477	1.66016e-05	1.5625e-05	3.41797e-05
3.75977e-05	1.75781e-05	1.46484e-05	7.8125e-06	0.000104492	7.32422e-07	2.53906e-05	1.31836e-05	0.000213867	1.75781e-05	1.95313e-05	3.41797e-05
4.00391e-05	1.46484e-05	1.07422e-05	7.8125e-06	0.000208008	4.88281e-07	1.85547e-05	1.12305e-05	-9.96094e-05	1.5625e-05	-9.76563e-07	3.66211e-05
3.90625e-05	1.36719e-05	8.78906e-06	1.02539e-05	8.49609e-05	-7.32422e-07	2.92969e-06	1.02539e-05	-0.000413086	1.85547e-05	1.66016e-05	4.88281e-05
3.17383e-05	1.5625e-05	5.85938e-06	1.02539e-05	-6.83594e-05	2.44141e-07	-1.26953e-05	1.07422e-05	-0.000402344	1.85547e-05	1.07422e-05	4.88281e-05
2.83203e-05	1.66016e-05	4.88281e-06	1.2207e-05	-0.000155273	2.19727e-06	-1.26953e-05	9.27734e-06	-0.000177734	1.85547e-05	3.32031e-05	4.39453e-05
1.5625e-05	1.95313e-05	1.07422e-05	1.31836e-05	-5.85937e-05	1.46484e-06	-9.76563e-06	5.85938e-06	-4.78516e-05	1.66016e-05	0.000231445	3.90625e-05
1.12305e-05	1.75781e-05	1.85547e-05	1.17188e-05	3.51562e-05	2.44141e-06	-9.76563e-07	7.32422e-06	0.000106445	1.66016e-05	0.000125	4.15039e-05
9.27734e-06	1.75781e-05	2.83203e-05	7.8125e-06	2.44141e-05	1.46484e-06	1.95313e-06	6.83594e-06	0.00015332	1.75781e-05	-8.98437e-05	3.90625e-05
-4.88281e-06	1.95313e-05	3.51562e-05	9.76563e-07	-6.15234e-05	2.68555e-06	1.36719e-05	6.83594e-06	0.000178711	2.05078e-05	-0.000155273	3.90625e-05
-1.2207e-05	1.66016e-05	3.71094e-05	-9.76563e-07	-0.000125	2.68555e-06	2.83203e-05	6.83594e-06	0.000225586	2.14844e-05	-8.20313e-05	3.66211e-05
-8.30078e-06	1.5625e-05	1.26953e-05	2.92969e-06	-0.000118164	5.12695e-06	3.51562e-05	9.27734e-06	0.000213867	2.05078e-05	-1.85547e-05	3.90625e-05
-5.85938e-06	1.5625e-05	2.73438e-05	8.78906e-06	-5.76172e-05	2.19727e-06	3.90625e-05	8.30078e-06	9.47266e-05	1.5625e-05	-1.36719e-05	3.66211e-05
-9.76563e-07	1.75781e-05	8.10547e-05	1.07422e-05	-1.95313e-05	2.44141e-06	4.88281e-05	7.32422e-06	-0.000101562	1.46484e-05	1.5625e-05	4.15039e-05
4.39453e-06	1.75781e-05	-8.78906e-05	8.30078e-06	1.17188e-05	2.68555e-06	5.66406e-05	7.32422e-06	-0.000216797	1.46484e-05	2.24609e-05	3.41797e-05
6.34766e-06	2.14844e-05	-0.000168945	3.41797e-06	5.46875e-05	3.90625e-06	5.46875e-05	8.30078e-06	-0.000140625	1.66016e-05	2.53906e-05	3.66211e-05
3.90625e-06	1.95313e-05	-9.76563e-05	6.34766e-06	0.000179687	4.39453e-06	4.49219e-05	1.02539e-05	-7.71484e-05	1.5625e-05	3.71094e-05	3.66211e-05
-4.88281e-07	1.75781e-05	4.39453e-05	1.26953e-05	0.000118164	4.88281e-06	3.41797e-05	9.76563e-06	-8.78906e-06	1.75781e-05	5.76172e-05	4.15039e-05
-1.95313e-06	1.5625e-05	0.000222656	1.31836e-05	-5.56641e-05	4.88281e-06	5.27344e-05	6.83594e-06	0.000101562	1.66016e-05	7.51953e-05	4.63867e-05
-1.95313e-06	1.46484e-05	0.000260742	3.41797e-06	-0.000115234	3.90625e-06	5.17578e-05	4.39453e-06	0.000154297	1.95313e-05	0.000108398	4.39453e-05
4.88281e-07	1.66016e-05	0.000116211	6.34766e-06	-6.93359e-05	2.19727e-06	4.58984e-05	6.83594e-06	5.37109e-05	1.66016e-05	0.000105469	3.90625e-05
4.88281e-07	1.95313e-05	-4.19922e-05	1.17188e-05	-3.80859e-05	2.44141e-07	4.39453e-05	8.78906e-06	2.83203e-05	1.5625e-05	8.59375e-05	3.66211e-05
4.88281e-07	1.66016e-05	-9.96094e-05	9.27734e-06	-1.46484e-05	-9.76563e-07	4.00391e-05	7.8125e-06	-0.000235352	1.5625e-05	6.44531e-05	3.66211e-05
4.88281e-07	1.46484e-05	-4.29687e-05	9.27734e-06	2.14844e-05	2.92969e-06	3.90625e-05	7.32422e-06	-0.000255859	1.66016e-05	9.76563e-05	4.63867e-05
-9.76563e-07	1.5625e-05	5.85938e-06	1.2207e-05	6.15234e-05	3.90625e-06	4.00391e-05	6.34766e-06	-0.000244141	1.5625e-05	0.000100586	4.15039e-05
9.76563e-07	1.85547e-05	1.66016e-05	1.26953e-05	7.42187e-05	7.32422e-06	3.61328e-05	4.88281e-06	-2.53906e-05	1.36719e-05	6.44531e-05	3.41797e-05
-9.76563e-07	1.75781e-05	2.44141e-05	6.34766e-06	3.71094e-05	7.32422e-06	2.92969e-05	3.90625e-06	0.000359375	1.66016e-05	2.92969e-06	3.17383e-05
1.46484e-06	1.66016e-05	1.95313e-05	7.32422e-06	1.07422e-05	6.34766e-06	2.73438e-05	5.37109e-06	0.000398437	1.75781e-05	-6.44531e-05	3.41797e-05
3.41797e-06	1.46484e-05	1.26953e-05	6.83594e-06	1.75781e-05	5.37109e-06	1.5625e-05	5.37109e-06	7.61719e-05	1.66016e-05	6.44531e-05	3.41797e-05
1.46484e-06	1.95313e-05	1.07422e-05	5.37109e-06	2.53906e-05	6.5918e-06	1.85547e-05	6.83594e-06	-3.80859e-05	1.5625e-05	0.000249023	3.66211e-05
0	2.05078e-05	5.85938e-06	4.88281e-06	1.95313e-05	4.39453e-06	2.44141e-05	8.78906e-06	-0.000165039	1.36719e-05	0.000165039	3.90625e-05
2.92969e-06	1.66016e-05	1.46484e-05	6.34766e-06	7.8125e-06	9.76563e-07	3.71094e-05	8.30078e-06	-0.000209961	1.46484e-05	5.37109e-05	4.39453e-05
4.39453e-06	1.5625e-05	2.73438e-05	9.76563e-06	-5.85938e-06	1.2207e-06	4.6875e-05	6.83594e-06	-4.98047e-05	1.5625e-05	-3.125e-05	4.39453e-05
9.76563e-07	1.66016e-05	3.02734e-05	8.30078e-06	0	5.12695e-06	4.00391e-05	8.78906e-06	-0.000125977	1.5625e-05	-0.000133789	4.63867e-05
4.88281e-07	1.75781e-05	2.83203e-05	8.30078e-06	2.44141e-05	2.19727e-06	3.22266e-05	8.78906e-06	-0.000253906	1.66016e-05	-0.000169922	4.15039e-05
1.95313e-06	1.5625e-05	2.44141e-05	6.34766e-06	4.19922e-05	1.46484e-06	2.14844e-05	1.02539e-05	-0.000219727	1.66016e-05	-0.00012793	4.88281e-05
7.32422e-06	1.5625e-05	1.85547e-05	6.34766e-06	-2.92969e-06	1.2207e-06	1.46484e-05	1.02539e-05	0.000383789	1.75781e-05	-3.51562e-05	4.88281e-05
6.34766e-06	1.5625e-05	1.66016e-05	6.34766e-06	-6.44531e-05	2.68555e-06	1.46484e-05	9.76563e-06	0.000682617	1.95313e-05	2.05078e-05	4.63867e-05
6.34766e-06	1.5625e-05	1.26953e-05	6.34766e-06	-5.56641e-05	3.41797e-06	6.83594e-06	5.85938e-06	0.000262695	2.14844e-05	1.95313e-05	3.90625e-05
3.90625e-06	1.46484e-05	2.14844e-05	2.44141e-06	-2.92969e-06	4.15039e-06	8.78906e-06	5.37109e-06	-0.000144531	2.14844e-05	3.32031e-05	4.15039e-05
3.41797e-06	1.26953e-05	3.125e-05	0	4.29687e-05	3.90625e-06	2.14844e-05	1.95313e-06	-0.000167969	1.85547e-05	5.85937e-05	3.90625e-05
4.39453e-06	1.46484e-05	3.41797e-05	2.44141e-06	6.25e-05	6.10352e-06	1.66016e-05	4.88281e-07	-6.05469e-05	1.66016e-05	6.93359e-05	4.15039e-05
6.34766e-06	1.75781e-05	3.41797e-05	5.37109e-06	6.64063e-05	5.37109e-06	-3.90625e-06	4.88281e-07	-0.000198242	1.17188e-05	4.19922e-05	3.66211e-05
5.85938e-06	1.5625e-05	1.46484e-05	1.31836e-05	6.34766e-05	6.10352e-06	4.78516e-05	3.90625e-06	-0.000292969	1.46484e-05	2.44141e-05	4.15039e-05
6.34766e-06	1.5625e-05	8.78906e-06	1.41602e-05	5.07812e-05	5.85938e-06	0.000100586	6.34766e-06	2.92969e-05	1.17188e-05	2.73438e-05	4.15039e-05
6.34766e-06	1.46484e-05	9.76563e-07	2.44141e-06	5.07812e-05	5.85938e-06	7.42187e-05	8.78906e-06	0.000158203	1.46484e-05	4.58984e-05	4.15039e-05
7.8125e-06	1.75781e-05	-6.83594e-06	1.66016e-05	5.07812e-05	4.15039e-06	-3.90625e-06	1.02539e-05	0.000131836	1.26953e-05	5.27344e-05	3.90625e-05
8.78906e-06	1.46484e-05	3.125e-05	3.07617e-05	4.98047e-05	4.63867e-06	-8.59375e-05	1.07422e-05	-1.95313e-05	1.46484e-05	6.83594e-05	3.90625e-05
7.32422e-06	1.46484e-05	-5.85938e-06	3.41797e-05	5.07812e-05	2.92969e-06	-0.000114258	6.34766e-06	0.000189453	1.26953e-05	8.00781e-05	3.90625e-05
1.17188e-05	1.5625e-05	-1.07422e-05	1.95313e-05	2.24609e-05	3.66211e-06	-5.37109e-05	1.12305e-05	0.000510742	1.75781e-05	7.8125e-05	4.39453e-05
1.2207e-05	1.46484e-05	-2.92969e-06	6.34766e-06	-7.8125e-06	2.44141e-06	-4.58984e-05	1.26953e-05	0.000594727	1.95313e-05	3.51562e-05	4.15039e-05
1.17188e-05	1.5625e-05	-4.88281e-06	3.90625e-06	6.64063e-05	2.92969e-06	-5.56641e-05	1.41602e-05	0.00030957	1.85547e-05	-1.36719e-05	4.63867e-05
1.02539e-05	1.95313e-05	0	-1.46484e-06	-3.90625e-06	1.95313e-06	-3.90625e-06	1.46484e-05	-5.85938e-06	2.05078e-05	-4.98047e-05	4.39453e-05
7.8125e-06	1.75781e-05	1.75781e-05	-7.8125e-06	1.95313e-05	1.46484e-06	4.88281e-06	1.61133e-05	-0.00015625	2.44141e-05	-7.51953e-05	4.39453e-05
1.12305e-05	1.66016e-05	1.17188e-05	7.8125e-06	7.91016e-05	1.46484e-06	1.95313e-06	1.2207e-05	-0.000256836	1.85547e-05	-0.000109375	4.15039e-05
1.02539e-05	1.46484e-05	2.63672e-05	6.83594e-06	6.64063e-05	1.2207e-06	7.22656e-05	9.76563e-06	-0.000289062	1.85547e-05	-0.000134766	4.15039e-05
9.76563e-06	1.36719e-05	2.34375e-05	8.78906e-06	2.05078e-05	2.19727e-06	0.00012207	8.78906e-06	-0.000227539	1.66016e-05	-3.22266e-05	3.66211e-05
1.07422e-05	1.46484e-05	1.17188e-05	1.61133e-05	2.24609e-05	3.90625e-06	0.000117187	8.78906e-06	-7.03125e-05	1.85547e-05	0.000379883	3.90625e-05
8.78906e-06	1.66016e-05	9.76563e-06	9.27734e-06	3.02734e-05	2.68555e-06	7.22656e-05	9.27734e-06	-9.76563e-06	1.5625e-05	0.000454102	3.66211e-05
9.27734e-06	1.26953e-05	1.07422e-05	6.83594e-06	1.66016e-05	2.44141e-06	-1.36719e-05	7.32422e-06	3.32031e-05	1.66016e-05	0.000164063	3.90625e-05
1.12305e-05	1.26953e-05	1.5625e-05	3.90625e-06	2.24609e-05	4.63867e-06	-4.49219e-05	9.27734e-06	6.05469e-05	1.26953e-05	8.30078e-05	3.41797e-05
1.02539e-05	1.46484e-05	1.46484e-05	9.27734e-06	2.44141e-05	1.2207e-06	1.36719e-05	7.32422e-06	2.63672e-05	1.46484e-05	1.95313e-06	3.90625e-05
1.2207e-05	1.75781e-05	2.92969e-06	2.34375e-05	7.61719e-05	1.95313e-06	6.44531e-05	8.30078e-06	9.08203e-05	1.36719e-05	0.00015918	3.66211e-05
1.2207e-05	1.75781e-05	4.88281e-06	1.61133e-05	8.30078e-05	2.19727e-06	3.90625e-05	1.02539e-05	0.000209961	1.5625e-05	0.000290039	4.39453e-05
1.17188e-05	1.75781e-05	9.76563e-06	9.76563e-06	3.90625e-05	1.2207e-06	-2.34375e-05	1.02539e-05	0.000183594	1.5625e-05	-1.85547e-05	4.88281e-05
1.07422e-05	1.75781e-05	1.46484e-05	8.78906e-06	-3.32031e-05	9.76563e-07	-4.88281e-06	7.32422e-06	3.61328e-05	1.85547e-05	-0.000369141	4.88281e-05
1.02539e-05	1.75781e-05	2.53906e-05	9.76563e-06	-0.000145508	2.44141e-06	9.66797e-05	5.37109e-06	0.000166016	1.66016e-05	-0.000558594	4.63867e-05
1.02539e-05	1.66016e-05	4.88281e-06	7.8125e-06	0	3.66211e-06	3.125e-05	7.8125e-06	9.47266e-05	1.85547e-05	-0.000430664	4.88281e-05
8.78906e-06	1.5625e-05	5.85938e-06	1.07422e-05	0.000165039	1.70898e-06	-0.000253906	7.32422e-06	-4.98047e-05	1.5625e-05	-0.000407227	4.88281e-05
9.76563e-06	1.85547e-05	1.07422e-05	6.83594e-06	6.54297e-05	3.17383e-06	-0.000423828	7.32422e-06	6.15234e-05	1.75781e-05	-0.000355469	5.61523e-05
1.12305e-05	1.75781e-05	1.66016e-05	9.76563e-06	-9.47266e-05	5.12695e-06	-0.000251953	9.27734e-06	1.36719e-05	1.66016e-05	-0.000174805	4.15039e-05
1.17188e-05	1.66016e-05	1.85547e-05	9.76563e-06	-0.000106445	6.34766e-06	9.375e-05	8.78906e-06	-0.00018457	1.66016e-05	-8.78906e-06	3.17383e-05
9.27734e-06	1.75781e-05	1.95313e-05	7.32422e-06	-6.25e-05	4.15039e-06	0.000181641	8.78906e-06	-0.000150391	1.66016e-05	0.000151367	2.68555e-05
1.12305e-05	1.75781e-05	2.05078e-05	7.32422e-06	-1.07422e-05	6.34766e-06	0.000146484	1.31836e-05	-4.58984e-05	1.46484e-05	0.000200195	3.41797e-05
9.27734e-06	1.85547e-05	2.24609e-05	6.83594e-06	-5.85938e-06	5.12695e-06	0.000196289	1.66016e-05	7.22656e-05	1.46484e-05	0.000374023	4.15039e-05
1.02539e-05	1.85547e-05	2.14844e-05	8.30078e-06	-2.73438e-05	3.90625e-06	0.00021582	1.75781e-05	0.000158203	1.66016e-05	0.000545898	4.63867e-05
1.02539e-05	1.46484e-05	1.95313e-05	7.8125e-06	1.46484e-05	3.17383e-06	7.32422e-05	1.85547e-05	5.46875e-05	1.5625e-05	0.000538086	4.15039e-05
1.12305e-05	1.36719e-05	1.85547e-05	6.83594e-06	8.78906e-05	4.88281e-06	-1.85547e-05	1.41602e-05	-0.000130859	1.66016e-05	0.000401367	4.15039e-05
9.27734e-06	1.17188e-05	1.75781e-05	4.88281e-06	0.000167969	3.17383e-06	3.41797e-05	9.76563e-06	-0.000134766	1.75781e-05	0.000369141	4.39453e-05
8.78906e-06	1.26953e-05	1.85547e-05	3.41797e-06	0.000162109	2.19727e-06	5.07812e-05	6.34766e-06	-0.000136719	1.95313e-05	-2.63672e-05	5.37109e-05
9.76563e-06	1.26953e-05	2.05078e-05	3.41797e-06	4.98047e-05	4.15039e-06	-3.90625e-06	4.88281e-06	-0.000111328	1.85547e-05	-0.000373047	4.63867e-05
9.27734e-06	1.75781e-05	1.85547e-05	8.30078e-06	-6.25e-05	5.37109e-06	-5.85937e-05	2.92969e-06	-8.49609e-05	1.95313e-05	-0.000400391	4.39453e-05
8.78906e-06	1.66016e-05	1.85547e-05	8.30078e-06	-7.12891e-05	3.41797e-06	-4.00391e-05	2.44141e-06	-2.92969e-05	1.5625e-05	-0.000338867	3.41797e-05
9.27734e-06	1.85547e-05	2.05078e-05	7.32422e-06	-5.46875e-05	1.70898e-06	-1.95313e-05	-4.88281e-07	2.05078e-05	1.75781e-05	-0.00027832	3.90625e-05
9.27734e-06	1.85547e-05	1.95313e-05	4.39453e-06	-3.51562e-05	4.39453e-06	-0.000108398	1.46484e-06	5.56641e-05	1.66016e-05	-0.000274414	4.39453e-05
7.32422e-06	1.85547e-05	1.95313e-05	4.88281e-06	-4.29687e-05	5.12695e-06	-0.000110352	3.90625e-06	6.93359e-05	1.85547e-05	-0.000237305	5.61523e-05
8.78906e-06	1.66016e-05	2.14844e-05	4.88281e-06	-9.375e-05	5.61523e-06	-5.07812e-05	8.78906e-06	6.83594e-05	1.66016e-05	-7.91016e-05	5.12695e-05
9.76563e-06	1.95313e-05	2.73438e-05	4.88281e-06	-7.8125e-05	6.5918e-06	4.88281e-05	9.27734e-06	6.44531e-05	1.85547e-05	-2.14844e-05	4.39453e-05
9.76563e-06	1.85547e-05	1.75781e-05	6.34766e-06	-3.32031e-05	4.88281e-06	0.000119141	1.46484e-05	2.53906e-05	1.5625e-05	2.92969e-06	3.41797e-05
9.27734e-06	1.75781e-05	9.76563e-06	6.34766e-06	1.17188e-05	4.63867e-06	9.57031e-05	1.41602e-05	7.8125e-06	1.75781e-05	7.32422e-05	3.66211e-05
8.78906e-06	1.5625e-05	1.26953e-05	5.85938e-06	4.98047e-05	4.88281e-06	3.90625e-05	1.07422e-05	2.92969e-06	1.5625e-05	9.96094e-05	4.39453e-05
9.27734e-06	1.5625e-05	1.66016e-05	5.85938e-06	5.37109e-05	3.41797e-06	2.05078e-05	8.78906e-06	7.8125e-06	1.75781e-05	0.000211914	5.12695e-05
7.32422e-06	1.66016e-05	2.14844e-05	5.85938e-06	5.37109e-05	6.10352e-06	1.85547e-05	7.8125e-06	5.95703e-05	1.75781e-05	0.000231445	3.90625e-05
4.39453e-06	1.75781e-05	2.24609e-05	5.85938e-06	5.07812e-05	7.8125e-06	3.32031e-05	9.76563e-06	1.26953e-05	1.5625e-05	0.000123047	4.15039e-05
3.41797e-06	1.66016e-05	2.34375e-05	5.37109e-06	4.19922e-05	6.83594e-06	5.46875e-05	9.76563e-06	-8.98437e-05	1.46484e-05	6.64063e-05	4.15039e-05
7.8125e-06	1.46484e-05	2.14844e-05	7.32422e-06	3.71094e-05	7.08008e-06	7.32422e-05	6.83594e-06	-0.000105469	1.85547e-05	7.61719e-05	4.39453e-05
1.02539e-05	1.46484e-05	2.24609e-05	8.30078e-06	2.92969e-05	4.39453e-06	7.8125e-05	5.37109e-06	-2.24609e-05	1.66016e-05	0.000124023	3.90625e-05
7.32422e-06	1.66016e-05	2.14844e-05	7.32422e-06	1.17188e-05	5.85938e-06	4.98047e-05	7.32422e-06	-1.17188e-05	1.95313e-05	0.000112305	3.90625e-05
6.83594e-06	1.36719e-05	1.95313e-05	6.34766e-06	1.46484e-05	3.41797e-06	2.14844e-05	5.37109e-06	0.000102539	1.66016e-05	6.54297e-05	3.41797e-05
1.02539e-05	1.07422e-05	2.14844e-05	8.78906e-06	1.85547e-05	3.66211e-06	9.76563e-07	5.85938e-06	0.000175781	1.75781e-05	5.46875e-05	4.15039e-05
7.8125e-06	1.26953e-05	1.75781e-05	6.83594e-06	1.46484e-05	9.76563e-07	-6.83594e-06	4.39453e-06	7.71484e-05	1.66016e-05	1.95313e-06	3.90625e-05
3.41797e-06	1.46484e-05	1.46484e-05	9.27734e-06	1.36719e-05	2.44141e-06	9.76563e-07	6.34766e-06	-9.08203e-05	1.85547e-05	8.49609e-05	3.90625e-05
1.95313e-06	1.95313e-05	1.36719e-05	8.30078e-06	1.66016e-05	1.46484e-06	1.46484e-05	9.27734e-06	-0.000135742	1.75781e-05	3.80859e-05	3.41797e-05
-1.2207e-05	2.44141e-05	1.85547e-05	8.78906e-06	1.66016e-05	4.88281e-07	2.73438e-05	1.2207e-05	-8.88672e-05	1.85547e-05	1.36719e-05	4.39453e-05
-3.32031e-05	2.24609e-05	2.05078e-05	8.30078e-06	1.85547e-05	1.2207e-06	2.05078e-05	8.30078e-06	-2.05078e-05	1.85547e-05	3.71094e-05	4.39453e-05
-6.15234e-05	2.14844e-05	2.34375e-05	8.78906e-06	2.53906e-05	2.68555e-06	2.44141e-05	9.27734e-06	3.80859e-05	1.85547e-05	5.76172e-05	4.15039e-05
-5.66406e-05	2.05078e-05	2.05078e-05	1.07422e-05	2.92969e-05	4.63867e-06	3.32031e-05	8.30078e-06	7.22656e-05	1.75781e-05	3.80859e-05	3.66211e-05
-1.36719e-05	1.75781e-05	2.05078e-05	7.8125e-06	3.02734e-05	3.17383e-06	3.125e-05	6.83594e-06	8.59375e-05	1.66016e-05	0	3.66211e-05
5.61523e-05	1.46484e-05	1.95313e-05	9.27734e-06	3.02734e-05	2.19727e-06	2.92969e-05	4.88281e-06	7.61719e-05	1.66016e-05	-6.54297e-05	3.41797e-05
0.00011084	1.5625e-05	1.95313e-05	7.8125e-06	3.61328e-05	2.68555e-06	2.63672e-05	7.32422e-06	5.17578e-05	1.75781e-05	-8.20313e-05	4.15039e-05
9.375e-05	1.36719e-05	1.75781e-05	7.32422e-06	3.71094e-05	2.92969e-06	4.19922e-05	7.8125e-06	4.10156e-05	1.75781e-05	-1.75781e-05	3.66211e-05
2.97852e-05	1.26953e-05	1.46484e-05	7.32422e-06	3.41797e-05	2.92969e-06	3.32031e-05	7.32422e-06	5.85937e-05	1.66016e-05	5.76172e-05	4.15039e-05
9.76563e-07	1.26953e-05	1.46484e-05	1.07422e-05	3.22266e-05	3.66211e-06	3.80859e-05	6.34766e-06	4.88281e-05	1.5625e-05	8.30078e-05	4.15039e-05
-1.2207e-05	1.5625e-05	1.46484e-05	9.76563e-06	3.125e-05	3.17383e-06	3.71094e-05	9.76563e-06	-2.53906e-05	1.85547e-05	6.64063e-05	4.39453e-05
-7.8125e-06	1.95313e-05	1.5625e-05	9.27734e-06	3.02734e-05	3.41797e-06	3.32031e-05	7.8125e-06	-0.000109375	1.66016e-05	2.05078e-05	4.15039e-05
-1.07422e-05	1.66016e-05	1.66016e-05	9.76563e-06	2.92969e-05	3.66211e-06	2.73438e-05	5.85938e-06	-9.27734e-05	1.75781e-05	2.14844e-05	3.90625e-05
-1.26953e-05	1.36719e-05	1.5625e-05	8.30078e-06	2.83203e-05	2.68555e-06	2.53906e-05	7.32422e-06	-1.17188e-05	1.5625e-05	1.66016e-05	3.90625e-05
2.68555e-05	1.5625e-05	1.75781e-05	8.30078e-06	2.53906e-05	2.19727e-06	1.26953e-05	7.32422e-06	0.000140625	1.75781e-05	1.36719e-05	4.15039e-05
2.19727e-05	1.75781e-05	1.36719e-05	7.8125e-06	2.14844e-05	1.95313e-06	2.44141e-05	7.32422e-06	0.000206055	1.66016e-05	7.8125e-06	3.90625e-05
1.36719e-05	1.66016e-05	1.5625e-05	6.83594e-06	1.95313e-05	9.76563e-07	2.53906e-05	6.34766e-06	0.000208008	1.85547e-05	1.26953e-05	3.90625e-05
2.14844e-05	2.05078e-05	1.75781e-05	9.27734e-06	1.75781e-05	1.46484e-06	2.05078e-05	7.8125e-06	-1.75781e-05	1.75781e-05	6.83594e-06	3.66211e-05
5.95703e-05	1.95313e-05	1.66016e-05	8.78906e-06	1.17188e-05	1.70898e-06	1.46484e-05	7.32422e-06	-0.000105469	1.85547e-05	-4.88281e-06	3.90625e-05
2.53906e-05	1.66016e-05	1.85547e-05	1.02539e-05	1.07422e-05	4.88281e-07	1.17188e-05	7.32422e-06	-0.000121094	1.5625e-05	-2.44141e-05	3.17383e-05
-6.05469e-05	1.36719e-05	1.66016e-05	9.76563e-06	1.5625e-05	1.46484e-06	9.76563e-06	7.32422e-06	-0.000129883	1.36719e-05	-1.75781e-05	3.66211e-05
-7.86133e-05	1.66016e-05	1.5625e-05	8.30078e-06	2.05078e-05	2.44141e-06	8.78906e-06	6.34766e-06	-3.32031e-05	1.5625e-05	-1.07422e-05	4.39453e-05
-2.29492e-05	9.76563e-06	1.46484e-05	9.27734e-06	3.125e-05	2.92969e-06	9.76563e-06	6.83594e-06	9.76563e-05	1.75781e-05	3.90625e-06	5.12695e-05
8.39844e-05	5.85938e-06	1.66016e-05	9.27734e-06	4.29687e-05	7.32422e-07	1.07422e-05	8.78906e-06	0.000240234	1.66016e-05	-1.95313e-06	4.39453e-05
4.24805e-05	4.88281e-06	1.75781e-05	9.76563e-06	4.39453e-05	2.19727e-06	3.22266e-05	8.30078e-06	0.000293945	1.75781e-05	-2.92969e-06	4.39453e-05
3.51562e-05	7.8125e-06	1.5625e-05	9.76563e-06	2.92969e-05	2.68555e-06	4.10156e-05	6.34766e-06	0.000205078	1.66016e-05	-4.88281e-06	4.15039e-05
3.95508e-05	1.36719e-05	1.5625e-05	8.78906e-06	1.46484e-05	2.92969e-06	7.8125e-06	8.30078e-06	7.61719e-05	1.5625e-05	9.76563e-07	4.15039e-05
5.17578e-05	1.85547e-05	1.5625e-05	7.8125e-06	0	3.66211e-06	-1.5625e-05	6.34766e-06	-3.51562e-05	1.5625e-05	-9.76563e-07	4.15039e-05
4.78516e-05	2.14844e-05	1.36719e-05	8.30078e-06	-1.17188e-05	2.44141e-06	3.32031e-05	5.85938e-06	-9.76563e-05	1.75781e-05	2.92969e-06	4.15039e-05
4.05273e-05	2.24609e-05	1.26953e-05	7.8125e-06	-1.85547e-05	2.19727e-06	2.24609e-05	4.39453e-06	-0.000350586	1.66016e-05	0	3.90625e-05
4.6875e-05	2.05078e-05	8.78906e-06	8.78906e-06	-2.53906e-05	1.70898e-06	-5.95703e-05	5.85938e-06	-0.000311523	2.14844e-05	6.83594e-06	4.15039e-05
4.39453e-05	1.17188e-05	1.46484e-05	9.27734e-06	0	1.95313e-06	-9.27734e-05	8.30078e-06	-3.90625e-06	1.85547e-05	8.78906e-06	3.90625e-05
3.4668e-05	1.5625e-05	1.75781e-05	9.27734e-06	5.66406e-05	4.15039e-06	-3.71094e-05	1.12305e-05	3.90625e-05	1.66016e-05	1.36719e-05	4.39453e-05
3.90625e-06	1.5625e-05	1.75781e-05	8.78906e-06	3.71094e-05	3.41797e-06	2.83203e-05	1.02539e-05	0.000106445	1.46484e-05	1.17188e-05	3.90625e-05
-4.15039e-05	1.36719e-05	1.5625e-05	8.78906e-06	-0.000118164	9.76563e-07	6.83594e-05	9.76563e-06	0.000291016	1.36719e-05	1.75781e-05	4.15039e-05
-2.19727e-05	9.76563e-06	1.66016e-05	8.78906e-06	-7.42187e-05	-4.88281e-07	6.34766e-05	1.12305e-05	0.000320313	1.46484e-05	1.66016e-05	4.15039e-05
-8.30078e-06	8.78906e-06	1.66016e-05	8.30078e-06	7.22656e-05	-1.2207e-06	4.88281e-05	1.12305e-05	0.000262695	1.95313e-05	2.14844e-05	4.15039e-05
-1.41602e-05	1.36719e-05	1.5625e-05	8.30078e-06	6.54297e-05	-1.46484e-06	3.125e-05	1.02539e-05	0.000112305	1.66016e-05	2.14844e-05	3.90625e-05
-5.37109e-06	1.46484e-05	1.66016e-05	8.30078e-06	-0.000201172	-2.19727e-06	3.51562e-05	1.07422e-05	-8.98437e-05	1.36719e-05	3.125e-05	4.15039e-05
4.88281e-07	1.5625e-05	1.5625e-05	7.8125e-06	-0.000223633	1.70898e-06	5.85937e-05	8.30078e-06	-0.000220703	1.5625e-05	2.53906e-05	3.90625e-05
6.83594e-06	1.66016e-05	1.5625e-05	8.78906e-06	2.05078e-05	4.39453e-06	7.03125e-05	7.32422e-06	-0.000297852	1.95313e-05	2.63672e-05	4.63867e-05
1.02539e-05	1.85547e-05	1.66016e-05	1.02539e-05	0.000152344	6.5918e-06	3.02734e-05	4.39453e-06	-0.000269531	1.85547e-05	1.46484e-05	4.15039e-05
6.83594e-06	1.75781e-05	1.66016e-05	6.83594e-06	0.00012207	7.8125e-06	-7.51953e-05	5.85938e-06	2.92969e-05	2.14844e-05	2.05078e-05	3.90625e-05
5.37109e-06	1.85547e-05	1.46484e-05	8.30078e-06	9.375e-05	8.54492e-06	-7.61719e-05	3.90625e-06	0.000204102	1.66016e-05	2.63672e-05	4.15039e-05
1.17188e-05	2.05078e-05	1.5625e-05	8.30078e-06	0.000108398	1.14746e-05	-8.78906e-06	3.90625e-06	7.42187e-05	1.46484e-05	2.92969e-05	4.39453e-05
1.31836e-05	1.75781e-05	1.46484e-05	9.27734e-06	0.000116211	1.26953e-05	8.10547e-05	3.90625e-06	1.17188e-05	1.46484e-05	2.53906e-05	3.90625e-05
1.07422e-05	1.36719e-05	1.66016e-05	9.76563e-06	0.000101562	1.2207e-05	0.000140625	8.30078e-06	-3.51562e-05	2.14844e-05	2.92969e-05	4.39453e-05
2.44141e-06	1.46484e-05	1.5625e-05	9.27734e-06	7.22656e-05	1.34277e-05	-4.98047e-05	1.17188e-05	0.000148437	2.14844e-05	2.53906e-05	4.39453e-05
-2.44141e-06	1.66016e-05	1.5625e-05	7.8125e-06	3.71094e-05	8.54492e-06	-0.000196289	1.12305e-05	0.000337891	2.05078e-05	2.73438e-05	4.15039e-05
-1.07422e-05	1.75781e-05	1.5625e-05	7.8125e-06	9.76563e-07	4.63867e-06	-0.000210937	1.12305e-05	6.64063e-05	1.95313e-05	-1.85547e-05	3.90625e-05
-1.41602e-05	1.85547e-05	1.46484e-05	9.76563e-06	-2.34375e-05	9.76563e-07	-6.25e-05	8.78906e-06	-0.000158203	1.95313e-05	9.17969e-05	4.15039e-05
-1.70898e-05	1.95313e-05	1.46484e-05	8.78906e-06	-1.5625e-05	1.2207e-06	5.17578e-05	1.02539e-05	-0.00022168	1.66016e-05	0.000170898	3.66211e-05
-1.51367e-05	1.95313e-05	1.46484e-05	8.78906e-06	-1.95313e-05	3.66211e-06	0.000118164	1.36719e-05	-0.000174805	1.66016e-05	0.000118164	3.66211e-05
-1.46484e-05	1.95313e-05	1.66016e-05	9.27734e-06	-6.54297e-05	0	0.000103516	1.51367e-05	-0.00012207	1.46484e-05	-5.85938e-06	3.17383e-05
-9.27734e-06	1.95313e-05	2.44141e-05	9.76563e-06	2.63672e-05	-3.90625e-06	9.66797e-05	1.17188e-05	-0.000160156	1.66016e-05	-0.000115234	4.15039e-05
-7.32422e-06	2.05078e-05	1.07422e-05	1.02539e-05	0.000449219	-9.76563e-07	9.08203e-05	8.30078e-06	-3.22266e-05	1.5625e-05	-7.42187e-05	4.63867e-05
-6.83594e-06	2.05078e-05	6.83594e-06	8.30078e-06	0.000381836	7.32422e-07	0.000108398	5.85938e-06	0.000189453	1.75781e-05	1.07422e-05	4.39453e-05
-6.83594e-06	2.14844e-05	1.46484e-05	7.8125e-06	-6.73828e-05	1.46484e-06	1.66016e-05	9.27734e-06	0.000171875	1.46484e-05	0.000479492	3.90625e-05
-1.95313e-06	1.95313e-05	1.46484e-05	6.83594e-06	-0.000347656	3.66211e-06	-2.63672e-05	9.27734e-06	0.000160156	1.66016e-05	0.000572266	3.66211e-05
4.88281e-07	1.95313e-05	1.5625e-05	8.30078e-06	-0.000270508	4.15039e-06	5.85938e-06	6.34766e-06	0.000123047	1.75781e-05	0.000115234	4.15039e-05
-2.92969e-06	1.5625e-05	1.66016e-05	6.83594e-06	-0.000103516	8.54492e-06	-4.19922e-05	9.27734e-06	0.00015625	1.75781e-05	-0.000507813	4.63867e-05
-2.44141e-06	1.75781e-05	1.66016e-05	7.32422e-06	1.17188e-05	1.19629e-05	-0.000102539	1.07422e-05	0.000121094	1.5625e-05	-0.000686523	4.15039e-05
-2.44141e-06	1.75781e-05	1.66016e-05	8.30078e-06	1.26953e-05	1.07422e-05	-0.00015332	7.32422e-06	-2.34375e-05	1.85547e-05	-0.000414062	4.39453e-05
-5.37109e-06	1.85547e-05	1.5625e-05	7.8125e-06	0.000111328	9.0332e-06	-7.71484e-05	5.85938e-06	-6.05469e-05	1.75781e-05	-0.000123047	4.15039e-05
-5.37109e-06	1.75781e-05	1.85547e-05	7.8125e-06	0.000206055	9.76563e-06	-0.000102539	4.88281e-06	1.5625e-05	1.85547e-05	0.000217773	3.90625e-05
-3.41797e-06	1.85547e-05	1.85547e-05	8.78906e-06	6.83594e-05	8.30078e-06	0.000104492	4.88281e-06	0.000178711	1.66016e-05	0.000369141	3.17383e-05
-1.95313e-06	1.66016e-05	1.66016e-05	8.30078e-06	9.76563e-07	1.09863e-05	0.000302734	7.8125e-06	7.22656e-05	1.66016e-05	0.000307617	3.41797e-05
2.92969e-06	1.85547e-05	1.75781e-05	9.76563e-06	-2.53906e-05	8.54492e-06	0.000254883	1.02539e-05	-0.000169922	1.66016e-05	0.000441406	4.39453e-05
5.37109e-06	1.85547e-05	1.66016e-05	8.78906e-06	3.90625e-06	7.56836e-06	7.91016e-05	1.07422e-05	-0.000353516	1.85547e-05	0.000358398	4.88281e-05
7.8125e-06	1.75781e-05	1.75781e-05	7.8125e-06	4.00391e-05	4.39453e-06	-0.000166992	7.8125e-06	-0.000138672	1.5625e-05	1.17188e-05	4.39453e-05
8.78906e-06	1.66016e-05	1.46484e-05	8.30078e-06	4.6875e-05	4.88281e-07	-0.00022168	1.26953e-05	3.32031e-05	1.5625e-05	-0.000233398	4.15039e-05
1.02539e-05	1.5625e-05	1.46484e-05	8.78906e-06	5.27344e-05	0	-0.000114258	1.07422e-05	0.000123047	1.66016e-05	2.83203e-05	4.39453e-05
1.2207e-05	1.5625e-05	1.36719e-05	9.27734e-06	-3.51562e-05	-4.88281e-07	4.00391e-05	1.12305e-05	0.000233398	1.66016e-05	0.000162109	4.39453e-05
1.26953e-05	1.66016e-05	1.26953e-05	6.83594e-06	-0.000145508	-1.2207e-06	0.000112305	1.12305e-05	0.00019043	1.5625e-05	-1.95313e-05	3.41797e-05
1.31836e-05	1.75781e-05	1.07422e-05	8.78906e-06	-0.000108398	-1.2207e-06	0.00012793	1.17188e-05	0.000126953	1.75781e-05	-0.000308594	3.90625e-05
1.17188e-05	1.75781e-05	1.36719e-05	6.83594e-06	-3.80859e-05	-2.19727e-06	0.000105469	1.02539e-05	-0.000201172	1.46484e-05	-0.000362305	4.15039e-05
1.2207e-05	1.46484e-05	1.5625e-05	7.8125e-06	-4.6875e-05	-1.2207e-06	4.49219e-05	1.07422e-05	-0.000174805	1.36719e-05	-0.000308594	4.15039e-05
1.17188e-05	1.46484e-05	1.75781e-05	7.8125e-06	-2.73438e-05	1.70898e-06	1.26953e-05	1.36719e-05	9.375e-05	1.26953e-05	-0.000164063	4.15039e-05
1.2207e-05	1.66016e-05	1.95313e-05	8.78906e-06	-2.34375e-05	2.44141e-06	-1.66016e-05	1.31836e-05	0.000139648	1.36719e-05	0.000291016	4.15039e-05
1.41602e-05	1.66016e-05	2.05078e-05	8.30078e-06	0.000241211	3.90625e-06	-2.34375e-05	1.02539e-05	0.000197266	1.46484e-05	0.000666992	3.66211e-05
1.26953e-05	1.5625e-05	1.95313e-05	8.78906e-06	0.000294922	4.88281e-06	-1.95313e-06	6.34766e-06	0.000230469	1.66016e-05	0.000388672	4.63867e-05
1.31836e-05	1.46484e-05	1.5625e-05	8.30078e-06	-9.76563e-06	4.39453e-06	5.85937e-05	3.90625e-06	9.27734e-05	1.75781e-05	-0.000173828	4.63867e-05
1.26953e-05	1.5625e-05	1.95313e-05	7.8125e-06	-0.000213867	1.95313e-06	6.73828e-05	3.41797e-06	-0.000101562	1.75781e-05	-0.000319336	5.61523e-05
1.17188e-05	1.5625e-05	1.66016e-05	7.8125e-06	-0.000119141	1.46484e-06	-6.83594e-06	4.88281e-06	-0.000118164	1.5625e-05	-0.000318359	5.61523e-05
1.12305e-05	1.46484e-05	1.75781e-05	9.27734e-06	-3.22266e-05	2.92969e-06	-4.10156e-05	6.34766e-06	-8.59375e-05	1.36719e-05	-0.00024707	5.37109e-05
1.41602e-05	1.5625e-05	1.75781e-05	8.78906e-06	-0.000103516	4.88281e-06	9.76563e-07	8.78906e-06	-7.22656e-05	1.5625e-05	-0.000232422	4.15039e-05
1.26953e-05	1.66016e-05	1.75781e-05	8.78906e-06	-0.000119141	3.41797e-06	5.37109e-05	7.8125e-06	3.41797e-05	1.75781e-05	-0.0001875	3.90625e-05
1.51367e-05	1.5625e-05	1.75781e-05	8.30078e-06	-8.10547e-05	1.70898e-06	5.66406e-05	7.32422e-06	0.000149414	1.5625e-05	-0.000101562	3.90625e-05
1.41602e-05	1.5625e-05	1.66016e-05	7.32422e-06	-4.88281e-05	-2.44141e-07	4.98047e-05	9.76563e-06	0.000151367	1.85547e-05	2.53906e-05	4.88281e-05
1.31836e-05	1.46484e-05	1.5625e-05	8.30078e-06	-3.51562e-05	2.19727e-06	2.14844e-05	1.07422e-05	0.000102539	1.85547e-05	6.83594e-05	5.12695e-05
1.46484e-05	1.46484e-05	1.66016e-05	8.78906e-06	2.44141e-05	4.88281e-06	3.80859e-05	8.30078e-06	7.42187e-05	1.5625e-05	5.76172e-05	5.12695e-05
1.26953e-05	1.66016e-05	1.46484e-05	9.27734e-06	4.98047e-05	6.34766e-06	5.37109e-05	9.76563e-06	-7.8125e-06	1.5625e-05	1.75781e-05	3.90625e-05
1.26953e-05	1.5625e-05	1.66016e-05	8.78906e-06	0.000177734	1.95313e-06	3.51562e-05	1.02539e-05	-6.54297e-05	1.66016e-05	5.27344e-05	3.90625e-05
1.36719e-05	1.66016e-05	1.75781e-05	8.30078e-06	0.000236328	2.44141e-06	3.32031e-05	1.12305e-05	-5.76172e-05	1.36719e-05	0.000111328	3.41797e-05
1.2207e-05	1.5625e-05	1.75781e-05	7.8125e-06	0.000104492	2.92969e-06	3.02734e-05	1.07422e-05	3.125e-05	1.66016e-05	8.69141e-05	3.90625e-05
1.26953e-05	1.5625e-05	1.66016e-05	8.78906e-06	-1.07422e-05	2.44141e-06	4.88281e-05	7.8125e-06	2.73438e-05	1.66016e-05	2.73438e-05	3.66211e-05
1.12305e-05	1.46484e-05	1.66016e-05	7.32422e-06	-2.83203e-05	3.66211e-06	0.000103516	7.32422e-06	3.32031e-05	1.85547e-05	-1.26953e-05	3.90625e-05
1.2207e-05	1.36719e-05	1.66016e-05	7.32422e-06	4.00391e-05	4.39453e-06	0.000102539	7.32422e-06	-1.46484e-05	1.66016e-05	-7.12891e-05	4.15039e-05
1.26953e-05	1.46484e-05	1.5625e-05	7.8125e-06	5.85937e-05	3.90625e-06	5.27344e-05	9.27734e-06	-7.8125e-06	1.85547e-05	-3.32031e-05	4.15039e-05
1.02539e-05	1.66016e-05	1.75781e-05	8.30078e-06	4.29687e-05	4.88281e-07	-4.49219e-05	5.37109e-06	2.44141e-05	1.5625e-05	4.10156e-05	4.63867e-05
1.02539e-05	1.5625e-05	1.85547e-05	1.02539e-05	-9.76563e-06	2.44141e-07	-0.000180664	6.83594e-06	4.78516e-05	1.75781e-05	2.05078e-05	4.88281e-05
1.12305e-05	1.5625e-05	1.17188e-05	9.27734e-06	0.000117187	1.46484e-06	-0.000189453	6.34766e-06	3.61328e-05	1.75781e-05	-3.125e-05	4.63867e-05
1.2207e-05	1.5625e-05	7.8125e-06	7.32422e-06	0.000220703	9.76563e-07	5.17578e-05	4.88281e-06	-9.76563e-06	1.85547e-05	-4.78516e-05	4.63867e-05
1.17188e-05	1.66016e-05	1.17188e-05	7.8125e-06	0.000209961	1.70898e-06	0.000259766	4.88281e-06	-7.22656e-05	1.5625e-05	-5.37109e-05	3.90625e-05
1.12305e-05	1.46484e-05	1.85547e-05	8.30078e-06	-7.61719e-05	2.19727e-06	0.000154297	6.34766e-06	-8.49609e-05	1.5625e-05	-4.78516e-05	4.39453e-05
1.12305e-05	1.66016e-05	2.05078e-05	7.32422e-06	-0.00025	1.46484e-06	4.98047e-05	5.85938e-06	-2.05078e-05	1.5625e-05	-2.63672e-05	3.90625e-05
1.07422e-05	1.5625e-05	1.75781e-05	6.83594e-06	-0.000178711	1.46484e-06	-1.66016e-05	5.37109e-06	5.85937e-05	1.95313e-05	1.46484e-05	4.15039e-05
1.12305e-05	1.5625e-05	2.05078e-05	8.78906e-06	-1.75781e-05	7.32422e-07	-6.54297e-05	5.85938e-06	0.000138672	1.75781e-05	5.27344e-05	3.90625e-05
1.12305e-05	1.5625e-05	1.75781e-05	8.78906e-06	7.12891e-05	2.68555e-06	-0.000108398	5.85938e-06	0.000148437	1.66016e-05	7.22656e-05	3.90625e-05
9.27734e-06	1.66016e-05	1.75781e-05	8.30078e-06	3.71094e-05	1.2207e-06	-0.000117187	5.37109e-06	1.46484e-05	1.5625e-05	8.39844e-05	3.66211e-05
9.76563e-06	1.66016e-05	1.36719e-05	8.78906e-06	1.95313e-05	3.41797e-06	-0.000152344	5.85938e-06	-0.000132813	1.66016e-05	9.57031e-05	3.66211e-05
9.76563e-06	1.5625e-05	1.46484e-05	9.27734e-06	4.49219e-05	6.5918e-06	-9.57031e-05	7.32422e-06	-0.000112305	1.5625e-05	8.98437e-05	3.41797e-05
9.76563e-06	1.46484e-05	1.5625e-05	7.32422e-06	6.54297e-05	6.10352e-06	6.15234e-05	1.17188e-05	3.02734e-05	1.85547e-05	0.000100586	3.90625e-05
1.02539e-05	1.36719e-05	1.46484e-05	1.07422e-05	7.32422e-05	6.83594e-06	0.000138672	1.36719e-05	6.34766e-05	1.75781e-05	0.000114258	3.90625e-05
1.07422e-05	1.66016e-05	1.46484e-05	9.76563e-06	8.00781e-05	8.78906e-06	0.000213867	1.26953e-05	0.000192383	1.75781e-05	0.000109375	3.90625e-05
8.78906e-06	1.66016e-05	1.07422e-05	7.32422e-06	5.95703e-05	7.56836e-06	0.00012793	1.31836e-05	0.000413086	1.5625e-05	0.000104492	3.17383e-05
7.32422e-06	1.5625e-05	1.17188e-05	5.85938e-06	6.73828e-05	5.12695e-06	6.64063e-05	1.31836e-05	0.000275391	1.36719e-05	0.000167969	3.41797e-05
7.8125e-06	1.66016e-05	1.5625e-05	7.32422e-06	5.46875e-05	4.15039e-06	1.95313e-05	1.17188e-05	1.95313e-05	1.75781e-05	0.000128906	4.15039e-05
1.07422e-05	1.85547e-05	1.5625e-05	7.8125e-06	2.53906e-05	3.17383e-06	-4.88281e-06	1.07422e-05	-0.000107422	2.14844e-05	0.000111328	4.15039e-05
8.78906e-06	1.66016e-05	9.76563e-06	1.2207e-05	-2.92969e-06	3.17383e-06	-2.53906e-05	8.78906e-06	-0.00044043	1.85547e-05	8.59375e-05	3.66211e-05
8.78906e-06	1.36719e-05	3.90625e-06	1.41602e-05	-7.61719e-05	2.68555e-06	-3.41797e-05	1.02539e-05	-0.000603516	1.95313e-05	6.93359e-05	3.90625e-05
8.30078e-06	1.26953e-05	-3.90625e-06	1.31836e-05	3.22266e-05	1.95313e-06	-3.32031e-05	8.30078e-06	-0.000325195	1.66016e-05	4.10156e-05	3.41797e-05
8.30078e-06	1.36719e-05	-9.76563e-07	1.12305e-05	0.000124023	1.2207e-06	3.51562e-05	6.83594e-06	-0.000192383	1.85547e-05	4.00391e-05	3.90625e-05
7.8125e-06	1.85547e-05	1.07422e-05	8.30078e-06	1.95313e-05	4.88281e-07	0.00012207	7.32422e-06	3.125e-05	1.5625e-05	4.88281e-05	3.41797e-05
8.30078e-06	1.66016e-05	3.51562e-05	4.39453e-06	-6.83594e-05	-2.44141e-07	8.30078e-05	6.34766e-06	0.000292969	1.85547e-05	4.10156e-05	4.15039e-05
8.30078e-06	1.75781e-05	5.95703e-05	-3.41797e-06	-6.64063e-05	2.44141e-07	-2.44141e-05	7.8125e-06	0.000236328	1.66016e-05	4.29687e-05	4.15039e-05
6.83594e-06	1.75781e-05	5.95703e-05	-7.8125e-06	-4.10156e-05	3.41797e-06	-0.000123047	6.34766e-06	0.000162109	2.05078e-05	6.25e-05	4.15039e-05
6.83594e-06	1.85547e-05	3.61328e-05	4.88281e-07	-3.32031e-05	2.19727e-06	-0.000158203	6.34766e-06	6.15234e-05	1.5625e-05	6.54297e-05	3.66211e-05
7.8125e-06	1.85547e-05	1.17188e-05	5.85938e-06	-3.90625e-06	4.88281e-06	-9.86328e-05	7.32422e-06	8.49609e-05	1.75781e-05	6.44531e-05	4.15039e-05
8.30078e-06	1.75781e-05	2.92969e-06	1.17188e-05	4.88281e-06	4.15039e-06	1.17188e-05	9.76563e-06	0.00012793	1.46484e-05	4.49219e-05	3.90625e-05
8.30078e-06	1.5625e-05	4.39453e-05	1.17188e-05	2.14844e-05	5.61523e-06	4.78516e-05	9.76563e-06	0.000140625	1.75781e-05	2.53906e-05	4.15039e-05
1.07422e-05	1.5625e-05	2.44141e-05	1.46484e-05	3.125e-05	5.12695e-06	5.46875e-05	9.76563e-06	5.56641e-05	1.75781e-05	0	3.90625e-05
5.85938e-06	1.46484e-05	1.5625e-05	2.19727e-05	9.76563e-06	3.17383e-06	2.24609e-05	1.31836e-05	-8.39844e-05	1.85547e-05	-3.02734e-05	4.39453e-05
6.34766e-06	1.5625e-05	4.29687e-05	1.70898e-05	9.375e-05	3.41797e-06	-1.85547e-05	1.07422e-05	-0.000237305	1.85547e-05	-1.5625e-05	3.90625e-05
4.88281e-06	1.75781e-05	4.10156e-05	9.27734e-06	0.00022168	6.10352e-06	-6.83594e-06	1.02539e-05	-0.000204102	1.85547e-05	1.66016e-05	4.15039e-05
5.85938e-06	1.85547e-05	-1.17188e-05	2.44141e-06	0.000299805	5.37109e-06	3.32031e-05	1.31836e-05	-8.78906e-05	1.66016e-05	2.05078e-05	4.15039e-05
8.78906e-06	1.5625e-05	-5.56641e-05	4.88281e-07	0.000148437	2.92969e-06	6.34766e-05	1.12305e-05	-7.03125e-05	2.05078e-05	2.92969e-05	4.15039e-05
1.02539e-05	1.5625e-05	-8.49609e-05	2.92969e-06	-0.000121094	1.2207e-06	7.32422e-05	1.31836e-05	0.000114258	1.75781e-05	2.34375e-05	3.66211e-05
8.78906e-06	1.66016e-05	-6.15234e-05	1.95313e-06	-0.000222656	4.88281e-06	6.44531e-05	8.30078e-06	3.41797e-05	1.95313e-05	2.73438e-05	3.66211e-05
9.76563e-06	1.75781e-05	3.71094e-05	2.92969e-06	-0.000154297	2.44141e-06	5.95703e-05	3.41797e-06	3.61328e-05	1.66016e-05	2.92969e-06	3.41797e-05
7.8125e-06	1.75781e-05	9.76563e-05	9.27734e-06	-9.08203e-05	1.46484e-06	4.39453e-05	2.44141e-06	1.85547e-05	2.05078e-05	-2.53906e-05	5.12695e-05
8.30078e-06	1.85547e-05	7.12891e-05	1.17188e-05	-3.61328e-05	1.95313e-06	1.75781e-05	1.46484e-06	9.08203e-05	1.75781e-05	-2.24609e-05	5.37109e-05
7.32422e-06	1.75781e-05	3.22266e-05	8.78906e-06	9.57031e-05	2.19727e-06	-9.76563e-07	3.41797e-06	0.000103516	1.66016e-05	-4.88281e-06	4.39453e-05
6.83594e-06	1.5625e-05	1.95313e-05	3.90625e-06	0.000105469	1.95313e-06	-1.85547e-05	5.85938e-06	9.57031e-05	1.46484e-05	-1.26953e-05	4.15039e-05
5.37109e-06	1.5625e-05	3.71094e-05	4.88281e-06	1.17188e-05	4.15039e-06	-2.24609e-05	9.27734e-06	-6.83594e-06	1.75781e-05	-6.83594e-06	4.15039e-05
3.90625e-06	1.5625e-05	4.19922e-05	5.37109e-06	-1.66016e-05	7.56836e-06	-1.26953e-05	1.12305e-05	-8.59375e-05	1.66016e-05	-9.76563e-06	3.41797e-05
7.8125e-06	1.75781e-05	2.92969e-05	1.46484e-05	2.83203e-05	4.88281e-06	-3.90625e-06	9.76563e-06	-3.51562e-05	1.66016e-05	-2.24609e-05	3.41797e-05
7.32422e-06	1.66016e-05	1.95313e-05	1.41602e-05	5.07812e-05	4.39453e-06	3.90625e-06	6.83594e-06	0.000106445	1.75781e-05	2.63672e-05	3.66211e-05
5.85938e-06	1.66016e-05	2.34375e-05	1.02539e-05	5.17578e-05	4.39453e-06	6.83594e-06	5.85938e-06	0.000117187	1.66016e-05	6.34766e-05	4.88281e-05
3.90625e-06	1.75781e-05	2.44141e-05	6.34766e-06	6.05469e-05	3.90625e-06	1.17188e-05	4.88281e-06	-3.02734e-05	1.66016e-05	5.46875e-05	4.88281e-05
4.88281e-06	1.85547e-05	2.24609e-05	6.83594e-06	-1.75781e-05	1.95313e-06	1.36719e-05	5.37109e-06	-1.66016e-05	1.75781e-05	1.36719e-05	4.63867e-05
1.12305e-05	1.66016e-05	1.95313e-05	9.76563e-06	0.000336914	7.32422e-07	1.95313e-05	7.32422e-06	-7.8125e-06	1.26953e-05	-6.15234e-05	4.15039e-05
9.27734e-06	1.66016e-05	1.36719e-05	2.09961e-05	0.000401367	7.32422e-07	2.63672e-05	5.85938e-06	-0.000101562	1.46484e-05	-7.91016e-05	4.15039e-05
1.02539e-05	1.36719e-05	-4.88281e-06	1.31836e-05	0.000144531	2.44141e-07	2.53906e-05	5.37109e-06	-0.000210937	1.46484e-05	-3.61328e-05	3.66211e-05
1.07422e-05	1.26953e-05	1.95313e-05	-1.46484e-06	-0.000192383	2.92969e-06	2.34375e-05	6.83594e-06	-0.000170898	1.66016e-05	-5.85938e-06	4.39453e-05
7.8125e-06	1.36719e-05	7.8125e-06	-9.27734e-06	-0.000354492	2.44141e-06	2.34375e-05	5.85938e-06	-8.20313e-05	1.85547e-05	0.000115234	4.39453e-05
6.34766e-06	1.85547e-05	5.85938e-06	2.92969e-06	-0.000443359	1.95313e-06	2.44141e-05	5.37109e-06	5.85938e-06	2.14844e-05	9.76563e-05	4.39453e-05
7.8125e-06	1.95313e-05	4.88281e-06	1.26953e-05	-0.000320313	0	3.02734e-05	6.34766e-06	0.000112305	1.95313e-05	-1.95313e-05	4.15039e-05
1.02539e-05	1.66016e-05	-3.90625e-06	3.56445e-05	-0.000172852	1.46484e-06	3.41797e-05	7.32422e-06	0.000222656	1.75781e-05	-0.000120117	3.90625e-05
8.78906e-06	1.5625e-05	-2.05078e-05	1.70898e-05	-6.15234e-05	2.68555e-06	4.78516e-05	8.30078e-06	0.000245117	1.17188e-05	4.6875e-05	4.15039e-05
6.83594e-06	1.66016e-05	-9.76563e-07	4.39453e-06	2.83203e-05	6.10352e-06	0.000123047	6.34766e-06	0.000175781	1.5625e-05	0.000464844	4.88281e-05
8.30078e-06	1.5625e-05	-9.76563e-07	1.5625e-05	9.17969e-05	9.52148e-06	0.000166016	5.37109e-06	0.000176758	1.46484e-05	0.000245117	4.39453e-05
1.2207e-05	1.85547e-05	3.125e-05	1.51367e-05	0.000133789	1.24512e-05	-7.8125e-06	4.88281e-06	0.000280273	1.75781e-05	-0.000141602	4.39453e-05
4.88281e-06	1.5625e-05	3.125e-05	3.41797e-05	0.000135742	1.09863e-05	-0.000291016	5.85938e-06	0.000262695	1.46484e-05	-0.000397461	4.15039e-05
-8.78906e-06	1.46484e-05	1.95313e-05	2.63672e-05	0.000151367	9.27734e-06	-0.000231445	8.78906e-06	-6.73828e-05	1.5625e-05	-0.000268555	3.66211e-05
-1.41602e-05	1.5625e-05	2.34375e-05	1.46484e-05	0.000154297	7.32422e-06	4.49219e-05	7.8125e-06	-0.000448242	1.26953e-05	-1.26953e-05	3.17383e-05
3.90625e-06	1.75781e-05	2.83203e-05	8.30078e-06	0.000125977	8.05664e-06	0.000163086	7.8125e-06	-0.000512695	1.5625e-05	-4.29687e-05	3.66211e-05
2.88086e-05	2.14844e-05	2.53906e-05	-1.46484e-06	7.42187e-05	6.34766e-06	0.000115234	9.27734e-06	-0.000288086	1.46484e-05	-0.000163086	3.66211e-05
5.0293e-05	2.14844e-05	2.34375e-05	-5.85938e-06	1.5625e-05	3.90625e-06	0.000126953	9.27734e-06	-0.000166016	1.66016e-05	-5.07812e-05	4.15039e-05
4.6875e-05	1.95313e-05	2.63672e-05	2.92969e-06	-1.85547e-05	9.76563e-07	8.98437e-05	1.02539e-05	0.000222656	1.66016e-05	6.15234e-05	3.90625e-05
2.83203e-05	1.26953e-05	1.46484e-05	9.76563e-06	-3.90625e-05	3.17383e-06	4.88281e-05	9.76563e-06	0.000261719	1.95313e-05	4.58984e-05	4.88281e-05
2.92969e-06	7.8125e-06	-8.78906e-06	4.39453e-06	-4.6875e-05	5.37109e-06	1.5625e-05	1.26953e-05	0.000272461	1.75781e-05	0.00028418	4.88281e-05
-2.63672e-05	9.76563e-06	-9.76563e-07	2.92969e-06	-3.125e-05	3.41797e-06	-7.8125e-06	1.17188e-05	0.000392578	1.66016e-05	0.000376953	4.39453e-05
-4.54102e-05	1.26953e-05	9.76563e-06	2.92969e-06	-5.85938e-06	3.41797e-06	-8.78906e-06	1.17188e-05	0.000214844	1.5625e-05	0.000134766	4.39453e-05
-4.58984e-05	1.5625e-05	1.26953e-05	4.39453e-06	-1.75781e-05	5.12695e-06	0	1.31836e-05	0.000183594	1.46484e-05	-1.17188e-05	5.12695e-05
-3.71094e-05	1.75781e-05	1.17188e-05	7.8125e-06	-1.95313e-05	4.63867e-06	4.88281e-06	1.2207e-05	0.000318359	1.36719e-05	-2.92969e-06	5.12695e-05
-1.51367e-05	1.66016e-05	7.8125e-06	9.27734e-06	-4.88281e-06	3.17383e-06	1.95313e-06	9.76563e-06	0.000227539	1.5625e-05	0.000399414	4.63867e-05
1.5625e-05	1.46484e-05	5.85938e-06	1.17188e-05	1.95313e-06	1.2207e-06	1.36719e-05	6.83594e-06	-5.37109e-05	1.5625e-05	0.000540039	3.90625e-05
4.58984e-05	1.26953e-05	1.07422e-05	7.32422e-06	1.26953e-05	4.39453e-06	3.90625e-05	5.37109e-06	-0.000402344	1.75781e-05	0.000170898	3.66211e-05
3.56445e-05	1.75781e-05	1.46484e-05	6.34766e-06	1.75781e-05	5.37109e-06	4.78516e-05	4.88281e-06	-0.000345703	1.66016e-05	-0.000299805	3.17383e-05
-7.32422e-06	2.05078e-05	1.36719e-05	7.8125e-06	2.63672e-05	6.10352e-06	1.95313e-06	4.39453e-06	-0.000261719	1.85547e-05	-0.000426758	3.17383e-05
-9.76563e-07	2.14844e-05	1.07422e-05	1.12305e-05	4.00391e-05	6.10352e-06	-6.44531e-05	4.88281e-06	-0.000291016	2.05078e-05	-0.000249023	2.92969e-05
5.46875e-05	1.85547e-05	1.95313e-05	1.95313e-05	5.17578e-05	4.39453e-06	-5.76172e-05	9.27734e-06	-3.02734e-05	2.53906e-05	8.39844e-05	4.15039e-05
6.34766e-05	1.17188e-05	2.05078e-05	1.26953e-05	5.95703e-05	4.15039e-06	4.88281e-06	8.78906e-06	7.03125e-05	2.05078e-05	7.8125e-05	3.66211e-05
2.83203e-05	1.36719e-05	1.17188e-05	6.34766e-06	6.44531e-05	4.39453e-06	5.17578e-05	1.02539e-05	0.000147461	2.14844e-05	-6.25e-05	3.90625e-05
5.37109e-06	1.46484e-05	9.76563e-06	9.76563e-07	0.000106445	3.90625e-06	6.73828e-05	1.07422e-05	3.22266e-05	1.5625e-05	-0.000272461	4.63867e-05
-2.92969e-06	1.46484e-05	1.75781e-05	0	0.000177734	3.17383e-06	7.71484e-05	9.27734e-06	0.000107422	1.5625e-05	-0.000253906	6.34766e-05
-5.85938e-06	1.66016e-05	9.76563e-06	1.46484e-06	0.000242187	3.90625e-06	5.95703e-05	1.07422e-05	0.000160156	1.36719e-05	-0.000204102	5.61523e-05
-4.88281e-06	1.85547e-05	9.76563e-06	0	9.375e-05	2.68555e-06	3.71094e-05	1.26953e-05	0.000202148	1.5625e-05	-0.000112305	5.12695e-05
-5.85938e-06	1.85547e-05	1.36719e-05	9.76563e-07	-1.17188e-05	0	2.34375e-05	1.41602e-05	0.000350586	1.36719e-05	-6.25e-05	4.88281e-05
1.46484e-06	1.66016e-05	2.05078e-05	1.95313e-06	1.66016e-05	2.19727e-06	7.8125e-06	1.46484e-05	0.00027832	1.26953e-05	-1.95313e-06	4.39453e-05
3.41797e-06	1.36719e-05	3.125e-05	3.41797e-06	-8.78906e-05	-1.70898e-06	2.05078e-05	1.5625e-05	0.000109375	1.66016e-05	5.76172e-05	4.15039e-05
9.76563e-07	1.26953e-05	1.36719e-05	3.41797e-06	-6.25e-05	-4.15039e-06	6.54297e-05	1.31836e-05	4.10156e-05	1.75781e-05	0.000113281	4.15039e-05
7.8125e-06	1.26953e-05	1.46484e-05	2.92969e-06	3.90625e-05	-4.15039e-06	8.59375e-05	9.76563e-06	8.78906e-06	1.75781e-05	0.000134766	3.66211e-05
9.27734e-06	1.5625e-05	1.85547e-05	4.39453e-06	0.000195313	-2.92969e-06	4.58984e-05	3.41797e-06	3.32031e-05	1.66016e-05	0.000137695	4.15039e-05
7.32422e-06	1.66016e-05	2.14844e-05	6.34766e-06	0.000259766	-1.70898e-06	4.00391e-05	3.41797e-06	4.19922e-05	1.66016e-05	9.57031e-05	3.90625e-05
7.32422e-06	1.66016e-05	2.53906e-05	5.37109e-06	-2.14844e-05	-3.17383e-06	4.6875e-05	6.83594e-06	-0.000129883	1.95313e-05	4.49219e-05	4.15039e-05
1.31836e-05	1.5625e-05	2.05078e-05	4.88281e-06	-0.000208008	-2.92969e-06	0	1.95313e-06	-0.000280273	2.05078e-05	9.76563e-07	4.39453e-05
1.5625e-05	1.66016e-05	2.24609e-05	5.85938e-06	-0.000150391	-1.2207e-06	-0.000107422	2.92969e-06	-0.000269531	2.24609e-05	-1.95313e-05	4.39453e-05
1.36719e-05	1.75781e-05	2.14844e-05	8.30078e-06	-8.69141e-05	7.32422e-07	-3.51562e-05	3.41797e-06	-8.49609e-05	1.95313e-05	-5.07812e-05	3.90625e-05
1.07422e-05	1.95313e-05	2.05078e-05	6.83594e-06	-0.000117187	1.95313e-06	1.95313e-06	6.34766e-06	-4.58984e-05	1.95313e-05	-7.32422e-05	4.63867e-05
1.31836e-05	1.5625e-05	2.24609e-05	1.02539e-05	-0.000136719	3.66211e-06	-9.86328e-05	6.83594e-06	-8.49609e-05	1.66016e-05	-9.17969e-05	4.39453e-05
1.51367e-05	1.46484e-05	1.95313e-05	1.26953e-05	-8.88672e-05	5.12695e-06	-0.000130859	8.30078e-06	-6.83594e-06	1.85547e-05	-5.95703e-05	4.15039e-05
1.9043e-05	1.75781e-05	1.95313e-05	1.02539e-05	-1.26953e-05	6.10352e-06	-8.88672e-05	7.32422e-06	7.51953e-05	1.5625e-05	-7.42187e-05	4.15039e-05
1.85547e-05	1.95313e-05	2.05078e-05	7.32422e-06	5.27344e-05	6.83594e-06	5.76172e-05	1.12305e-05	9.96094e-05	1.5625e-05	-5.27344e-05	4.15039e-05
1.12305e-05	1.75781e-05	2.05078e-05	8.30078e-06	0.000112305	7.8125e-06	0.000113281	1.12305e-05	9.76563e-05	1.5625e-05	-2.83203e-05	3.66211e-05
1.02539e-05	1.5625e-05	2.24609e-05	1.02539e-05	0.000128906	9.0332e-06	5.56641e-05	1.36719e-05	8.88672e-05	1.5625e-05	-3.61328e-05	3.66211e-05
9.27734e-06	1.66016e-05	1.85547e-05	1.12305e-05	0.000113281	8.05664e-06	0.000103516	1.41602e-05	8.10547e-05	1.66016e-05	-4.29687e-05	3.90625e-05
1.07422e-05	1.66016e-05	1.46484e-05	1.07422e-05	9.08203e-05	7.08008e-06	9.76563e-05	1.36719e-05	7.8125e-05	1.75781e-05	-2.53906e-05	4.39453e-05
8.30078e-06	1.66016e-05	1.26953e-05	9.76563e-06	5.37109e-05	3.66211e-06	0.000101562	8.30078e-06	5.95703e-05	1.66016e-05	-3.32031e-05	4.39453e-05
7.32422e-06	1.66016e-05	2.73438e-05	1.2207e-05	1.17188e-05	5.12695e-06	0.000106445	6.83594e-06	3.22266e-05	1.5625e-05	-9.76563e-06	4.63867e-05
5.37109e-06	2.05078e-05	2.53906e-05	1.07422e-05	-1.85547e-05	3.41797e-06	2.24609e-05	5.37109e-06	3.51562e-05	1.46484e-05	3.02734e-05	3.90625e-05
5.85938e-06	1.95313e-05	2.05078e-05	9.76563e-06	-2.73438e-05	2.44141e-07	-9.76563e-05	6.34766e-06	5.46875e-05	1.46484e-05	2.24609e-05	3.66211e-05
5.85938e-06	1.95313e-05	1.5625e-05	1.2207e-05	6.54297e-05	2.44141e-07	-0.000105469	7.8125e-06	8.78906e-05	1.5625e-05	-3.90625e-06	3.41797e-05
4.88281e-06	1.75781e-05	1.26953e-05	1.31836e-05	4.98047e-05	2.44141e-07	-3.80859e-05	6.83594e-06	0.000136719	1.66016e-05	3.125e-05	4.15039e-05
5.85938e-06	1.66016e-05	1.46484e-05	1.02539e-05	-8.20313e-05	-9.76563e-07	2.92969e-05	5.85938e-06	0.000118164	1.66016e-05	6.73828e-05	4.15039e-05
5.85938e-06	1.17188e-05	1.75781e-05	9.76563e-06	-9.66797e-05	1.70898e-06	1.5625e-05	6.34766e-06	-4.88281e-06	1.85547e-05	0.000104492	3.90625e-05
3.90625e-06	1.17188e-05	2.05078e-05	9.27734e-06	-0.000155273	2.19727e-06	-1.85547e-05	8.78906e-06	-5.17578e-05	1.46484e-05	0.000121094	3.41797e-05
3.90625e-06	1.17188e-05	2.05078e-05	8.30078e-06	-0.000112305	2.92969e-06	-4.29687e-05	7.32422e-06	-0.000246094	1.75781e-05	0.000128906	3.41797e-05
1.95313e-06	1.46484e-05	1.85547e-05	8.78906e-06	-6.25e-05	5.61523e-06	-6.44531e-05	7.8125e-06	-0.000354492	1.66016e-05	0.00012793	3.41797e-05
4.88281e-06	1.95313e-05	1.66016e-05	9.27734e-06	-4.78516e-05	1.19629e-05	-3.02734e-05	7.32422e-06	-0.000264648	1.75781e-05	0.000125977	3.41797e-05
4.39453e-06	1.85547e-05	1.95313e-05	7.8125e-06	-1.5625e-05	1.12305e-05	5.27344e-05	7.32422e-06	-0.000155273	1.85547e-05	0.000119141	3.66211e-05
3.90625e-06	2.05078e-05	1.95313e-05	8.78906e-06	3.22266e-05	1.2207e-05	0.000102539	5.85938e-06	0.000138672	1.95313e-05	0.000121094	4.15039e-05
8.78906e-06	2.05078e-05	1.75781e-05	7.8125e-06	7.32422e-05	8.54492e-06	8.88672e-05	2.44141e-06	0.000308594	1.5625e-05	9.96094e-05	3.66211e-05
1.26953e-05	1.85547e-05	1.85547e-05	8.30078e-06	0.000108398	8.05664e-06	9.76563e-06	4.88281e-06	0.000390625	1.75781e-05	8.88672e-05	3.90625e-05
9.27734e-06	1.66016e-05	1.66016e-05	1.02539e-05	0.000112305	8.30078e-06	-9.27734e-05	5.85938e-06	0.00021582	1.46484e-05	7.91016e-05	3.90625e-05
4.88281e-06	1.5625e-05	1.66016e-05	9.76563e-06	9.47266e-05	8.30078e-06	-8.10547e-05	7.32422e-06	0	1.75781e-05	7.71484e-05	3.90625e-05
-4.39453e-06	1.5625e-05	1.36719e-05	1.02539e-05	7.03125e-05	7.8125e-06	-9.76563e-06	9.27734e-06	-0.000129883	1.5625e-05	6.73828e-05	3.90625e-05
-4.39453e-06	1.46484e-05	1.36719e-05	6.34766e-06	4.98047e-05	8.30078e-06	4.19922e-05	1.17188e-05	-1.66016e-05	1.66016e-05	6.25e-05	4.15039e-05
1.95313e-06	1.26953e-05	1.5625e-05	9.27734e-06	4.00391e-05	5.12695e-06	2.24609e-05	1.61133e-05	-0.000161133	1.66016e-05	5.85937e-05	3.90625e-05
4.88281e-06	1.75781e-05	1.75781e-05	5.85938e-06	3.41797e-05	3.41797e-06	2.63672e-05	1.9043e-05	-0.00015918	1.75781e-05	4.98047e-05	4.15039e-05
6.34766e-06	1.66016e-05	1.75781e-05	8.30078e-06	5.66406e-05	2.44141e-07	5.56641e-05	1.46484e-05	-0.000204102	1.5625e-05	2.92969e-05	3.90625e-05
6.83594e-06	1.5625e-05	1.75781e-05	6.83594e-06	7.22656e-05	-9.76563e-07	4.58984e-05	1.07422e-05	-0.000263672	1.66016e-05	2.44141e-05	4.15039e-05
1.02539e-05	1.46484e-05	1.95313e-05	7.8125e-06	5.17578e-05	-1.2207e-06	3.90625e-05	7.32422e-06	-0.000125	1.85547e-05	2.34375e-05	3.66211e-05
1.07422e-05	1.36719e-05	1.75781e-05	6.83594e-06	-6.83594e-06	-1.2207e-06	3.41797e-05	6.34766e-06	9.76563e-06	1.66016e-05	3.41797e-05	4.39453e-05
1.26953e-05	1.5625e-05	1.85547e-05	1.46484e-05	-2.92969e-05	-2.44141e-06	3.51562e-05	2.92969e-06	0.000182617	1.5625e-05	2.92969e-05	4.63867e-05
1.36719e-05	1.75781e-05	1.75781e-05	1.12305e-05	-2.92969e-05	-2.44141e-07	4.78516e-05	9.76563e-07	0.000375977	1.85547e-05	3.22266e-05	4.63867e-05
1.2207e-05	1.5625e-05	1.5625e-05	7.32422e-06	-7.8125e-06	2.19727e-06	4.29687e-05	3.41797e-06	0.000317383	1.75781e-05	2.53906e-05	4.15039e-05
5.37109e-06	1.66016e-05	1.46484e-05	5.85938e-06	1.75781e-05	4.63867e-06	4.10156e-05	5.85938e-06	-7.91016e-05	1.75781e-05	2.44141e-05	4.15039e-05
1.46484e-06	1.5625e-05	1.17188e-05	7.8125e-06	4.00391e-05	4.15039e-06	5.46875e-05	5.85938e-06	-0.000285156	1.26953e-05	1.5625e-05	3.90625e-05
4.88281e-07	1.5625e-05	1.66016e-05	8.30078e-06	3.90625e-05	4.39453e-06	2.92969e-05	7.32422e-06	-0.000238281	1.75781e-05	1.5625e-05	4.15039e-05
1.95313e-06	1.75781e-05	2.05078e-05	7.32422e-06	9.76563e-07	1.46484e-06	-1.36719e-05	7.8125e-06	2.92969e-05	1.36719e-05	6.83594e-06	3.90625e-05
7.8125e-06	1.66016e-05	1.66016e-05	8.78906e-06	2.14844e-05	-2.44141e-07	-7.71484e-05	6.83594e-06	0.000523438	1.85547e-05	-1.75781e-05	4.39453e-05
8.78906e-06	1.46484e-05	1.5625e-05	8.78906e-06	0.000208984	2.19727e-06	-5.66406e-05	7.8125e-06	0.000799805	1.66016e-05	-8.59375e-05	4.15039e-05
9.27734e-06	1.46484e-05	1.36719e-05	7.32422e-06	0.000193359	1.2207e-06	1.17188e-05	8.30078e-06	0.000461914	2.05078e-05	-0.000117187	4.63867e-05
1.07422e-05	1.46484e-05	1.36719e-05	8.78906e-06	-3.90625e-05	-7.32422e-07	8.69141e-05	8.30078e-06	-4.78516e-05	2.14844e-05	-9.17969e-05	3.66211e-05
9.76563e-06	1.5625e-05	1.5625e-05	8.30078e-06	-0.000239258	-1.2207e-06	3.51562e-05	8.30078e-06	-0.000506836	2.24609e-05	3.71094e-05	3.41797e-05
9.27734e-06	1.36719e-05	1.66016e-05	8.30078e-06	-0.000174805	-3.90625e-06	8.78906e-06	9.27734e-06	-0.000633789	2.14844e-05	0.000216797	3.41797e-05
8.78906e-06	1.36719e-05	1.5625e-05	9.27734e-06	-5.76172e-05	4.39453e-06	9.96094e-05	8.78906e-06	-0.000408203	2.05078e-05	0.000272461	4.15039e-05
8.78906e-06	1.5625e-05	1.75781e-05	8.78906e-06	3.90625e-06	4.39453e-06	8.10547e-05	6.83594e-06	-0.000113281	1.75781e-05	0.000216797	3.66211e-05
7.32422e-06	1.46484e-05	1.5625e-05	9.27734e-06	6.83594e-06	5.37109e-06	-1.95313e-06	8.30078e-06	9.08203e-05	1.95313e-05	0.000537109	3.41797e-05
7.8125e-06	1.75781e-05	1.75781e-05	7.8125e-06	1.75781e-05	6.10352e-06	-2.53906e-05	7.8125e-06	0.00015625	1.5625e-05	0.000212891	3.41797e-05
8.30078e-06	1.66016e-05	1.5625e-05	8.30078e-06	6.25e-05	4.88281e-06	-3.125e-05	8.78906e-06	0.000102539	1.5625e-05	-0.000155273	3.90625e-05
1.02539e-05	1.66016e-05	1.46484e-05	6.83594e-06	8.69141e-05	5.61523e-06	-1.46484e-05	7.32422e-06	3.02734e-05	1.36719e-05	-6.83594e-06	3.90625e-05
9.27734e-06	1.46484e-05	1.46484e-05	4.88281e-06	8.49609e-05	7.8125e-06	-4.39453e-05	5.85938e-06	-9.76563e-07	1.5625e-05	0.000118164	4.63867e-05
1.02539e-05	1.66016e-05	1.36719e-05	8.78906e-06	7.51953e-05	6.5918e-06	-9.66797e-05	5.85938e-06	4.00391e-05	1.36719e-05	-0.000203125	4.88281e-05
7.8125e-06	1.66016e-05	1.5625e-05	1.17188e-05	5.37109e-05	6.83594e-06	-3.71094e-05	8.30078e-06	8.00781e-05	1.66016e-05	-0.000337891	5.12695e-05
8.30078e-06	1.66016e-05	1.36719e-05	1.26953e-05	3.02734e-05	2.92969e-06	7.03125e-05	8.30078e-06	0.000106445	1.5625e-05	-0.000318359	5.12695e-05
8.78906e-06	1.66016e-05	1.5625e-05	9.27734e-06	7.8125e-06	1.95313e-06	8.00781e-05	8.78906e-06	5.07812e-05	1.85547e-05	-0.000217773	5.37109e-05
7.32422e-06	1.5625e-05	1.66016e-05	7.8125e-06	1.5625e-05	-7.32422e-07	0.000117187	1.2207e-05	0.000175781	1.85547e-05	-0.000132813	4.88281e-05
8.78906e-06	1.66016e-05	1.5625e-05	5.85938e-06	1.36719e-05	-9.76563e-07	9.27734e-05	1.26953e-05	0.000226563	2.14844e-05	-5.95703e-05	4.39453e-05
8.78906e-06	1.5625e-05	1.46484e-05	7.32422e-06	-3.90625e-05	7.32422e-07	9.76563e-05	1.26953e-05	0.000146484	1.75781e-05	5.85938e-06	3.17383e-05
9.27734e-06	1.5625e-05	1.46484e-05	7.8125e-06	-0.000110352	7.32422e-07	5.66406e-05	1.31836e-05	6.34766e-05	1.85547e-05	-3.41797e-05	3.66211e-05
9.27734e-06	1.5625e-05	1.26953e-05	7.8125e-06	6.54297e-05	-2.44141e-07	7.51953e-05	1.26953e-05	2.34375e-05	1.5625e-05	8.78906e-06	4.63867e-05
9.27734e-06	1.5625e-05	1.5625e-05	8.30078e-06	0.00022168	2.44141e-06	4.6875e-05	1.2207e-05	-1.95313e-05	1.5625e-05	8.88672e-05	4.39453e-05
8.30078e-06	1.66016e-05	1.46484e-05	7.8125e-06	3.90625e-05	4.15039e-06	3.22266e-05	1.07422e-05	-5.85938e-06	1.26953e-05	0.000113281	3.90625e-05
9.76563e-06	1.75781e-05	1.75781e-05	7.8125e-06	-0.000131836	4.63867e-06	3.90625e-05	1.07422e-05	4.58984e-05	1.26953e-05	5.85937e-05	4.15039e-05
1.07422e-05	1.66016e-05	1.75781e-05	8.30078e-06	-0.000102539	5.85938e-06	7.12891e-05	7.32422e-06	0.000132813	1.66016e-05	0.000249023	3.90625e-05
1.07422e-05	1.75781e-05	1.66016e-05	8.30078e-06	-2.83203e-05	7.56836e-06	-1.17188e-05	4.39453e-06	0.000146484	2.05078e-05	0.000396484	3.66211e-05
9.76563e-06	1.5625e-05	1.66016e-05	9.27734e-06	0.000109375	7.56836e-06	-0.00022168	2.44141e-06	2.34375e-05	2.05078e-05	0.000280273	3.66211e-05
9.27734e-06	1.66016e-05	1.5625e-05	8.78906e-06	0.000164063	5.85938e-06	-0.000161133	4.88281e-06	-9.86328e-05	1.85547e-05	-8.78906e-06	3.66211e-05
6.83594e-06	1.75781e-05	1.46484e-05	7.8125e-06	1.66016e-05	4.88281e-06	-1.95313e-05	2.92969e-06	-0.000141602	1.75781e-05	-9.375e-05	3.17383e-05
9.76563e-06	1.75781e-05	1.46484e-05	8.30078e-06	-9.96094e-05	6.5918e-06	-6.83594e-05	2.92969e-06	-0.000148437	1.85547e-05	-8.00781e-05	3.90625e-05
8.78906e-06	1.66016e-05	1.75781e-05	8.78906e-06	-5.46875e-05	5.85938e-06	2.63672e-05	6.34766e-06	-0.000163086	1.66016e-05	-0.000192383	5.37109e-05
1.17188e-05	1.66016e-05	1.46484e-05	8.78906e-06	7.8125e-06	5.61523e-06	0.00012793	6.83594e-06	-0.00015625	1.5625e-05	-0.000313477	6.34766e-05
8.78906e-06	1.5625e-05	1.36719e-05	8.30078e-06	8.49609e-05	1.2207e-06	0.00015625	9.27734e-06	-1.17188e-05	1.46484e-05	-0.000296875	5.85937e-05
9.27734e-06	1.5625e-05	1.46484e-05	7.8125e-06	8.98437e-05	4.39453e-06	0.000100586	1.2207e-05	0.000101562	1.36719e-05	-0.000195313	5.37109e-05
7.8125e-06	1.5625e-05	1.26953e-05	7.8125e-06	3.90625e-05	2.19727e-06	8.69141e-05	1.51367e-05	0.000224609	1.36719e-05	-0.000120117	4.88281e-05
8.30078e-06	1.75781e-05	1.07422e-05	6.83594e-06	3.80859e-05	5.12695e-06	9.27734e-05	1.70898e-05	0.000216797	1.5625e-05	-4.39453e-05	4.39453e-05
6.83594e-06	1.85547e-05	1.36719e-05	8.78906e-06	4.98047e-05	1.70898e-06	0.000109375	1.5625e-05	0.00022168	1.75781e-05	0	3.90625e-05
4.39453e-06	1.5625e-05	1.46484e-05	7.8125e-06	8.49609e-05	2.92969e-06	-4.88281e-06	1.51367e-05	0.000104492	1.75781e-05	9.76563e-06	4.39453e-05
3.41797e-06	1.85547e-05	1.46484e-05	9.27734e-06	2.83203e-05	3.41797e-06	-5.27344e-05	1.12305e-05	6.05469e-05	1.75781e-05	2.63672e-05	3.90625e-05
5.37109e-06	1.5625e-05	1.75781e-05	9.27734e-06	-5.46875e-05	3.66211e-06	-2.05078e-05	1.12305e-05	-0.000107422	2.14844e-05	4.10156e-05	4.15039e-05
4.88281e-06	1.66016e-05	1.75781e-05	9.27734e-06	-4.19922e-05	5.61523e-06	2.92969e-06	7.8125e-06	-0.000222656	1.75781e-05	4.19922e-05	4.15039e-05
1.12305e-05	1.5625e-05	1.95313e-05	8.30078e-06	-5.46875e-05	4.15039e-06	3.22266e-05	4.88281e-06	-0.000203125	1.75781e-05	4.19922e-05	4.15039e-05
2.24609e-05	1.46484e-05	1.75781e-05	9.27734e-06	-0.000117187	3.90625e-06	4.39453e-05	1.95313e-06	-1.36719e-05	1.5625e-05	3.32031e-05	3.90625e-05
1.95313e-05	1.5625e-05	1.95313e-05	8.30078e-06	-5.17578e-05	4.88281e-06	-1.46484e-05	6.83594e-06	0.000109375	1.85547e-05	2.92969e-05	4.15039e-05
1.95313e-06	1.75781e-05	1.85547e-05	7.8125e-06	8.78906e-06	2.92969e-06	-8.69141e-05	8.78906e-06	8.30078e-05	1.5625e-05	2.63672e-05	3.66211e-05
-1.66016e-05	1.75781e-05	1.75781e-05	8.78906e-06	3.32031e-05	2.92969e-06	-8.78906e-05	6.83594e-06	0.000132813	1.85547e-05	2.83203e-05	4.15039e-05
-1.9043e-05	1.66016e-05	1.46484e-05	7.8125e-06	6.05469e-05	3.41797e-06	-1.36719e-05	5.37109e-06	0.000119141	1.85547e-05	2.34375e-05	3.90625e-05
1.51367e-05	1.75781e-05	1.5625e-05	8.30078e-06	9.17969e-05	2.44141e-06	6.05469e-05	5.37109e-06	9.08203e-05	1.75781e-05	4.29687e-05	4.39453e-05
5.76172e-05	1.75781e-05	1.46484e-05	7.8125e-06	7.12891e-05	3.90625e-06	8.49609e-05	4.39453e-06	0.000100586	1.46484e-05	5.46875e-05	4.39453e-05
3.125e-05	1.5625e-05	9.76563e-06	7.8125e-06	6.44531e-05	7.08008e-06	5.95703e-05	7.32422e-06	-4.10156e-05	1.46484e-05	-2.92969e-06	4.63867e-05
9.76563e-07	1.46484e-05	1.26953e-05	8.78906e-06	5.95703e-05	5.85938e-06	5.76172e-05	7.8125e-06	-6.54297e-05	1.46484e-05	-4.29687e-05	4.15039e-05
-1.66016e-05	1.46484e-05	1.5625e-05	8.78906e-06	4.6875e-05	4.39453e-06	4.39453e-05	8.30078e-06	4.78516e-05	1.85547e-05	-4.58984e-05	4.15039e-05
-2.7832e-05	1.5625e-05	1.75781e-05	7.8125e-06	-2.83203e-05	4.63867e-06	0.000155273	1.02539e-05	3.80859e-05	1.5625e-05	-2.63672e-05	3.41797e-05
-4.15039e-05	1.75781e-05	1.85547e-05	8.78906e-06	-0.000170898	2.68555e-06	0.00025	9.76563e-06	-5.66406e-05	1.85547e-05	2.83203e-05	3.90625e-05
-3.51562e-05	1.5625e-05	1.95313e-05	7.8125e-06	-5.46875e-05	3.66211e-06	7.42187e-05	1.07422e-05	-0.000134766	1.85547e-05	7.51953e-05	3.90625e-05
8.78906e-06	1.66016e-05	1.75781e-05	9.76563e-06	6.93359e-05	4.88281e-06	-0.000101562	6.34766e-06	-0.000189453	1.95313e-05	0.000141602	3.90625e-05
3.90625e-05	1.85547e-05	1.5625e-05	7.32422e-06	9.17969e-05	5.37109e-06	-0.000280273	1.46484e-06	-3.02734e-05	1.85547e-05	0.000154297	3.90625e-05
6.10352e-05	1.85547e-05	2.05078e-05	7.32422e-06	6.44531e-05	3.17383e-06	-0.000400391	2.44141e-06	0.000115234	1.75781e-05	8.49609e-05	4.15039e-05
6.98242e-05	1.95313e-05	2.05078e-05	9.27734e-06	6.34766e-05	4.63867e-06	-0.00021582	5.37109e-06	9.57031e-05	1.5625e-05	8.78906e-05	3.90625e-05
6.00586e-05	1.66016e-05	1.85547e-05	8.78906e-06	7.03125e-05	4.15039e-06	6.54297e-05	5.37109e-06	0.000136719	1.85547e-05	9.17969e-05	3.90625e-05
2.68555e-05	1.46484e-05	1.95313e-05	8.78906e-06	5.56641e-05	4.63867e-06	0.000160156	6.34766e-06	1.5625e-05	1.75781e-05	4.88281e-05	3.66211e-05
9.76563e-06	1.5625e-05	1.75781e-05	7.8125e-06	2.44141e-05	6.34766e-06	0.000133789	5.37109e-06	-0.000195313	1.85547e-05	2.63672e-05	3.90625e-05
-4.39453e-06	1.36719e-05	1.36719e-05	7.8125e-06	-1.75781e-05	3.66211e-06	0.00015332	1.02539e-05	-0.000329102	1.66016e-05	1.46484e-05	3.90625e-05
-1.41602e-05	1.46484e-05	7.8125e-06	9.76563e-06	-2.63672e-05	3.90625e-06	0.000146484	1.36719e-05	-0.00024707	1.66016e-05	1.5625e-05	3.90625e-05
-1.5625e-05	1.36719e-05	8.78906e-06	1.02539e-05	-1.26953e-05	1.46484e-06	5.85937e-05	1.61133e-05	-0.000176758	1.5625e-05	1.17188e-05	3.90625e-05
-1.07422e-05	1.46484e-05	1.5625e-05	7.8125e-06	9.76563e-06	9.76563e-07	0.000263672	1.61133e-05	-0.000100586	1.66016e-05	7.8125e-06	4.15039e-05
-7.8125e-06	1.66016e-05	1.95313e-05	7.8125e-06	2.63672e-05	1.46484e-06	8.59375e-05	1.2207e-05	6.83594e-06	1.46484e-05	4.88281e-05	3.41797e-05
-1.36719e-05	2.05078e-05	2.05078e-05	7.32422e-06	6.83594e-06	1.95313e-06	-0.000170898	1.12305e-05	0.000110352	1.75781e-05	7.91016e-05	3.90625e-05
-1.95313e-05	1.66016e-05	2.05078e-05	7.32422e-06	-1.66016e-05	1.95313e-06	-0.000186523	6.83594e-06	0.000201172	1.66016e-05	1.07422e-05	3.90625e-05
-7.32422e-06	1.5625e-05	2.05078e-05	9.27734e-06	-8.78906e-06	2.44141e-06	-0.000170898	2.92969e-06	0.000231445	1.5625e-05	0.000241211	3.90625e-05
1.95313e-05	1.66016e-05	1.85547e-05	9.27734e-06	1.46484e-05	1.70898e-06	-6.44531e-05	3.90625e-06	0.000320313	1.36719e-05	0.000466797	3.90625e-05
2.97852e-05	1.66016e-05	1.75781e-05	9.27734e-06	2.92969e-05	7.32422e-07	2.53906e-05	4.39453e-06	0.000351562	1.46484e-05	-1.26953e-05	3.90625e-05
2.63672e-05	1.5625e-05	1.85547e-05	8.30078e-06	3.22266e-05	-2.44141e-07	4.10156e-05	3.41797e-06	0.000173828	1.26953e-05	-0.000250977	3.17383e-05
3.90625e-05	1.75781e-05	1.5625e-05	6.34766e-06	3.71094e-05	2.92969e-06	-5.56641e-05	8.30078e-06	-1.85547e-05	1.46484e-05	-0.000149414	4.15039e-05
4.44336e-05	1.5625e-05	1.66016e-05	9.27734e-06	5.17578e-05	4.88281e-06	-1.85547e-05	1.17188e-05	-0.000194336	1.17188e-05	7.32422e-05	4.15039e-05
-2.92969e-06	1.46484e-05	1.46484e-05	9.27734e-06	5.07812e-05	9.27734e-06	1.5625e-05	1.26953e-05	-0.00021875	1.66016e-05	9.47266e-05	3.66211e-05
-1.80664e-05	1.26953e-05	1.66016e-05	8.30078e-06	4.19922e-05	6.10352e-06	3.80859e-05	1.41602e-05	-0.000163086	2.05078e-05	-0.000113281	3.17383e-05
2.00195e-05	1.5625e-05	1.66016e-05	1.85547e-05	3.32031e-05	4.15039e-06	4.49219e-05	1.02539e-05	-0.000158203	2.24609e-05	-0.000158203	3.90625e-05
2.19727e-05	1.26953e-05	1.66016e-05	2.24609e-05	2.83203e-05	3.41797e-06	4.49219e-05	7.8125e-06	-0.000260742	1.95313e-05	-1.07422e-05	4.15039e-05
1.36719e-05	1.5625e-05	1.66016e-05	4.88281e-07	2.53906e-05	1.46484e-06	3.32031e-05	6.83594e-06	-0.000160156	2.34375e-05	1.75781e-05	4.88281e-05
1.12305e-05	1.5625e-05	1.5625e-05	-2.44141e-06	1.95313e-05	7.32422e-07	2.05078e-05	7.32422e-06	-3.32031e-05	1.75781e-05	8.88672e-05	4.63867e-05
9.76563e-06	1.85547e-05	1.75781e-05	9.76563e-07	6.83594e-06	2.44141e-07	1.26953e-05	8.30078e-06	0.000105469	1.66016e-05	0.000119141	4.63867e-05
9.27734e-06	1.75781e-05	1.5625e-05	5.85938e-06	-6.83594e-06	9.76563e-07	-1.95313e-06	8.30078e-06	0.000174805	1.46484e-05	8.20313e-05	4.63867e-05
2.44141e-06	1.5625e-05	1.66016e-05	7.32422e-06	-1.36719e-05	7.32422e-07	-7.8125e-06	7.8125e-06	8.98437e-05	1.46484e-05	6.15234e-05	4.63867e-05
-9.76563e-07	1.46484e-05	1.66016e-05	8.78906e-06	-2.05078e-05	-2.44141e-07	8.78906e-06	9.76563e-06	0.000118164	1.5625e-05	6.44531e-05	4.63867e-05
1.95313e-06	1.5625e-05	1.66016e-05	1.02539e-05	-1.26953e-05	1.95313e-06	1.07422e-05	1.02539e-05	0.000207031	1.95313e-05	9.375e-05	4.39453e-05
2.44141e-06	1.66016e-05	1.66016e-05	1.31836e-05	0.000124023	1.95313e-06	7.8125e-06	9.27734e-06	0.000136719	1.75781e-05	4.98047e-05	3.90625e-05
9.76563e-07	1.85547e-05	1.26953e-05	9.76563e-06	0.000101562	1.95313e-06	1.17188e-05	1.07422e-05	2.63672e-05	1.17188e-05	1.07422e-05	4.15039e-05
9.76563e-07	1.75781e-05	1.36719e-05	9.76563e-06	-1.85547e-05	1.70898e-06	1.07422e-05	8.30078e-06	-2.92969e-06	1.36719e-05	-5.85937e-05	3.90625e-05
4.88281e-07	1.5625e-05	1.36719e-05	5.85938e-06	-3.32031e-05	3.41797e-06	1.07422e-05	7.8125e-06	2.83203e-05	1.5625e-05	-7.91016e-05	4.15039e-05
3.41797e-06	1.46484e-05	1.36719e-05	5.85938e-06	-0.000115234	0	9.76563e-06	4.88281e-06	5.76172e-05	1.85547e-05	-7.51953e-05	3.90625e-05
3.41797e-06	1.5625e-05	1.26953e-05	1.07422e-05	-0.000201172	-9.76563e-07	8.78906e-06	5.85938e-06	3.22266e-05	1.85547e-05	-5.46875e-05	3.90625e-05
5.37109e-06	1.36719e-05	8.78906e-06	1.51367e-05	-0.000258789	-7.32422e-07	1.75781e-05	9.27734e-06	-1.75781e-05	1.75781e-05	-5.37109e-05	3.90625e-05
4.39453e-06	1.66016e-05	7.8125e-06	1.66016e-05	0.000111328	2.44141e-06	3.125e-05	9.76563e-06	-0.000101562	1.95313e-05	-5.76172e-05	4.39453e-05
6.83594e-06	1.5625e-05	1.17188e-05	1.61133e-05	0.000375977	3.17383e-06	4.00391e-05	1.26953e-05	-0.000249023	1.85547e-05	-4.88281e-05	4.39453e-05
7.8125e-06	1.95313e-05	1.66016e-05	1.17188e-05	0.000282227	5.85938e-06	4.78516e-05	1.26953e-05	-0.000201172	1.66016e-05	-3.61328e-05	5.12695e-05
7.32422e-06	1.66016e-05	2.83203e-05	2.44141e-06	-7.71484e-05	3.90625e-06	3.90625e-05	8.78906e-06	2.44141e-05	1.75781e-05	9.66797e-05	4.15039e-05
7.8125e-06	1.66016e-05	2.92969e-05	-3.90625e-06	-0.000205078	5.37109e-06	3.22266e-05	9.76563e-06	0.000102539	2.14844e-05	0.000249023	4.15039e-05
6.83594e-06	1.66016e-05	3.22266e-05	-4.88281e-06	-0.000121094	4.88281e-06	3.125e-05	7.8125e-06	0.000115234	1.5625e-05	0.000271484	3.90625e-05
4.88281e-06	1.75781e-05	3.32031e-05	-5.85938e-06	1.36719e-05	6.83594e-06	3.22266e-05	5.37109e-06	0.000256836	1.75781e-05	0.000299805	3.66211e-05
5.85938e-06	1.66016e-05	2.53906e-05	2.44141e-06	8.49609e-05	7.32422e-06	3.22266e-05	4.39453e-06	0.000181641	1.66016e-05	4.39453e-05	3.41797e-05
4.39453e-06	1.75781e-05	1.46484e-05	8.78906e-06	9.66797e-05	9.76563e-06	3.02734e-05	5.85938e-06	-1.85547e-05	1.75781e-05	-0.000163086	3.90625e-05
5.85938e-06	1.95313e-05	9.76563e-06	1.17188e-05	5.95703e-05	6.5918e-06	2.53906e-05	6.34766e-06	8.69141e-05	1.85547e-05	-0.000240234	4.15039e-05
5.37109e-06	1.75781e-05	1.95313e-06	1.61133e-05	6.83594e-06	6.10352e-06	4.88281e-06	6.34766e-06	0.000329102	1.85547e-05	-0.000168945	4.63867e-05
6.83594e-06	1.75781e-05	1.46484e-05	7.8125e-06	-6.83594e-06	5.61523e-06	1.66016e-05	5.85938e-06	0.000230469	1.66016e-05	-6.73828e-05	4.15039e-05
4.39453e-06	1.75781e-05	1.75781e-05	5.85938e-06	9.76563e-07	4.15039e-06	3.61328e-05	5.37109e-06	-0.000125	1.75781e-05	-4.88281e-06	4.39453e-05
3.41797e-06	1.36719e-05	1.17188e-05	1.02539e-05	1.36719e-05	3.41797e-06	4.29687e-05	8.78906e-06	-0.000398437	1.75781e-05	3.51562e-05	4.39453e-05
6.83594e-06	1.66016e-05	9.76563e-06	1.31836e-05	3.80859e-05	3.17383e-06	4.29687e-05	9.27734e-06	-0.000376953	1.75781e-05	-9.17969e-05	5.12695e-05
7.32422e-06	1.85547e-05	9.76563e-06	1.02539e-05	6.44531e-05	3.90625e-06	4.19922e-05	8.78906e-06	-0.000121094	1.5625e-05	-0.000172852	5.61523e-05
7.32422e-06	1.66016e-05	1.5625e-05	8.78906e-06	6.25e-05	3.17383e-06	3.71094e-05	7.32422e-06	0.000113281	1.66016e-05	-0.000112305	5.61523e-05
7.32422e-06	1.5625e-05	1.95313e-05	9.27734e-06	9.76563e-07	1.2207e-06	2.92969e-05	6.83594e-06	0.000272461	1.36719e-05	-2.63672e-05	4.88281e-05
8.78906e-06	1.36719e-05	2.24609e-05	6.34766e-06	6.05469e-05	1.70898e-06	2.44141e-05	8.30078e-06	0.000328125	1.66016e-05	8.20313e-05	4.39453e-05
7.32422e-06	1.36719e-05	2.34375e-05	5.85938e-06	0.000107422	4.88281e-07	2.44141e-05	7.8125e-06	0.00031543	1.66016e-05	0.000196289	3.66211e-05
5.85938e-06	1.75781e-05	2.53906e-05	4.88281e-06	-3.90625e-06	1.95313e-06	3.125e-05	1.02539e-05	0.000134766	1.85547e-05	0.000458984	2.92969e-05
5.85938e-06	2.05078e-05	2.24609e-05	7.32422e-06	-4.6875e-05	4.15039e-06	4.29687e-05	6.83594e-06	-2.63672e-05	1.75781e-05	0.00031543	2.19727e-05
6.83594e-06	1.75781e-05	2.44141e-05	6.34766e-06	3.90625e-06	6.10352e-06	3.02734e-05	3.41797e-06	-0.000113281	1.95313e-05	4.6875e-05	2.68555e-05
9.76563e-06	1.46484e-05	2.14844e-05	1.95313e-06	4.98047e-05	7.56836e-06	-5.85938e-06	4.39453e-06	-6.54297e-05	1.5625e-05	-5.85937e-05	3.17383e-05
9.27734e-06	1.46484e-05	1.46484e-05	3.90625e-06	3.125e-05	7.8125e-06	-2.83203e-05	1.07422e-05	2.83203e-05	1.46484e-05	-5.56641e-05	3.90625e-05
7.32422e-06	1.75781e-05	1.17188e-05	4.88281e-06	-6.83594e-06	9.76563e-06	3.02734e-05	1.07422e-05	0.000102539	1.36719e-05	-0.00015625	4.15039e-05
8.78906e-06	1.66016e-05	1.17188e-05	2.44141e-06	-3.80859e-05	9.52148e-06	0.000147461	9.27734e-06	0.000126953	1.75781e-05	-0.000245117	4.63867e-05
9.27734e-06	1.5625e-05	1.46484e-05	9.76563e-06	-4.29687e-05	6.34766e-06	0.000160156	7.8125e-06	0.000121094	1.66016e-05	-0.000194336	4.63867e-05
7.8125e-06	1.75781e-05	1.85547e-05	1.36719e-05	-4.10156e-05	4.15039e-06	-0.000103516	6.83594e-06	0.00019043	1.85547e-05	-9.96094e-05	5.12695e-05
8.30078e-06	1.75781e-05	3.22266e-05	8.78906e-06	-2.92969e-05	4.15039e-06	-0.000363281	9.27734e-06	0.000140625	1.5625e-05	-9.17969e-05	5.12695e-05
8.30078e-06	1.5625e-05	7.8125e-06	2.92969e-06	-9.27734e-05	3.66211e-06	-0.000172852	9.27734e-06	-2.05078e-05	1.46484e-05	-0.000128906	5.37109e-05
8.78906e-06	1.66016e-05	1.36719e-05	2.34375e-05	2.73438e-05	7.08008e-06	0.000119141	1.17188e-05	-0.000222656	1.36719e-05	-0.000106445	5.12695e-05
7.8125e-06	1.95313e-05	2.05078e-05	1.51367e-05	0.000166016	7.08008e-06	0.000214844	7.8125e-06	-0.000427734	1.5625e-05	1.95313e-05	4.88281e-05
7.8125e-06	1.85547e-05	7.8125e-06	4.88281e-07	0.000103516	2.44141e-06	0.000137695	5.85938e-06	-0.000189453	1.75781e-05	2.05078e-05	3.90625e-05
1.36719e-05	1.36719e-05	1.95313e-05	5.37109e-06	9.76563e-07	0	0.000121094	6.83594e-06	0.000154297	1.95313e-05	-0.000100586	3.17383e-05
1.2207e-05	1.26953e-05	9.76563e-07	8.78906e-06	-1.17188e-05	7.32422e-07	5.37109e-05	1.02539e-05	0.000238281	1.66016e-05	-5.66406e-05	3.66211e-05
9.27734e-06	1.26953e-05	2.34375e-05	1.26953e-05	1.17188e-05	1.2207e-06	-3.90625e-06	1.17188e-05	0.00031543	1.66016e-05	0.000200195	4.15039e-05
8.30078e-06	1.5625e-05	3.125e-05	2.14844e-05	3.32031e-05	2.92969e-06	-3.32031e-05	1.07422e-05	0.000251953	1.5625e-05	0.000311523	4.15039e-05
7.8125e-06	1.95313e-05	1.95313e-06	1.02539e-05	2.44141e-05	2.44141e-06	-2.92969e-05	8.30078e-06	-0.000203125	1.85547e-05	0.000207031	4.39453e-05
8.30078e-06	1.5625e-05	8.78906e-06	7.8125e-06	-6.83594e-06	2.92969e-06	-9.76563e-06	5.85938e-06	-0.000402344	1.46484e-05	0.000121094	4.15039e-05
1.02539e-05	1.46484e-05	-4.88281e-06	3.22266e-05	-1.95313e-05	9.76563e-07	4.88281e-06	6.83594e-06	-0.000289062	1.46484e-05	-1.75781e-05	4.39453e-05
1.12305e-05	1.46484e-05	3.90625e-06	2.34375e-05	-4.98047e-05	-1.2207e-06	1.95313e-05	3.90625e-06	-8.69141e-05	1.85547e-05	-0.000110352	3.90625e-05
8.30078e-06	1.36719e-05	1.95313e-05	7.32422e-06	-8.59375e-05	-1.70898e-06	3.125e-05	5.37109e-06	0.000188477	1.75781e-05	-0.000147461	4.39453e-05
9.27734e-06	1.26953e-05	2.14844e-05	-3.90625e-06	9.86328e-05	1.2207e-06	7.8125e-06	9.27734e-06	0.000181641	1.85547e-05	-0.000136719	4.15039e-05
8.30078e-06	1.66016e-05	2.63672e-05	3.41797e-06	0.0001875	7.32422e-06	4.6875e-05	1.26953e-05	0.000169922	1.95313e-05	-3.41797e-05	3.90625e-05
8.30078e-06	1.95313e-05	2.34375e-05	1.31836e-05	-7.8125e-06	3.17383e-06	0.000108398	9.27734e-06	0.000302734	1.95313e-05	-0.000161133	3.90625e-05
8.78906e-06	2.05078e-05	7.8125e-06	6.83594e-06	-0.000101562	3.41797e-06	1.17188e-05	7.8125e-06	0.000244141	2.05078e-05	-3.02734e-05	4.88281e-05
9.27734e-06	1.75781e-05	8.78906e-06	3.90625e-06	-4.88281e-05	3.17383e-06	-0.000129883	6.34766e-06	0.000135742	1.75781e-05	1.95313e-05	3.90625e-05
7.8125e-06	2.05078e-05	8.78906e-06	8.30078e-06	3.90625e-06	1.70898e-06	-0.000104492	6.83594e-06	-0.000123047	1.95313e-05	-0.000139648	3.17383e-05
8.30078e-06	1.75781e-05	1.17188e-05	1.07422e-05	1.5625e-05	1.46484e-06	-2.14844e-05	6.34766e-06	-0.000385742	1.46484e-05	-0.000132813	2.92969e-05
1.07422e-05	1.36719e-05	1.46484e-05	1.46484e-05	3.90625e-06	2.92969e-06	1.95313e-05	8.30078e-06	-0.000413086	1.5625e-05	5.85937e-05	4.15039e-05
1.07422e-05	1.66016e-05	1.5625e-05	1.70898e-05	5.66406e-05	4.15039e-06	0.000181641	7.32422e-06	-0.000237305	1.26953e-05	0.000256836	3.90625e-05
8.78906e-06	1.5625e-05	1.66016e-05	1.17188e-05	7.03125e-05	5.12695e-06	4.98047e-05	4.88281e-06	4.58984e-05	1.36719e-05	0.000356445	3.66211e-05
9.76563e-06	1.46484e-05	1.5625e-05	1.12305e-05	-1.36719e-05	5.37109e-06	-0.000148437	4.88281e-06	0.000358398	1.5625e-05	0.000370117	3.17383e-05
9.76563e-06	1.07422e-05	1.5625e-05	1.02539e-05	-7.51953e-05	1.95313e-06	-8.88672e-05	8.30078e-06	0.000257813	1.46484e-05	0.000332031	3.90625e-05
8.30078e-06	1.36719e-05	1.5625e-05	9.27734e-06	-2.73438e-05	1.95313e-06	5.95703e-05	1.17188e-05	6.25e-05	1.66016e-05	0.000124023	4.39453e-05
9.27734e-06	1.66016e-05	1.46484e-05	8.78906e-06	5.07812e-05	1.95313e-06	0.000140625	1.61133e-05	-6.83594e-06	1.66016e-05	1.66016e-05	4.39453e-05
7.8125e-06	1.75781e-05	1.26953e-05	6.83594e-06	7.32422e-05	2.68555e-06	8.10547e-05	1.80664e-05	-0.000176758	1.85547e-05	4.10156e-05	4.15039e-05
6.34766e-06	1.66016e-05	1.5625e-05	7.32422e-06	6.15234e-05	3.41797e-06	2.53906e-05	1.80664e-05	-9.47266e-05	1.95313e-05	6.15234e-05	4.63867e-05
6.34766e-06	1.85547e-05	2.05078e-05	7.8125e-06	0.000139648	2.92969e-06	4.10156e-05	1.36719e-05	1.66016e-05	1.85547e-05	3.02734e-05	3.90625e-05
7.32422e-06	1.95313e-05	1.5625e-05	8.30078e-06	0.000154297	2.44141e-06	2.24609e-05	7.8125e-06	2.34375e-05	1.85547e-05	2.73438e-05	3.90625e-05
8.30078e-06	1.85547e-05	1.26953e-05	5.37109e-06	7.61719e-05	2.68555e-06	-1.36719e-05	4.88281e-06	-2.92969e-06	1.85547e-05	0.000306641	3.41797e-05
9.76563e-06	1.66016e-05	1.95313e-05	5.37109e-06	-2.92969e-05	2.68555e-06	-4.10156e-05	2.44141e-06	-5.56641e-05	1.95313e-05	0.000348633	3.41797e-05
8.30078e-06	1.66016e-05	1.07422e-05	6.34766e-06	-3.22266e-05	4.15039e-06	-2.92969e-05	2.44141e-06	0.000110352	1.95313e-05	6.34766e-05	3.17383e-05
7.32422e-06	1.75781e-05	6.83594e-06	5.37109e-06	1.5625e-05	5.85938e-06	-1.85547e-05	6.34766e-06	0.000212891	2.05078e-05	-4.49219e-05	3.41797e-05
8.30078e-06	1.36719e-05	1.36719e-05	6.34766e-06	4.6875e-05	6.10352e-06	5.85938e-06	6.34766e-06	0.000169922	1.66016e-05	-4.88281e-05	3.17383e-05
1.26953e-05	1.26953e-05	2.05078e-05	7.32422e-06	3.90625e-05	6.83594e-06	1.75781e-05	9.76563e-06	0.000100586	1.5625e-05	-0.000114258	3.90625e-05
8.30078e-06	1.46484e-05	2.63672e-05	9.76563e-06	2.05078e-05	4.15039e-06	-1.07422e-05	9.76563e-06	1.36719e-05	1.5625e-05	-0.000166992	4.15039e-05
4.88281e-06	1.95313e-05	2.34375e-05	5.85938e-06	1.75781e-05	3.17383e-06	-3.71094e-05	8.78906e-06	-8.78906e-06	1.66016e-05	-0.000134766	4.63867e-05
6.83594e-06	2.05078e-05	2.24609e-05	6.34766e-06	2.83203e-05	4.15039e-06	9.76563e-06	7.8125e-06	-9.86328e-05	1.36719e-05	-0.000135742	4.39453e-05
1.2207e-05	1.5625e-05	2.05078e-05	6.34766e-06	3.51562e-05	4.88281e-06	9.66797e-05	8.30078e-06	-0.000118164	1.46484e-05	-0.00015918	4.88281e-05
1.31836e-05	1.36719e-05	1.66016e-05	3.90625e-06	4.39453e-05	3.41797e-06	0.000217773	6.34766e-06	2.24609e-05	1.46484e-05	-9.57031e-05	4.63867e-05
1.07422e-05	1.46484e-05	1.17188e-05	3.90625e-06	4.39453e-05	4.88281e-07	0.000102539	9.76563e-06	0.000126953	1.5625e-05	8.78906e-06	4.63867e-05
8.78906e-06	1.46484e-05	7.8125e-06	3.90625e-06	4.10156e-05	2.92969e-06	-0.000117187	1.07422e-05	6.05469e-05	1.66016e-05	8.69141e-05	4.15039e-05
5.37109e-06	1.66016e-05	1.26953e-05	3.90625e-06	4.10156e-05	6.34766e-06	-0.000266602	1.2207e-05	2.34375e-05	1.75781e-05	0.000167969	4.63867e-05
4.39453e-06	1.85547e-05	1.5625e-05	2.92969e-06	2.73438e-05	6.34766e-06	-0.000237305	1.36719e-05	4.10156e-05	1.5625e-05	0.000202148	4.63867e-05
7.8125e-06	2.05078e-05	2.14844e-05	3.90625e-06	0.000160156	3.66211e-06	-9.76563e-06	1.02539e-05	2.05078e-05	1.66016e-05	0.000180664	4.15039e-05
9.76563e-06	2.24609e-05	2.34375e-05	4.39453e-06	0.00015918	3.41797e-06	0.000163086	9.76563e-06	1.95313e-06	1.46484e-05	8.59375e-05	3.90625e-05
9.27734e-06	1.95313e-05	2.63672e-05	3.41797e-06	2.14844e-05	2.68555e-06	0.000203125	7.8125e-06	-2.92969e-06	1.66016e-05	9.76563e-07	4.15039e-05
9.27734e-06	1.46484e-05	2.34375e-05	5.85938e-06	-0.000115234	1.2207e-06	0.000145508	7.8125e-06	2.53906e-05	1.66016e-05	0.000116211	3.66211e-05
8.30078e-06	1.17188e-05	1.95313e-05	7.32422e-06	-0.000151367	-4.88281e-07	3.32031e-05	8.30078e-06	4.49219e-05	1.66016e-05	0.000157227	3.66211e-05
9.76563e-06	1.17188e-05	1.66016e-05	8.30078e-06	2.34375e-05	-1.2207e-06	-3.90625e-06	1.2207e-05	-6.25e-05	1.46484e-05	-5.66406e-05	3.17383e-05
5.37109e-06	1.5625e-05	1.5625e-05	9.27734e-06	9.17969e-05	7.32422e-07	7.8125e-06	1.61133e-05	-0.000169922	1.66016e-05	-7.42187e-05	4.39453e-05
2.44141e-06	1.75781e-05	1.85547e-05	9.76563e-06	1.85547e-05	1.46484e-06	8.78906e-06	1.51367e-05	-0.000161133	1.66016e-05	7.91016e-05	4.15039e-05
8.78906e-06	1.75781e-05	1.95313e-05	7.8125e-06	-9.375e-05	0	-1.95313e-06	1.31836e-05	-3.125e-05	1.95313e-05	-1.66016e-05	4.39453e-05
4.39453e-06	1.36719e-05	1.75781e-05	6.34766e-06	-0.000169922	1.70898e-06	1.17188e-05	8.78906e-06	8.88672e-05	1.5625e-05	-0.000162109	4.15039e-05
-1.36719e-05	1.26953e-05	1.46484e-05	8.30078e-06	-0.000111328	4.15039e-06	4.88281e-05	5.85938e-06	8.59375e-05	1.66016e-05	-0.000209961	4.63867e-05
-2.44141e-06	1.46484e-05	1.36719e-05	8.78906e-06	-2.53906e-05	3.17383e-06	8.00781e-05	3.90625e-06	8.20313e-05	1.36719e-05	-0.000149414	4.15039e-05
1.02539e-05	1.5625e-05	1.66016e-05	8.78906e-06	-7.42187e-05	6.34766e-06	6.05469e-05	6.83594e-06	8.30078e-05	1.5625e-05	-0.000183594	4.88281e-05
7.8125e-06	2.05078e-05	1.85547e-05	8.30078e-06	0.000183594	4.88281e-06	2.05078e-05	2.44141e-06	7.71484e-05	1.66016e-05	-0.000260742	5.12695e-05
8.78906e-06	1.85547e-05	1.75781e-05	6.83594e-06	0.000341797	5.85938e-06	1.36719e-05	5.85938e-06	1.36719e-05	1.95313e-05	-0.00028418	4.63867e-05
1.5625e-05	1.75781e-05	1.95313e-05	8.78906e-06	0.000154297	5.12695e-06	4.00391e-05	6.34766e-06	-6.73828e-05	1.85547e-05	-0.000236328	4.39453e-05
1.5625e-05	1.75781e-05	1.95313e-05	1.02539e-05	8.98437e-05	8.05664e-06	2.34375e-05	6.83594e-06	-9.76563e-05	1.85547e-05	-6.34766e-05	4.39453e-05
1.51367e-05	1.46484e-05	2.05078e-05	8.30078e-06	0.000118164	7.8125e-06	-1.46484e-05	8.78906e-06	-5.37109e-05	1.66016e-05	8.59375e-05	3.90625e-05
8.78906e-06	1.66016e-05	1.85547e-05	9.27734e-06	7.42187e-05	8.05664e-06	-3.90625e-05	8.78906e-06	2.44141e-05	1.75781e-05	0.000166992	3.66211e-05
-1.95313e-06	1.85547e-05	1.75781e-05	1.02539e-05	-0.000145508	4.39453e-06	-9.57031e-05	6.34766e-06	9.76563e-05	1.36719e-05	0.000208008	3.90625e-05
-1.5625e-05	1.46484e-05	1.75781e-05	7.32422e-06	-0.000266602	9.76563e-07	-3.02734e-05	9.27734e-06	0.000118164	1.5625e-05	0.000204102	4.15039e-05
-1.85547e-05	1.5625e-05	1.95313e-05	8.78906e-06	-0.000254883	0	4.78516e-05	8.30078e-06	-1.46484e-05	1.36719e-05	0.000106445	3.90625e-05
1.5625e-05	1.75781e-05	1.75781e-05	1.07422e-05	-0.000188477	-7.32422e-07	2.92969e-05	8.30078e-06	-0.000103516	1.66016e-05	0.000133789	4.15039e-05
6.20117e-05	1.75781e-05	1.46484e-05	1.02539e-05	4.88281e-05	1.2207e-06	6.05469e-05	8.78906e-06	-8.78906e-05	1.66016e-05	0.000160156	3.66211e-05
3.56445e-05	1.5625e-05	1.36719e-05	7.8125e-06	0.000116211	4.88281e-07	7.12891e-05	7.8125e-06	-3.90625e-05	1.85547e-05	6.54297e-05	4.15039e-05
9.76563e-06	1.46484e-05	2.44141e-05	9.76563e-06	-1.75781e-05	3.66211e-06	8.10547e-05	9.76563e-06	0.000116211	1.66016e-05	-2.53906e-05	4.63867e-05
-2.44141e-06	1.36719e-05	1.07422e-05	7.8125e-06	-0.000126953	4.88281e-06	7.32422e-05	8.30078e-06	6.05469e-05	1.85547e-05	-2.83203e-05	4.39453e-05
-3.90625e-06	1.5625e-05	8.78906e-06	1.07422e-05	-0.000100586	4.88281e-06	4.58984e-05	8.78906e-06	2.24609e-05	1.66016e-05	-5.85938e-06	3.66211e-05
-4.88281e-07	1.5625e-05	1.07422e-05	8.78906e-06	0.000145508	4.88281e-06	2.63672e-05	9.27734e-06	5.46875e-05	1.75781e-05	-2.92969e-06	4.15039e-05
4.88281e-07	1.75781e-05	1.5625e-05	9.76563e-06	0.000238281	5.85938e-06	1.5625e-05	1.02539e-05	0.000112305	1.46484e-05	1.85547e-05	3.90625e-05
0	1.5625e-05	1.95313e-05	8.30078e-06	8.30078e-05	5.61523e-06	2.92969e-06	8.78906e-06	7.61719e-05	1.66016e-05	5.76172e-05	4.15039e-05
4.88281e-06	1.66016e-05	1.85547e-05	9.76563e-06	-6.44531e-05	5.85938e-06	-6.83594e-06	8.30078e-06	5.66406e-05	1.75781e-05	4.39453e-05	3.66211e-05
7.8125e-06	1.46484e-05	1.5625e-05	7.8125e-06	-0.000116211	4.63867e-06	9.76563e-07	7.8125e-06	5.56641e-05	1.66016e-05	2.53906e-05	3.90625e-05
8.30078e-06	1.5625e-05	1.5625e-05	9.76563e-06	-0.000124023	4.15039e-06	9.76563e-06	6.34766e-06	7.8125e-05	1.75781e-05	-6.05469e-05	2.92969e-05
1.07422e-05	1.85547e-05	1.75781e-05	9.27734e-06	2.34375e-05	6.34766e-06	3.71094e-05	5.85938e-06	7.51953e-05	2.14844e-05	0.000124023	3.90625e-05
1.26953e-05	1.95313e-05	1.95313e-05	9.76563e-06	7.91016e-05	6.34766e-06	5.85937e-05	5.85938e-06	9.375e-05	1.95313e-05	0.000410156	4.39453e-05
1.2207e-05	2.05078e-05	2.14844e-05	7.8125e-06	-9.76563e-07	5.37109e-06	1.85547e-05	6.83594e-06	-3.71094e-05	2.14844e-05	0.000125	4.88281e-05
1.02539e-05	1.85547e-05	2.05078e-05	8.78906e-06	-3.02734e-05	5.37109e-06	-3.22266e-05	6.34766e-06	-3.90625e-05	1.75781e-05	-8.10547e-05	4.63867e-05
1.26953e-05	1.85547e-05	1.5625e-05	8.78906e-06	-1.46484e-05	5.37109e-06	4.88281e-06	2.44141e-06	-9.86328e-05	1.75781e-05	-4.29687e-05	4.39453e-05
1.46484e-05	1.66016e-05	1.36719e-05	8.30078e-06	1.85547e-05	1.95313e-06	5.56641e-05	2.44141e-06	1.26953e-05	1.26953e-05	0	3.90625e-05
1.07422e-05	1.5625e-05	9.76563e-06	9.76563e-06	1.75781e-05	3.17383e-06	3.61328e-05	2.44141e-06	-2.92969e-05	1.75781e-05	-6.34766e-05	3.90625e-05
7.32422e-06	1.36719e-05	6.83594e-06	1.02539e-05	1.66016e-05	3.90625e-06	-4.88281e-06	3.90625e-06	-0.000150391	1.75781e-05	-0.000174805	4.15039e-05
8.30078e-06	9.76563e-06	1.17188e-05	7.32422e-06	4.10156e-05	7.56836e-06	2.44141e-05	6.34766e-06	-0.000160156	1.95313e-05	0	3.90625e-05
7.8125e-06	1.17188e-05	1.36719e-05	8.30078e-06	5.46875e-05	8.05664e-06	1.85547e-05	8.78906e-06	-0.000110352	1.5625e-05	0.000417969	2.92969e-05
8.78906e-06	1.5625e-05	1.5625e-05	9.27734e-06	4.6875e-05	6.83594e-06	5.85938e-06	8.78906e-06	-5.85938e-06	1.85547e-05	2.14844e-05	3.17383e-05
9.27734e-06	1.95313e-05	1.66016e-05	9.27734e-06	3.22266e-05	3.41797e-06	-9.76563e-07	1.26953e-05	7.32422e-05	1.66016e-05	-0.000155273	3.41797e-05
9.27734e-06	2.05078e-05	1.66016e-05	1.17188e-05	4.00391e-05	4.88281e-06	-4.00391e-05	1.02539e-05	9.76563e-05	2.24609e-05	-0.000118164	3.66211e-05
9.27734e-06	2.14844e-05	1.66016e-05	1.02539e-05	2.73438e-05	4.15039e-06	-5.27344e-05	8.78906e-06	0.000167969	1.75781e-05	-0.000103516	3.66211e-05
6.34766e-06	1.66016e-05	1.66016e-05	9.76563e-06	6.83594e-05	2.44141e-06	-1.07422e-05	1.07422e-05	0.000262695	1.85547e-05	3.22266e-05	3.66211e-05
6.34766e-06	1.5625e-05	1.5625e-05	8.78906e-06	0.000132813	1.95313e-06	2.83203e-05	9.76563e-06	0.000201172	1.75781e-05	0.000188477	3.90625e-05
7.32422e-06	1.36719e-05	1.5625e-05	7.32422e-06	0.000191406	2.44141e-06	8.69141e-05	1.17188e-05	3.71094e-05	1.85547e-05	0.000235352	5.12695e-05
8.30078e-06	1.5625e-05	1.66016e-05	8.30078e-06	2.44141e-05	1.46484e-06	7.61719e-05	9.27734e-06	-6.83594e-05	1.5625e-05	5.76172e-05	5.37109e-05
8.78906e-06	1.36719e-05	1.75781e-05	8.78906e-06	-9.57031e-05	1.70898e-06	5.46875e-05	7.32422e-06	-9.86328e-05	1.46484e-05	-0.000137695	5.37109e-05
5.85938e-06	1.26953e-05	1.66016e-05	7.8125e-06	-9.17969e-05	2.68555e-06	9.47266e-05	6.34766e-06	-6.44531e-05	1.46484e-05	-0.000231445	5.12695e-05
5.37109e-06	1.66016e-05	1.75781e-05	8.30078e-06	-5.76172e-05	1.95313e-06	2.83203e-05	6.34766e-06	3.90625e-06	1.85547e-05	-0.000172852	4.88281e-05
2.44141e-06	1.75781e-05	1.75781e-05	9.27734e-06	-1.36719e-05	2.44141e-06	-2.14844e-05	3.41797e-06	7.8125e-06	1.66016e-05	0.000133789	4.15039e-05
2.44141e-06	2.14844e-05	1.85547e-05	8.30078e-06	2.05078e-05	2.44141e-06	-0.000125977	2.92969e-06	2.24609e-05	1.75781e-05	0.000189453	3.90625e-05
4.39453e-06	1.85547e-05	1.75781e-05	7.32422e-06	5.37109e-05	1.70898e-06	-0.000152344	5.85938e-06	-2.63672e-05	1.36719e-05	0.00015332	3.17383e-05
3.90625e-06	1.46484e-05	1.46484e-05	8.30078e-06	7.71484e-05	4.15039e-06	-2.24609e-05	9.76563e-06	-0.000125	1.46484e-05	0.000100586	3.41797e-05
4.88281e-06	1.36719e-05	1.66016e-05	8.30078e-06	8.69141e-05	4.63867e-06	4.29687e-05	7.8125e-06	-4.88281e-06	2.05078e-05	0.000158203	3.17383e-05
8.30078e-06	1.46484e-05	1.66016e-05	8.30078e-06	8.69141e-05	3.90625e-06	6.83594e-05	9.76563e-06	8.98437e-05	2.14844e-05	-3.80859e-05	3.17383e-05
7.32422e-06	1.5625e-05	1.85547e-05	8.30078e-06	7.12891e-05	1.95313e-06	9.375e-05	8.78906e-06	2.83203e-05	1.85547e-05	-0.000116211	3.41797e-05
6.83594e-06	1.46484e-05	2.24609e-05	9.27734e-06	7.32422e-05	2.19727e-06	6.15234e-05	1.02539e-05	-8.78906e-06	1.36719e-05	-9.76563e-06	4.15039e-05
6.34766e-06	1.5625e-05	2.34375e-05	7.8125e-06	7.12891e-05	2.44141e-06	1.85547e-05	1.07422e-05	7.22656e-05	1.36719e-05	2.14844e-05	4.39453e-05
7.32422e-06	1.5625e-05	7.8125e-06	8.30078e-06	6.44531e-05	3.41797e-06	0	1.02539e-05	9.76563e-05	1.36719e-05	3.90625e-06	4.63867e-05
7.32422e-06	1.5625e-05	6.83594e-06	9.27734e-06	4.88281e-05	3.17383e-06	-5.85938e-06	1.12305e-05	0.000132813	1.66016e-05	3.02734e-05	4.15039e-05
6.83594e-06	1.66016e-05	1.17188e-05	7.8125e-06	3.125e-05	1.46484e-06	1.36719e-05	1.31836e-05	0.000172852	1.85547e-05	-1.5625e-05	4.39453e-05
6.83594e-06	1.5625e-05	1.46484e-05	7.8125e-06	1.85547e-05	1.70898e-06	3.71094e-05	9.76563e-06	3.22266e-05	1.85547e-05	-0.000226563	4.88281e-05
8.30078e-06	1.75781e-05	1.75781e-05	8.30078e-06	1.07422e-05	4.15039e-06	-1.75781e-05	1.02539e-05	-0.000193359	1.85547e-05	-0.000291016	4.63867e-05
6.83594e-06	1.66016e-05	1.66016e-05	9.76563e-06	6.83594e-06	2.44141e-06	-9.47266e-05	1.12305e-05	-0.000289062	1.75781e-05	-0.000211914	4.63867e-05
7.8125e-06	1.26953e-05	1.5625e-05	7.32422e-06	2.92969e-06	2.44141e-07	-9.96094e-05	9.76563e-06	-0.000236328	1.66016e-05	-3.80859e-05	5.37109e-05
8.30078e-06	1.66016e-05	1.75781e-05	8.30078e-06	-1.95313e-06	4.88281e-07	-3.51562e-05	6.83594e-06	-0.000102539	1.36719e-05	0.000171875	4.88281e-05
8.30078e-06	1.5625e-05	1.5625e-05	8.30078e-06	-8.78906e-05	-7.32422e-07	7.8125e-06	6.83594e-06	0.000114258	1.46484e-05	0.000223633	3.90625e-05
8.30078e-06	1.5625e-05	1.26953e-05	8.30078e-06	6.34766e-05	-1.95313e-06	2.05078e-05	3.90625e-06	0.000196289	1.66016e-05	7.42187e-05	3.41797e-05
9.76563e-06	1.66016e-05	2.24609e-05	8.78906e-06	0.000170898	-3.41797e-06	4.29687e-05	7.32422e-06	0.000193359	1.66016e-05	4.29687e-05	4.15039e-05
7.8125e-06	1.5625e-05	1.95313e-05	7.32422e-06	0.000178711	-2.44141e-06	4.88281e-05	8.30078e-06	5.07812e-05	1.46484e-05	4.6875e-05	4.15039e-05
7.8125e-06	1.46484e-05	2.05078e-05	6.83594e-06	-2.73438e-05	-4.88281e-06	4.39453e-05	9.76563e-06	-0.000119141	1.5625e-05	0.000143555	4.15039e-05
9.27734e-06	1.85547e-05	1.75781e-05	9.76563e-06	-0.000201172	-2.19727e-06	4.00391e-05	1.26953e-05	-4.98047e-05	1.66016e-05	-3.71094e-05	3.90625e-05
8.78906e-06	1.5625e-05	1.66016e-05	8.78906e-06	-0.000214844	3.17383e-06	3.80859e-05	1.17188e-05	0.000145508	1.46484e-05	-0.000141602	3.90625e-05
8.30078e-06	1.5625e-05	1.46484e-05	6.34766e-06	-0.000166992	7.08008e-06	2.92969e-05	1.07422e-05	0.000105469	1.46484e-05	-0.000149414	4.39453e-05
7.8125e-06	1.75781e-05	1.07422e-05	8.30078e-06	-8.88672e-05	8.30078e-06	4.6875e-05	8.30078e-06	0.00025293	1.5625e-05	-8.30078e-05	4.63867e-05
8.78906e-06	1.5625e-05	1.26953e-05	8.30078e-06	-7.42187e-05	5.61523e-06	0.000128906	7.8125e-06	0.000198242	1.75781e-05	-3.61328e-05	4.39453e-05
1.02539e-05	1.46484e-05	1.26953e-05	7.8125e-06	-1.85547e-05	5.37109e-06	0.000116211	8.30078e-06	-0.000336914	1.95313e-05	6.93359e-05	4.88281e-05
7.32422e-06	1.5625e-05	1.5625e-05	7.32422e-06	0.000250977	7.8125e-06	1.85547e-05	7.8125e-06	-0.000582031	1.85547e-05	6.93359e-05	4.15039e-05
8.78906e-06	1.66016e-05	1.66016e-05	7.8125e-06	0.000475586	8.05664e-06	-8.30078e-05	8.30078e-06	-0.000355469	2.05078e-05	1.95313e-05	4.15039e-05
7.8125e-06	1.5625e-05	1.66016e-05	9.27734e-06	0.000378906	7.08008e-06	-0.000132813	8.78906e-06	5.37109e-05	1.75781e-05	-3.125e-05	4.15039e-05
9.27734e-06	1.75781e-05	1.66016e-05	8.78906e-06	5.56641e-05	4.15039e-06	-0.000103516	8.30078e-06	0.000125977	1.75781e-05	-2.92969e-05	4.39453e-05
7.8125e-06	1.66016e-05	1.5625e-05	8.78906e-06	-0.000149414	3.17383e-06	-3.90625e-06	9.76563e-06	0.000152344	1.75781e-05	-3.02734e-05	3.90625e-05
8.78906e-06	1.66016e-05	1.36719e-05	7.8125e-06	-0.000228516	9.76563e-07	2.05078e-05	8.30078e-06	0.00019043	1.66016e-05	-2.05078e-05	4.15039e-05
8.78906e-06	1.85547e-05	1.46484e-05	7.8125e-06	-0.000270508	-1.95313e-06	5.37109e-05	5.85938e-06	0.000188477	1.5625e-05	-5.85938e-06	4.15039e-05
9.27734e-06	1.75781e-05	1.75781e-05	7.8125e-06	-0.000210937	7.32422e-07	0.000105469	5.85938e-06	0.000195313	1.85547e-05	-3.90625e-06	4.88281e-05
9.27734e-06	1.5625e-05	1.75781e-05	7.8125e-06	-0.000109375	1.70898e-06	6.83594e-05	6.34766e-06	0.000192383	1.75781e-05	-1.95313e-05	4.15039e-05
9.76563e-06	1.5625e-05	1.95313e-05	7.8125e-06	-6.25e-05	6.10352e-06	2.44141e-05	7.8125e-06	0.000128906	1.85547e-05	-4.10156e-05	3.90625e-05
8.30078e-06	1.66016e-05	1.75781e-05	8.30078e-06	3.71094e-05	6.83594e-06	-1.95313e-06	1.07422e-05	4.6875e-05	1.75781e-05	-7.03125e-05	3.66211e-05
8.78906e-06	1.66016e-05	1.75781e-05	8.78906e-06	0.000120117	7.32422e-06	-0.000109375	8.30078e-06	-6.83594e-06	1.66016e-05	-3.51562e-05	4.39453e-05
8.78906e-06	1.66016e-05	1.85547e-05	9.27734e-06	0.000140625	1.07422e-05	-0.000141602	9.27734e-06	-1.17188e-05	1.66016e-05	2.14844e-05	3.66211e-05
1.02539e-05	1.95313e-05	1.85547e-05	7.8125e-06	0.000133789	1.19629e-05	3.90625e-06	1.02539e-05	-1.66016e-05	1.75781e-05	7.8125e-05	3.66211e-05
9.76563e-06	1.26953e-05	1.07422e-05	9.76563e-06	0.000115234	1.02539e-05	0.000157227	7.32422e-06	-3.71094e-05	1.75781e-05	0.000112305	3.17383e-05
8.78906e-06	1.17188e-05	8.78906e-06	6.83594e-06	8.20313e-05	7.8125e-06	0.000135742	7.8125e-06	0	1.75781e-05	0.000167969	3.66211e-05
3.41797e-06	1.5625e-05	1.07422e-05	8.30078e-06	4.98047e-05	8.30078e-06	8.39844e-05	5.85938e-06	2.73438e-05	1.46484e-05	0.000180664	3.66211e-05
-1.80664e-05	1.75781e-05	1.66016e-05	8.30078e-06	1.17188e-05	8.30078e-06	6.15234e-05	8.30078e-06	8.10547e-05	1.66016e-05	0.000165039	4.15039e-05
-2.92969e-05	2.05078e-05	2.05078e-05	8.78906e-06	-8.78906e-06	4.63867e-06	2.53906e-05	8.30078e-06	0.000125	1.75781e-05	6.93359e-05	4.15039e-05
-1.9043e-05	2.05078e-05	1.95313e-05	8.30078e-06	-5.85938e-06	5.12695e-06	-2.05078e-05	7.8125e-06	7.42187e-05	1.66016e-05	-9.08203e-05	5.12695e-05
1.02539e-05	1.85547e-05	1.85547e-05	7.8125e-06	-6.83594e-06	5.37109e-06	-1.85547e-05	9.27734e-06	4.10156e-05	1.66016e-05	-0.000157227	5.12695e-05
5.0293e-05	1.85547e-05	1.75781e-05	8.78906e-06	-4.88281e-06	6.10352e-06	-3.90625e-06	9.27734e-06	5.46875e-05	1.95313e-05	-9.27734e-05	4.39453e-05
8.20313e-05	1.46484e-05	1.75781e-05	7.8125e-06	5.85938e-06	4.88281e-06	3.90625e-06	7.8125e-06	6.44531e-05	1.5625e-05	-4.10156e-05	3.66211e-05
6.10352e-05	1.5625e-05	2.05078e-05	8.30078e-06	4.88281e-06	5.85938e-06	2.92969e-06	8.78906e-06	1.46484e-05	1.75781e-05	4.19922e-05	3.17383e-05
1.75781e-05	1.46484e-05	1.95313e-05	9.27734e-06	-3.90625e-06	4.88281e-06	1.36719e-05	8.78906e-06	-0.000121094	1.5625e-05	0.000158203	2.68555e-05
-8.78906e-06	1.75781e-05	1.75781e-05	9.27734e-06	-9.76563e-07	2.92969e-06	4.10156e-05	8.30078e-06	-9.57031e-05	1.5625e-05	0.00037207	2.92969e-05
-1.26953e-05	1.75781e-05	1.75781e-05	7.8125e-06	9.76563e-07	5.37109e-06	2.83203e-05	6.34766e-06	-4.58984e-05	1.66016e-05	0.000432617	3.17383e-05
-5.37109e-06	1.17188e-05	1.5625e-05	6.83594e-06	3.90625e-06	6.34766e-06	1.46484e-05	1.02539e-05	5.56641e-05	1.85547e-05	0.000405273	4.15039e-05
-1.46484e-06	1.5625e-05	1.5625e-05	8.78906e-06	4.39453e-05	4.39453e-06	1.26953e-05	8.78906e-06	0.000249023	1.46484e-05	0.000165039	3.90625e-05
-1.07422e-05	1.5625e-05	1.5625e-05	8.78906e-06	3.61328e-05	3.66211e-06	1.85547e-05	8.78906e-06	0.000138672	1.66016e-05	8.78906e-06	3.41797e-05
-6.34766e-06	1.66016e-05	1.5625e-05	7.8125e-06	2.63672e-05	2.92969e-06	2.14844e-05	8.78906e-06	0.000120117	1.46484e-05	-9.76563e-07	3.41797e-05
6.34766e-06	1.5625e-05	1.5625e-05	8.30078e-06	2.24609e-05	2.68555e-06	1.95313e-05	8.30078e-06	0.000154297	1.66016e-05	-8.39844e-05	5.12695e-05
1.17188e-05	1.5625e-05	1.5625e-05	9.27734e-06	1.5625e-05	3.17383e-06	9.76563e-06	7.32422e-06	8.00781e-05	1.66016e-05	-0.000139648	5.37109e-05
6.34766e-06	1.75781e-05	1.66016e-05	6.34766e-06	2.05078e-05	4.63867e-06	6.83594e-06	6.34766e-06	3.90625e-06	1.66016e-05	-0.000104492	4.88281e-05
-2.44141e-06	1.46484e-05	1.75781e-05	8.30078e-06	2.73438e-05	4.15039e-06	7.8125e-06	4.88281e-06	-3.32031e-05	1.46484e-05	-4.49219e-05	3.90625e-05
-6.83594e-06	1.36719e-05	1.66016e-05	7.8125e-06	3.41797e-05	1.46484e-06	1.46484e-05	8.78906e-06	-3.51562e-05	1.66016e-05	1.5625e-05	3.90625e-05
-1.2207e-05	1.5625e-05	1.5625e-05	9.76563e-06	4.00391e-05	2.44141e-07	3.90625e-05	8.78906e-06	-2.34375e-05	1.85547e-05	4.29687e-05	3.17383e-05
-2.19727e-05	1.85547e-05	1.66016e-05	6.83594e-06	4.78516e-05	0	0.000114258	1.02539e-05	-3.80859e-05	1.5625e-05	6.05469e-05	3.41797e-05
-3.90625e-06	1.85547e-05	1.66016e-05	8.30078e-06	4.88281e-05	-7.32422e-07	0.000174805	9.27734e-06	-1.75781e-05	1.46484e-05	7.42187e-05	4.15039e-05
2.68555e-05	1.36719e-05	1.66016e-05	9.27734e-06	3.71094e-05	7.32422e-07	8.20313e-05	9.76563e-06	-3.51562e-05	1.5625e-05	6.34766e-05	4.63867e-05
3.95508e-05	1.66016e-05	1.75781e-05	8.78906e-06	1.85547e-05	1.70898e-06	1.07422e-05	1.02539e-05	-4.39453e-05	1.66016e-05	6.15234e-05	3.90625e-05
3.27148e-05	1.46484e-05	1.46484e-05	8.30078e-06	1.95313e-06	1.2207e-06	-2.34375e-05	1.02539e-05	-5.17578e-05	1.75781e-05	0.000147461	4.15039e-05
1.9043e-05	1.75781e-05	1.66016e-05	8.30078e-06	-4.88281e-06	-9.76563e-07	-2.34375e-05	1.02539e-05	-6.15234e-05	1.66016e-05	0.000109375	3.90625e-05
1.31836e-05	1.46484e-05	1.5625e-05	7.8125e-06	-5.85938e-06	2.44141e-07	9.17969e-05	9.27734e-06	-5.27344e-05	1.75781e-05	5.27344e-05	4.39453e-05
1.2207e-05	1.46484e-05	1.75781e-05	6.83594e-06	-4.88281e-06	0	0.000129883	3.90625e-06	-2.14844e-05	1.66016e-05	-6.54297e-05	4.15039e-05
5.37109e-06	1.5625e-05	1.85547e-05	5.85938e-06	-3.90625e-06	9.76563e-07	6.05469e-05	6.83594e-06	4.88281e-05	1.85547e-05	-8.69141e-05	4.39453e-05
-5.37109e-06	1.75781e-05	2.05078e-05	1.46484e-05	1.95313e-06	1.70898e-06	4.10156e-05	6.34766e-06	9.86328e-05	1.46484e-05	-3.90625e-06	3.90625e-05
-5.37109e-06	1.5625e-05	1.75781e-05	1.17188e-05	2.44141e-05	1.70898e-06	-3.90625e-05	6.34766e-06	9.08203e-05	1.66016e-05	4.10156e-05	3.90625e-05
-5.85938e-06	1.46484e-05	1.75781e-05	7.8125e-06	3.02734e-05	-9.76563e-07	-0.000146484	9.27734e-06	6.05469e-05	1.5625e-05	-4.88281e-06	3.17383e-05
-1.02539e-05	1.36719e-05	1.26953e-05	5.85938e-06	1.5625e-05	-1.70898e-06	-0.000135742	8.78906e-06	-5.85937e-05	1.85547e-05	-5.17578e-05	3.90625e-05
2.92969e-06	1.46484e-05	9.76563e-06	9.27734e-06	-3.51562e-05	-4.88281e-07	-7.8125e-05	9.27734e-06	-0.000176758	1.66016e-05	-7.8125e-05	4.39453e-05
3.17383e-05	1.85547e-05	4.88281e-06	7.32422e-06	-6.93359e-05	2.44141e-07	-1.95313e-05	9.27734e-06	-0.000328125	1.85547e-05	-8.20313e-05	5.12695e-05
7.17773e-05	1.66016e-05	5.85938e-06	1.07422e-05	-4.19922e-05	-2.44141e-07	2.14844e-05	8.78906e-06	-0.000243164	1.85547e-05	-7.51953e-05	5.37109e-05
6.25e-05	1.26953e-05	3.90625e-06	1.36719e-05	4.39453e-05	2.44141e-06	2.24609e-05	7.8125e-06	-8.00781e-05	1.75781e-05	-6.15234e-05	4.88281e-05
-6.34766e-06	1.36719e-05	0	1.26953e-05	0.000123047	2.92969e-06	0.000175781	9.76563e-06	0.000142578	1.66016e-05	-5.56641e-05	4.15039e-05
-2.24609e-05	1.75781e-05	0	1.46484e-05	0.000109375	2.19727e-06	0.000165039	8.78906e-06	0.000310547	1.75781e-05	-4.49219e-05	4.39453e-05
-1.26953e-05	1.95313e-05	1.07422e-05	1.17188e-05	-2.92969e-05	1.46484e-06	3.90625e-05	7.8125e-06	0.00040918	1.46484e-05	-3.22266e-05	4.15039e-05
-9.76563e-07	1.75781e-05	2.83203e-05	3.90625e-06	-0.000125977	1.95313e-06	-0.000157227	6.34766e-06	0.000258789	1.5625e-05	-5.85938e-06	4.15039e-05
5.85938e-06	1.36719e-05	3.61328e-05	3.41797e-06	-8.30078e-05	4.39453e-06	-9.08203e-05	3.41797e-06	0.00025293	1.66016e-05	-2.05078e-05	3.90625e-05
5.37109e-06	1.66016e-05	3.61328e-05	-9.76563e-07	1.95313e-06	5.37109e-06	-3.51562e-05	6.83594e-06	3.71094e-05	1.85547e-05	-2.63672e-05	4.15039e-05
8.78906e-06	1.95313e-05	4.88281e-05	9.76563e-07	3.71094e-05	3.66211e-06	-5.46875e-05	7.32422e-06	-0.000258789	1.66016e-05	-3.02734e-05	3.90625e-05
2.68555e-05	1.85547e-05	5.27344e-05	1.95313e-06	4.10156e-05	5.37109e-06	6.25e-05	1.07422e-05	-0.000397461	1.95313e-05	-2.14844e-05	4.15039e-05
3.61328e-05	1.66016e-05	2.92969e-05	-9.76563e-07	3.90625e-05	5.37109e-06	0.00012207	7.32422e-06	-0.000195313	1.66016e-05	-1.85547e-05	3.66211e-05
2.58789e-05	1.46484e-05	3.90625e-06	8.30078e-06	3.22266e-05	7.32422e-06	0.00015332	1.07422e-05	-7.32422e-05	1.85547e-05	-1.26953e-05	4.15039e-05
1.41602e-05	1.66016e-05	-6.83594e-06	9.76563e-06	5.95703e-05	4.63867e-06	6.44531e-05	1.2207e-05	0.000114258	1.75781e-05	-1.95313e-06	3.90625e-05
7.32422e-06	1.5625e-05	-6.83594e-06	1.31836e-05	0.000167969	4.63867e-06	-0.000107422	1.26953e-05	0.000259766	1.66016e-05	6.83594e-05	4.39453e-05
8.78906e-06	1.75781e-05	3.90625e-06	1.41602e-05	0.000152344	5.61523e-06	-0.000131836	1.75781e-05	0.000193359	1.5625e-05	2.44141e-05	4.15039e-05
1.07422e-05	1.75781e-05	1.17188e-05	1.36719e-05	-5.85938e-06	4.15039e-06	-3.80859e-05	1.61133e-05	0.000135742	1.95313e-05	5.07812e-05	4.15039e-05
1.26953e-05	1.75781e-05	0.000135742	1.31836e-05	-7.51953e-05	3.90625e-06	-1.36719e-05	1.41602e-05	6.83594e-06	1.85547e-05	7.22656e-05	3.66211e-05
1.2207e-05	1.5625e-05	7.32422e-05	1.9043e-05	-1.07422e-05	3.41797e-06	9.76563e-07	1.41602e-05	-8.59375e-05	1.85547e-05	-6.64063e-05	3.90625e-05
1.26953e-05	1.66016e-05	-0.000165039	3.41797e-06	-5.66406e-05	9.76563e-07	-4.29687e-05	1.2207e-05	-5.37109e-05	1.5625e-05	-3.125e-05	3.66211e-05
1.31836e-05	1.66016e-05	-0.000183594	-3.90625e-06	-0.000209961	2.44141e-07	-6.15234e-05	9.27734e-06	-9.76563e-06	1.75781e-05	7.61719e-05	4.15039e-05
1.17188e-05	1.85547e-05	-6.34766e-05	1.46484e-06	-0.000293945	-9.76563e-07	-8.78906e-06	6.83594e-06	8.78906e-06	1.75781e-05	5.56641e-05	3.90625e-05
1.07422e-05	1.66016e-05	0.000130859	1.46484e-06	-1.46484e-05	9.76563e-07	2.05078e-05	7.32422e-06	-8.78906e-05	1.66016e-05	1.36719e-05	4.15039e-05
1.02539e-05	1.75781e-05	0.000333008	6.34766e-06	0.000189453	1.46484e-06	5.95703e-05	5.85938e-06	-0.000106445	1.5625e-05	-5.85938e-06	4.15039e-05
6.83594e-06	1.85547e-05	0.00025	4.88281e-06	0.000128906	4.15039e-06	6.34766e-05	4.88281e-06	-0.000172852	1.85547e-05	-3.51562e-05	4.63867e-05
1.95313e-06	1.85547e-05	2.44141e-05	5.37109e-06	5.17578e-05	6.10352e-06	6.44531e-05	4.88281e-06	-0.000121094	1.75781e-05	-3.80859e-05	3.90625e-05
3.90625e-06	1.5625e-05	-0.000166016	6.83594e-06	5.66406e-05	1.00098e-05	4.49219e-05	8.30078e-06	3.80859e-05	1.85547e-05	-7.8125e-06	3.90625e-05
6.34766e-06	1.17188e-05	-0.000119141	9.27734e-06	8.10547e-05	8.78906e-06	2.63672e-05	8.30078e-06	9.375e-05	1.95313e-05	7.8125e-06	3.90625e-05
1.95313e-06	1.46484e-05	-6.83594e-06	5.85938e-06	8.39844e-05	1.02539e-05	2.34375e-05	9.27734e-06	0.000264648	1.95313e-05	2.92969e-06	4.39453e-05
3.90625e-06	1.66016e-05	2.73438e-05	7.8125e-06	7.22656e-05	1.02539e-05	4.29687e-05	1.17188e-05	0.000195313	1.66016e-05	-1.95313e-05	4.15039e-05
2.92969e-06	1.75781e-05	1.95313e-05	1.2207e-05	4.58984e-05	1.0498e-05	0.000116211	9.76563e-06	0.000126953	1.85547e-05	-3.90625e-05	4.15039e-05
-1.95313e-06	1.95313e-05	3.02734e-05	1.70898e-05	2.24609e-05	8.54492e-06	0.000142578	7.8125e-06	0.000142578	1.85547e-05	9.76563e-05	3.41797e-05
-3.41797e-06	1.75781e-05	2.83203e-05	2.29492e-05	1.07422e-05	8.05664e-06	9.17969e-05	8.30078e-06	8.10547e-05	1.85547e-05	0.00012793	4.39453e-05
1.46484e-06	1.5625e-05	3.61328e-05	2.19727e-05	1.46484e-05	7.32422e-06	-5.37109e-05	7.8125e-06	3.71094e-05	1.5625e-05	3.51562e-05	4.39453e-05
1.46484e-06	1.36719e-05	3.32031e-05	1.46484e-05	1.95313e-05	4.88281e-06	-0.000250977	6.83594e-06	1.36719e-05	1.5625e-05	-6.83594e-06	4.15039e-05
4.88281e-07	1.46484e-05	2.24609e-05	1.12305e-05	2.14844e-05	4.63867e-06	-0.000177734	1.02539e-05	-3.02734e-05	1.66016e-05	0.000313477	4.15039e-05
-3.90625e-06	1.66016e-05	9.76563e-06	1.95313e-06	8.78906e-06	2.68555e-06	1.07422e-05	1.07422e-05	-4.39453e-05	1.75781e-05	0.000357422	4.39453e-05
-7.8125e-06	1.75781e-05	1.07422e-05	-4.88281e-07	9.76563e-07	4.15039e-06	0.000114258	9.27734e-06	-6.93359e-05	1.5625e-05	-9.66797e-05	3.41797e-05
-7.8125e-06	1.75781e-05	8.78906e-06	4.88281e-07	-5.85938e-06	1.46484e-06	0.000118164	6.83594e-06	-4.00391e-05	1.5625e-05	-0.000249023	3.41797e-05
-3.90625e-06	2.05078e-05	1.46484e-05	2.44141e-06	9.76563e-07	1.2207e-06	6.83594e-05	8.78906e-06	-1.95313e-06	1.46484e-05	-0.000136719	2.92969e-05
1.46484e-06	1.95313e-05	2.92969e-05	6.83594e-06	4.88281e-06	2.44141e-06	7.22656e-05	9.76563e-06	7.8125e-06	1.66016e-05	-0.000226563	3.90625e-05
2.92969e-06	1.75781e-05	2.34375e-05	6.34766e-06	1.26953e-05	3.41797e-06	6.25e-05	6.34766e-06	2.92969e-06	1.95313e-05	-0.000208008	4.15039e-05
3.41797e-06	1.66016e-05	-1.46484e-05	1.02539e-05	-9.76563e-06	2.19727e-06	7.8125e-05	1.07422e-05	7.32422e-05	1.75781e-05	0.000273438	4.15039e-05
4.88281e-07	1.66016e-05	-3.90625e-06	1.70898e-05	-0.000129883	0	6.64063e-05	8.78906e-06	0.000109375	1.5625e-05	0.000625	4.15039e-05
9.76563e-07	1.26953e-05	6.83594e-06	1.95313e-05	-3.125e-05	2.68555e-06	4.10156e-05	7.32422e-06	9.17969e-05	1.5625e-05	0.000342773	4.39453e-05
4.39453e-06	1.26953e-05	3.90625e-06	1.5625e-05	9.66797e-05	6.34766e-06	1.95313e-05	3.90625e-06	-8.49609e-05	1.5625e-05	0.000618164	4.63867e-05
7.32422e-06	1.36719e-05	1.07422e-05	2.19727e-05	0.00012207	6.5918e-06	6.83594e-06	3.41797e-06	-0.000176758	1.95313e-05	0.000114258	4.63867e-05
6.83594e-06	1.46484e-05	1.95313e-05	1.2207e-05	9.375e-05	6.83594e-06	-9.76563e-07	2.44141e-06	-0.000141602	1.66016e-05	-0.000455078	4.88281e-05
7.32422e-06	1.85547e-05	1.17188e-05	1.36719e-05	8.10547e-05	5.85938e-06	-1.95313e-06	3.41797e-06	-7.12891e-05	1.5625e-05	-0.000513672	4.63867e-05
6.83594e-06	1.75781e-05	7.8125e-06	1.36719e-05	7.12891e-05	3.66211e-06	2.92969e-06	5.85938e-06	6.44531e-05	1.5625e-05	-0.00053418	4.39453e-05
4.88281e-06	1.66016e-05	4.88281e-06	5.37109e-06	5.76172e-05	4.15039e-06	1.66016e-05	5.85938e-06	0.00012207	1.5625e-05	-0.000301758	4.39453e-05
8.78906e-06	1.66016e-05	5.85938e-06	5.85938e-06	4.19922e-05	5.61523e-06	2.73438e-05	2.44141e-06	0.000110352	1.66016e-05	-6.83594e-06	4.63867e-05
7.8125e-06	1.66016e-05	4.88281e-06	6.83594e-06	1.85547e-05	4.39453e-06	3.125e-05	5.85938e-06	0.000124023	1.85547e-05	0.000160156	4.88281e-05
8.78906e-06	1.5625e-05	4.88281e-06	8.30078e-06	-5.17578e-05	2.68555e-06	2.05078e-05	4.88281e-06	7.8125e-05	1.75781e-05	0.000231445	3.90625e-05
8.78906e-06	1.85547e-05	4.88281e-06	8.30078e-06	5.07812e-05	1.46484e-06	-9.76563e-07	7.32422e-06	7.91016e-05	1.75781e-05	0.000176758	2.92969e-05
8.78906e-06	1.66016e-05	8.78906e-06	7.32422e-06	9.47266e-05	-2.19727e-06	-2.05078e-05	4.88281e-06	6.93359e-05	1.5625e-05	1.75781e-05	2.92969e-05
7.8125e-06	2.05078e-05	2.92969e-06	9.27734e-06	3.90625e-06	-1.46484e-06	-4.88281e-06	7.8125e-06	9.76563e-06	1.95313e-05	-1.5625e-05	4.15039e-05
9.76563e-06	1.46484e-05	1.95313e-06	8.30078e-06	-3.32031e-05	-1.70898e-06	2.05078e-05	7.32422e-06	-3.71094e-05	1.66016e-05	-4.00391e-05	4.88281e-05
9.76563e-06	1.07422e-05	7.8125e-06	7.8125e-06	-2.44141e-05	7.32422e-07	3.80859e-05	9.76563e-06	-4.39453e-05	1.66016e-05	-4.98047e-05	5.37109e-05
1.26953e-05	1.36719e-05	4.88281e-06	7.8125e-06	-3.90625e-06	4.88281e-07	4.19922e-05	9.76563e-06	-4.6875e-05	1.46484e-05	-3.71094e-05	5.37109e-05
1.07422e-05	1.5625e-05	4.88281e-06	8.30078e-06	3.125e-05	-2.44141e-07	3.80859e-05	8.78906e-06	1.66016e-05	1.46484e-05	1.95313e-06	5.12695e-05
1.12305e-05	1.75781e-05	8.78906e-06	8.30078e-06	0.000102539	2.92969e-06	3.61328e-05	6.34766e-06	2.92969e-05	1.46484e-05	5.85938e-06	3.90625e-05
8.78906e-06	1.75781e-05	1.36719e-05	6.34766e-06	9.08203e-05	5.12695e-06	3.32031e-05	6.34766e-06	-1.07422e-05	1.66016e-05	-2.53906e-05	3.90625e-05
9.27734e-06	1.75781e-05	1.5625e-05	6.83594e-06	2.14844e-05	3.17383e-06	2.83203e-05	6.83594e-06	2.53906e-05	1.5625e-05	2.53906e-05	3.90625e-05
1.02539e-05	1.66016e-05	1.5625e-05	6.83594e-06	-2.24609e-05	1.2207e-06	1.5625e-05	7.32422e-06	-3.41797e-05	1.75781e-05	0.000217773	4.39453e-05
1.07422e-05	1.5625e-05	1.66016e-05	5.85938e-06	4.10156e-05	1.70898e-06	1.75781e-05	9.27734e-06	-5.07812e-05	1.85547e-05	0.000125	3.90625e-05
9.27734e-06	1.66016e-05	1.75781e-05	5.85938e-06	4.10156e-05	1.70898e-06	2.73438e-05	8.30078e-06	-2.83203e-05	1.85547e-05	-5.07812e-05	4.15039e-05
1.02539e-05	1.5625e-05	1.5625e-05	5.85938e-06	-1.75781e-05	1.46484e-06	2.92969e-05	7.8125e-06	-1.5625e-05	1.5625e-05	-5.37109e-05	3.90625e-05
1.17188e-05	1.46484e-05	1.66016e-05	4.88281e-06	-9.17969e-05	-2.44141e-07	2.63672e-05	7.32422e-06	-9.76563e-07	1.66016e-05	-0.000106445	4.63867e-05
9.76563e-06	1.17188e-05	1.75781e-05	5.37109e-06	-0.000135742	4.15039e-06	1.46484e-05	6.83594e-06	1.85547e-05	1.5625e-05	-0.000198242	4.88281e-05
1.31836e-05	1.75781e-05	1.5625e-05	5.37109e-06	-8.78906e-05	3.66211e-06	0	6.83594e-06	5.17578e-05	1.5625e-05	-0.000210937	4.63867e-05
1.2207e-05	1.66016e-05	1.75781e-05	5.37109e-06	-2.53906e-05	2.19727e-06	6.83594e-06	5.85938e-06	7.03125e-05	1.46484e-05	-0.000135742	3.90625e-05
1.17188e-05	1.95313e-05	1.85547e-05	6.34766e-06	-1.95313e-05	9.76563e-07	9.76563e-06	7.8125e-06	6.34766e-05	1.75781e-05	-2.34375e-05	4.39453e-05
9.27734e-06	1.75781e-05	1.85547e-05	7.32422e-06	-5.17578e-05	-1.2207e-06	-9.76563e-07	9.27734e-06	7.03125e-05	1.75781e-05	9.76563e-07	3.90625e-05
8.78906e-06	1.85547e-05	1.95313e-05	6.34766e-06	-6.83594e-06	2.19727e-06	6.83594e-06	8.30078e-06	0.000101562	1.85547e-05	8.00781e-05	3.90625e-05
3.41797e-06	1.75781e-05	2.24609e-05	5.85938e-06	0.000326172	2.44141e-06	1.85547e-05	8.78906e-06	0.000118164	1.66016e-05	0.000185547	4.15039e-05
-7.32422e-06	1.75781e-05	2.05078e-05	5.85938e-06	0.000386719	3.17383e-06	2.05078e-05	7.8125e-06	-2.05078e-05	1.95313e-05	0.000154297	5.12695e-05
-1.66016e-05	1.66016e-05	2.14844e-05	5.37109e-06	-4.19922e-05	-7.32422e-07	8.78906e-06	8.78906e-06	5.85938e-06	1.46484e-05	0.000120117	4.15039e-05
-1.95313e-06	1.5625e-05	2.14844e-05	7.8125e-06	-0.00027832	-1.70898e-06	9.76563e-07	7.32422e-06	-3.41797e-05	1.66016e-05	6.83594e-05	4.15039e-05
5.12695e-05	1.5625e-05	2.05078e-05	2.68555e-05	-1.95313e-05	7.32422e-07	1.17188e-05	8.78906e-06	-9.76563e-07	1.66016e-05	1.07422e-05	3.66211e-05
5.27344e-05	1.5625e-05	2.14844e-05	3.90625e-06	5.17578e-05	1.95313e-06	4.10156e-05	8.30078e-06	-5.85938e-06	1.95313e-05	-6.83594e-06	3.90625e-05
2.19727e-05	1.66016e-05	1.95313e-05	-2.92969e-06	-0.000100586	4.39453e-06	5.76172e-05	7.8125e-06	-3.80859e-05	1.75781e-05	-8.78906e-06	3.66211e-05
5.37109e-06	1.46484e-05	1.75781e-05	-1.46484e-06	-1.07422e-05	5.85938e-06	1.36719e-05	8.78906e-06	-2.14844e-05	1.95313e-05	1.75781e-05	4.15039e-05
3.90625e-06	1.46484e-05	1.85547e-05	9.76563e-07	6.83594e-05	5.37109e-06	-6.15234e-05	7.32422e-06	-4.88281e-06	1.75781e-05	4.00391e-05	3.66211e-05
3.90625e-06	1.66016e-05	2.24609e-05	3.41797e-06	-7.8125e-06	5.61523e-06	-8.30078e-05	1.07422e-05	-3.80859e-05	1.75781e-05	5.27344e-05	3.66211e-05
2.44141e-06	1.75781e-05	2.34375e-05	7.32422e-06	-9.375e-05	7.08008e-06	-2.83203e-05	9.27734e-06	-3.51562e-05	1.5625e-05	5.56641e-05	3.66211e-05
5.37109e-06	1.75781e-05	2.44141e-05	7.32422e-06	-9.86328e-05	9.76563e-06	4.49219e-05	9.76563e-06	-1.5625e-05	1.5625e-05	8.49609e-05	3.90625e-05
1.95313e-06	1.75781e-05	2.63672e-05	8.30078e-06	-3.61328e-05	1.17188e-05	6.73828e-05	7.8125e-06	-4.88281e-06	1.26953e-05	9.57031e-05	3.17383e-05
5.37109e-06	1.66016e-05	2.34375e-05	8.30078e-06	3.125e-05	1.34277e-05	6.25e-05	5.85938e-06	4.19922e-05	1.26953e-05	8.30078e-05	3.90625e-05
8.78906e-06	1.75781e-05	2.53906e-05	9.27734e-06	8.49609e-05	9.76563e-06	3.51562e-05	8.78906e-06	0.000107422	1.36719e-05	7.91016e-05	3.90625e-05
9.76563e-06	1.5625e-05	2.34375e-05	7.8125e-06	9.86328e-05	7.32422e-06	6.83594e-06	9.27734e-06	8.39844e-05	1.85547e-05	8.59375e-05	3.90625e-05
1.31836e-05	1.66016e-05	2.24609e-05	9.76563e-06	7.61719e-05	8.30078e-06	-6.83594e-06	1.12305e-05	8.30078e-05	1.75781e-05	8.00781e-05	3.66211e-05
1.2207e-05	1.5625e-05	1.85547e-05	1.02539e-05	-3.32031e-05	5.12695e-06	7.8125e-06	1.26953e-05	5.66406e-05	1.75781e-05	7.91016e-05	3.90625e-05
1.31836e-05	1.85547e-05	1.95313e-05	1.07422e-05	-9.17969e-05	1.70898e-06	2.44141e-05	9.76563e-06	-3.51562e-05	1.95313e-05	7.12891e-05	3.66211e-05
1.66016e-05	1.66016e-05	1.75781e-05	7.32422e-06	-5.27344e-05	-1.95313e-06	3.32031e-05	1.02539e-05	-0.000117187	2.14844e-05	6.83594e-05	4.15039e-05
2.29492e-05	1.85547e-05	2.05078e-05	1.07422e-05	9.76563e-07	-1.95313e-06	5.56641e-05	7.32422e-06	-8.39844e-05	1.66016e-05	5.95703e-05	3.66211e-05
2.88086e-05	1.75781e-05	1.95313e-05	8.30078e-06	5.85938e-06	9.76563e-07	7.71484e-05	7.8125e-06	-4.10156e-05	1.66016e-05	5.46875e-05	3.90625e-05
3.75977e-05	1.75781e-05	2.14844e-05	7.8125e-06	9.76563e-06	2.44141e-06	3.02734e-05	6.34766e-06	-2.34375e-05	1.85547e-05	4.39453e-05	3.66211e-05
8.78906e-06	1.5625e-05	1.85547e-05	8.30078e-06	4.98047e-05	4.39453e-06	-6.73828e-05	8.30078e-06	-3.90625e-06	1.95313e-05	3.90625e-05	3.90625e-05
-3.75977e-05	1.36719e-05	2.05078e-05	7.32422e-06	8.20313e-05	6.34766e-06	-8.39844e-05	1.2207e-05	0.000113281	1.75781e-05	3.02734e-05	4.15039e-05
-3.17383e-05	1.17188e-05	2.05078e-05	6.34766e-06	9.17969e-05	7.08008e-06	-4.98047e-05	1.36719e-05	0.000171875	1.85547e-05	2.73438e-05	4.15039e-05
-8.78906e-06	1.36719e-05	1.95313e-05	8.30078e-06	8.10547e-05	7.8125e-06	1.26953e-05	1.31836e-05	9.86328e-05	1.5625e-05	1.75781e-05	3.90625e-05
-1.70898e-05	1.26953e-05	2.24609e-05	7.8125e-06	4.10156e-05	6.34766e-06	3.90625e-06	1.07422e-05	4.6875e-05	1.75781e-05	8.78906e-06	4.39453e-05
1.75781e-05	1.5625e-05	2.24609e-05	7.8125e-06	2.14844e-05	6.83594e-06	-0.000108398	3.41797e-06	-0.000121094	1.75781e-05	9.76563e-07	3.90625e-05
3.02734e-05	1.66016e-05	2.44141e-05	8.30078e-06	1.85547e-05	8.54492e-06	-0.000141602	3.41797e-06	-0.000161133	1.75781e-05	-5.85938e-06	3.66211e-05
2.05078e-05	1.85547e-05	3.22266e-05	8.78906e-06	1.66016e-05	6.34766e-06	4.00391e-05	3.41797e-06	-0.000161133	1.66016e-05	3.80859e-05	3.41797e-05
1.5625e-05	1.5625e-05	3.90625e-06	9.76563e-06	6.83594e-06	6.10352e-06	0.000158203	7.8125e-06	-0.000160156	1.75781e-05	5.76172e-05	3.90625e-05
5.37109e-06	1.75781e-05	4.88281e-06	8.30078e-06	2.44141e-05	3.41797e-06	0.000202148	1.07422e-05	-9.86328e-05	1.36719e-05	3.80859e-05	3.66211e-05
4.88281e-07	1.5625e-05	1.46484e-05	8.78906e-06	3.61328e-05	3.17383e-06	1.5625e-05	1.17188e-05	-3.22266e-05	1.36719e-05	2.73438e-05	4.39453e-05
1.41602e-05	1.46484e-05	1.95313e-05	9.76563e-06	3.41797e-05	2.92969e-06	-1.95313e-05	1.2207e-05	6.44531e-05	1.5625e-05	2.44141e-05	4.39453e-05
1.5625e-05	1.66016e-05	2.53906e-05	8.30078e-06	2.92969e-05	2.44141e-06	6.83594e-06	1.12305e-05	0.000363281	1.75781e-05	-4.88281e-06	4.39453e-05
1.12305e-05	1.66016e-05	2.14844e-05	8.30078e-06	2.44141e-05	2.68555e-06	1.36719e-05	1.5625e-05	0.000519531	1.66016e-05	-2.63672e-05	4.39453e-05
1.12305e-05	1.66016e-05	1.17188e-05	9.27734e-06	2.05078e-05	3.41797e-06	2.34375e-05	1.31836e-05	0.000322266	1.5625e-05	-2.83203e-05	4.63867e-05
5.85938e-06	1.5625e-05	1.26953e-05	1.12305e-05	3.02734e-05	1.70898e-06	2.24609e-05	9.76563e-06	0.000133789	1.66016e-05	-5.27344e-05	4.15039e-05
5.37109e-06	1.26953e-05	1.36719e-05	9.76563e-06	3.125e-05	1.2207e-06	-9.76563e-07	7.32422e-06	-0.000172852	1.85547e-05	-8.30078e-05	4.15039e-05
3.90625e-06	1.46484e-05	1.46484e-05	1.02539e-05	3.02734e-05	-2.19727e-06	-1.95313e-06	5.37109e-06	-0.000328125	1.95313e-05	-7.71484e-05	4.39453e-05
1.95313e-06	1.75781e-05	1.85547e-05	1.02539e-05	3.125e-05	1.95313e-06	-8.78906e-06	6.83594e-06	-0.000287109	2.05078e-05	-3.80859e-05	4.39453e-05
-4.88281e-07	1.17188e-05	1.75781e-05	9.76563e-06	2.63672e-05	4.15039e-06	-1.66016e-05	7.32422e-06	-0.000234375	1.5625e-05	-9.76563e-07	4.15039e-05
4.88281e-07	1.17188e-05	1.66016e-05	6.34766e-06	2.83203e-05	2.19727e-06	-9.76563e-06	7.32422e-06	-9.66797e-05	1.75781e-05	3.22266e-05	4.15039e-05
4.88281e-07	1.17188e-05	1.85547e-05	7.8125e-06	2.92969e-05	-7.32422e-07	5.85938e-06	7.8125e-06	-3.90625e-06	1.5625e-05	4.00391e-05	3.66211e-05
1.95313e-06	1.36719e-05	1.85547e-05	7.8125e-06	3.02734e-05	-9.76563e-07	4.88281e-06	8.78906e-06	0.000139648	1.85547e-05	3.71094e-05	4.15039e-05
4.88281e-06	1.66016e-05	1.46484e-05	1.02539e-05	3.22266e-05	1.46484e-06	-5.85938e-06	8.78906e-06	0.000177734	1.5625e-05	4.00391e-05	4.15039e-05
6.34766e-06	1.85547e-05	1.36719e-05	8.78906e-06	3.22266e-05	2.92969e-06	0	9.27734e-06	0.000137695	1.95313e-05	3.90625e-05	4.15039e-05
7.8125e-06	1.66016e-05	1.26953e-05	1.07422e-05	2.92969e-05	1.95313e-06	2.24609e-05	8.30078e-06	0.000124023	1.85547e-05	8.78906e-06	4.15039e-05
7.8125e-06	1.17188e-05	1.5625e-05	9.76563e-06	3.125e-05	1.95313e-06	2.83203e-05	6.83594e-06	0.000149414	1.95313e-05	0.000155273	4.15039e-05
7.32422e-06	1.5625e-05	1.75781e-05	1.02539e-05	3.02734e-05	4.88281e-07	2.34375e-05	7.8125e-06	0.000173828	1.5625e-05	0.000255859	3.90625e-05
6.34766e-06	1.75781e-05	1.5625e-05	8.78906e-06	0.000109375	4.88281e-07	3.02734e-05	1.12305e-05	8.69141e-05	1.5625e-05	6.83594e-05	4.39453e-05
5.37109e-06	1.75781e-05	1.5625e-05	9.76563e-06	0.00015625	1.70898e-06	3.61328e-05	7.32422e-06	4.10156e-05	1.5625e-05	0.00012793	3.90625e-05
8.30078e-06	1.85547e-05	1.66016e-05	1.12305e-05	0.00021582	4.88281e-07	3.80859e-05	8.30078e-06	-1.36719e-05	1.66016e-05	0.000177734	3.66211e-05
2.09961e-05	1.85547e-05	1.36719e-05	9.27734e-06	5.66406e-05	-7.32422e-07	6.83594e-05	1.17188e-05	-7.22656e-05	1.5625e-05	1.95313e-06	3.66211e-05
2.14844e-05	1.95313e-05	1.36719e-05	8.78906e-06	2.92969e-06	-4.88281e-07	6.05469e-05	1.12305e-05	1.66016e-05	1.5625e-05	-0.000227539	3.90625e-05
1.41602e-05	1.75781e-05	1.46484e-05	7.8125e-06	0.000285156	-9.76563e-07	4.29687e-05	8.30078e-06	9.17969e-05	1.46484e-05	-0.000202148	3.90625e-05
1.12305e-05	1.75781e-05	1.46484e-05	7.8125e-06	0.000246094	-4.88281e-07	3.51562e-05	7.8125e-06	-3.02734e-05	1.66016e-05	-0.000224609	4.88281e-05
1.07422e-05	1.5625e-05	1.36719e-05	9.27734e-06	-0.000201172	-3.17383e-06	7.22656e-05	6.83594e-06	-3.32031e-05	1.66016e-05	-0.000402344	4.39453e-05
1.26953e-05	1.85547e-05	1.5625e-05	8.30078e-06	-0.000390625	-5.61523e-06	4.6875e-05	6.83594e-06	-1.07422e-05	1.5625e-05	-0.000246094	3.90625e-05
1.61133e-05	1.46484e-05	1.5625e-05	9.27734e-06	-0.000324219	-5.85938e-06	-3.22266e-05	6.34766e-06	-2.92969e-06	1.75781e-05	-9.57031e-05	3.17383e-05
8.78906e-06	1.66016e-05	1.36719e-05	9.27734e-06	-0.000213867	-1.2207e-06	-4.19922e-05	8.78906e-06	2.24609e-05	1.95313e-05	4.10156e-05	4.39453e-05
-1.95313e-06	1.85547e-05	1.46484e-05	7.8125e-06	-5.66406e-05	4.15039e-06	-2.05078e-05	1.07422e-05	5.07812e-05	1.85547e-05	8.20313e-05	4.39453e-05
-2.44141e-06	1.5625e-05	1.5625e-05	8.30078e-06	-8.39844e-05	9.0332e-06	-1.85547e-05	7.32422e-06	4.39453e-05	1.66016e-05	4.00391e-05	4.63867e-05
-1.46484e-06	1.46484e-05	1.66016e-05	8.30078e-06	-0.000118164	1.19629e-05	1.66016e-05	5.37109e-06	5.95703e-05	1.36719e-05	0.000230469	4.63867e-05
6.83594e-06	1.26953e-05	1.85547e-05	7.8125e-06	3.22266e-05	9.27734e-06	9.96094e-05	7.32422e-06	4.58984e-05	1.5625e-05	0.000666016	4.88281e-05
8.78906e-06	1.26953e-05	1.75781e-05	7.32422e-06	0.000181641	9.52148e-06	0.000112305	5.85938e-06	2.63672e-05	1.5625e-05	0.000568359	4.39453e-05
1.17188e-05	1.36719e-05	1.85547e-05	8.78906e-06	0.00015625	6.34766e-06	6.34766e-05	4.88281e-06	7.32422e-05	1.75781e-05	7.12891e-05	4.88281e-05
1.12305e-05	1.66016e-05	1.75781e-05	8.78906e-06	2.53906e-05	8.78906e-06	-1.85547e-05	6.34766e-06	7.8125e-05	1.5625e-05	-0.000208984	5.12695e-05
1.26953e-05	2.05078e-05	1.66016e-05	1.07422e-05	-4.00391e-05	8.54492e-06	-0.000107422	8.78906e-06	2.44141e-05	1.5625e-05	-0.000329102	5.37109e-05
1.2207e-05	2.05078e-05	1.66016e-05	8.78906e-06	-1.36719e-05	4.63867e-06	-3.125e-05	1.2207e-05	-4.10156e-05	1.46484e-05	-0.00018457	4.39453e-05
5.85938e-06	1.95313e-05	1.5625e-05	6.83594e-06	1.66016e-05	4.15039e-06	-9.17969e-05	1.17188e-05	-6.73828e-05	1.46484e-05	-1.66016e-05	4.15039e-05
-4.39453e-06	1.85547e-05	1.46484e-05	7.8125e-06	2.53906e-05	4.88281e-06	-1.95313e-06	1.07422e-05	0	1.26953e-05	-1.46484e-05	3.41797e-05
-3.90625e-06	1.66016e-05	1.46484e-05	7.8125e-06	3.125e-05	3.41797e-06	0.000172852	7.8125e-06	6.83594e-05	1.85547e-05	-8.49609e-05	3.41797e-05
1.95313e-06	1.66016e-05	1.5625e-05	5.85938e-06	1.07422e-05	5.12695e-06	0.000208984	6.83594e-06	0	1.5625e-05	-0.000157227	2.92969e-05
1.07422e-05	1.66016e-05	1.5625e-05	8.30078e-06	-8.78906e-06	7.32422e-06	0.000114258	5.37109e-06	-0.000186523	1.85547e-05	-0.000113281	3.41797e-05
2.83203e-05	1.66016e-05	1.85547e-05	9.27734e-06	-1.66016e-05	5.85938e-06	-8.78906e-06	5.85938e-06	-0.000208984	1.75781e-05	-3.90625e-06	3.90625e-05
4.10156e-05	1.46484e-05	1.5625e-05	1.02539e-05	-9.76563e-06	4.39453e-06	-3.41797e-05	7.8125e-06	-0.000183594	1.85547e-05	2.92969e-06	5.12695e-05
2.00195e-05	1.66016e-05	1.36719e-05	8.78906e-06	-1.85547e-05	5.12695e-06	-3.71094e-05	6.83594e-06	0.000134766	1.66016e-05	-8.69141e-05	4.63867e-05
1.95313e-06	1.66016e-05	1.66016e-05	9.76563e-06	-2.92969e-05	6.34766e-06	-2.24609e-05	8.30078e-06	0.000311523	1.66016e-05	7.8125e-06	5.12695e-05
-5.37109e-06	1.75781e-05	1.66016e-05	9.27734e-06	-3.32031e-05	7.08008e-06	9.76563e-05	9.27734e-06	0.000374023	1.85547e-05	0.000117187	4.39453e-05
-7.32422e-06	1.66016e-05	1.36719e-05	8.30078e-06	-2.73438e-05	7.32422e-06	0.000106445	7.8125e-06	0.000364258	1.95313e-05	0.00012793	4.63867e-05
-6.83594e-06	1.66016e-05	1.5625e-05	7.8125e-06	-4.78516e-05	5.85938e-06	5.76172e-05	6.83594e-06	0.000117187	1.75781e-05	7.42187e-05	4.39453e-05
-2.92969e-06	1.66016e-05	1.75781e-05	8.30078e-06	-7.03125e-05	6.5918e-06	-3.61328e-05	1.02539e-05	3.51562e-05	1.75781e-05	5.76172e-05	4.15039e-05
7.32422e-06	1.75781e-05	1.85547e-05	7.8125e-06	-1.75781e-05	4.88281e-06	-0.000116211	1.02539e-05	1.46484e-05	1.46484e-05	4.49219e-05	3.66211e-05
1.46484e-05	1.5625e-05	2.05078e-05	8.78906e-06	0.000161133	5.61523e-06	-0.000110352	1.12305e-05	-6.34766e-05	1.66016e-05	6.05469e-05	4.39453e-05
1.95313e-05	1.5625e-05	2.14844e-05	8.30078e-06	0.000152344	4.15039e-06	2.92969e-05	1.2207e-05	8.49609e-05	1.5625e-05	0	4.63867e-05
1.36719e-05	1.36719e-05	2.05078e-05	7.32422e-06	-2.92969e-05	5.12695e-06	7.61719e-05	1.17188e-05	-8.30078e-05	1.46484e-05	-3.32031e-05	5.12695e-05
7.32422e-06	1.5625e-05	-8.78906e-06	7.32422e-06	-8.78906e-05	5.37109e-06	5.37109e-05	7.8125e-06	-8.39844e-05	1.36719e-05	-4.39453e-05	4.39453e-05
3.41797e-06	1.66016e-05	-9.76563e-07	8.30078e-06	-2.63672e-05	6.34766e-06	1.17188e-05	5.85938e-06	-0.000241211	1.46484e-05	1.95313e-06	4.15039e-05
5.85938e-06	1.75781e-05	1.75781e-05	9.76563e-06	5.46875e-05	7.08008e-06	-4.88281e-05	3.41797e-06	-0.00040918	1.5625e-05	3.90625e-05	3.66211e-05
4.39453e-06	1.85547e-05	2.24609e-05	7.8125e-06	9.08203e-05	7.8125e-06	-7.61719e-05	4.39453e-06	-0.000401367	1.66016e-05	3.02734e-05	3.90625e-05
-1.26953e-05	1.85547e-05	2.14844e-05	8.78906e-06	8.39844e-05	8.54492e-06	-7.12891e-05	5.37109e-06	-0.000209961	1.66016e-05	1.85547e-05	4.39453e-05
-2.34375e-05	1.95313e-05	1.95313e-05	8.78906e-06	7.61719e-05	6.83594e-06	-2.34375e-05	5.85938e-06	0.000140625	2.14844e-05	4.88281e-05	4.39453e-05
-1.80664e-05	1.5625e-05	1.5625e-05	7.32422e-06	8.30078e-05	4.39453e-06	-4.00391e-05	5.37109e-06	0.000317383	2.34375e-05	5.85937e-05	3.17383e-05
1.12305e-05	1.46484e-05	1.26953e-05	8.78906e-06	0.000142578	2.19727e-06	5.56641e-05	8.78906e-06	0.000273438	2.14844e-05	3.22266e-05	3.17383e-05
4.83398e-05	1.46484e-05	1.26953e-05	8.30078e-06	6.83594e-05	3.17383e-06	0.000104492	1.17188e-05	0.000165039	1.75781e-05	-9.76563e-07	4.39453e-05
8.25195e-05	1.36719e-05	1.5625e-05	8.30078e-06	0.000318359	2.44141e-06	6.44531e-05	1.46484e-05	0.000321289	1.75781e-05	-2.34375e-05	5.37109e-05
5.76172e-05	1.46484e-05	2.14844e-05	7.8125e-06	0.000486328	1.46484e-06	9.27734e-05	1.61133e-05	0.000366211	1.66016e-05	-1.26953e-05	4.63867e-05
8.78906e-06	1.66016e-05	5.85938e-06	8.78906e-06	7.61719e-05	-1.46484e-06	0.000128906	1.61133e-05	7.51953e-05	1.85547e-05	2.05078e-05	3.90625e-05
-1.66016e-05	1.66016e-05	8.78906e-06	8.30078e-06	-0.000248047	-4.88281e-07	0.000204102	1.07422e-05	-0.000253906	1.75781e-05	2.53906e-05	3.17383e-05
-1.85547e-05	1.85547e-05	1.66016e-05	9.76563e-06	-0.000162109	-2.44141e-07	0.000198242	7.8125e-06	-0.000321289	1.85547e-05	4.29687e-05	3.66211e-05
-1.17188e-05	1.95313e-05	1.75781e-05	8.78906e-06	-6.64063e-05	2.44141e-07	-6.64063e-05	1.95313e-06	-0.000172852	2.14844e-05	4.19922e-05	3.17383e-05
-3.41797e-06	1.85547e-05	1.85547e-05	7.8125e-06	-6.54297e-05	0	-0.000345703	4.88281e-07	-0.00053125	2.34375e-05	5.07812e-05	3.66211e-05
1.95313e-06	1.5625e-05	1.85547e-05	7.8125e-06	-7.03125e-05	2.44141e-07	-0.000331055	1.46484e-06	-0.000639648	1.66016e-05	5.07812e-05	3.90625e-05
3.90625e-06	1.17188e-05	1.95313e-05	7.8125e-06	-4.88281e-05	1.46484e-06	-4.29687e-05	1.95313e-06	-0.000288086	1.85547e-05	4.6875e-05	4.15039e-05
3.41797e-06	1.26953e-05	1.5625e-05	6.34766e-06	-4.19922e-05	1.2207e-06	0.000141602	1.95313e-06	-5.07812e-05	1.5625e-05	3.71094e-05	3.90625e-05
6.83594e-06	1.66016e-05	6.83594e-06	5.85938e-06	-1.26953e-05	9.76563e-07	0.000147461	4.88281e-06	0.000299805	1.66016e-05	4.58984e-05	4.15039e-05
5.37109e-06	1.5625e-05	5.85938e-06	2.73438e-05	5.27344e-05	1.95313e-06	6.64063e-05	8.30078e-06	0.000563477	1.26953e-05	4.19922e-05	3.66211e-05
1.02539e-05	1.85547e-05	1.26953e-05	1.75781e-05	0.000104492	8.05664e-06	1.95313e-06	9.27734e-06	0.000571289	1.75781e-05	3.51562e-05	3.90625e-05
1.51367e-05	1.66016e-05	1.95313e-05	2.92969e-06	0.000100586	6.34766e-06	-7.51953e-05	1.26953e-05	0.000422852	1.66016e-05	1.85547e-05	3.90625e-05
2.24609e-05	1.66016e-05	2.05078e-05	-1.46484e-06	3.02734e-05	3.90625e-06	-0.000138672	1.80664e-05	0.000313477	1.36719e-05	1.85547e-05	4.39453e-05
1.66016e-05	1.5625e-05	2.14844e-05	2.44141e-06	0.00018457	-2.44141e-07	-0.00012793	1.75781e-05	0.000118164	1.26953e-05	1.66016e-05	4.15039e-05
1.07422e-05	1.66016e-05	1.95313e-05	4.88281e-06	0.000119141	-2.92969e-06	3.80859e-05	1.41602e-05	-0.000183594	1.75781e-05	4.49219e-05	4.39453e-05
9.76563e-06	1.75781e-05	1.75781e-05	7.8125e-06	4.00391e-05	-3.90625e-06	0.000185547	5.85938e-06	-0.000321289	1.75781e-05	4.00391e-05	3.90625e-05
1.12305e-05	1.95313e-05	1.66016e-05	9.27734e-06	-5.56641e-05	-1.2207e-06	0.000154297	3.41797e-06	-0.000245117	2.05078e-05	2.92969e-05	3.90625e-05
4.88281e-06	1.85547e-05	1.46484e-05	7.8125e-06	-0.000266602	2.44141e-07	-6.54297e-05	2.92969e-06	-0.000244141	1.95313e-05	1.75781e-05	4.15039e-05
4.88281e-06	1.75781e-05	1.46484e-05	6.83594e-06	-0.000203125	3.17383e-06	-0.000136719	3.90625e-06	-0.000164063	1.85547e-05	-9.76563e-06	4.63867e-05
1.07422e-05	1.5625e-05	1.85547e-05	7.8125e-06	9.76563e-06	2.44141e-06	-5.56641e-05	5.85938e-06	0.000124023	1.66016e-05	-1.07422e-05	4.15039e-05
8.30078e-06	1.36719e-05	2.14844e-05	9.76563e-06	7.61719e-05	1.70898e-06	7.61719e-05	1.02539e-05	0.000154297	1.95313e-05	2.44141e-05	4.15039e-05
-4.88281e-07	1.36719e-05	1.95313e-05	9.76563e-06	3.02734e-05	6.10352e-06	0.00012793	1.02539e-05	4.88281e-05	1.5625e-05	3.32031e-05	4.15039e-05
-9.27734e-06	1.36719e-05	1.36719e-05	8.78906e-06	-3.125e-05	9.52148e-06	0.000116211	1.17188e-05	3.61328e-05	1.75781e-05	3.71094e-05	4.15039e-05
-1.2207e-05	1.46484e-05	1.26953e-05	8.30078e-06	-3.125e-05	6.34766e-06	0.000108398	7.8125e-06	8.59375e-05	1.75781e-05	3.125e-05	3.90625e-05
-3.90625e-06	1.5625e-05	1.26953e-05	8.30078e-06	1.07422e-05	9.76563e-06	9.08203e-05	6.83594e-06	0.000140625	1.66016e-05	3.32031e-05	3.90625e-05
6.34766e-06	1.5625e-05	1.36719e-05	7.32422e-06	3.32031e-05	8.54492e-06	9.57031e-05	8.78906e-06	0.000191406	1.36719e-05	2.73438e-05	3.66211e-05
1.85547e-05	1.66016e-05	1.66016e-05	7.32422e-06	4.58984e-05	1.07422e-05	6.54297e-05	1.07422e-05	0.000144531	1.26953e-05	3.41797e-05	4.15039e-05
2.92969e-05	1.66016e-05	1.75781e-05	9.27734e-06	5.17578e-05	8.30078e-06	-2.92969e-06	1.17188e-05	0.000135742	1.26953e-05	3.22266e-05	3.90625e-05
3.51562e-05	1.46484e-05	1.5625e-05	6.83594e-06	0.00012793	5.85938e-06	-4.19922e-05	1.26953e-05	7.8125e-05	1.46484e-05	2.34375e-05	3.90625e-05
1.70898e-05	1.36719e-05	1.36719e-05	6.83594e-06	0.000148437	2.92969e-06	-9.76563e-07	1.02539e-05	5.56641e-05	1.36719e-05	-6.34766e-05	3.90625e-05
-7.32422e-06	1.36719e-05	2.24609e-05	7.32422e-06	5.27344e-05	2.68555e-06	0.000116211	6.34766e-06	6.64063e-05	1.75781e-05	-0.000172852	3.90625e-05
-9.27734e-06	1.46484e-05	2.14844e-05	6.83594e-06	-9.86328e-05	7.32422e-07	4.58984e-05	5.37109e-06	8.10547e-05	1.75781e-05	0.000355469	3.41797e-05
-4.88281e-07	1.75781e-05	1.85547e-05	9.27734e-06	-0.00015332	1.2207e-06	-4.98047e-05	9.27734e-06	9.08203e-05	1.66016e-05	0.000602539	3.17383e-05
0	1.66016e-05	1.75781e-05	9.27734e-06	-8.49609e-05	2.19727e-06	-7.8125e-05	7.8125e-06	9.375e-05	1.36719e-05	0.000263672	2.92969e-05
-9.76563e-07	1.75781e-05	1.66016e-05	7.8125e-06	4.88281e-06	1.70898e-06	-6.25e-05	8.78906e-06	0.000149414	1.5625e-05	0.000160156	2.92969e-05
2.92969e-06	1.85547e-05	1.75781e-05	7.8125e-06	8.00781e-05	1.95313e-06	-3.90625e-06	8.78906e-06	0.000196289	1.66016e-05	-0.000181641	3.17383e-05
9.76563e-07	1.75781e-05	1.5625e-05	5.37109e-06	8.30078e-05	1.95313e-06	1.5625e-05	9.76563e-06	9.66797e-05	1.46484e-05	-0.000342773	3.90625e-05
-1.17188e-05	1.5625e-05	1.66016e-05	8.78906e-06	6.93359e-05	1.46484e-06	1.95313e-06	9.27734e-06	-0.000101562	1.46484e-05	-0.000205078	3.90625e-05
2.44141e-06	1.26953e-05	1.5625e-05	9.27734e-06	2.24609e-05	3.66211e-06	2.14844e-05	1.02539e-05	-0.000254883	1.5625e-05	0.000128906	4.39453e-05
5.46875e-05	1.85547e-05	9.76563e-06	9.76563e-06	3.90625e-06	3.41797e-06	6.83594e-05	1.2207e-05	-5.27344e-05	1.46484e-05	0.000214844	4.39453e-05
4.93164e-05	1.95313e-05	9.76563e-06	8.78906e-06	2.05078e-05	7.32422e-06	9.86328e-05	8.78906e-06	0.000125977	1.66016e-05	8.78906e-05	4.88281e-05
2.73438e-05	1.66016e-05	1.17188e-05	7.8125e-06	5.46875e-05	8.78906e-06	9.66797e-05	9.27734e-06	3.41797e-05	1.5625e-05	-7.51953e-05	4.88281e-05
1.75781e-05	1.5625e-05	1.36719e-05	8.30078e-06	6.34766e-05	5.61523e-06	7.61719e-05	9.27734e-06	-7.32422e-05	1.75781e-05	-7.12891e-05	5.85937e-05
1.66016e-05	1.36719e-05	1.85547e-05	1.2207e-05	4.58984e-05	6.10352e-06	5.85937e-05	7.8125e-06	-7.12891e-05	1.26953e-05	-0.000125	5.85937e-05
4.88281e-06	8.78906e-06	2.14844e-05	8.78906e-06	1.75781e-05	7.32422e-06	4.10156e-05	7.8125e-06	0.000110352	1.66016e-05	-9.57031e-05	5.61523e-05
-2.34375e-05	1.26953e-05	1.66016e-05	5.85938e-06	4.88281e-06	5.85938e-06	2.24609e-05	6.83594e-06	-2.14844e-05	1.75781e-05	-0.000246094	4.88281e-05
-5.22461e-05	1.46484e-05	8.78906e-06	6.34766e-06	2.34375e-05	5.12695e-06	1.36719e-05	5.85938e-06	-8.00781e-05	1.5625e-05	-0.000138672	4.63867e-05
-3.71094e-05	1.66016e-05	8.78906e-06	1.02539e-05	3.80859e-05	1.46484e-06	8.78906e-06	8.30078e-06	0.000124023	1.46484e-05	-2.44141e-05	3.90625e-05
0	2.05078e-05	1.46484e-05	9.27734e-06	4.39453e-05	3.41797e-06	4.88281e-06	7.32422e-06	0.000264648	2.05078e-05	-0.000112305	4.39453e-05
2.68555e-05	1.95313e-05	1.85547e-05	7.32422e-06	2.92969e-05	4.15039e-06	0	7.8125e-06	0.000317383	1.66016e-05	-0.000121094	3.90625e-05
3.61328e-05	2.24609e-05	1.36719e-05	7.8125e-06	9.76563e-06	1.2207e-06	0	6.83594e-06	0.00018457	1.66016e-05	-5.85938e-06	3.66211e-05
3.02734e-05	1.95313e-05	7.8125e-06	1.12305e-05	-2.83203e-05	-2.92969e-06	8.78906e-06	6.83594e-06	6.05469e-05	1.5625e-05	0.000208984	3.17383e-05
2.14844e-05	1.66016e-05	1.5625e-05	8.30078e-06	-3.61328e-05	-7.32422e-07	5.85938e-06	6.83594e-06	-0.000211914	1.85547e-05	0.000395508	3.17383e-05
2.44141e-05	1.5625e-05	2.14844e-05	8.78906e-06	-3.32031e-05	7.32422e-07	1.17188e-05	7.32422e-06	-0.000386719	2.14844e-05	0.000246094	3.66211e-05
2.58789e-05	1.5625e-05	2.14844e-05	1.07422e-05	-1.85547e-05	1.2207e-06	1.36719e-05	6.34766e-06	-0.000364258	2.14844e-05	6.25e-05	3.66211e-05
1.85547e-05	1.95313e-05	2.24609e-05	1.02539e-05	-4.88281e-06	1.95313e-06	-6.83594e-06	4.88281e-06	-0.000269531	1.95313e-05	-6.44531e-05	3.17383e-05
1.26953e-05	1.46484e-05	3.22266e-05	6.83594e-06	4.88281e-06	4.15039e-06	-4.39453e-05	5.37109e-06	-0.000125	1.75781e-05	-2.63672e-05	4.63867e-05
5.85938e-06	1.26953e-05	3.32031e-05	2.44141e-06	1.17188e-05	2.68555e-06	-6.44531e-05	6.34766e-06	3.51562e-05	1.85547e-05	-0.000147461	5.12695e-05
5.37109e-06	1.26953e-05	2.14844e-05	9.76563e-07	1.5625e-05	2.19727e-06	-2.44141e-05	8.78906e-06	8.78906e-06	1.85547e-05	-0.000307617	5.61523e-05
4.88281e-06	1.36719e-05	7.8125e-06	2.44141e-06	2.24609e-05	2.68555e-06	7.32422e-05	5.85938e-06	-8.69141e-05	1.95313e-05	-0.00037793	6.34766e-05
1.95313e-06	1.46484e-05	9.76563e-07	4.88281e-07	2.24609e-05	3.17383e-06	0.000136719	2.44141e-06	-0.000169922	1.66016e-05	-0.000329102	6.10352e-05
2.44141e-06	1.46484e-05	0	4.39453e-06	6.83594e-06	3.66211e-06	9.86328e-05	4.88281e-06	-0.000237305	1.5625e-05	-0.000137695	5.12695e-05
0	1.5625e-05	4.49219e-05	1.66016e-05	-2.92969e-06	3.17383e-06	-8.00781e-05	8.30078e-06	-0.000141602	1.75781e-05	3.02734e-05	4.39453e-05
4.88281e-06	1.26953e-05	5.56641e-05	1.66016e-05	9.76563e-07	3.66211e-06	-0.00024707	1.07422e-05	1.26953e-05	1.5625e-05	7.12891e-05	4.39453e-05
8.78906e-06	1.75781e-05	1.46484e-05	1.12305e-05	5.85938e-06	1.95313e-06	-0.000126953	1.02539e-05	0.000238281	1.46484e-05	0.000145508	4.15039e-05
7.8125e-06	1.95313e-05	8.78906e-06	9.27734e-06	1.07422e-05	2.68555e-06	4.58984e-05	1.2207e-05	0.000259766	1.66016e-05	0.000106445	3.17383e-05
8.30078e-06	2.24609e-05	2.44141e-05	9.76563e-06	2.34375e-05	1.95313e-06	0.000113281	1.17188e-05	0.000220703	1.85547e-05	4.98047e-05	3.90625e-05
7.8125e-06	2.05078e-05	2.34375e-05	9.27734e-06	3.90625e-05	4.88281e-07	9.375e-05	8.30078e-06	9.47266e-05	1.95313e-05	7.8125e-05	4.15039e-05
6.83594e-06	1.85547e-05	1.85547e-05	3.41797e-06	4.6875e-05	3.17383e-06	8.00781e-05	5.85938e-06	4.39453e-05	2.14844e-05	6.15234e-05	3.90625e-05
6.83594e-06	1.85547e-05	1.85547e-05	9.27734e-06	4.6875e-05	1.2207e-06	7.22656e-05	6.83594e-06	-2.24609e-05	2.14844e-05	8.98437e-05	3.90625e-05
6.34766e-06	1.95313e-05	9.76563e-06	1.2207e-05	3.02734e-05	6.10352e-06	4.98047e-05	7.8125e-06	-0.000112305	1.85547e-05	3.80859e-05	3.66211e-05
8.78906e-06	1.85547e-05	3.90625e-06	1.46484e-06	6.83594e-06	3.41797e-06	3.51562e-05	6.83594e-06	-8.00781e-05	1.75781e-05	0.000126953	3.66211e-05
8.30078e-06	1.26953e-05	1.36719e-05	1.46484e-06	-1.85547e-05	1.2207e-06	6.64063e-05	7.32422e-06	0.000101562	1.75781e-05	8.39844e-05	4.15039e-05
6.83594e-06	1.07422e-05	2.05078e-05	8.30078e-06	-3.41797e-05	0	4.10156e-05	5.37109e-06	0.000199219	1.5625e-05	0.000117187	4.15039e-05
6.34766e-06	1.26953e-05	2.44141e-05	1.02539e-05	-3.80859e-05	1.70898e-06	1.66016e-05	4.88281e-06	0.000111328	1.85547e-05	-1.26953e-05	4.15039e-05
7.8125e-06	1.26953e-05	2.24609e-05	7.32422e-06	-2.73438e-05	3.17383e-06	-1.17188e-05	5.85938e-06	-6.73828e-05	1.46484e-05	-5.66406e-05	3.90625e-05
6.83594e-06	1.46484e-05	3.90625e-06	6.34766e-06	9.76563e-07	2.92969e-06	-3.61328e-05	9.27734e-06	-0.000230469	1.5625e-05	0.000109375	3.90625e-05
6.83594e-06	1.85547e-05	1.36719e-05	7.8125e-06	2.34375e-05	2.92969e-06	-2.63672e-05	1.31836e-05	-0.000200195	1.46484e-05	6.93359e-05	3.66211e-05
7.32422e-06	1.85547e-05	2.83203e-05	1.70898e-05	3.41797e-05	4.39453e-06	-5.07812e-05	9.76563e-06	-0.000101562	1.75781e-05	4.6875e-05	4.15039e-05
6.83594e-06	1.66016e-05	5.17578e-05	1.85547e-05	4.29687e-05	4.63867e-06	-1.07422e-05	9.76563e-06	-0.000191406	1.66016e-05	9.76563e-07	3.90625e-05
7.32422e-06	1.66016e-05	4.98047e-05	8.78906e-06	4.39453e-05	4.15039e-06	-3.71094e-05	9.27734e-06	-0.000143555	1.85547e-05	-3.90625e-06	3.66211e-05
4.88281e-06	1.5625e-05	2.53906e-05	3.90625e-06	2.92969e-06	1.95313e-06	-0.000145508	8.30078e-06	0.000117187	1.46484e-05	-5.85937e-05	2.92969e-05
3.90625e-06	1.66016e-05	-1.85547e-05	3.41797e-06	6.25e-05	3.17383e-06	-0.000157227	7.32422e-06	0.000456055	1.66016e-05	-0.000108398	3.66211e-05
5.37109e-06	1.66016e-05	-1.95313e-05	1.2207e-05	9.17969e-05	7.32422e-07	3.51562e-05	7.8125e-06	0.000574219	1.5625e-05	2.83203e-05	3.90625e-05
4.88281e-06	1.66016e-05	-1.95313e-06	1.2207e-05	0.000140625	1.95313e-06	0.000165039	1.02539e-05	0.000242187	1.85547e-05	0.000266602	3.66211e-05
5.37109e-06	1.36719e-05	1.07422e-05	1.5625e-05	5.95703e-05	9.76563e-07	0.000163086	1.12305e-05	-0.000231445	1.5625e-05	0.000296875	2.92969e-05
6.34766e-06	1.66016e-05	1.95313e-05	1.95313e-05	-1.5625e-05	2.44141e-06	0.000131836	1.26953e-05	-0.000350586	1.66016e-05	0.000254883	3.41797e-05
5.85938e-06	1.85547e-05	1.36719e-05	1.61133e-05	-6.83594e-05	5.12695e-06	8.59375e-05	6.34766e-06	-0.0003125	1.36719e-05	0.000108398	3.90625e-05
4.88281e-06	1.5625e-05	6.83594e-06	1.07422e-05	-3.71094e-05	3.17383e-06	3.02734e-05	7.8125e-06	-0.000270508	1.66016e-05	6.83594e-06	5.37109e-05
6.34766e-06	1.75781e-05	9.76563e-06	9.76563e-06	6.83594e-06	3.66211e-06	-3.125e-05	7.8125e-06	-9.86328e-05	1.5625e-05	-4.78516e-05	5.37109e-05
5.85938e-06	1.75781e-05	1.17188e-05	7.32422e-06	1.17188e-05	6.83594e-06	-3.32031e-05	7.32422e-06	0.000205078	1.66016e-05	-4.00391e-05	5.12695e-05
6.34766e-06	1.5625e-05	1.17188e-05	6.83594e-06	-8.20313e-05	5.61523e-06	2.92969e-06	7.8125e-06	0.000382813	1.5625e-05	-1.07422e-05	3.90625e-05
6.83594e-06	1.46484e-05	9.76563e-06	8.30078e-06	-6.34766e-05	5.61523e-06	3.22266e-05	9.27734e-06	0.000348633	1.36719e-05	4.88281e-06	3.90625e-05
7.8125e-06	1.66016e-05	8.78906e-06	8.78906e-06	1.36719e-05	5.12695e-06	3.71094e-05	8.78906e-06	5.76172e-05	1.26953e-05	-6.83594e-06	3.41797e-05
5.85938e-06	1.75781e-05	9.76563e-06	8.30078e-06	2.05078e-05	4.63867e-06	2.34375e-05	7.32422e-06	-1.75781e-05	1.36719e-05	3.90625e-06	3.90625e-05
5.37109e-06	1.66016e-05	1.07422e-05	1.02539e-05	2.14844e-05	4.15039e-06	-2.53906e-05	9.27734e-06	9.08203e-05	1.46484e-05	3.02734e-05	3.41797e-05
4.39453e-06	1.66016e-05	7.8125e-06	8.78906e-06	-1.66016e-05	1.70898e-06	-4.88281e-05	8.78906e-06	0.000266602	1.5625e-05	1.17188e-05	4.15039e-05
6.83594e-06	1.46484e-05	8.78906e-06	9.76563e-06	-0.000249023	2.44141e-07	-1.85547e-05	7.32422e-06	0.000303711	1.66016e-05	-1.46484e-05	4.15039e-05
9.27734e-06	1.46484e-05	9.76563e-06	1.12305e-05	-0.000157227	3.90625e-06	4.10156e-05	8.78906e-06	8.59375e-05	1.66016e-05	-2.34375e-05	4.39453e-05
9.27734e-06	2.05078e-05	9.76563e-06	7.8125e-06	0.000144531	2.68555e-06	6.05469e-05	8.78906e-06	-0.000251953	1.95313e-05	-2.73438e-05	3.90625e-05
8.78906e-06	2.05078e-05	1.17188e-05	9.76563e-06	0.000229492	2.19727e-06	6.05469e-05	9.76563e-06	-0.00031543	1.95313e-05	-1.75781e-05	3.90625e-05
1.12305e-05	2.05078e-05	1.07422e-05	1.36719e-05	9.57031e-05	7.32422e-07	5.27344e-05	1.02539e-05	-0.000226563	1.75781e-05	-2.92969e-06	3.66211e-05
1.26953e-05	1.75781e-05	1.46484e-05	9.27734e-06	-4.49219e-05	1.46484e-06	3.71094e-05	1.02539e-05	-0.000192383	1.95313e-05	7.8125e-06	4.63867e-05
1.07422e-05	1.36719e-05	1.5625e-05	7.8125e-06	-3.41797e-05	2.44141e-06	1.46484e-05	8.30078e-06	-0.000148437	1.5625e-05	-2.73438e-05	4.39453e-05
8.78906e-06	1.26953e-05	1.85547e-05	5.85938e-06	0.000163086	6.10352e-06	8.78906e-06	1.12305e-05	-5.85937e-05	1.66016e-05	-3.02734e-05	4.88281e-05
7.32422e-06	1.5625e-05	1.5625e-05	8.30078e-06	0.000125977	6.34766e-06	1.85547e-05	8.78906e-06	0.000116211	1.5625e-05	-1.26953e-05	4.15039e-05
7.32422e-06	1.5625e-05	1.17188e-05	6.34766e-06	3.22266e-05	1.26953e-05	2.05078e-05	5.37109e-06	0.000176758	2.05078e-05	1.95313e-06	4.63867e-05
7.32422e-06	1.5625e-05	1.26953e-05	4.39453e-06	3.125e-05	1.44043e-05	3.22266e-05	9.76563e-06	9.86328e-05	1.95313e-05	5.85938e-06	4.15039e-05
8.30078e-06	1.66016e-05	1.66016e-05	6.83594e-06	1.26953e-05	9.76563e-06	3.22266e-05	5.37109e-06	0.000130859	1.95313e-05	1.07422e-05	4.15039e-05
8.30078e-06	1.5625e-05	1.5625e-05	8.78906e-06	7.61719e-05	7.08008e-06	1.46484e-05	2.92969e-06	0.000110352	1.66016e-05	9.76563e-06	3.90625e-05
9.27734e-06	1.75781e-05	1.36719e-05	8.30078e-06	7.32422e-05	7.08008e-06	5.17578e-05	4.88281e-06	-1.95313e-06	1.75781e-05	1.75781e-05	4.15039e-05
9.76563e-06	1.75781e-05	1.46484e-05	7.8125e-06	-5.85938e-06	6.10352e-06	4.58984e-05	5.85938e-06	3.61328e-05	1.36719e-05	2.05078e-05	4.15039e-05
6.83594e-06	1.75781e-05	1.75781e-05	5.85938e-06	-8.39844e-05	6.34766e-06	-1.66016e-05	8.78906e-06	2.34375e-05	1.66016e-05	1.85547e-05	4.39453e-05
9.76563e-06	1.95313e-05	2.05078e-05	4.88281e-06	-8.39844e-05	3.90625e-06	-9.66797e-05	1.07422e-05	0.000147461	1.66016e-05	4.00391e-05	3.90625e-05
9.76563e-06	1.66016e-05	2.24609e-05	5.37109e-06	2.14844e-05	2.44141e-06	-3.61328e-05	1.17188e-05	0.000349609	1.75781e-05	0.000105469	3.90625e-05
8.78906e-06	1.66016e-05	2.24609e-05	5.37109e-06	7.42187e-05	2.68555e-06	5.76172e-05	1.02539e-05	0.000124023	1.75781e-05	6.34766e-05	3.90625e-05
7.8125e-06	1.75781e-05	2.05078e-05	6.34766e-06	8.00781e-05	9.76563e-07	9.57031e-05	8.78906e-06	-8.88672e-05	1.75781e-05	9.375e-05	3.90625e-05
9.27734e-06	1.75781e-05	2.05078e-05	6.83594e-06	0.000134766	1.2207e-06	8.69141e-05	1.02539e-05	-0.000157227	1.95313e-05	0.000118164	3.66211e-05
8.78906e-06	1.66016e-05	1.85547e-05	5.85938e-06	8.98437e-05	1.70898e-06	3.90625e-05	1.26953e-05	-8.88672e-05	1.95313e-05	-5.37109e-05	3.41797e-05
1.02539e-05	1.66016e-05	1.95313e-05	8.78906e-06	2.05078e-05	1.2207e-06	3.22266e-05	1.26953e-05	-7.71484e-05	1.26953e-05	-0.000118164	2.92969e-05
1.26953e-05	1.5625e-05	2.05078e-05	5.85938e-06	8.20313e-05	3.41797e-06	9.47266e-05	1.17188e-05	-1.5625e-05	1.66016e-05	0.000146484	4.39453e-05
1.12305e-05	1.66016e-05	1.95313e-05	7.32422e-06	-7.8125e-06	4.15039e-06	5.17578e-05	6.83594e-06	2.14844e-05	1.46484e-05	0.000208008	5.12695e-05
9.76563e-06	1.66016e-05	1.85547e-05	5.37109e-06	-0.000113281	5.85938e-06	9.76563e-07	8.30078e-06	2.24609e-05	1.95313e-05	0.000126953	4.88281e-05
8.78906e-06	1.75781e-05	1.75781e-05	5.85938e-06	-5.17578e-05	6.34766e-06	3.51562e-05	9.27734e-06	4.19922e-05	1.5625e-05	1.95313e-05	3.90625e-05
8.30078e-06	1.66016e-05	1.75781e-05	6.34766e-06	3.125e-05	7.32422e-06	-3.61328e-05	7.32422e-06	3.32031e-05	1.85547e-05	-2.24609e-05	3.66211e-05
7.8125e-06	1.66016e-05	1.85547e-05	7.8125e-06	3.02734e-05	9.52148e-06	-9.86328e-05	6.34766e-06	7.32422e-05	1.85547e-05	-2.83203e-05	4.15039e-05
7.8125e-06	1.75781e-05	2.05078e-05	7.8125e-06	4.88281e-06	9.27734e-06	-6.93359e-05	6.83594e-06	8.30078e-05	1.85547e-05	-1.5625e-05	4.15039e-05
7.8125e-06	1.85547e-05	1.95313e-05	8.78906e-06	9.76563e-06	6.5918e-06	-1.36719e-05	7.8125e-06	8.69141e-05	1.75781e-05	-7.12891e-05	3.90625e-05
8.30078e-06	1.66016e-05	1.95313e-05	6.83594e-06	4.10156e-05	4.63867e-06	3.71094e-05	7.32422e-06	6.34766e-05	1.75781e-05	-0.000133789	3.90625e-05
8.30078e-06	1.46484e-05	1.95313e-05	6.83594e-06	6.93359e-05	3.66211e-06	5.76172e-05	7.32422e-06	6.25e-05	1.66016e-05	-7.51953e-05	3.90625e-05
8.78906e-06	1.5625e-05	1.95313e-05	9.27734e-06	6.93359e-05	2.44141e-06	3.71094e-05	8.30078e-06	9.96094e-05	1.75781e-05	1.07422e-05	4.63867e-05
9.76563e-06	1.85547e-05	1.85547e-05	6.83594e-06	-6.83594e-06	4.15039e-06	-5.85938e-06	9.27734e-06	6.54297e-05	1.66016e-05	2.53906e-05	4.88281e-05
8.78906e-06	1.66016e-05	1.85547e-05	6.34766e-06	0.000101562	2.19727e-06	-4.78516e-05	9.27734e-06	3.22266e-05	1.5625e-05	-1.07422e-05	4.88281e-05
7.8125e-06	1.75781e-05	1.95313e-05	7.32422e-06	3.125e-05	-4.88281e-07	-7.8125e-06	1.12305e-05	1.46484e-05	1.5625e-05	-3.61328e-05	4.15039e-05
8.78906e-06	1.95313e-05	1.95313e-05	6.83594e-06	-2.24609e-05	-4.88281e-07	3.32031e-05	1.07422e-05	1.75781e-05	1.5625e-05	-2.24609e-05	4.15039e-05
7.8125e-06	1.66016e-05	1.75781e-05	8.30078e-06	7.8125e-06	-1.70898e-06	5.66406e-05	9.76563e-06	1.26953e-05	1.46484e-05	-1.5625e-05	3.90625e-05
9.27734e-06	1.66016e-05	1.75781e-05	7.8125e-06	-3.32031e-05	-1.46484e-06	5.56641e-05	7.8125e-06	0	1.66016e-05	-3.90625e-05	4.15039e-05
1.07422e-05	1.5625e-05	1.95313e-05	8.78906e-06	-1.85547e-05	0	1.46484e-05	8.78906e-06	-7.8125e-06	1.36719e-05	6.05469e-05	4.15039e-05
1.2207e-05	1.75781e-05	1.66016e-05	6.83594e-06	7.03125e-05	-1.2207e-06	-7.8125e-06	7.8125e-06	-1.07422e-05	1.85547e-05	0.000180664	4.39453e-05
1.07422e-05	1.75781e-05	2.05078e-05	9.27734e-06	2.53906e-05	-7.32422e-07	1.46484e-05	5.37109e-06	-1.07422e-05	1.5625e-05	0.000105469	3.66211e-05
8.78906e-06	1.5625e-05	2.14844e-05	8.78906e-06	-4.78516e-05	2.44141e-06	1.75781e-05	5.37109e-06	-7.8125e-06	1.85547e-05	-3.80859e-05	3.90625e-05
1.07422e-05	1.75781e-05	1.66016e-05	9.76563e-06	-6.05469e-05	3.17383e-06	-2.44141e-05	5.37109e-06	-5.85938e-06	1.66016e-05	-8.30078e-05	3.41797e-05
1.2207e-05	1.5625e-05	1.75781e-05	9.76563e-06	-5.07812e-05	4.63867e-06	-6.73828e-05	9.27734e-06	-2.92969e-06	1.75781e-05	-9.08203e-05	4.15039e-05
1.2207e-05	1.75781e-05	1.5625e-05	8.30078e-06	-3.71094e-05	6.83594e-06	-2.92969e-05	7.32422e-06	-4.88281e-06	1.36719e-05	-3.02734e-05	4.15039e-05
1.02539e-05	1.66016e-05	1.66016e-05	8.78906e-06	-3.71094e-05	1.00098e-05	5.07812e-05	7.32422e-06	-8.78906e-06	1.75781e-05	1.95313e-06	4.39453e-05
8.30078e-06	1.46484e-05	1.5625e-05	8.30078e-06	-8.49609e-05	8.54492e-06	8.49609e-05	6.83594e-06	-1.46484e-05	1.5625e-05	7.22656e-05	3.90625e-05
5.85938e-06	1.75781e-05	1.46484e-05	5.85938e-06	1.17188e-05	3.17383e-06	-7.8125e-06	6.83594e-06	-2.92969e-06	1.66016e-05	5.85937e-05	4.39453e-05
-5.37109e-06	1.66016e-05	1.75781e-05	8.78906e-06	0.000141602	1.95313e-06	-2.14844e-05	9.27734e-06	3.90625e-05	1.75781e-05	0.00012793	4.39453e-05
-1.26953e-05	1.5625e-05	1.95313e-05	9.27734e-06	-9.76563e-07	-9.76563e-07	3.41797e-05	1.12305e-05	5.46875e-05	1.85547e-05	0.000289062	4.88281e-05
-1.2207e-05	1.5625e-05	1.75781e-05	8.78906e-06	0.000120117	-2.44141e-06	2.83203e-05	1.51367e-05	-4.88281e-06	1.5625e-05	3.22266e-05	4.15039e-05
4.88281e-07	1.5625e-05	1.46484e-05	8.78906e-06	9.08203e-05	-2.92969e-06	2.83203e-05	1.46484e-05	-3.80859e-05	1.75781e-05	-2.44141e-05	4.39453e-05
2.14844e-05	1.66016e-05	1.36719e-05	9.76563e-06	-1.46484e-05	-7.32422e-07	1.95313e-05	1.26953e-05	-3.90625e-06	1.26953e-05	0.000169922	4.15039e-05
3.41797e-05	1.66016e-05	1.66016e-05	1.07422e-05	-8.69141e-05	3.41797e-06	2.92969e-06	1.02539e-05	1.95313e-05	1.36719e-05	3.02734e-05	4.15039e-05
1.46484e-05	1.66016e-05	1.85547e-05	1.02539e-05	-7.51953e-05	1.2207e-06	1.95313e-05	7.8125e-06	8.78906e-06	1.75781e-05	-0.000251953	3.66211e-05
-1.51367e-05	1.66016e-05	1.66016e-05	8.30078e-06	-5.46875e-05	-1.2207e-06	0.000113281	6.34766e-06	5.85938e-06	1.85547e-05	-0.000123047	3.66211e-05
-4.05273e-05	1.85547e-05	1.26953e-05	8.78906e-06	-6.44531e-05	0	0.000160156	1.95313e-06	1.36719e-05	1.5625e-05	0.00024707	3.90625e-05
-5.32227e-05	1.66016e-05	1.66016e-05	8.30078e-06	-4.19922e-05	1.95313e-06	8.69141e-05	0	9.76563e-06	1.85547e-05	0.000114258	4.88281e-05
-4.10156e-05	1.26953e-05	1.85547e-05	9.27734e-06	-9.76563e-06	5.37109e-06	-4.49219e-05	3.41797e-06	-7.22656e-05	1.66016e-05	-8.10547e-05	4.88281e-05
3.80859e-05	1.26953e-05	1.66016e-05	8.30078e-06	4.6875e-05	5.12695e-06	-0.000176758	6.34766e-06	-6.64063e-05	1.95313e-05	-0.000239258	4.88281e-05
0.000118164	1.26953e-05	1.5625e-05	9.27734e-06	0.000107422	6.10352e-06	-0.000207031	7.32422e-06	5.56641e-05	1.85547e-05	2.34375e-05	5.12695e-05
0.000119141	1.26953e-05	1.66016e-05	8.30078e-06	0.00012207	9.0332e-06	-4.78516e-05	8.78906e-06	9.08203e-05	1.66016e-05	-1.95313e-05	4.39453e-05
5.61523e-05	1.66016e-05	1.36719e-05	9.27734e-06	0.000114258	6.83594e-06	7.42187e-05	5.85938e-06	-0.000103516	1.36719e-05	-0.000227539	3.17383e-05
-9.27734e-06	1.5625e-05	1.46484e-05	9.27734e-06	9.96094e-05	6.83594e-06	0.000113281	1.2207e-05	-0.000204102	1.85547e-05	-9.08203e-05	3.41797e-05
-4.05273e-05	1.5625e-05	1.46484e-05	8.78906e-06	7.32422e-05	6.10352e-06	0.000125	1.26953e-05	-0.000123047	1.66016e-05	0.000234375	3.41797e-05
-3.36914e-05	1.66016e-05	1.46484e-05	7.8125e-06	4.6875e-05	2.19727e-06	6.64063e-05	1.2207e-05	-0.000183594	1.85547e-05	0.000351562	2.92969e-05
-1.07422e-05	1.46484e-05	1.66016e-05	8.78906e-06	3.22266e-05	1.46484e-06	-2.92969e-05	1.12305e-05	3.125e-05	1.66016e-05	0.00050293	2.68555e-05
2.44141e-06	1.66016e-05	1.5625e-05	9.27734e-06	2.92969e-05	2.92969e-06	-8.39844e-05	1.36719e-05	0.000290039	1.95313e-05	0.000375977	3.41797e-05
-5.37109e-06	1.5625e-05	1.66016e-05	7.8125e-06	0.000144531	5.85938e-06	-6.05469e-05	1.07422e-05	0.000224609	1.85547e-05	0.000270508	3.90625e-05
-1.61133e-05	1.36719e-05	1.5625e-05	8.30078e-06	0.000200195	6.83594e-06	2.63672e-05	1.17188e-05	0.000143555	1.85547e-05	7.03125e-05	5.12695e-05
-1.36719e-05	1.36719e-05	1.66016e-05	8.78906e-06	5.07812e-05	4.88281e-06	5.66406e-05	6.83594e-06	8.88672e-05	1.5625e-05	-0.000195313	4.88281e-05
4.39453e-06	1.66016e-05	1.66016e-05	8.30078e-06	-0.000150391	4.88281e-06	7.12891e-05	3.90625e-06	1.66016e-05	1.75781e-05	-0.000361328	5.12695e-05
1.9043e-05	1.46484e-05	1.66016e-05	9.27734e-06	-7.12891e-05	4.88281e-07	2.73438e-05	1.95313e-06	1.66016e-05	1.75781e-05	-0.000348633	5.37109e-05
3.27148e-05	1.5625e-05	1.75781e-05	8.78906e-06	4.58984e-05	-2.68555e-06	7.32422e-05	1.46484e-06	1.85547e-05	1.95313e-05	-0.00012793	5.37109e-05
3.95508e-05	1.66016e-05	1.66016e-05	8.30078e-06	-4.58984e-05	-2.44141e-07	0.000120117	1.95313e-06	3.61328e-05	1.75781e-05	1.36719e-05	4.88281e-05
3.36914e-05	1.26953e-05	1.66016e-05	8.30078e-06	-0.000132813	3.17383e-06	8.39844e-05	4.88281e-06	2.92969e-06	1.85547e-05	4.88281e-05	4.63867e-05
1.66016e-05	1.26953e-05	1.46484e-05	9.27734e-06	-0.000126953	2.68555e-06	-7.61719e-05	7.32422e-06	-7.32422e-05	1.5625e-05	-6.05469e-05	4.15039e-05
7.32422e-06	1.36719e-05	1.5625e-05	9.27734e-06	-4.58984e-05	5.37109e-06	-0.000137695	1.12305e-05	-0.000140625	1.5625e-05	-0.000175781	3.66211e-05
0	1.46484e-05	1.66016e-05	7.32422e-06	2.05078e-05	5.12695e-06	-6.15234e-05	1.02539e-05	-8.49609e-05	1.5625e-05	-0.000206055	3.90625e-05
-2.44141e-06	1.66016e-05	1.46484e-05	7.8125e-06	4.78516e-05	5.61523e-06	5.56641e-05	1.07422e-05	-1.46484e-05	1.75781e-05	-9.08203e-05	4.39453e-05
5.85938e-06	1.46484e-05	1.66016e-05	8.30078e-06	5.46875e-05	6.10352e-06	0.000148437	1.12305e-05	9.08203e-05	1.5625e-05	-2.83203e-05	4.63867e-05
1.36719e-05	1.75781e-05	1.5625e-05	9.27734e-06	6.05469e-05	5.85938e-06	-9.76563e-06	1.02539e-05	0.000166992	1.85547e-05	5.66406e-05	5.12695e-05
1.95313e-05	1.85547e-05	1.46484e-05	1.02539e-05	7.91016e-05	6.34766e-06	-7.51953e-05	1.02539e-05	0.000179687	1.85547e-05	3.41797e-05	4.63867e-05
2.24609e-05	1.66016e-05	1.66016e-05	9.27734e-06	0.000117187	6.34766e-06	-1.95313e-06	7.8125e-06	1.95313e-06	1.95313e-05	2.92969e-05	4.15039e-05
1.85547e-05	1.75781e-05	1.66016e-05	8.78906e-06	0.000116211	4.15039e-06	-8.78906e-06	1.17188e-05	-2.92969e-06	1.46484e-05	-9.76563e-07	4.15039e-05
1.51367e-05	1.66016e-05	1.46484e-05	7.8125e-06	4.10156e-05	2.92969e-06	-3.32031e-05	1.07422e-05	-3.125e-05	1.85547e-05	-2.53906e-05	4.39453e-05
1.17188e-05	1.66016e-05	1.46484e-05	9.27734e-06	-3.80859e-05	4.88281e-07	6.83594e-06	1.26953e-05	-7.03125e-05	1.95313e-05	-5.46875e-05	3.90625e-05
3.90625e-06	1.46484e-05	1.66016e-05	6.34766e-06	-5.07812e-05	9.76563e-07	2.92969e-05	1.12305e-05	-2.14844e-05	1.95313e-05	-5.27344e-05	3.90625e-05
9.76563e-07	1.66016e-05	1.75781e-05	1.02539e-05	-1.85547e-05	-7.32422e-07	3.51562e-05	9.76563e-06	9.08203e-05	1.66016e-05	-2.24609e-05	3.66211e-05
0	1.5625e-05	1.66016e-05	8.78906e-06	8.78906e-06	7.32422e-07	3.71094e-05	8.30078e-06	0.000157227	1.66016e-05	1.95313e-06	3.66211e-05
2.44141e-06	1.75781e-05	1.75781e-05	8.78906e-06	6.54297e-05	1.46484e-06	3.61328e-05	6.34766e-06	8.69141e-05	1.75781e-05	7.8125e-06	3.90625e-05
3.90625e-06	1.5625e-05	1.5625e-05	7.8125e-06	9.86328e-05	1.46484e-06	3.90625e-05	8.30078e-06	0.00015332	1.85547e-05	4.88281e-06	4.63867e-05
7.8125e-06	1.66016e-05	1.66016e-05	8.78906e-06	0.000205078	3.17383e-06	3.32031e-05	7.32422e-06	0.000169922	1.5625e-05	-1.95313e-06	3.90625e-05
8.78906e-06	1.5625e-05	1.75781e-05	8.30078e-06	5.17578e-05	1.95313e-06	2.53906e-05	8.78906e-06	1.66016e-05	1.5625e-05	8.78906e-06	4.15039e-05
8.30078e-06	1.46484e-05	1.5625e-05	9.27734e-06	-0.00019043	1.2207e-06	1.85547e-05	7.8125e-06	-5.46875e-05	1.75781e-05	9.76563e-07	4.15039e-05
4.88281e-06	1.75781e-05	1.75781e-05	9.27734e-06	-0.000283203	2.19727e-06	2.24609e-05	8.78906e-06	-0.000124023	1.75781e-05	3.90625e-06	4.63867e-05
2.92969e-06	1.75781e-05	1.5625e-05	7.8125e-06	-0.000120117	2.68555e-06	2.53906e-05	1.07422e-05	-0.000135742	1.46484e-05	5.85938e-06	4.15039e-05
1.95313e-06	1.5625e-05	1.36719e-05	8.30078e-06	-7.8125e-06	3.90625e-06	2.53906e-05	1.02539e-05	7.8125e-06	1.66016e-05	1.75781e-05	4.15039e-05
2.92969e-06	1.66016e-05	1.5625e-05	7.8125e-06	1.5625e-05	5.12695e-06	2.44141e-05	9.27734e-06	8.88672e-05	1.46484e-05	2.73438e-05	4.15039e-05
4.88281e-06	1.85547e-05	1.85547e-05	8.30078e-06	5.07812e-05	3.90625e-06	2.73438e-05	9.27734e-06	0.000101562	1.36719e-05	4.00391e-05	4.15039e-05
4.39453e-06	1.85547e-05	1.85547e-05	7.32422e-06	3.90625e-05	2.92969e-06	2.83203e-05	9.27734e-06	0.000196289	1.46484e-05	4.49219e-05	3.90625e-05
5.85938e-06	1.75781e-05	5.85938e-06	8.78906e-06	1.95313e-05	3.66211e-06	2.73438e-05	9.76563e-06	0.000145508	1.75781e-05	5.46875e-05	3.90625e-05
4.39453e-06	1.75781e-05	1.17188e-05	9.27734e-06	1.5625e-05	4.39453e-06	1.95313e-05	1.02539e-05	3.61328e-05	1.5625e-05	5.85937e-05	3.66211e-05
2.44141e-06	1.66016e-05	1.36719e-05	8.78906e-06	7.51953e-05	5.85938e-06	1.46484e-05	8.78906e-06	-0.000172852	1.85547e-05	7.71484e-05	3.90625e-05
3.90625e-06	1.75781e-05	1.5625e-05	8.30078e-06	0.000125977	3.17383e-06	1.75781e-05	7.8125e-06	-0.000140625	1.66016e-05	7.51953e-05	4.15039e-05
9.76563e-07	1.5625e-05	1.85547e-05	7.32422e-06	0.000177734	4.88281e-06	1.26953e-05	8.30078e-06	-7.03125e-05	1.85547e-05	8.49609e-05	3.66211e-05
-6.83594e-06	1.66016e-05	1.75781e-05	8.78906e-06	0.000101562	2.68555e-06	1.85547e-05	8.30078e-06	4.58984e-05	1.85547e-05	8.98437e-05	3.41797e-05
-8.30078e-06	1.66016e-05	1.66016e-05	7.8125e-06	3.41797e-05	2.19727e-06	3.125e-05	1.12305e-05	0.000137695	1.75781e-05	9.375e-05	3.66211e-05
-9.76563e-07	1.5625e-05	1.75781e-05	8.30078e-06	7.71484e-05	2.68555e-06	3.125e-05	8.78906e-06	-0.000197266	1.95313e-05	7.42187e-05	3.41797e-05
9.27734e-06	1.75781e-05	1.66016e-05	8.78906e-06	4.88281e-06	9.76563e-07	3.22266e-05	7.8125e-06	-2.53906e-05	2.14844e-05	5.37109e-05	4.15039e-05
2.24609e-05	1.5625e-05	1.46484e-05	8.30078e-06	-0.000195313	1.2207e-06	3.51562e-05	4.88281e-06	-1.46484e-05	1.85547e-05	6.54297e-05	3.90625e-05
3.66211e-05	1.66016e-05	1.5625e-05	8.78906e-06	-6.05469e-05	3.41797e-06	2.92969e-05	7.8125e-06	3.02734e-05	1.66016e-05	8.00781e-05	4.15039e-05
2.29492e-05	1.85547e-05	1.5625e-05	7.32422e-06	8.88672e-05	2.44141e-06	2.53906e-05	5.37109e-06	4.39453e-05	1.75781e-05	7.51953e-05	3.90625e-05
2.44141e-06	1.5625e-05	1.46484e-05	6.83594e-06	4.49219e-05	4.88281e-06	6.83594e-06	4.39453e-06	-6.44531e-05	1.5625e-05	7.51953e-05	3.66211e-05
-1.46484e-06	1.75781e-05	1.66016e-05	8.30078e-06	-0.000119141	2.68555e-06	-4.88281e-06	6.34766e-06	-0.000183594	1.36719e-05	6.73828e-05	3.66211e-05
-9.76563e-07	1.75781e-05	1.5625e-05	8.30078e-06	-0.000209961	4.88281e-06	5.85938e-06	8.30078e-06	-0.000131836	1.66016e-05	6.54297e-05	3.90625e-05
4.88281e-07	1.66016e-05	1.75781e-05	8.78906e-06	-0.00012207	3.66211e-06	3.51562e-05	9.76563e-06	-4.49219e-05	1.17188e-05	5.95703e-05	3.66211e-05
2.92969e-06	1.5625e-05	1.66016e-05	9.76563e-06	7.61719e-05	6.5918e-06	9.66797e-05	7.8125e-06	0.000175781	1.36719e-05	5.76172e-05	3.90625e-05
2.92969e-06	1.75781e-05	1.66016e-05	7.8125e-06	6.73828e-05	5.61523e-06	0.000203125	5.37109e-06	0.000250977	1.66016e-05	4.88281e-05	3.66211e-05
5.85938e-06	1.5625e-05	1.75781e-05	8.78906e-06	3.51562e-05	5.37109e-06	0.000239258	5.37109e-06	0.000169922	1.85547e-05	4.78516e-05	3.90625e-05
5.85938e-06	1.66016e-05	1.85547e-05	6.83594e-06	-9.76563e-06	4.15039e-06	-4.00391e-05	9.76563e-07	0.000131836	1.36719e-05	3.71094e-05	3.66211e-05
7.8125e-06	1.66016e-05	1.85547e-05	8.30078e-06	0.000201172	4.88281e-06	-0.000347656	2.92969e-06	0.000182617	2.24609e-05	3.71094e-05	3.90625e-05
8.78906e-06	1.66016e-05	1.95313e-05	8.78906e-06	0.000461914	5.12695e-06	-0.000366211	3.90625e-06	8.10547e-05	1.95313e-05	2.24609e-05	3.90625e-05
1.07422e-05	1.75781e-05	2.05078e-05	8.30078e-06	0.00022168	5.37109e-06	-0.000164063	1.95313e-06	-8.39844e-05	2.05078e-05	1.75781e-05	3.90625e-05
9.27734e-06	1.75781e-05	1.36719e-05	9.27734e-06	-0.000118164	4.15039e-06	4.49219e-05	1.95313e-06	-0.000143555	1.85547e-05	2.24609e-05	3.90625e-05
8.78906e-06	1.66016e-05	1.66016e-05	7.32422e-06	-0.000229492	4.63867e-06	9.375e-05	3.90625e-06	-0.000236328	1.85547e-05	3.71094e-05	4.63867e-05
9.76563e-06	2.05078e-05	1.95313e-05	7.8125e-06	-0.000226563	2.68555e-06	0.00024707	9.27734e-06	-0.000114258	1.5625e-05	1.95313e-05	4.63867e-05
1.12305e-05	1.5625e-05	2.83203e-05	8.78906e-06	-0.000125977	3.17383e-06	0.000350586	8.30078e-06	-1.26953e-05	1.75781e-05	1.85547e-05	4.63867e-05
1.17188e-05	1.36719e-05	0	7.8125e-06	-4.98047e-05	3.90625e-06	0.00021582	1.17188e-05	-9.66797e-05	1.5625e-05	9.76563e-06	4.15039e-05
1.02539e-05	1.36719e-05	9.76563e-07	7.32422e-06	1.17188e-05	4.88281e-06	-2.63672e-05	9.76563e-06	-4.29687e-05	1.66016e-05	7.8125e-06	4.15039e-05
1.12305e-05	1.5625e-05	9.76563e-06	8.78906e-06	9.76563e-06	3.90625e-06	-0.000157227	9.27734e-06	8.98437e-05	1.36719e-05	-4.88281e-06	3.66211e-05
1.26953e-05	1.46484e-05	1.5625e-05	8.78906e-06	-3.71094e-05	5.37109e-06	-0.000118164	1.17188e-05	0.000172852	1.36719e-05	4.88281e-06	3.90625e-05
7.8125e-06	1.66016e-05	1.95313e-05	7.8125e-06	-3.80859e-05	5.12695e-06	-1.46484e-05	9.76563e-06	0.000113281	1.46484e-05	2.92969e-06	3.66211e-05
6.34766e-06	1.75781e-05	2.05078e-05	8.30078e-06	3.32031e-05	6.34766e-06	9.08203e-05	7.8125e-06	0.000116211	1.85547e-05	3.90625e-06	4.15039e-05
8.78906e-06	1.66016e-05	2.34375e-05	9.27734e-06	6.54297e-05	5.85938e-06	7.61719e-05	5.85938e-06	0.000128906	1.66016e-05	8.78906e-06	4.39453e-05
8.30078e-06	1.46484e-05	2.34375e-05	7.32422e-06	6.44531e-05	5.85938e-06	-4.10156e-05	4.88281e-06	-3.90625e-06	1.85547e-05	1.17188e-05	4.88281e-05
8.78906e-06	1.46484e-05	2.05078e-05	8.30078e-06	5.95703e-05	7.08008e-06	-5.46875e-05	7.32422e-06	-6.93359e-05	1.66016e-05	3.90625e-06	4.15039e-05
1.02539e-05	1.85547e-05	1.95313e-05	8.30078e-06	3.80859e-05	8.05664e-06	-7.22656e-05	1.12305e-05	-1.95313e-05	1.85547e-05	8.78906e-06	3.90625e-05
5.85938e-06	1.85547e-05	1.75781e-05	8.78906e-06	-8.78906e-06	3.90625e-06	-3.02734e-05	1.41602e-05	-1.36719e-05	1.85547e-05	-5.85938e-06	3.66211e-05
-5.37109e-06	1.5625e-05	1.75781e-05	9.76563e-06	-4.29687e-05	-2.92969e-06	-1.36719e-05	1.31836e-05	3.71094e-05	1.85547e-05	-1.95313e-05	4.63867e-05
-1.75781e-05	1.66016e-05	1.5625e-05	6.83594e-06	-5.37109e-05	-4.88281e-07	5.76172e-05	1.46484e-05	5.56641e-05	1.46484e-05	-2.34375e-05	4.63867e-05
-4.88281e-06	1.66016e-05	1.46484e-05	8.78906e-06	8.00781e-05	9.76563e-07	0.000111328	1.17188e-05	0.000109375	1.5625e-05	-7.8125e-06	4.39453e-05
4.49219e-05	1.66016e-05	1.46484e-05	7.8125e-06	1.46484e-05	1.2207e-06	0.000141602	1.12305e-05	0.000179687	1.46484e-05	1.95313e-06	3.90625e-05
4.6875e-05	1.46484e-05	1.36719e-05	6.83594e-06	-1.36719e-05	3.90625e-06	0.000125	8.78906e-06	0.000121094	1.66016e-05	2.24609e-05	4.88281e-05
1.95313e-05	1.5625e-05	1.66016e-05	9.27734e-06	-2.34375e-05	3.41797e-06	8.78906e-06	6.83594e-06	-4.88281e-06	1.36719e-05	2.53906e-05	4.63867e-05
2.44141e-06	1.66016e-05	1.46484e-05	9.27734e-06	-9.76563e-07	3.66211e-06	-6.25e-05	9.27734e-06	-1.85547e-05	1.36719e-05	2.34375e-05	4.15039e-05
-4.88281e-07	1.66016e-05	1.5625e-05	8.78906e-06	5.07812e-05	4.88281e-06	-8.00781e-05	1.2207e-05	-8.39844e-05	1.5625e-05	9.76563e-06	3.66211e-05
-2.44141e-06	1.66016e-05	1.75781e-05	7.8125e-06	8.10547e-05	4.63867e-06	-6.73828e-05	8.78906e-06	-0.00021875	1.85547e-05	1.07422e-05	4.39453e-05
-6.83594e-06	1.85547e-05	1.75781e-05	8.78906e-06	9.17969e-05	5.37109e-06	-4.49219e-05	6.83594e-06	-0.00019043	1.66016e-05	8.78906e-06	4.63867e-05
-4.88281e-06	1.66016e-05	1.66016e-05	9.76563e-06	0.000114258	7.56836e-06	-3.90625e-06	6.34766e-06	-9.76563e-05	1.85547e-05	2.92969e-06	4.63867e-05
9.76563e-07	1.75781e-05	1.46484e-05	8.30078e-06	0.00012207	5.37109e-06	5.46875e-05	8.78906e-06	8.30078e-05	1.85547e-05	-3.125e-05	4.15039e-05
1.36719e-05	1.66016e-05	1.26953e-05	2.63672e-05	0.000119141	4.15039e-06	0.000107422	1.26953e-05	0.000131836	2.14844e-05	-2.73438e-05	4.39453e-05
2.29492e-05	1.75781e-05	1.26953e-05	2.00195e-05	5.95703e-05	3.41797e-06	9.86328e-05	1.26953e-05	0.000105469	1.66016e-05	8.69141e-05	3.90625e-05
4.39453e-05	1.66016e-05	1.17188e-05	2.92969e-06	-0.00015625	3.90625e-06	7.32422e-05	1.36719e-05	0.000125	1.66016e-05	9.375e-05	3.90625e-05
2.88086e-05	1.17188e-05	3.90625e-06	3.90625e-06	1.66016e-05	1.95313e-06	0.000101562	1.41602e-05	0.000125	1.46484e-05	-5.85937e-05	3.66211e-05
-1.02539e-05	1.46484e-05	4.88281e-06	3.90625e-06	0.000294922	0	0.000115234	1.41602e-05	1.85547e-05	1.66016e-05	-0.000109375	4.15039e-05
-1.5625e-05	1.46484e-05	1.36719e-05	4.88281e-07	0.000147461	-1.46484e-06	3.32031e-05	1.17188e-05	8.30078e-05	1.36719e-05	2.53906e-05	3.90625e-05
-4.88281e-06	1.5625e-05	1.66016e-05	1.95313e-06	-9.96094e-05	4.88281e-07	-8.30078e-05	7.32422e-06	4.58984e-05	1.75781e-05	3.61328e-05	4.15039e-05
6.83594e-06	1.5625e-05	1.95313e-05	2.92969e-06	-8.00781e-05	4.39453e-06	-0.000245117	4.88281e-06	-0.000106445	1.66016e-05	5.95703e-05	4.15039e-05
1.26953e-05	1.75781e-05	2.63672e-05	6.34766e-06	8.78906e-06	5.37109e-06	-0.00030957	7.32422e-06	-0.000175781	1.66016e-05	6.05469e-05	4.39453e-05
1.51367e-05	1.85547e-05	3.125e-05	9.27734e-06	2.53906e-05	3.90625e-06	-7.61719e-05	6.83594e-06	-0.000100586	1.75781e-05	0.000208984	3.90625e-05
1.41602e-05	1.66016e-05	3.02734e-05	8.30078e-06	-1.5625e-05	3.66211e-06	0.000129883	3.90625e-06	4.6875e-05	1.66016e-05	0.000249023	4.39453e-05
1.31836e-05	1.46484e-05	2.83203e-05	7.8125e-06	-1.36719e-05	4.15039e-06	0.000110352	6.34766e-06	0.000138672	1.75781e-05	3.32031e-05	4.15039e-05
1.02539e-05	1.75781e-05	2.44141e-05	1.26953e-05	-1.07422e-05	2.68555e-06	0.000123047	8.78906e-06	0.000148437	1.75781e-05	-0.000226563	3.90625e-05
9.27734e-06	1.66016e-05	2.63672e-05	1.12305e-05	3.90625e-06	4.88281e-07	0.000108398	9.27734e-06	-5.85938e-06	1.5625e-05	-0.000223633	3.90625e-05
7.32422e-06	1.5625e-05	2.92969e-05	6.83594e-06	2.44141e-05	1.2207e-06	0.000101562	9.76563e-06	-1.5625e-05	1.66016e-05	-0.000116211	4.15039e-05
8.30078e-06	1.75781e-05	9.76563e-06	8.30078e-06	0.000126953	7.56836e-06	5.46875e-05	9.27734e-06	9.96094e-05	1.36719e-05	5.85938e-06	3.41797e-05
1.02539e-05	1.5625e-05	9.66797e-05	8.30078e-06	0.000237305	7.8125e-06	9.76563e-06	9.27734e-06	0.00019043	1.75781e-05	-3.02734e-05	3.90625e-05
8.78906e-06	1.46484e-05	9.76563e-06	5.85938e-06	0.000212891	4.88281e-06	-1.66016e-05	8.78906e-06	0.00031543	1.66016e-05	-2.63672e-05	3.41797e-05
8.30078e-06	1.07422e-05	-0.000151367	4.88281e-06	-3.71094e-05	-1.2207e-06	-4.88281e-05	8.78906e-06	0.000178711	1.75781e-05	0.000164063	3.90625e-05
7.32422e-06	1.66016e-05	-0.000130859	4.88281e-06	-0.000172852	-2.44141e-06	-4.88281e-05	7.8125e-06	-3.80859e-05	1.66016e-05	0.000330078	3.90625e-05
5.85938e-06	1.66016e-05	-2.24609e-05	2.92969e-06	-0.000120117	4.88281e-07	-1.26953e-05	6.83594e-06	-0.000116211	1.66016e-05	0.000136719	4.63867e-05
4.88281e-06	1.85547e-05	0.000128906	5.85938e-06	-4.29687e-05	9.76563e-07	1.17188e-05	4.88281e-06	-9.96094e-05	1.5625e-05	1.07422e-05	4.63867e-05
1.02539e-05	1.66016e-05	0.000264648	8.30078e-06	2.92969e-05	1.46484e-06	5.85938e-06	5.37109e-06	-0.000125	1.95313e-05	-6.64063e-05	4.88281e-05
8.78906e-06	1.5625e-05	0.000166992	5.37109e-06	5.46875e-05	2.92969e-06	-9.76563e-07	4.88281e-06	-8.10547e-05	1.85547e-05	-0.000208984	4.88281e-05
9.27734e-06	1.66016e-05	2.92969e-05	4.88281e-06	1.17188e-05	3.41797e-06	-5.85938e-06	5.37109e-06	-4.29687e-05	1.95313e-05	-0.000169922	5.12695e-05
7.8125e-06	1.75781e-05	-6.93359e-05	9.76563e-06	-1.66016e-05	4.88281e-06	9.76563e-07	5.85938e-06	2.92969e-06	1.5625e-05	9.76563e-07	4.39453e-05
6.83594e-06	1.66016e-05	-5.07812e-05	1.07422e-05	-1.75781e-05	5.85938e-06	1.17188e-05	5.37109e-06	-9.76563e-07	1.5625e-05	0.000112305	4.39453e-05
2.44141e-06	1.66016e-05	2.92969e-06	1.02539e-05	-3.71094e-05	3.66211e-06	1.66016e-05	3.90625e-06	0.000121094	1.46484e-05	6.54297e-05	3.41797e-05
9.76563e-07	1.46484e-05	4.88281e-06	1.17188e-05	-4.10156e-05	4.39453e-06	1.66016e-05	5.85938e-06	0.000148437	1.75781e-05	-6.83594e-06	3.90625e-05
-4.88281e-07	1.17188e-05	-9.76563e-06	9.76563e-06	-2.83203e-05	5.37109e-06	1.46484e-05	5.37109e-06	6.83594e-05	1.66016e-05	1.85547e-05	3.66211e-05
-8.30078e-06	6.83594e-06	-5.85938e-06	9.76563e-06	-2.24609e-05	4.88281e-06	1.85547e-05	6.83594e-06	-4.88281e-06	1.75781e-05	6.25e-05	3.90625e-05
-1.12305e-05	1.07422e-05	1.95313e-06	9.27734e-06	-1.85547e-05	3.66211e-06	3.71094e-05	9.76563e-06	-6.64063e-05	1.46484e-05	0.000270508	3.66211e-05
-3.90625e-06	1.75781e-05	1.36719e-05	3.41797e-06	-1.36719e-05	3.66211e-06	5.46875e-05	1.02539e-05	-4.19922e-05	1.66016e-05	9.76563e-05	4.39453e-05
1.12305e-05	1.85547e-05	1.66016e-05	7.8125e-06	-5.85938e-06	-1.2207e-06	5.46875e-05	8.30078e-06	2.44141e-05	1.46484e-05	-6.44531e-05	3.90625e-05
3.51562e-05	1.95313e-05	1.95313e-05	9.76563e-06	3.90625e-06	2.44141e-06	4.6875e-05	9.27734e-06	2.92969e-05	1.66016e-05	-0.000146484	3.66211e-05
5.32227e-05	1.95313e-05	3.02734e-05	4.88281e-06	2.92969e-06	1.46484e-06	2.14844e-05	8.30078e-06	2.63672e-05	1.5625e-05	-0.000202148	3.41797e-05
3.66211e-05	1.5625e-05	4.39453e-05	7.8125e-06	5.85938e-06	2.44141e-06	0	7.8125e-06	2.92969e-05	1.85547e-05	-3.51562e-05	4.15039e-05
3.90625e-06	1.46484e-05	4.10156e-05	1.61133e-05	2.24609e-05	2.44141e-06	-3.90625e-06	8.30078e-06	3.22266e-05	1.66016e-05	-3.90625e-06	4.39453e-05
-1.41602e-05	1.66016e-05	3.02734e-05	1.61133e-05	2.14844e-05	9.76563e-07	1.17188e-05	8.78906e-06	2.53906e-05	1.75781e-05	-4.19922e-05	4.63867e-05
-1.02539e-05	1.66016e-05	7.8125e-06	4.39453e-06	1.85547e-05	2.92969e-06	5.46875e-05	1.02539e-05	1.07422e-05	1.5625e-05	-0.000114258	4.39453e-05
4.39453e-06	1.95313e-05	-5.85938e-06	9.76563e-07	4.29687e-05	2.92969e-06	8.39844e-05	9.27734e-06	-5.85938e-06	1.75781e-05	0.000217773	4.88281e-05
1.26953e-05	1.95313e-05	4.88281e-06	1.46484e-06	4.88281e-05	7.32422e-07	4.98047e-05	7.8125e-06	-3.125e-05	1.66016e-05	0.000280273	4.88281e-05
7.8125e-06	2.05078e-05	-3.90625e-06	1.66016e-05	2.14844e-05	2.92969e-06	1.17188e-05	8.78906e-06	-4.10156e-05	1.95313e-05	1.85547e-05	4.88281e-05
3.41797e-06	1.85547e-05	2.92969e-06	1.66016e-05	-4.78516e-05	1.95313e-06	-9.76563e-07	6.34766e-06	1.17188e-05	1.85547e-05	-0.000248047	4.63867e-05
2.44141e-06	1.66016e-05	1.46484e-05	8.30078e-06	-6.93359e-05	0	9.57031e-05	5.37109e-06	3.90625e-06	1.85547e-05	-0.000292969	5.12695e-05
2.44141e-06	1.26953e-05	1.46484e-05	1.31836e-05	-3.22266e-05	2.44141e-07	0.000166992	3.90625e-06	-2.63672e-05	1.85547e-05	-0.000193359	4.63867e-05
2.44141e-06	1.07422e-05	2.14844e-05	1.02539e-05	3.90625e-06	3.17383e-06	4.10156e-05	5.85938e-06	-6.54297e-05	1.95313e-05	-7.61719e-05	5.37109e-05
8.78906e-06	1.5625e-05	1.46484e-05	1.26953e-05	-2.92969e-06	4.15039e-06	-4.19922e-05	9.27734e-06	-9.96094e-05	1.66016e-05	-9.76563e-06	4.88281e-05
1.12305e-05	1.5625e-05	3.90625e-06	1.75781e-05	-3.51562e-05	5.85938e-06	-7.71484e-05	9.76563e-06	-9.66797e-05	1.5625e-05	3.32031e-05	3.41797e-05
1.07422e-05	1.75781e-05	-5.85938e-06	1.07422e-05	-1.5625e-05	3.66211e-06	-8.00781e-05	7.8125e-06	-7.22656e-05	1.5625e-05	-7.8125e-06	1.95313e-05
1.2207e-05	2.05078e-05	-1.95313e-05	9.76563e-06	4.49219e-05	4.63867e-06	-5.76172e-05	8.30078e-06	-4.39453e-05	1.75781e-05	0.000371094	2.44141e-05
1.31836e-05	1.85547e-05	1.07422e-05	1.85547e-05	8.59375e-05	3.41797e-06	-5.95703e-05	1.07422e-05	-5.85938e-06	1.75781e-05	0.000544922	3.41797e-05
1.31836e-05	1.5625e-05	0	2.24609e-05	7.51953e-05	3.41797e-06	-3.02734e-05	1.17188e-05	2.44141e-05	1.75781e-05	0.000504883	3.66211e-05
1.12305e-05	1.5625e-05	3.90625e-06	9.27734e-06	5.85937e-05	4.15039e-06	-5.85938e-06	9.76563e-06	4.00391e-05	1.46484e-05	0.000279297	3.66211e-05
8.78906e-06	2.05078e-05	7.8125e-06	2.92969e-06	7.22656e-05	6.10352e-06	2.34375e-05	8.30078e-06	6.34766e-05	1.66016e-05	-0.000251953	4.39453e-05
8.30078e-06	1.5625e-05	1.26953e-05	3.41797e-06	0.000101562	2.68555e-06	6.54297e-05	6.83594e-06	6.54297e-05	1.66016e-05	-0.000425781	4.39453e-05
7.32422e-06	1.5625e-05	1.5625e-05	5.85938e-06	8.30078e-05	3.17383e-06	8.69141e-05	7.8125e-06	5.27344e-05	1.85547e-05	-0.000317383	4.39453e-05
6.34766e-06	1.36719e-05	1.36719e-05	8.30078e-06	1.46484e-05	2.44141e-06	8.20313e-05	6.34766e-06	4.6875e-05	1.66016e-05	-0.000232422	4.39453e-05
9.27734e-06	1.66016e-05	1.17188e-05	9.27734e-06	-8.69141e-05	4.88281e-06	6.54297e-05	8.78906e-06	4.00391e-05	1.85547e-05	-0.000126953	4.39453e-05
1.31836e-05	1.85547e-05	1.46484e-05	9.76563e-06	-1.46484e-05	4.88281e-06	3.71094e-05	6.34766e-06	3.41797e-05	1.46484e-05	-9.76563e-06	3.41797e-05
1.17188e-05	1.5625e-05	1.26953e-05	9.27734e-06	0.000101562	2.92969e-06	9.76563e-06	4.88281e-06	3.02734e-05	1.75781e-05	4.98047e-05	3.90625e-05
7.8125e-06	1.46484e-05	1.17188e-05	8.30078e-06	6.64063e-05	3.41797e-06	-1.26953e-05	5.37109e-06	2.83203e-05	1.66016e-05	1.07422e-05	4.15039e-05
4.88281e-06	1.66016e-05	1.07422e-05	6.83594e-06	-1.75781e-05	4.15039e-06	-3.71094e-05	6.83594e-06	1.95313e-05	1.75781e-05	4.88281e-06	5.37109e-05
4.88281e-06	1.75781e-05	1.46484e-05	8.30078e-06	-3.71094e-05	7.08008e-06	-4.00391e-05	7.8125e-06	2.73438e-05	1.66016e-05	4.98047e-05	5.12695e-05
4.88281e-06	1.75781e-05	1.75781e-05	8.78906e-06	-1.07422e-05	8.05664e-06	-1.5625e-05	1.41602e-05	6.05469e-05	1.85547e-05	9.17969e-05	4.39453e-05
5.37109e-06	1.75781e-05	1.85547e-05	1.12305e-05	2.44141e-05	2.92969e-06	2.53906e-05	1.66016e-05	3.02734e-05	1.46484e-05	8.00781e-05	3.90625e-05
6.34766e-06	1.66016e-05	1.75781e-05	9.27734e-06	6.54297e-05	2.92969e-06	3.61328e-05	1.61133e-05	1.5625e-05	1.75781e-05	3.61328e-05	3.90625e-05
4.88281e-06	1.66016e-05	1.75781e-05	7.32422e-06	0.000160156	1.2207e-06	2.14844e-05	1.2207e-05	1.5625e-05	1.85547e-05	1.66016e-05	3.66211e-05
6.34766e-06	1.75781e-05	2.44141e-05	5.37109e-06	0.000117187	2.19727e-06	2.92969e-06	7.8125e-06	2.63672e-05	1.66016e-05	5.85937e-05	3.66211e-05
7.32422e-06	1.85547e-05	1.85547e-05	7.32422e-06	-1.75781e-05	-1.46484e-06	-1.36719e-05	3.41797e-06	2.92969e-05	1.5625e-05	6.64063e-05	3.41797e-05
8.30078e-06	1.46484e-05	8.78906e-06	6.34766e-06	-8.30078e-05	5.37109e-06	-1.95313e-05	4.88281e-06	3.125e-05	1.85547e-05	6.93359e-05	3.66211e-05
6.34766e-06	1.66016e-05	1.75781e-05	6.34766e-06	-4.19922e-05	7.56836e-06	1.95313e-06	4.88281e-06	2.83203e-05	1.66016e-05	5.17578e-05	3.41797e-05
5.37109e-06	1.75781e-05	2.24609e-05	6.83594e-06	-9.76563e-07	7.56836e-06	2.14844e-05	1.02539e-05	2.92969e-05	1.95313e-05	3.80859e-05	3.66211e-05
4.39453e-06	1.5625e-05	2.34375e-05	6.83594e-06	1.46484e-05	6.5918e-06	-9.76563e-06	9.27734e-06	3.125e-05	1.66016e-05	1.95313e-05	3.90625e-05
6.34766e-06	1.26953e-05	2.53906e-05	6.34766e-06	1.36719e-05	7.08008e-06	-5.85937e-05	8.30078e-06	3.125e-05	1.66016e-05	1.5625e-05	4.63867e-05
7.32422e-06	1.5625e-05	2.53906e-05	6.34766e-06	1.07422e-05	8.30078e-06	-5.27344e-05	6.34766e-06	3.22266e-05	1.5625e-05	7.8125e-06	4.39453e-05
7.8125e-06	1.36719e-05	2.34375e-05	6.34766e-06	1.5625e-05	6.5918e-06	3.125e-05	8.78906e-06	3.22266e-05	1.66016e-05	1.85547e-05	4.15039e-05
7.8125e-06	1.36719e-05	2.53906e-05	5.85938e-06	2.92969e-05	5.37109e-06	9.66797e-05	6.34766e-06	3.22266e-05	1.36719e-05	3.02734e-05	3.90625e-05
7.8125e-06	1.46484e-05	2.34375e-05	6.34766e-06	5.76172e-05	2.44141e-06	8.49609e-05	3.41797e-06	2.83203e-05	1.5625e-05	2.92969e-06	3.90625e-05
8.30078e-06	1.66016e-05	2.34375e-05	6.83594e-06	6.15234e-05	3.41797e-06	4.19922e-05	4.88281e-06	1.95313e-05	2.05078e-05	9.76563e-06	3.66211e-05
6.34766e-06	1.95313e-05	2.24609e-05	5.85938e-06	5.27344e-05	8.54492e-06	0	1.02539e-05	2.24609e-05	1.75781e-05	2.05078e-05	4.63867e-05
6.83594e-06	1.95313e-05	2.05078e-05	6.34766e-06	2.92969e-05	6.5918e-06	3.90625e-06	1.5625e-05	2.14844e-05	1.5625e-05	-2.05078e-05	4.88281e-05
7.8125e-06	1.75781e-05	2.24609e-05	5.85938e-06	-1.5625e-05	1.95313e-06	4.00391e-05	1.46484e-05	2.34375e-05	1.75781e-05	-5.85938e-06	4.63867e-05
7.8125e-06	1.66016e-05	2.53906e-05	6.34766e-06	8.30078e-05	1.2207e-06	6.44531e-05	1.07422e-05	1.95313e-05	1.5625e-05	1.95313e-06	3.90625e-05
1.02539e-05	1.95313e-05	2.53906e-05	3.90625e-06	0.000228516	-2.19727e-06	5.95703e-05	1.02539e-05	1.85547e-05	1.66016e-05	2.14844e-05	4.15039e-05
8.30078e-06	1.66016e-05	8.78906e-06	4.88281e-06	4.29687e-05	-5.61523e-06	2.73438e-05	7.8125e-06	1.5625e-05	1.85547e-05	4.00391e-05	3.90625e-05
7.8125e-06	1.66016e-05	1.07422e-05	6.34766e-06	-0.000185547	-6.83594e-06	-9.76563e-07	6.34766e-06	1.36719e-05	1.75781e-05	4.6875e-05	3.66211e-05
8.30078e-06	1.66016e-05	1.66016e-05	6.83594e-06	-0.000137695	-3.17383e-06	3.32031e-05	7.8125e-06	1.46484e-05	1.95313e-05	4.39453e-05	3.17383e-05
7.32422e-06	1.66016e-05	1.95313e-05	5.37109e-06	-0.000167969	1.46484e-06	4.98047e-05	8.78906e-06	2.14844e-05	1.75781e-05	5.76172e-05	3.66211e-05
7.8125e-06	1.85547e-05	2.05078e-05	6.83594e-06	-6.54297e-05	1.2207e-06	1.95313e-05	1.02539e-05	3.02734e-05	1.66016e-05	5.66406e-05	3.66211e-05
8.78906e-06	1.85547e-05	1.95313e-05	5.37109e-06	5.76172e-05	4.39453e-06	1.46484e-05	1.07422e-05	7.51953e-05	1.5625e-05	4.98047e-05	4.15039e-05
8.78906e-06	1.75781e-05	1.95313e-05	6.34766e-06	8.20313e-05	6.83594e-06	2.05078e-05	8.30078e-06	6.44531e-05	1.66016e-05	3.22266e-05	4.39453e-05
7.8125e-06	1.85547e-05	1.85547e-05	7.32422e-06	4.49219e-05	8.54492e-06	7.8125e-06	5.85938e-06	-9.66797e-05	1.85547e-05	3.22266e-05	4.15039e-05
9.76563e-06	1.66016e-05	1.95313e-05	9.27734e-06	-2.53906e-05	1.12305e-05	4.88281e-06	3.41797e-06	-0.000251953	1.46484e-05	0.000113281	3.90625e-05
8.78906e-06	1.75781e-05	2.14844e-05	9.76563e-06	7.32422e-05	1.17188e-05	4.78516e-05	3.90625e-06	-0.000272461	1.66016e-05	0.000162109	3.90625e-05
4.88281e-06	1.75781e-05	2.24609e-05	7.8125e-06	0.000210937	1.00098e-05	0.000162109	2.44141e-06	-0.000108398	1.5625e-05	7.61719e-05	3.66211e-05
-3.90625e-06	1.66016e-05	2.44141e-05	7.32422e-06	0.000130859	1.00098e-05	0.000108398	6.34766e-06	0.000251953	1.85547e-05	4.58984e-05	3.90625e-05
-8.78906e-06	1.85547e-05	2.05078e-05	7.8125e-06	-2.63672e-05	5.37109e-06	-8.10547e-05	9.27734e-06	0.000160156	1.85547e-05	4.29687e-05	4.15039e-05
-1.46484e-06	1.5625e-05	1.5625e-05	7.8125e-06	-8.88672e-05	5.61523e-06	-0.000142578	1.12305e-05	-4.19922e-05	1.66016e-05	4.58984e-05	4.88281e-05
1.5625e-05	1.46484e-05	1.46484e-05	8.78906e-06	-2.34375e-05	2.92969e-06	-7.71484e-05	1.17188e-05	-8.88672e-05	1.36719e-05	-1.07422e-05	4.39453e-05
3.02734e-05	1.5625e-05	1.36719e-05	8.78906e-06	-1.95313e-05	2.44141e-07	5.85938e-06	1.31836e-05	0.000101562	1.75781e-05	-6.34766e-05	4.15039e-05
4.05273e-05	1.5625e-05	1.26953e-05	7.8125e-06	-9.27734e-05	-2.44141e-07	1.75781e-05	1.07422e-05	0.000376953	1.66016e-05	9.66797e-05	3.66211e-05
2.68555e-05	1.5625e-05	1.5625e-05	9.27734e-06	-9.76563e-05	-7.32422e-07	-6.64063e-05	7.32422e-06	0.000445313	1.5625e-05	8.00781e-05	3.66211e-05
5.37109e-06	1.75781e-05	1.5625e-05	9.27734e-06	-4.19922e-05	7.32422e-07	-0.000100586	1.02539e-05	0.000331055	1.75781e-05	-3.22266e-05	3.90625e-05
-5.85938e-06	1.66016e-05	1.85547e-05	1.02539e-05	0.000199219	7.32422e-07	3.61328e-05	1.07422e-05	0.000241211	1.66016e-05	-7.32422e-05	3.90625e-05
-1.12305e-05	1.75781e-05	1.75781e-05	7.32422e-06	0.000171875	1.2207e-06	0.000129883	9.27734e-06	-5.27344e-05	1.5625e-05	8.78906e-06	4.88281e-05
-1.36719e-05	1.46484e-05	1.66016e-05	6.83594e-06	-3.51562e-05	1.70898e-06	0.000158203	9.27734e-06	-0.000361328	1.66016e-05	0.000286133	3.90625e-05
-7.8125e-06	1.66016e-05	1.85547e-05	8.78906e-06	-0.000119141	4.39453e-06	0.000110352	9.27734e-06	-0.000552734	1.36719e-05	0.000424805	3.17383e-05
6.83594e-06	1.5625e-05	1.75781e-05	8.78906e-06	-9.17969e-05	5.61523e-06	5.66406e-05	9.76563e-06	-0.000530273	1.85547e-05	0.000330078	3.66211e-05
1.85547e-05	7.8125e-06	1.66016e-05	8.78906e-06	-3.61328e-05	5.85938e-06	3.51562e-05	6.83594e-06	-0.000219727	1.5625e-05	3.41797e-05	3.90625e-05
2.68555e-05	1.07422e-05	1.66016e-05	9.76563e-06	8.78906e-06	6.34766e-06	3.71094e-05	6.83594e-06	-0.000191406	1.66016e-05	-0.000120117	3.90625e-05
2.34375e-05	1.85547e-05	1.85547e-05	9.76563e-06	1.5625e-05	6.10352e-06	-3.51562e-05	5.37109e-06	6.83594e-06	1.5625e-05	-0.00025	3.90625e-05
1.61133e-05	1.85547e-05	1.5625e-05	9.76563e-06	2.44141e-05	8.05664e-06	2.73438e-05	6.34766e-06	5.66406e-05	1.85547e-05	-0.000296875	5.37109e-05
9.76563e-07	1.75781e-05	1.5625e-05	9.27734e-06	3.80859e-05	8.05664e-06	-6.44531e-05	6.34766e-06	2.53906e-05	1.75781e-05	-0.00025	4.88281e-05
-3.41797e-06	1.75781e-05	1.36719e-05	9.27734e-06	5.37109e-05	6.5918e-06	-9.66797e-05	5.85938e-06	0.000161133	1.66016e-05	-0.000109375	4.63867e-05
2.44141e-06	1.66016e-05	1.36719e-05	7.8125e-06	6.83594e-05	6.34766e-06	-6.83594e-05	9.27734e-06	0.000536133	1.36719e-05	-0.000151367	4.63867e-05
3.90625e-06	1.75781e-05	1.07422e-05	9.27734e-06	4.98047e-05	6.34766e-06	-5.76172e-05	7.8125e-06	0.000624023	2.05078e-05	-0.000133789	5.61523e-05
6.34766e-06	1.66016e-05	1.66016e-05	9.76563e-06	3.90625e-05	7.32422e-06	-5.27344e-05	8.78906e-06	0.000386719	2.05078e-05	-9.375e-05	4.39453e-05
7.8125e-06	1.36719e-05	1.95313e-05	8.78906e-06	3.71094e-05	5.85938e-06	1.26953e-05	1.12305e-05	0.000266602	1.85547e-05	-7.32422e-05	4.63867e-05
5.85938e-06	1.17188e-05	1.85547e-05	9.27734e-06	2.53906e-05	2.19727e-06	4.39453e-05	1.02539e-05	-6.83594e-05	1.5625e-05	2.92969e-06	4.63867e-05
8.78906e-06	1.26953e-05	2.14844e-05	8.78906e-06	2.73438e-05	-2.92969e-06	3.22266e-05	1.07422e-05	-0.000270508	1.66016e-05	0.000145508	5.37109e-05
6.34766e-06	1.46484e-05	1.75781e-05	9.27734e-06	-8.78906e-06	-3.66211e-06	6.44531e-05	1.02539e-05	-0.000226563	2.05078e-05	0.000143555	4.15039e-05
-1.95313e-06	1.66016e-05	1.66016e-05	8.30078e-06	-7.12891e-05	-4.88281e-07	4.78516e-05	6.83594e-06	-0.000177734	2.14844e-05	8.00781e-05	3.66211e-05
-9.27734e-06	1.75781e-05	1.5625e-05	8.78906e-06	-0.000118164	2.92969e-06	4.29687e-05	7.8125e-06	-0.000311523	2.05078e-05	3.80859e-05	3.41797e-05
-4.88281e-07	1.66016e-05	1.5625e-05	1.02539e-05	-5.46875e-05	3.66211e-06	3.90625e-05	7.32422e-06	-0.000245117	2.34375e-05	8.39844e-05	4.15039e-05
4.98047e-05	1.66016e-05	1.66016e-05	8.30078e-06	-1.95313e-06	9.76563e-07	3.61328e-05	7.32422e-06	8.39844e-05	1.85547e-05	5.66406e-05	4.15039e-05
5.95703e-05	1.46484e-05	1.46484e-05	8.30078e-06	4.88281e-05	1.46484e-06	3.61328e-05	4.39453e-06	0.000269531	1.66016e-05	4.19922e-05	4.39453e-05
3.80859e-05	1.66016e-05	1.5625e-05	8.30078e-06	8.39844e-05	2.44141e-06	2.53906e-05	6.83594e-06	0.000162109	1.07422e-05	-1.46484e-05	4.15039e-05
1.07422e-05	1.5625e-05	1.5625e-05	7.32422e-06	9.66797e-05	3.90625e-06	2.92969e-06	8.78906e-06	2.92969e-06	1.26953e-05	-8.98437e-05	4.39453e-05
-2.44141e-06	1.66016e-05	1.46484e-05	1.02539e-05	8.59375e-05	2.19727e-06	0	7.32422e-06	-8.39844e-05	1.36719e-05	-8.88672e-05	4.15039e-05
-5.37109e-06	1.5625e-05	1.5625e-05	8.30078e-06	7.03125e-05	3.90625e-06	1.26953e-05	1.02539e-05	-0.000272461	1.5625e-05	-7.71484e-05	4.15039e-05
-6.83594e-06	1.5625e-05	1.5625e-05	8.78906e-06	6.05469e-05	6.10352e-06	1.5625e-05	1.07422e-05	-0.000393555	1.5625e-05	-6.64063e-05	4.15039e-05
-3.90625e-06	1.5625e-05	1.5625e-05	9.27734e-06	5.85937e-05	6.5918e-06	2.83203e-05	1.02539e-05	4.00391e-05	1.85547e-05	-2.05078e-05	4.88281e-05
-9.76563e-07	1.5625e-05	1.66016e-05	8.78906e-06	3.90625e-05	4.88281e-06	3.32031e-05	8.30078e-06	0.000286133	1.66016e-05	-1.75781e-05	4.39453e-05
1.46484e-06	1.66016e-05	1.95313e-05	8.30078e-06	2.83203e-05	4.39453e-06	3.02734e-05	7.8125e-06	0.000211914	2.05078e-05	-1.75781e-05	4.39453e-05
6.34766e-06	1.75781e-05	2.14844e-05	8.78906e-06	2.05078e-05	1.46484e-06	1.17188e-05	7.32422e-06	0.000145508	1.85547e-05	-8.78906e-06	4.39453e-05
1.02539e-05	1.75781e-05	2.14844e-05	9.27734e-06	-4.10156e-05	-9.76563e-07	3.32031e-05	6.34766e-06	0.000262695	2.05078e-05	-3.90625e-06	4.39453e-05
1.2207e-05	1.66016e-05	9.76563e-06	1.17188e-05	-4.88281e-05	-2.19727e-06	6.25e-05	4.88281e-06	0.000362305	2.14844e-05	-9.76563e-07	4.39453e-05
1.17188e-05	1.46484e-05	3.90625e-06	8.30078e-06	7.51953e-05	2.19727e-06	3.90625e-05	7.32422e-06	0.000246094	2.24609e-05	-5.85938e-06	4.15039e-05
1.07422e-05	1.46484e-05	7.8125e-06	9.27734e-06	0.000222656	-1.2207e-06	-5.85938e-06	7.32422e-06	-2.92969e-05	1.85547e-05	-2.92969e-06	3.41797e-05
1.2207e-05	1.5625e-05	1.17188e-05	7.32422e-06	0.000137695	2.44141e-07	-3.41797e-05	7.8125e-06	-0.000451172	1.46484e-05	4.29687e-05	3.41797e-05
1.07422e-05	1.75781e-05	1.5625e-05	8.30078e-06	-4.58984e-05	9.76563e-07	-3.90625e-06	7.8125e-06	-0.000476562	1.17188e-05	7.91016e-05	4.15039e-05
1.12305e-05	1.66016e-05	1.85547e-05	8.30078e-06	-7.91016e-05	9.76563e-07	7.32422e-05	9.27734e-06	-0.000164063	1.36719e-05	7.71484e-05	4.15039e-05
1.2207e-05	1.66016e-05	1.75781e-05	8.78906e-06	-4.78516e-05	4.88281e-07	0.000195313	7.32422e-06	0.000160156	1.75781e-05	7.22656e-05	3.66211e-05
1.17188e-05	1.66016e-05	1.5625e-05	7.8125e-06	-3.125e-05	1.95313e-06	0.00019043	8.30078e-06	0.00031543	1.85547e-05	0.000115234	4.39453e-05
9.76563e-06	1.75781e-05	1.36719e-05	8.78906e-06	-1.07422e-05	3.17383e-06	4.49219e-05	9.76563e-06	0.000175781	1.66016e-05	0.000260742	4.15039e-05
8.30078e-06	1.5625e-05	1.85547e-05	7.8125e-06	7.03125e-05	4.15039e-06	-5.66406e-05	1.02539e-05	9.66797e-05	1.46484e-05	0.000264648	3.66211e-05
8.30078e-06	1.5625e-05	2.05078e-05	8.30078e-06	8.00781e-05	5.12695e-06	-8.88672e-05	1.07422e-05	5.66406e-05	1.26953e-05	-4.00391e-05	3.17383e-05
6.83594e-06	1.5625e-05	2.14844e-05	7.8125e-06	0.000168945	3.17383e-06	-9.57031e-05	8.78906e-06	0.000142578	1.26953e-05	-4.88281e-06	3.41797e-05
4.88281e-06	1.66016e-05	1.95313e-05	8.30078e-06	0.00012207	4.39453e-06	-1.17188e-05	7.32422e-06	0.000175781	1.17188e-05	0.000271484	3.41797e-05
4.88281e-06	1.5625e-05	1.66016e-05	9.27734e-06	-7.8125e-05	2.68555e-06	5.07812e-05	1.46484e-06	0.000107422	1.5625e-05	0.000137695	3.41797e-05
4.88281e-06	1.75781e-05	1.46484e-05	7.32422e-06	-9.57031e-05	2.68555e-06	2.92969e-05	1.95313e-06	-4.6875e-05	1.66016e-05	3.90625e-05	3.41797e-05
3.41797e-06	1.66016e-05	1.36719e-05	8.78906e-06	0.000105469	3.17383e-06	-2.24609e-05	4.39453e-06	-0.000130859	1.75781e-05	6.73828e-05	3.66211e-05
5.37109e-06	1.5625e-05	1.46484e-05	9.76563e-06	8.30078e-05	5.85938e-06	-9.08203e-05	7.32422e-06	-7.32422e-05	1.26953e-05	0.000342773	3.17383e-05
5.37109e-06	1.5625e-05	1.5625e-05	8.30078e-06	-5.66406e-05	4.63867e-06	-6.15234e-05	7.32422e-06	0.000104492	1.5625e-05	0.000228516	3.66211e-05
4.88281e-06	1.75781e-05	1.46484e-05	9.76563e-06	-0.000115234	2.19727e-06	2.53906e-05	7.8125e-06	5.17578e-05	1.26953e-05	-0.000135742	3.90625e-05
4.39453e-06	1.66016e-05	1.46484e-05	8.30078e-06	-5.95703e-05	4.15039e-06	6.83594e-06	8.78906e-06	5.85937e-05	1.66016e-05	-0.000373047	5.12695e-05
3.90625e-06	1.66016e-05	1.46484e-05	7.8125e-06	-1.17188e-05	3.90625e-06	1.75781e-05	7.8125e-06	-4.00391e-05	1.5625e-05	-0.00037207	5.61523e-05
2.92969e-06	1.5625e-05	1.36719e-05	6.83594e-06	9.76563e-06	2.68555e-06	6.83594e-05	1.07422e-05	-6.73828e-05	1.66016e-05	-0.000158203	5.85937e-05
5.37109e-06	1.75781e-05	1.5625e-05	8.78906e-06	5.17578e-05	3.41797e-06	0.000101562	1.5625e-05	9.86328e-05	1.46484e-05	-1.26953e-05	4.39453e-05
4.88281e-06	1.66016e-05	1.5625e-05	8.78906e-06	8.00781e-05	5.12695e-06	0.000107422	1.85547e-05	0.000110352	1.5625e-05	1.17188e-05	4.15039e-05
4.39453e-06	1.66016e-05	1.66016e-05	6.34766e-06	5.95703e-05	4.15039e-06	7.32422e-05	1.75781e-05	4.88281e-05	1.66016e-05	0.000135742	3.17383e-05
3.90625e-06	1.75781e-05	1.66016e-05	5.85938e-06	-3.90625e-06	5.37109e-06	6.83594e-06	1.02539e-05	2.73438e-05	1.66016e-05	0.000239258	3.66211e-05
4.39453e-06	1.66016e-05	1.75781e-05	9.76563e-06	-0.000167969	2.68555e-06	-3.41797e-05	3.41797e-06	3.90625e-05	1.36719e-05	0.000108398	3.66211e-05
6.83594e-06	1.66016e-05	1.66016e-05	1.02539e-05	-9.27734e-05	2.44141e-06	-4.58984e-05	9.76563e-07	4.49219e-05	1.5625e-05	7.61719e-05	3.90625e-05
5.85938e-06	1.66016e-05	1.75781e-05	9.76563e-06	0.000101562	3.66211e-06	-4.58984e-05	2.44141e-06	4.88281e-05	1.5625e-05	6.73828e-05	4.15039e-05
6.34766e-06	1.5625e-05	1.66016e-05	7.32422e-06	3.71094e-05	2.92969e-06	-6.05469e-05	3.41797e-06	4.29687e-05	1.75781e-05	7.32422e-05	4.15039e-05
5.85938e-06	1.66016e-05	1.75781e-05	1.02539e-05	-9.47266e-05	7.32422e-07	-3.02734e-05	4.88281e-06	3.32031e-05	1.5625e-05	4.49219e-05	3.66211e-05
6.34766e-06	1.75781e-05	1.75781e-05	8.30078e-06	-2.92969e-05	1.95313e-06	2.05078e-05	7.32422e-06	1.66016e-05	1.5625e-05	-0.000138672	4.39453e-05
6.83594e-06	1.66016e-05	1.75781e-05	7.8125e-06	5.56641e-05	2.44141e-07	3.71094e-05	9.27734e-06	3.90625e-06	1.36719e-05	-0.000208984	4.39453e-05
8.30078e-06	1.5625e-05	1.75781e-05	8.78906e-06	0.000128906	-4.88281e-07	7.03125e-05	7.32422e-06	-8.78906e-06	1.95313e-05	0.000169922	4.63867e-05
7.8125e-06	1.5625e-05	1.5625e-05	7.32422e-06	0.000178711	4.63867e-06	0.000108398	5.37109e-06	-1.66016e-05	1.75781e-05	0.000230469	4.15039e-05
6.34766e-06	1.66016e-05	1.36719e-05	6.83594e-06	0.000145508	7.08008e-06	6.44531e-05	8.78906e-06	-2.14844e-05	1.66016e-05	0.000141602	4.39453e-05
8.30078e-06	1.5625e-05	1.75781e-05	7.32422e-06	-6.34766e-05	9.27734e-06	-4.98047e-05	8.30078e-06	-1.26953e-05	1.75781e-05	-6.54297e-05	4.63867e-05
8.30078e-06	1.66016e-05	1.75781e-05	8.30078e-06	-7.12891e-05	9.27734e-06	-0.000213867	1.2207e-05	-1.66016e-05	1.66016e-05	-0.00028125	4.88281e-05
1.07422e-05	1.66016e-05	1.95313e-05	8.78906e-06	-6.73828e-05	1.00098e-05	-0.00015918	1.17188e-05	-2.83203e-05	1.66016e-05	-0.00037207	4.39453e-05
1.17188e-05	1.75781e-05	2.05078e-05	8.78906e-06	-4.19922e-05	1.07422e-05	5.85938e-06	1.02539e-05	-3.51562e-05	1.85547e-05	-0.000277344	4.63867e-05
1.17188e-05	1.85547e-05	1.85547e-05	8.78906e-06	-3.90625e-06	6.5918e-06	0.000109375	9.27734e-06	-3.61328e-05	1.5625e-05	-0.000162109	4.63867e-05
7.32422e-06	1.5625e-05	1.66016e-05	8.78906e-06	5.76172e-05	4.63867e-06	3.22266e-05	1.07422e-05	-4.00391e-05	1.75781e-05	-0.000112305	4.63867e-05
7.8125e-06	1.5625e-05	1.36719e-05	7.32422e-06	4.98047e-05	3.90625e-06	-3.32031e-05	1.2207e-05	-3.02734e-05	1.66016e-05	0.000214844	3.90625e-05
7.32422e-06	1.66016e-05	1.46484e-05	8.78906e-06	-0.000105469	2.44141e-06	4.19922e-05	1.2207e-05	3.51562e-05	1.75781e-05	0.000134766	4.39453e-05
6.83594e-06	1.5625e-05	1.46484e-05	9.27734e-06	-0.000107422	-2.44141e-07	0.000112305	1.26953e-05	5.95703e-05	1.75781e-05	-8.49609e-05	4.15039e-05
4.88281e-06	1.66016e-05	1.5625e-05	6.83594e-06	3.61328e-05	-7.32422e-07	0.000133789	1.41602e-05	7.51953e-05	1.85547e-05	-0.000186523	4.63867e-05
4.88281e-06	1.5625e-05	1.46484e-05	9.27734e-06	6.44531e-05	2.44141e-06	0.000123047	1.26953e-05	1.95313e-05	1.66016e-05	-9.86328e-05	4.39453e-05
0	1.66016e-05	1.5625e-05	9.27734e-06	-2.73438e-05	3.41797e-06	9.86328e-05	1.12305e-05	-0.000164063	1.75781e-05	5.56641e-05	4.15039e-05
-1.02539e-05	1.75781e-05	1.66016e-05	8.30078e-06	-7.51953e-05	2.44141e-06	1.85547e-05	9.76563e-06	-0.000137695	1.66016e-05	0.000162109	3.66211e-05
-1.75781e-05	1.66016e-05	1.85547e-05	6.83594e-06	-9.27734e-05	2.44141e-06	-1.26953e-05	8.78906e-06	-1.95313e-05	1.75781e-05	0.000339844	2.92969e-05
-7.32422e-06	1.66016e-05	1.85547e-05	8.30078e-06	8.69141e-05	4.39453e-06	-3.71094e-05	9.27734e-06	-3.61328e-05	1.75781e-05	0.000254883	2.19727e-05
1.36719e-05	1.85547e-05	1.75781e-05	9.27734e-06	0.000253906	5.37109e-06	4.00391e-05	8.30078e-06	-3.32031e-05	1.95313e-05	-8.78906e-06	2.92969e-05
4.10156e-05	1.66016e-05	1.75781e-05	9.27734e-06	0.000116211	4.88281e-06	-1.95313e-06	1.02539e-05	-7.03125e-05	1.75781e-05	-8.78906e-05	4.63867e-05
6.39648e-05	1.26953e-05	1.5625e-05	8.30078e-06	-5.17578e-05	8.05664e-06	-2.92969e-06	7.8125e-06	2.44141e-05	2.05078e-05	-7.32422e-05	7.08008e-05
5.0293e-05	1.46484e-05	1.66016e-05	6.83594e-06	-2.53906e-05	8.30078e-06	1.07422e-05	6.34766e-06	7.71484e-05	2.05078e-05	-6.83594e-05	6.34766e-05
1.66016e-05	1.5625e-05	1.5625e-05	8.78906e-06	4.6875e-05	9.27734e-06	-9.76563e-07	6.83594e-06	3.90625e-05	1.85547e-05	-1.26953e-05	4.88281e-05
-2.92969e-06	1.46484e-05	1.66016e-05	7.32422e-06	4.10156e-05	3.41797e-06	5.85938e-06	5.85938e-06	3.22266e-05	1.75781e-05	-4.19922e-05	3.90625e-05
-7.8125e-06	1.5625e-05	1.75781e-05	6.34766e-06	7.8125e-06	3.66211e-06	3.51562e-05	8.78906e-06	7.8125e-06	1.75781e-05	-2.92969e-05	3.90625e-05
-8.78906e-06	1.75781e-05	1.85547e-05	8.30078e-06	-1.36719e-05	3.66211e-06	0.000137695	7.8125e-06	-3.61328e-05	1.5625e-05	-4.10156e-05	3.41797e-05
-8.78906e-06	1.85547e-05	1.95313e-05	7.8125e-06	-2.92969e-06	5.37109e-06	0.000182617	5.85938e-06	-5.85938e-06	1.46484e-05	-6.54297e-05	3.90625e-05
-2.44141e-06	1.85547e-05	1.75781e-05	6.83594e-06	-1.46484e-05	6.34766e-06	-4.00391e-05	6.83594e-06	1.46484e-05	1.36719e-05	-4.39453e-05	4.15039e-05
1.02539e-05	1.85547e-05	1.75781e-05	7.8125e-06	-3.90625e-06	4.39453e-06	-0.000262695	8.78906e-06	5.95703e-05	1.95313e-05	-1.17188e-05	3.90625e-05
1.80664e-05	1.75781e-05	9.76563e-06	8.78906e-06	1.07422e-05	2.44141e-06	-0.000235352	8.30078e-06	8.78906e-05	1.85547e-05	-2.14844e-05	3.41797e-05
1.17188e-05	1.5625e-05	4.88281e-06	9.76563e-06	1.26953e-05	3.41797e-06	5.95703e-05	9.27734e-06	5.17578e-05	1.75781e-05	2.53906e-05	3.17383e-05
1.95313e-06	1.46484e-05	8.78906e-06	7.32422e-06	-4.6875e-05	2.68555e-06	0.000154297	1.17188e-05	-3.80859e-05	1.85547e-05	0.000208008	3.41797e-05
-9.76563e-07	1.46484e-05	1.85547e-05	6.34766e-06	2.05078e-05	1.70898e-06	0.000103516	1.07422e-05	-7.71484e-05	1.75781e-05	0.000378906	3.90625e-05
1.61133e-05	1.46484e-05	2.24609e-05	9.27734e-06	0.000195313	2.44141e-06	0.000123047	1.26953e-05	-8.78906e-06	2.05078e-05	0.000196289	3.90625e-05
3.56445e-05	1.36719e-05	2.53906e-05	8.78906e-06	0.000188477	9.76563e-07	0.000126953	1.2207e-05	2.92969e-06	1.75781e-05	0.000116211	3.90625e-05
4.44336e-05	1.5625e-05	2.14844e-05	1.02539e-05	1.66016e-05	0	0.000120117	8.78906e-06	5.85938e-06	1.85547e-05	0.000124023	3.90625e-05
2.58789e-05	1.66016e-05	9.76563e-07	9.76563e-06	-0.000106445	2.44141e-07	8.20313e-05	9.27734e-06	6.83594e-06	1.75781e-05	4.39453e-05	5.12695e-05
-2.63672e-05	1.66016e-05	3.90625e-06	1.2207e-05	-0.000129883	0	2.63672e-05	8.30078e-06	7.8125e-06	1.5625e-05	-3.51562e-05	5.37109e-05
-4.88281e-05	1.66016e-05	1.07422e-05	8.30078e-06	-7.8125e-05	2.44141e-07	-1.36719e-05	9.27734e-06	1.17188e-05	1.75781e-05	-9.57031e-05	4.88281e-05
-5.37109e-06	1.75781e-05	2.05078e-05	5.37109e-06	-2.14844e-05	2.19727e-06	-4.10156e-05	8.78906e-06	3.02734e-05	1.85547e-05	0.000251953	4.15039e-05
1.07422e-05	1.66016e-05	2.14844e-05	4.39453e-06	1.85547e-05	7.56836e-06	-5.07812e-05	4.39453e-06	2.14844e-05	1.75781e-05	0.000196289	4.15039e-05
1.9043e-05	1.36719e-05	1.5625e-05	5.85938e-06	1.75781e-05	6.34766e-06	-4.78516e-05	4.88281e-06	1.75781e-05	1.66016e-05	-7.22656e-05	3.90625e-05
2.44141e-05	1.46484e-05	1.26953e-05	1.26953e-05	3.02734e-05	4.88281e-06	-3.51562e-05	5.85938e-06	1.95313e-05	1.75781e-05	-0.00018457	4.15039e-05
2.44141e-05	1.75781e-05	2.92969e-06	2.14844e-05	5.76172e-05	3.90625e-06	-2.44141e-05	6.34766e-06	2.14844e-05	1.66016e-05	-0.000145508	3.90625e-05
2.14844e-05	1.75781e-05	0	1.66016e-05	7.71484e-05	4.15039e-06	-7.8125e-06	6.34766e-06	2.63672e-05	1.66016e-05	-0.000104492	3.90625e-05
1.5625e-05	1.66016e-05	1.36719e-05	3.90625e-06	7.8125e-05	1.95313e-06	3.125e-05	5.85938e-06	3.32031e-05	1.5625e-05	-2.24609e-05	3.90625e-05
8.30078e-06	1.75781e-05	2.05078e-05	-4.88281e-06	6.73828e-05	2.92969e-06	6.34766e-05	7.32422e-06	3.61328e-05	1.66016e-05	7.22656e-05	4.63867e-05
5.85938e-06	1.5625e-05	2.14844e-05	-1.95313e-06	7.8125e-05	4.63867e-06	6.64063e-05	4.39453e-06	7.22656e-05	1.85547e-05	0.000111328	3.90625e-05
6.34766e-06	1.66016e-05	2.83203e-05	2.44141e-06	6.73828e-05	1.46484e-06	5.56641e-05	4.39453e-06	0.000151367	1.75781e-05	9.47266e-05	3.41797e-05
1.46484e-06	1.75781e-05	4.58984e-05	-2.92969e-06	4.00391e-05	1.2207e-06	3.61328e-05	5.85938e-06	0.000151367	1.75781e-05	4.00391e-05	3.41797e-05
-9.76563e-07	1.5625e-05	3.32031e-05	2.92969e-06	3.22266e-05	1.2207e-06	6.05469e-05	7.8125e-06	9.17969e-05	1.36719e-05	6.83594e-06	3.90625e-05
9.76563e-07	1.95313e-05	1.07422e-05	1.46484e-05	2.63672e-05	9.76563e-07	2.14844e-05	6.83594e-06	-1.26953e-05	1.36719e-05	7.8125e-06	4.15039e-05
1.5625e-05	1.85547e-05	1.95313e-06	1.36719e-05	9.76563e-07	0	-6.73828e-05	7.8125e-06	-3.90625e-06	1.46484e-05	3.32031e-05	4.15039e-05
2.09961e-05	1.85547e-05	9.76563e-07	1.36719e-05	-4.58984e-05	1.95313e-06	-6.25e-05	1.17188e-05	-9.57031e-05	1.26953e-05	5.07812e-05	3.90625e-05
2.00195e-05	1.75781e-05	1.36719e-05	1.17188e-05	-5.95703e-05	1.46484e-06	-5.66406e-05	1.02539e-05	-0.000249023	1.26953e-05	5.95703e-05	4.88281e-05
1.9043e-05	1.46484e-05	2.92969e-05	9.76563e-06	-2.14844e-05	7.32422e-07	2.92969e-05	7.8125e-06	-1.66016e-05	1.5625e-05	4.49219e-05	4.88281e-05
1.36719e-05	1.36719e-05	4.39453e-05	8.78906e-06	2.24609e-05	-2.44141e-07	5.46875e-05	7.32422e-06	0.000371094	1.95313e-05	3.02734e-05	4.15039e-05
-1.36719e-05	1.5625e-05	4.78516e-05	1.12305e-05	2.05078e-05	2.19727e-06	2.73438e-05	8.78906e-06	0.000414062	1.75781e-05	1.36719e-05	3.66211e-05
-3.90625e-05	1.46484e-05	3.51562e-05	4.88281e-06	7.42187e-05	3.17383e-06	2.83203e-05	7.8125e-06	8.98437e-05	1.85547e-05	4.88281e-06	3.90625e-05
-1.85547e-05	1.66016e-05	1.46484e-05	9.76563e-06	0.00022168	2.19727e-06	3.41797e-05	9.27734e-06	-0.000300781	1.75781e-05	-9.76563e-06	3.90625e-05
1.66016e-05	1.66016e-05	-7.8125e-06	8.78906e-06	0.000202148	4.15039e-06	8.59375e-05	6.83594e-06	-0.000701172	1.85547e-05	-1.07422e-05	4.15039e-05
2.63672e-05	1.5625e-05	-9.76563e-07	5.37109e-06	2.44141e-05	2.68555e-06	7.03125e-05	5.85938e-06	-0.000588867	1.85547e-05	-1.26953e-05	3.66211e-05
2.19727e-05	1.46484e-05	3.22266e-05	9.76563e-07	-0.00015332	2.68555e-06	1.17188e-05	5.37109e-06	-7.71484e-05	1.75781e-05	-3.41797e-05	4.15039e-05
1.02539e-05	1.36719e-05	2.14844e-05	1.46484e-06	-0.000191406	2.19727e-06	-1.46484e-05	7.8125e-06	0.000400391	1.5625e-05	-4.6875e-05	3.41797e-05
9.76563e-07	1.36719e-05	-9.76563e-07	7.8125e-06	-0.000115234	2.44141e-07	-9.375e-05	6.34766e-06	0.000568359	1.85547e-05	-4.39453e-05	3.66211e-05
-9.76563e-07	1.66016e-05	-1.17188e-05	1.17188e-05	-7.32422e-05	7.32422e-07	-0.000166992	7.32422e-06	0.000266602	1.66016e-05	-2.73438e-05	3.41797e-05
-4.88281e-07	1.85547e-05	4.88281e-06	5.85938e-06	-2.44141e-05	3.41797e-06	-8.88672e-05	6.34766e-06	0.00012207	1.75781e-05	-5.85938e-06	4.88281e-05
5.85938e-06	2.05078e-05	2.14844e-05	9.27734e-06	9.76563e-06	5.12695e-06	0.000104492	6.34766e-06	7.22656e-05	1.75781e-05	-1.66016e-05	4.63867e-05
9.27734e-06	1.75781e-05	3.22266e-05	3.90625e-06	4.19922e-05	5.12695e-06	0.000142578	6.83594e-06	0.000228516	1.75781e-05	-9.76563e-07	4.15039e-05
1.2207e-05	1.75781e-05	5.66406e-05	1.36719e-05	0.000110352	3.66211e-06	0.000176758	4.39453e-06	0.000299805	1.46484e-05	5.46875e-05	3.90625e-05
1.66016e-05	1.75781e-05	4.00391e-05	1.5625e-05	9.86328e-05	5.61523e-06	7.03125e-05	4.88281e-06	0.000293945	1.66016e-05	8.59375e-05	4.63867e-05
1.5625e-05	1.5625e-05	2.83203e-05	2.14844e-05	7.03125e-05	5.85938e-06	-4.49219e-05	6.34766e-06	-0.000183594	1.5625e-05	8.10547e-05	4.15039e-05
1.41602e-05	1.5625e-05	2.14844e-05	1.85547e-05	-8.78906e-06	3.90625e-06	-2.73438e-05	8.30078e-06	-0.000663086	1.5625e-05	0.000107422	3.90625e-05
1.12305e-05	1.46484e-05	9.76563e-06	-3.41797e-06	-1.66016e-05	3.66211e-06	9.76563e-06	7.8125e-06	-0.000617188	1.66016e-05	8.78906e-06	3.41797e-05
6.83594e-06	1.46484e-05	5.85938e-06	0	0.000119141	4.39453e-06	3.71094e-05	8.78906e-06	-0.000348633	2.05078e-05	-1.07422e-05	3.17383e-05
1.46484e-06	9.76563e-06	-1.17188e-05	1.36719e-05	0.000199219	4.39453e-06	3.90625e-05	7.8125e-06	-0.000103516	1.95313e-05	1.95313e-06	3.41797e-05
-9.76563e-07	1.17188e-05	8.78906e-06	9.27734e-06	0.000138672	3.90625e-06	-0.000103516	7.8125e-06	3.22266e-05	2.05078e-05	-7.22656e-05	4.39453e-05
-1.95313e-06	1.66016e-05	-1.95313e-06	1.61133e-05	-3.71094e-05	3.90625e-06	-0.000165039	4.88281e-06	0.000131836	1.95313e-05	-2.53906e-05	4.39453e-05
-7.8125e-06	1.85547e-05	8.78906e-06	1.2207e-05	-9.66797e-05	6.5918e-06	-4.19922e-05	6.83594e-06	0.000250977	2.05078e-05	0.000253906	3.90625e-05
-9.76563e-06	2.14844e-05	1.85547e-05	1.61133e-05	-5.85937e-05	5.61523e-06	2.73438e-05	8.30078e-06	0.000326172	1.95313e-05	0.000412109	3.17383e-05
-1.70898e-05	2.14844e-05	1.85547e-05	1.02539e-05	-4.10156e-05	5.37109e-06	4.58984e-05	1.07422e-05	0.000256836	2.44141e-05	0.000295898	2.92969e-05
-9.27734e-06	1.95313e-05	1.07422e-05	7.32422e-06	-5.46875e-05	5.85938e-06	9.76563e-06	1.17188e-05	7.42187e-05	2.14844e-05	1.17188e-05	3.66211e-05
2.73438e-05	1.17188e-05	8.78906e-06	9.76563e-06	0.000160156	6.5918e-06	8.10547e-05	1.12305e-05	-1.07422e-05	2.05078e-05	-0.000105469	5.12695e-05
3.90625e-05	1.26953e-05	9.76563e-06	8.78906e-06	0.000182617	4.88281e-06	0.000104492	1.17188e-05	4.19922e-05	1.36719e-05	-0.000222656	4.88281e-05
3.07617e-05	1.5625e-05	1.5625e-05	1.07422e-05	7.8125e-06	5.61523e-06	6.73828e-05	8.30078e-06	0.000182617	1.46484e-05	-0.000173828	4.63867e-05
2.05078e-05	1.36719e-05	2.05078e-05	6.34766e-06	-0.000121094	4.15039e-06	-4.78516e-05	6.34766e-06	0.00015918	1.36719e-05	-7.12891e-05	3.66211e-05
1.36719e-05	1.5625e-05	1.95313e-05	2.92969e-05	-0.00012207	5.85938e-06	-0.000101562	9.27734e-06	8.10547e-05	1.5625e-05	-2.14844e-05	4.39453e-05
1.17188e-05	1.17188e-05	1.5625e-05	1.2207e-05	-7.03125e-05	6.83594e-06	-5.85938e-06	7.8125e-06	-0.00018457	1.46484e-05	7.22656e-05	4.88281e-05
1.46484e-05	1.95313e-05	1.07422e-05	6.34766e-06	-2.92969e-06	7.08008e-06	-6.54297e-05	5.85938e-06	-0.000213867	1.26953e-05	1.95313e-05	4.63867e-05
1.51367e-05	1.75781e-05	-5.85938e-06	0	2.63672e-05	5.37109e-06	2.24609e-05	3.41797e-06	-0.000225586	1.5625e-05	-0.000103516	4.15039e-05
9.76563e-06	1.75781e-05	-1.95313e-06	1.95313e-06	4.49219e-05	5.37109e-06	0.00012793	7.8125e-06	-0.0001875	2.05078e-05	-0.000180664	4.39453e-05
-4.88281e-07	1.85547e-05	1.95313e-06	6.83594e-06	1.26953e-05	4.39453e-06	0.000142578	6.34766e-06	-6.15234e-05	1.75781e-05	-0.000123047	4.63867e-05
-1.02539e-05	1.66016e-05	5.85938e-06	1.17188e-05	0.000145508	4.15039e-06	4.39453e-05	1.07422e-05	6.05469e-05	1.75781e-05	-2.44141e-05	5.12695e-05
-5.85938e-06	1.75781e-05	9.76563e-06	1.07422e-05	0.000285156	3.90625e-06	5.17578e-05	1.02539e-05	0.000210937	1.66016e-05	0.00012207	4.88281e-05
1.95313e-06	1.5625e-05	1.46484e-05	7.8125e-06	0.000199219	3.90625e-06	9.17969e-05	8.30078e-06	0.000283203	1.5625e-05	0.000108398	4.15039e-05
9.76563e-06	1.75781e-05	1.95313e-05	8.30078e-06	-3.71094e-05	3.17383e-06	3.125e-05	9.76563e-06	0.000256836	1.85547e-05	0.000178711	3.90625e-05
1.12305e-05	2.14844e-05	1.66016e-05	8.78906e-06	-0.000116211	1.46484e-06	-8.00781e-05	1.12305e-05	0.000147461	1.95313e-05	0.00015332	3.90625e-05
1.07422e-05	1.85547e-05	1.75781e-05	7.8125e-06	-0.000223633	-9.76563e-07	-0.000104492	9.76563e-06	7.32422e-05	1.85547e-05	0.000175781	3.17383e-05
1.41602e-05	2.05078e-05	1.95313e-05	7.32422e-06	2.44141e-05	4.88281e-07	8.69141e-05	7.32422e-06	7.03125e-05	1.5625e-05	0.000399414	2.92969e-05
1.46484e-05	1.36719e-05	1.85547e-05	1.02539e-05	0.000113281	-1.95313e-06	0.000231445	1.02539e-05	0.000158203	1.36719e-05	0.000291016	3.17383e-05
1.66016e-05	1.17188e-05	1.95313e-05	7.8125e-06	2.05078e-05	-2.44141e-07	0.000105469	1.36719e-05	0.0001875	1.36719e-05	-8.00781e-05	3.90625e-05
1.95313e-05	8.78906e-06	1.85547e-05	5.37109e-06	-6.44531e-05	-1.95313e-06	-5.56641e-05	1.26953e-05	0.000158203	1.36719e-05	-0.000219727	4.15039e-05
1.61133e-05	7.8125e-06	1.66016e-05	4.88281e-06	-0.000123047	2.44141e-06	-0.000160156	1.07422e-05	7.12891e-05	1.5625e-05	-0.00021875	4.39453e-05
1.31836e-05	1.26953e-05	1.95313e-05	4.88281e-06	-0.000110352	8.78906e-06	-0.000157227	1.12305e-05	-0.000102539	1.46484e-05	-0.000107422	3.90625e-05
8.78906e-06	1.5625e-05	1.85547e-05	4.88281e-06	-7.61719e-05	1.26953e-05	-8.49609e-05	1.17188e-05	-0.000164063	1.46484e-05	-3.22266e-05	4.15039e-05
9.27734e-06	2.14844e-05	1.85547e-05	4.88281e-06	-6.83594e-06	1.26953e-05	-4.6875e-05	1.07422e-05	-9.76563e-05	1.46484e-05	-0.000139648	4.63867e-05
8.30078e-06	2.34375e-05	1.85547e-05	5.37109e-06	2.53906e-05	1.00098e-05	-4.10156e-05	9.27734e-06	-6.05469e-05	1.26953e-05	-0.000136719	5.37109e-05
5.85938e-06	2.05078e-05	1.75781e-05	4.88281e-06	4.6875e-05	6.34766e-06	1.17188e-05	1.17188e-05	-3.22266e-05	1.26953e-05	-2.92969e-05	5.12695e-05
8.30078e-06	1.5625e-05	1.85547e-05	5.37109e-06	8.00781e-05	4.15039e-06	8.49609e-05	1.02539e-05	2.34375e-05	1.46484e-05	-3.22266e-05	5.37109e-05
8.78906e-06	1.5625e-05	1.95313e-05	5.37109e-06	6.34766e-05	5.37109e-06	0.000129883	1.07422e-05	4.58984e-05	1.46484e-05	-0.000253906	5.37109e-05
1.02539e-05	1.95313e-05	1.95313e-05	5.37109e-06	2.14844e-05	2.19727e-06	0.000123047	9.27734e-06	7.51953e-05	1.66016e-05	-0.000344727	4.88281e-05
7.8125e-06	1.85547e-05	1.95313e-05	7.32422e-06	0.000116211	4.88281e-07	9.47266e-05	8.30078e-06	9.47266e-05	1.46484e-05	-0.000249023	4.63867e-05
9.27734e-06	1.66016e-05	1.75781e-05	5.37109e-06	0.000116211	4.88281e-07	6.25e-05	3.41797e-06	9.76563e-05	1.66016e-05	-6.34766e-05	3.90625e-05
7.8125e-06	1.5625e-05	1.85547e-05	8.78906e-06	1.46484e-05	-7.32422e-07	3.41797e-05	7.8125e-06	8.00781e-05	1.36719e-05	0.000245117	3.41797e-05
3.41797e-06	1.5625e-05	1.75781e-05	3.90625e-06	-8.59375e-05	-2.92969e-06	1.5625e-05	8.78906e-06	5.17578e-05	1.66016e-05	0.000438477	3.17383e-05
4.88281e-06	1.66016e-05	1.66016e-05	5.85938e-06	-0.00012793	-4.88281e-06	0	8.78906e-06	0.000104492	1.46484e-05	0.000460937	2.92969e-05
4.39453e-06	1.85547e-05	1.66016e-05	6.34766e-06	-4.78516e-05	-2.68555e-06	-1.5625e-05	6.83594e-06	0.000120117	1.75781e-05	0.000454102	3.17383e-05
6.34766e-06	1.5625e-05	1.85547e-05	7.32422e-06	0.000139648	-4.88281e-07	-2.34375e-05	7.8125e-06	-3.41797e-05	1.85547e-05	0.000286133	3.90625e-05
5.85938e-06	1.46484e-05	2.14844e-05	7.8125e-06	0.000431641	9.76563e-07	-1.26953e-05	8.78906e-06	-0.000223633	1.75781e-05	5.85938e-06	4.63867e-05
5.37109e-06	1.26953e-05	2.05078e-05	7.8125e-06	0.000270508	-1.46484e-06	-5.85938e-06	7.8125e-06	-0.000282227	1.5625e-05	-0.000167969	4.15039e-05
5.37109e-06	1.26953e-05	2.14844e-05	6.34766e-06	-0.000208008	9.76563e-07	-5.85938e-06	8.30078e-06	-0.000103516	1.85547e-05	-0.000214844	3.90625e-05
5.85938e-06	1.66016e-05	2.14844e-05	7.32422e-06	-0.000473633	1.46484e-06	-1.26953e-05	7.8125e-06	3.90625e-05	1.5625e-05	-0.000162109	2.92969e-05
6.34766e-06	1.66016e-05	2.05078e-05	6.34766e-06	-0.000294922	3.90625e-06	-8.78906e-06	8.78906e-06	0.000194336	1.75781e-05	-0.000118164	3.90625e-05
6.34766e-06	1.66016e-05	1.75781e-05	7.8125e-06	-8.98437e-05	7.32422e-06	1.95313e-05	9.76563e-06	0.000350586	1.5625e-05	-9.375e-05	5.12695e-05
6.83594e-06	1.66016e-05	1.95313e-05	1.17188e-05	-7.8125e-06	7.8125e-06	3.71094e-05	7.8125e-06	0.000318359	1.66016e-05	-8.20313e-05	5.37109e-05
6.34766e-06	1.85547e-05	1.75781e-05	9.27734e-06	2.53906e-05	1.0498e-05	-1.07422e-05	7.32422e-06	7.42187e-05	1.66016e-05	-5.37109e-05	4.39453e-05
6.83594e-06	1.85547e-05	1.95313e-05	1.02539e-05	6.44531e-05	1.17188e-05	-7.22656e-05	7.8125e-06	-0.000106445	1.95313e-05	-4.98047e-05	4.39453e-05
5.85938e-06	1.85547e-05	1.85547e-05	9.27734e-06	2.63672e-05	8.54492e-06	-5.17578e-05	9.76563e-06	-0.000163086	1.95313e-05	-4.78516e-05	4.63867e-05
4.88281e-06	1.75781e-05	1.85547e-05	7.8125e-06	0.000179687	8.30078e-06	3.80859e-05	1.17188e-05	-0.000246094	1.75781e-05	-5.85937e-05	4.15039e-05
7.32422e-06	1.85547e-05	1.66016e-05	6.83594e-06	0.000238281	7.56836e-06	0.000110352	7.8125e-06	-0.000254883	1.85547e-05	-4.6875e-05	3.90625e-05
6.34766e-06	1.66016e-05	1.66016e-05	7.32422e-06	0.000107422	5.37109e-06	0.000105469	6.83594e-06	-0.00021582	2.05078e-05	1.95313e-06	3.90625e-05
4.88281e-07	1.26953e-05	1.75781e-05	8.78906e-06	8.49609e-05	1.95313e-06	3.32031e-05	5.85938e-06	-6.83594e-05	1.95313e-05	5.85938e-06	3.90625e-05
-6.34766e-06	1.66016e-05	1.66016e-05	8.78906e-06	0.000110352	3.17383e-06	-1.07422e-05	6.34766e-06	-5.85938e-06	1.66016e-05	0.00015918	3.90625e-05
-5.37109e-06	1.5625e-05	1.85547e-05	9.27734e-06	6.05469e-05	2.68555e-06	3.51562e-05	5.37109e-06	5.85937e-05	1.75781e-05	0.000506836	3.90625e-05
8.78906e-06	1.5625e-05	1.95313e-05	9.27734e-06	-1.5625e-05	1.95313e-06	6.15234e-05	6.34766e-06	9.96094e-05	1.66016e-05	0.000274414	4.15039e-05
2.34375e-05	1.66016e-05	1.75781e-05	6.83594e-06	-5.17578e-05	-1.70898e-06	1.26953e-05	5.85938e-06	6.05469e-05	1.66016e-05	3.41797e-05	3.90625e-05
3.85742e-05	1.5625e-05	1.75781e-05	9.76563e-06	-5.66406e-05	4.88281e-07	-5.46875e-05	7.8125e-06	2.53906e-05	1.66016e-05	-0.000143555	4.39453e-05
3.27148e-05	1.46484e-05	1.75781e-05	9.27734e-06	-0.000175781	1.2207e-06	-3.41797e-05	6.34766e-06	4.49219e-05	1.46484e-05	-0.000204102	4.63867e-05
5.37109e-06	1.85547e-05	1.95313e-05	8.78906e-06	-0.000212891	4.88281e-07	2.63672e-05	7.32422e-06	0.000144531	1.5625e-05	-0.000226563	4.63867e-05
-1.17188e-05	1.75781e-05	1.85547e-05	1.12305e-05	0	1.46484e-06	9.27734e-05	9.27734e-06	6.83594e-05	1.75781e-05	-0.000198242	3.90625e-05
-1.07422e-05	1.66016e-05	1.5625e-05	8.30078e-06	0.000126953	3.41797e-06	7.61719e-05	8.30078e-06	-3.41797e-05	1.85547e-05	-8.69141e-05	3.90625e-05
0	1.95313e-05	1.5625e-05	8.30078e-06	6.25e-05	5.12695e-06	1.5625e-05	6.83594e-06	-2.63672e-05	1.46484e-05	0.000113281	3.90625e-05
7.8125e-06	1.66016e-05	1.5625e-05	8.30078e-06	0.000208008	3.41797e-06	-9.76563e-07	8.78906e-06	7.22656e-05	1.66016e-05	0.00021875	4.63867e-05
9.27734e-06	1.66016e-05	1.5625e-05	8.78906e-06	0.000313477	5.12695e-06	2.83203e-05	7.8125e-06	5.27344e-05	1.85547e-05	0.000140625	4.15039e-05
-4.88281e-07	1.66016e-05	1.66016e-05	8.78906e-06	0.000199219	4.39453e-06	4.88281e-05	6.83594e-06	-0.00012207	1.75781e-05	0.000107422	3.90625e-05
-1.07422e-05	1.66016e-05	1.5625e-05	7.8125e-06	9.76563e-07	2.92969e-06	3.80859e-05	6.83594e-06	-0.000246094	1.5625e-05	0.000271484	2.92969e-05
1.61133e-05	1.5625e-05	1.66016e-05	7.8125e-06	-0.000112305	7.08008e-06	4.88281e-06	1.07422e-05	-9.66797e-05	1.75781e-05	0.000229492	2.44141e-05
5.37109e-05	1.5625e-05	1.5625e-05	8.78906e-06	-4.98047e-05	6.10352e-06	2.24609e-05	8.30078e-06	0.000200195	1.85547e-05	5.27344e-05	3.41797e-05
2.73438e-05	2.34375e-05	1.36719e-05	9.27734e-06	7.32422e-05	3.41797e-06	4.49219e-05	9.76563e-06	0.000266602	2.05078e-05	0.000108398	5.12695e-05
6.34766e-06	5.07812e-05	1.36719e-05	8.78906e-06	6.73828e-05	1.2207e-06	4.10156e-05	7.8125e-06	-6.83594e-06	1.85547e-05	3.51562e-05	4.63867e-05
-4.88281e-07	-6.64063e-05	1.5625e-05	9.76563e-06	-6.15234e-05	6.34766e-06	2.83203e-05	7.32422e-06	-0.000250977	1.95313e-05	-0.000108398	4.88281e-05
2.92969e-06	-1.95313e-06	1.75781e-05	8.30078e-06	-0.000168945	3.90625e-06	2.92969e-05	5.85938e-06	-0.000256836	1.75781e-05	-0.000198242	4.39453e-05
4.39453e-06	4.88281e-05	1.46484e-05	7.8125e-06	-0.000162109	2.68555e-06	3.02734e-05	4.39453e-06	-0.000217773	1.5625e-05	-0.000179687	4.63867e-05
7.8125e-06	3.71094e-05	1.5625e-05	8.30078e-06	-6.83594e-05	2.44141e-06	-3.02734e-05	6.34766e-06	-4.39453e-05	1.5625e-05	-0.000146484	3.66211e-05
1.17188e-05	2.63672e-05	1.46484e-05	7.8125e-06	2.05078e-05	4.15039e-06	-5.85937e-05	8.30078e-06	0.000147461	1.95313e-05	-6.34766e-05	3.90625e-05
1.46484e-05	2.24609e-05	1.5625e-05	8.30078e-06	4.10156e-05	4.88281e-06	-2.63672e-05	9.76563e-06	0.000183594	1.95313e-05	4.88281e-06	4.88281e-05
1.31836e-05	2.05078e-05	1.75781e-05	8.78906e-06	5.46875e-05	5.61523e-06	2.05078e-05	9.27734e-06	0.000211914	1.95313e-05	6.34766e-05	4.88281e-05
1.17188e-05	1.46484e-05	1.5625e-05	1.02539e-05	7.8125e-05	2.19727e-06	1.95313e-06	1.07422e-05	0.000197266	1.75781e-05	0.000113281	3.41797e-05
5.85938e-06	1.36719e-05	1.46484e-05	1.07422e-05	9.86328e-05	2.44141e-06	0	9.76563e-06	9.96094e-05	1.46484e-05	0.000170898	3.41797e-05
5.85938e-06	1.26953e-05	1.5625e-05	9.27734e-06	9.86328e-05	4.88281e-07	3.80859e-05	7.32422e-06	2.44141e-05	1.26953e-05	0.000208984	2.92969e-05
1.31836e-05	1.07422e-05	1.5625e-05	8.30078e-06	9.27734e-05	2.44141e-06	4.29687e-05	7.8125e-06	1.5625e-05	1.5625e-05	0.000166016	3.17383e-05
1.61133e-05	1.5625e-05	1.36719e-05	8.30078e-06	7.22656e-05	3.90625e-06	6.25e-05	9.76563e-06	2.44141e-05	1.66016e-05	0.000173828	3.66211e-05
2.05078e-05	1.26953e-05	1.46484e-05	8.78906e-06	9.08203e-05	5.12695e-06	0.000183594	1.26953e-05	3.90625e-06	1.66016e-05	0.000234375	4.39453e-05
2.19727e-05	1.36719e-05	1.5625e-05	9.27734e-06	9.375e-05	3.90625e-06	0.000173828	1.12305e-05	4.19922e-05	1.26953e-05	0.000114258	3.90625e-05
-9.76563e-07	1.36719e-05	1.36719e-05	7.8125e-06	5.37109e-05	3.41797e-06	9.57031e-05	1.07422e-05	2.05078e-05	1.95313e-05	-4.39453e-05	4.39453e-05
-2.68555e-05	1.5625e-05	1.46484e-05	7.8125e-06	9.76563e-07	2.68555e-06	2.83203e-05	8.78906e-06	3.125e-05	1.66016e-05	-0.00018457	3.66211e-05
-1.12305e-05	1.66016e-05	1.26953e-05	9.27734e-06	-1.95313e-06	1.46484e-06	-0.000154297	6.34766e-06	4.00391e-05	1.66016e-05	-0.000146484	3.66211e-05
-4.88281e-07	1.66016e-05	1.5625e-05	9.27734e-06	-1.07422e-05	1.95313e-06	-0.000277344	4.88281e-06	-4.10156e-05	1.66016e-05	-7.91016e-05	4.15039e-05
-6.83594e-06	1.75781e-05	1.46484e-05	8.78906e-06	-6.93359e-05	1.2207e-06	-0.000145508	7.32422e-06	7.22656e-05	2.14844e-05	-1.85547e-05	5.12695e-05
-2.14844e-05	1.66016e-05	1.26953e-05	9.27734e-06	-9.86328e-05	1.2207e-06	-0.000118164	5.85938e-06	0.000279297	1.85547e-05	-2.44141e-05	4.39453e-05
-2.88086e-05	1.66016e-05	1.26953e-05	9.27734e-06	-8.88672e-05	2.92969e-06	-1.75781e-05	7.8125e-06	0.000261719	1.75781e-05	4.88281e-06	3.90625e-05
-2.49023e-05	1.75781e-05	2.14844e-05	8.30078e-06	-6.93359e-05	2.44141e-06	0.000138672	4.88281e-06	8.20313e-05	1.5625e-05	4.88281e-05	3.90625e-05
4.88281e-06	1.66016e-05	2.53906e-05	9.76563e-06	-5.37109e-05	1.70898e-06	0.00015332	4.88281e-06	-0.000266602	2.05078e-05	5.85938e-06	4.39453e-05
2.19727e-05	1.5625e-05	2.14844e-05	8.78906e-06	-1.66016e-05	3.41797e-06	0.000105469	5.37109e-06	-0.00037207	1.75781e-05	-6.15234e-05	4.88281e-05
3.80859e-05	1.5625e-05	1.5625e-05	8.30078e-06	2.14844e-05	3.66211e-06	7.12891e-05	6.34766e-06	-0.000182617	1.85547e-05	3.51562e-05	4.88281e-05
3.95508e-05	1.5625e-05	1.17188e-05	8.30078e-06	2.14844e-05	3.66211e-06	8.78906e-06	1.02539e-05	1.75781e-05	1.75781e-05	4.39453e-05	3.90625e-05
3.51562e-05	1.5625e-05	1.17188e-05	7.32422e-06	2.83203e-05	4.15039e-06	-3.41797e-05	1.46484e-05	-0.000126953	1.46484e-05	1.17188e-05	4.15039e-05
2.63672e-05	1.66016e-05	1.5625e-05	9.76563e-06	3.90625e-05	3.90625e-06	-3.80859e-05	1.95313e-05	-7.71484e-05	1.46484e-05	-9.76563e-06	3.66211e-05
1.31836e-05	1.5625e-05	1.75781e-05	8.78906e-06	4.78516e-05	4.39453e-06	0	2.09961e-05	0.000193359	1.46484e-05	0	3.41797e-05
1.51367e-05	1.5625e-05	1.66016e-05	8.30078e-06	5.07812e-05	4.63867e-06	2.63672e-05	1.46484e-05	0.000416016	1.66016e-05	9.76563e-07	3.90625e-05
1.2207e-05	1.66016e-05	1.75781e-05	6.34766e-06	4.78516e-05	5.12695e-06	4.58984e-05	8.30078e-06	0.000511719	1.85547e-05	2.83203e-05	4.63867e-05
1.5625e-05	1.66016e-05	1.75781e-05	9.76563e-06	4.19922e-05	2.44141e-06	3.51562e-05	5.37109e-06	0.00043457	1.95313e-05	4.10156e-05	4.39453e-05
1.41602e-05	1.66016e-05	2.24609e-05	7.8125e-06	3.61328e-05	5.37109e-06	1.26953e-05	6.34766e-06	0.000185547	2.05078e-05	7.42187e-05	3.90625e-05
7.8125e-06	1.5625e-05	1.5625e-05	8.78906e-06	2.92969e-05	2.44141e-06	1.46484e-05	5.85938e-06	-7.8125e-05	1.07422e-05	2.44141e-05	3.66211e-05
-1.95313e-06	1.36719e-05	8.78906e-06	7.8125e-06	2.53906e-05	1.46484e-06	8.78906e-06	6.83594e-06	-0.000258789	2.05078e-05	3.61328e-05	4.88281e-05
-4.88281e-07	1.5625e-05	1.26953e-05	8.78906e-06	1.26953e-05	9.76563e-07	-7.8125e-06	6.83594e-06	-0.000198242	1.95313e-05	1.95313e-05	4.63867e-05
4.88281e-06	1.46484e-05	1.46484e-05	8.78906e-06	-0.000118164	2.92969e-06	-2.14844e-05	8.78906e-06	-0.000253906	1.75781e-05	-5.76172e-05	4.39453e-05
1.07422e-05	1.66016e-05	1.75781e-05	9.27734e-06	-5.85937e-05	3.66211e-06	-2.73438e-05	6.34766e-06	-0.000265625	1.75781e-05	-7.32422e-05	3.90625e-05
6.34766e-06	1.66016e-05	1.66016e-05	7.32422e-06	0.000142578	1.2207e-06	-1.85547e-05	7.8125e-06	-0.000192383	1.75781e-05	-4.29687e-05	4.15039e-05
8.30078e-06	1.5625e-05	1.66016e-05	8.30078e-06	8.00781e-05	1.2207e-06	-2.92969e-06	6.34766e-06	-8.30078e-05	1.75781e-05	-5.17578e-05	3.90625e-05
6.83594e-06	1.75781e-05	1.75781e-05	7.8125e-06	-3.90625e-05	1.70898e-06	1.46484e-05	1.02539e-05	5.17578e-05	1.85547e-05	-1.26953e-05	4.15039e-05
-1.12305e-05	1.5625e-05	1.5625e-05	8.30078e-06	-3.125e-05	3.17383e-06	2.53906e-05	8.78906e-06	7.42187e-05	1.95313e-05	8.59375e-05	3.90625e-05
-2.24609e-05	1.36719e-05	1.75781e-05	7.32422e-06	1.17188e-05	7.32422e-07	2.73438e-05	9.27734e-06	5.37109e-05	1.85547e-05	0.000144531	4.15039e-05
-2.92969e-05	1.46484e-05	1.46484e-05	6.83594e-06	4.00391e-05	1.95313e-06	3.02734e-05	1.07422e-05	2.44141e-05	1.5625e-05	8.59375e-05	3.90625e-05
-1.9043e-05	1.46484e-05	1.5625e-05	8.78906e-06	6.15234e-05	5.61523e-06	2.44141e-05	9.76563e-06	7.91016e-05	1.66016e-05	5.46875e-05	4.39453e-05
4.88281e-06	1.66016e-05	1.75781e-05	8.78906e-06	5.95703e-05	6.34766e-06	2.34375e-05	8.78906e-06	7.71484e-05	1.75781e-05	0.000151367	4.39453e-05
3.27148e-05	1.5625e-05	1.75781e-05	7.32422e-06	4.78516e-05	9.27734e-06	2.73438e-05	7.8125e-06	3.02734e-05	1.5625e-05	9.86328e-05	4.63867e-05
6.5918e-05	1.5625e-05	1.75781e-05	7.32422e-06	8.39844e-05	7.56836e-06	2.83203e-05	1.07422e-05	-4.88281e-05	1.26953e-05	-0.000139648	4.39453e-05
9.22852e-05	1.75781e-05	1.66016e-05	8.78906e-06	0.000123047	5.85938e-06	2.92969e-05	1.17188e-05	-3.02734e-05	1.75781e-05	-0.000140625	4.39453e-05
6.54297e-05	1.85547e-05	1.66016e-05	8.78906e-06	5.17578e-05	3.90625e-06	2.83203e-05	8.30078e-06	2.14844e-05	1.36719e-05	-7.42187e-05	4.15039e-05
2.68555e-05	1.85547e-05	1.5625e-05	7.8125e-06	9.76563e-06	4.88281e-06	2.34375e-05	9.27734e-06	4.6875e-05	1.85547e-05	7.42187e-05	4.15039e-05
6.83594e-06	1.07422e-05	1.66016e-05	9.27734e-06	-3.61328e-05	5.37109e-06	6.83594e-05	7.8125e-06	1.07422e-05	1.66016e-05	6.25e-05	3.41797e-05
-4.88281e-07	1.75781e-05	1.66016e-05	6.83594e-06	-6.05469e-05	3.66211e-06	0.000142578	3.41797e-06	-3.32031e-05	1.75781e-05	-6.25e-05	3.90625e-05
-8.78906e-06	1.75781e-05	1.36719e-05	6.34766e-06	-5.27344e-05	-1.2207e-06	0.000102539	1.95313e-06	-1.85547e-05	1.5625e-05	-2.05078e-05	4.39453e-05
-6.83594e-06	1.75781e-05	1.75781e-05	6.83594e-06	-1.66016e-05	0	-2.34375e-05	4.39453e-06	-4.88281e-05	1.95313e-05	0	5.12695e-05
-9.76563e-06	1.85547e-05	1.5625e-05	9.27734e-06	-3.90625e-06	7.32422e-07	-0.0001875	4.88281e-06	-8.10547e-05	1.5625e-05	-4.78516e-05	4.15039e-05
-8.78906e-06	1.85547e-05	1.36719e-05	1.02539e-05	-1.46484e-05	-2.44141e-07	-0.000208008	7.32422e-06	7.32422e-05	1.75781e-05	-5.37109e-05	4.39453e-05
-2.92969e-06	1.95313e-05	1.66016e-05	8.78906e-06	-2.53906e-05	-2.44141e-07	-2.92969e-05	9.27734e-06	7.42187e-05	1.75781e-05	-2.92969e-05	3.66211e-05
0	2.05078e-05	1.66016e-05	7.8125e-06	6.83594e-06	7.32422e-07	0.000131836	1.2207e-05	-1.07422e-05	1.66016e-05	-3.32031e-05	4.15039e-05
8.30078e-06	1.75781e-05	1.5625e-05	7.8125e-06	0.000103516	3.17383e-06	0.000150391	9.76563e-06	7.8125e-06	1.46484e-05	0.000294922	4.88281e-05
1.07422e-05	1.66016e-05	1.46484e-05	8.78906e-06	7.8125e-05	3.90625e-06	0.000172852	8.30078e-06	1.75781e-05	1.75781e-05	0.00015332	4.63867e-05
3.41797e-06	1.66016e-05	1.5625e-05	6.83594e-06	4.88281e-06	5.85938e-06	0.00015625	7.8125e-06	2.63672e-05	1.66016e-05	-0.00012793	3.41797e-05
0	1.66016e-05	1.5625e-05	7.8125e-06	-9.76563e-07	9.0332e-06	7.91016e-05	1.02539e-05	6.54297e-05	1.75781e-05	-0.000144531	3.66211e-05
9.76563e-07	1.5625e-05	1.75781e-05	8.30078e-06	4.49219e-05	7.56836e-06	-4.10156e-05	9.27734e-06	7.22656e-05	1.46484e-05	-1.66016e-05	3.41797e-05
2.92969e-06	1.17188e-05	1.75781e-05	7.8125e-06	0.000126953	7.08008e-06	-2.92969e-05	9.27734e-06	7.03125e-05	1.46484e-05	8.59375e-05	3.41797e-05
4.39453e-06	1.5625e-05	1.75781e-05	1.02539e-05	0.000110352	8.78906e-06	-7.61719e-05	5.85938e-06	7.42187e-05	1.5625e-05	3.32031e-05	3.90625e-05
9.76563e-07	1.75781e-05	1.46484e-05	8.78906e-06	4.78516e-05	9.52148e-06	-0.000168945	3.90625e-06	4.29687e-05	1.36719e-05	9.17969e-05	4.39453e-05
1.95313e-06	1.75781e-05	2.05078e-05	9.27734e-06	9.76563e-07	7.08008e-06	-0.000105469	7.32422e-06	3.22266e-05	1.17188e-05	8.30078e-05	4.15039e-05
5.37109e-06	1.75781e-05	2.92969e-05	6.83594e-06	-4.6875e-05	4.88281e-06	4.39453e-05	6.83594e-06	3.90625e-05	1.66016e-05	0.000282227	4.15039e-05
7.32422e-06	1.95313e-05	5.85938e-06	8.78906e-06	-3.51562e-05	2.92969e-06	0.000125977	6.34766e-06	4.00391e-05	1.5625e-05	0.00031543	3.90625e-05
6.83594e-06	1.75781e-05	1.17188e-05	8.30078e-06	2.83203e-05	1.70898e-06	0.000133789	7.32422e-06	4.98047e-05	1.85547e-05	8.49609e-05	4.39453e-05
7.8125e-06	1.75781e-05	1.66016e-05	6.83594e-06	8.59375e-05	4.39453e-06	0.000134766	7.8125e-06	6.64063e-05	1.66016e-05	-0.00022168	4.15039e-05
7.8125e-06	1.5625e-05	1.75781e-05	9.27734e-06	5.85938e-06	3.17383e-06	0.000181641	7.8125e-06	4.39453e-05	1.46484e-05	-0.00027832	4.15039e-05
8.78906e-06	1.36719e-05	1.07422e-05	8.78906e-06	-0.000121094	2.44141e-06	0.000147461	7.8125e-06	3.51562e-05	1.26953e-05	-0.000137695	3.90625e-05
7.32422e-06	1.5625e-05	1.07422e-05	7.32422e-06	-0.00012207	1.46484e-06	-0.000132813	8.78906e-06	1.95313e-05	1.66016e-05	0.000125	4.39453e-05
6.34766e-06	1.75781e-05	1.36719e-05	6.83594e-06	-6.64063e-05	9.76563e-07	-0.000376953	8.78906e-06	-4.88281e-05	1.5625e-05	0.000227539	4.39453e-05
6.34766e-06	1.85547e-05	1.75781e-05	2.92969e-06	-2.92969e-05	2.92969e-06	-0.000181641	1.17188e-05	-7.61719e-05	1.75781e-05	6.25e-05	4.39453e-05
7.8125e-06	1.85547e-05	2.14844e-05	3.125e-05	1.5625e-05	3.90625e-06	6.34766e-05	8.30078e-06	1.75781e-05	1.46484e-05	-0.000304687	4.15039e-05
8.78906e-06	1.95313e-05	2.05078e-05	8.78906e-06	1.26953e-05	4.15039e-06	0.000133789	5.85938e-06	0.000226563	1.85547e-05	-3.71094e-05	3.90625e-05
8.30078e-06	1.85547e-05	2.14844e-05	0	0	3.41797e-06	0.000145508	5.37109e-06	0.000342773	1.66016e-05	0.000264648	3.66211e-05
8.78906e-06	1.66016e-05	1.5625e-05	-2.44141e-06	6.83594e-06	4.63867e-06	0.000135742	5.85938e-06	0.000203125	1.95313e-05	0.000325195	3.90625e-05
7.8125e-06	1.66016e-05	1.75781e-05	-9.76563e-07	2.44141e-05	5.61523e-06	6.83594e-05	5.37109e-06	2.34375e-05	1.46484e-05	0.000123047	3.17383e-05
8.30078e-06	1.5625e-05	1.95313e-05	6.83594e-06	4.78516e-05	6.10352e-06	-1.46484e-05	9.27734e-06	-9.96094e-05	1.85547e-05	-5.46875e-05	2.92969e-05
9.76563e-06	1.46484e-05	1.5625e-05	1.12305e-05	7.12891e-05	7.08008e-06	-8.69141e-05	1.12305e-05	-0.000172852	1.85547e-05	-7.61719e-05	3.17383e-05
8.30078e-06	1.66016e-05	1.75781e-05	1.2207e-05	8.00781e-05	7.08008e-06	-5.85937e-05	1.36719e-05	-0.000194336	1.95313e-05	-0.000204102	4.15039e-05
6.83594e-06	1.36719e-05	1.36719e-05	1.02539e-05	7.32422e-05	6.83594e-06	-6.83594e-06	1.36719e-05	-0.000158203	1.46484e-05	-0.000229492	4.88281e-05
6.34766e-06	1.46484e-05	1.85547e-05	8.30078e-06	5.46875e-05	6.34766e-06	1.95313e-05	1.46484e-05	-9.375e-05	1.66016e-05	-0.000121094	5.37109e-05
6.34766e-06	1.75781e-05	1.95313e-05	8.30078e-06	2.14844e-05	4.15039e-06	0.000113281	1.12305e-05	-2.05078e-05	1.66016e-05	-0.000167969	4.63867e-05
5.37109e-06	1.66016e-05	1.46484e-05	1.36719e-05	1.95313e-06	2.68555e-06	0.000173828	6.34766e-06	4.00391e-05	1.85547e-05	-6.93359e-05	4.63867e-05
4.88281e-06	1.5625e-05	4.88281e-06	7.32422e-06	-1.46484e-05	2.44141e-06	0.000104492	4.39453e-06	9.47266e-05	1.75781e-05	5.27344e-05	4.39453e-05
3.41797e-06	1.36719e-05	9.76563e-07	1.02539e-05	-2.44141e-05	9.76563e-07	-6.05469e-05	2.92969e-06	0.000109375	1.75781e-05	7.91016e-05	4.63867e-05
2.44141e-06	1.46484e-05	1.07422e-05	3.90625e-06	-1.66016e-05	1.46484e-06	-0.000129883	1.46484e-06	9.27734e-05	1.5625e-05	6.73828e-05	4.63867e-05
4.88281e-07	1.5625e-05	9.76563e-07	6.34766e-06	-1.36719e-05	1.46484e-06	-0.000115234	4.39453e-06	3.125e-05	1.95313e-05	4.00391e-05	4.39453e-05
3.90625e-06	1.46484e-05	8.78906e-06	9.27734e-06	-5.85938e-06	2.44141e-06	-0.000116211	5.85938e-06	2.14844e-05	1.75781e-05	3.80859e-05	3.66211e-05
-5.37109e-06	1.66016e-05	2.24609e-05	1.36719e-05	3.02734e-05	2.44141e-06	-3.61328e-05	6.34766e-06	1.5625e-05	1.85547e-05	-9.76563e-07	3.41797e-05
-6.83594e-06	1.85547e-05	3.51562e-05	1.66016e-05	9.76563e-06	-2.44141e-07	0.000123047	8.30078e-06	5.56641e-05	1.46484e-05	9.47266e-05	3.90625e-05
-6.83594e-06	1.85547e-05	3.51562e-05	1.17188e-05	-2.05078e-05	-9.76563e-07	0.00012207	8.30078e-06	7.22656e-05	1.46484e-05	0.000143555	4.39453e-05
-2.44141e-06	1.75781e-05	3.02734e-05	7.32422e-06	-1.46484e-05	1.95313e-06	1.46484e-05	6.34766e-06	-6.25e-05	1.26953e-05	7.91016e-05	3.66211e-05
-7.32422e-06	1.36719e-05	2.83203e-05	4.39453e-06	2.14844e-05	4.63867e-06	-9.96094e-05	1.12305e-05	-3.22266e-05	1.75781e-05	-2.92969e-05	4.39453e-05
5.85938e-06	1.5625e-05	3.51562e-05	3.90625e-06	0.000121094	5.85938e-06	-4.39453e-05	1.61133e-05	0.000112305	1.75781e-05	-0.000150391	4.39453e-05
8.30078e-06	1.5625e-05	4.19922e-05	9.76563e-07	0.000226563	4.63867e-06	7.32422e-05	1.80664e-05	0.000204102	1.95313e-05	-3.61328e-05	4.88281e-05
-1.41602e-05	1.46484e-05	1.66016e-05	2.92969e-06	0.000128906	3.90625e-06	0.000128906	1.70898e-05	-8.78906e-06	1.85547e-05	2.44141e-05	4.39453e-05
2.05078e-05	1.66016e-05	-1.85547e-05	1.12305e-05	3.125e-05	4.63867e-06	7.03125e-05	1.36719e-05	-0.000246094	1.75781e-05	-1.5625e-05	4.39453e-05
6.93359e-05	1.5625e-05	3.22266e-05	9.27734e-06	7.32422e-05	3.17383e-06	8.78906e-06	8.78906e-06	-0.000363281	1.85547e-05	-0.000106445	3.90625e-05
6.25e-05	1.36719e-05	7.8125e-06	8.30078e-06	3.80859e-05	2.92969e-06	4.19922e-05	6.34766e-06	-0.000333008	2.24609e-05	-0.000100586	4.88281e-05
-4.88281e-07	1.17188e-05	-0.000186523	6.83594e-06	-9.96094e-05	2.19727e-06	7.32422e-05	5.37109e-06	-0.000191406	1.85547e-05	-8.98437e-05	5.12695e-05
-2.97852e-05	1.26953e-05	-0.000182617	6.34766e-06	-0.000251953	1.46484e-06	-7.8125e-06	7.8125e-06	-8.30078e-05	1.75781e-05	-6.54297e-05	4.88281e-05
5.85938e-06	1.5625e-05	-1.07422e-05	4.88281e-06	-0.000249023	7.32422e-07	4.98047e-05	7.32422e-06	0.000157227	1.66016e-05	-1.5625e-05	4.63867e-05
2.83203e-05	1.66016e-05	0.000155273	0	2.53906e-05	-9.76563e-07	1.5625e-05	6.34766e-06	0.000358398	1.75781e-05	-1.95313e-06	4.39453e-05
2.73438e-05	1.5625e-05	0.000211914	0	0.000194336	-2.68555e-06	-6.83594e-05	6.34766e-06	0.000331055	1.66016e-05	-6.83594e-06	3.90625e-05
2.05078e-05	1.75781e-05	0.000112305	4.88281e-06	0.000107422	-3.66211e-06	-8.10547e-05	7.32422e-06	0.000262695	1.95313e-05	3.22266e-05	3.90625e-05
3.90625e-05	1.5625e-05	-4.00391e-05	1.17188e-05	7.8125e-05	-3.41797e-06	-7.32422e-05	8.78906e-06	0.000128906	1.66016e-05	8.10547e-05	3.90625e-05
3.02734e-05	1.5625e-05	-7.42187e-05	1.51367e-05	8.88672e-05	-1.95313e-06	-3.71094e-05	8.30078e-06	4.6875e-05	1.75781e-05	0.000115234	3.90625e-05
-5.37109e-06	1.66016e-05	2.14844e-05	1.5625e-05	-5.07812e-05	-1.70898e-06	3.32031e-05	8.78906e-06	-8.59375e-05	1.75781e-05	0.000124023	3.90625e-05
-1.95313e-05	1.46484e-05	0.000198242	1.31836e-05	-9.08203e-05	5.37109e-06	0.000128906	9.76563e-06	-0.000173828	2.05078e-05	0.000112305	4.15039e-05
-2.00195e-05	1.75781e-05	0.000230469	1.2207e-05	7.8125e-06	5.61523e-06	9.66797e-05	7.32422e-06	-0.00012793	1.5625e-05	8.69141e-05	3.66211e-05
-8.78906e-06	1.5625e-05	5.85937e-05	9.76563e-06	6.83594e-05	7.08008e-06	5.85938e-06	9.27734e-06	-4.10156e-05	1.75781e-05	6.93359e-05	3.90625e-05
1.07422e-05	1.75781e-05	-0.000118164	1.07422e-05	-1.36719e-05	8.30078e-06	-3.51562e-05	1.12305e-05	-0.000107422	1.46484e-05	4.39453e-05	3.90625e-05
1.5625e-05	1.36719e-05	-0.000143555	4.88281e-06	-9.57031e-05	7.32422e-06	-4.88281e-05	9.27734e-06	-9.86328e-05	1.66016e-05	5.66406e-05	4.15039e-05
9.76563e-06	1.26953e-05	-0.000125977	7.32422e-06	-6.15234e-05	7.8125e-06	-1.5625e-05	7.8125e-06	-0.000172852	1.36719e-05	6.64063e-05	3.66211e-05
2.34375e-05	1.46484e-05	-4.29687e-05	6.34766e-06	2.05078e-05	1.12305e-05	-1.95313e-06	9.76563e-06	-0.000222656	1.75781e-05	7.71484e-05	3.90625e-05
3.41797e-05	1.66016e-05	1.5625e-05	4.88281e-06	5.27344e-05	9.52148e-06	6.54297e-05	1.2207e-05	-0.00027832	1.66016e-05	5.07812e-05	3.66211e-05
3.61328e-05	1.95313e-05	0.000132813	2.92969e-06	4.98047e-05	4.39453e-06	9.08203e-05	9.76563e-06	-0.000149414	1.75781e-05	6.25e-05	3.90625e-05
3.22266e-05	1.66016e-05	0.000165039	6.83594e-06	3.32031e-05	5.37109e-06	7.8125e-05	9.27734e-06	7.12891e-05	1.66016e-05	8.69141e-05	4.15039e-05
4.24805e-05	1.66016e-05	0.000167969	8.30078e-06	-7.51953e-05	3.90625e-06	5.76172e-05	8.78906e-06	0.000294922	1.95313e-05	9.66797e-05	5.37109e-05
2.88086e-05	1.46484e-05	8.10547e-05	1.12305e-05	8.20313e-05	2.92969e-06	4.39453e-05	7.8125e-06	0.000458984	1.85547e-05	6.25e-05	4.39453e-05
1.5625e-05	1.36719e-05	-3.80859e-05	1.12305e-05	0.000217773	2.68555e-06	1.85547e-05	8.30078e-06	0.000396484	1.85547e-05	3.22266e-05	3.90625e-05
1.61133e-05	1.36719e-05	-8.88672e-05	1.26953e-05	0.000144531	9.76563e-07	5.85938e-06	7.8125e-06	0.000166016	1.66016e-05	-1.95313e-06	3.41797e-05
1.61133e-05	1.5625e-05	-0.000112305	1.26953e-05	-5.27344e-05	2.44141e-07	-4.88281e-06	8.30078e-06	0.000118164	1.75781e-05	2.92969e-06	4.15039e-05
8.78906e-06	1.75781e-05	2.05078e-05	1.26953e-05	-0.000168945	-7.32422e-07	-5.85938e-06	6.83594e-06	0.000120117	1.66016e-05	1.5625e-05	3.66211e-05
6.83594e-06	2.14844e-05	9.08203e-05	1.07422e-05	-0.000176758	1.46484e-06	0	6.83594e-06	0.000266602	1.75781e-05	3.125e-05	3.66211e-05
2.44141e-06	1.75781e-05	7.51953e-05	1.17188e-05	-9.66797e-05	3.17383e-06	3.90625e-06	7.32422e-06	0.000338867	1.5625e-05	3.80859e-05	3.66211e-05
7.32422e-06	1.46484e-05	6.44531e-05	1.07422e-05	-3.125e-05	5.37109e-06	7.8125e-06	7.32422e-06	0.000186523	2.24609e-05	6.93359e-05	3.90625e-05
9.76563e-07	1.36719e-05	5.46875e-05	1.26953e-05	1.95313e-06	5.12695e-06	1.46484e-05	7.32422e-06	-0.000191406	1.5625e-05	8.20313e-05	3.41797e-05
-2.44141e-06	1.66016e-05	2.34375e-05	1.26953e-05	2.34375e-05	8.05664e-06	1.5625e-05	7.32422e-06	-0.000613281	1.66016e-05	9.17969e-05	3.90625e-05
-1.46484e-06	1.66016e-05	-1.17188e-05	9.76563e-06	3.02734e-05	8.78906e-06	1.26953e-05	5.37109e-06	-0.000602539	1.85547e-05	5.07812e-05	3.90625e-05
3.41797e-06	1.66016e-05	-1.75781e-05	1.02539e-05	5.85937e-05	8.30078e-06	1.36719e-05	6.34766e-06	-0.000369141	1.85547e-05	2.53906e-05	4.15039e-05
6.34766e-06	1.36719e-05	-1.46484e-05	9.27734e-06	4.49219e-05	6.83594e-06	1.5625e-05	5.85938e-06	-0.000113281	1.75781e-05	1.36719e-05	3.66211e-05
8.30078e-06	1.5625e-05	9.76563e-07	8.78906e-06	9.375e-05	5.85938e-06	1.36719e-05	4.39453e-06	0.000234375	1.46484e-05	2.05078e-05	3.41797e-05
2.92969e-06	1.66016e-05	1.07422e-05	1.02539e-05	0.000339844	5.85938e-06	1.07422e-05	5.37109e-06	0.000317383	1.36719e-05	1.26953e-05	3.41797e-05
9.76563e-07	1.66016e-05	1.5625e-05	7.8125e-06	0.000319336	5.85938e-06	1.26953e-05	4.39453e-06	0.000273438	1.5625e-05	2.92969e-06	4.39453e-05
-4.88281e-07	1.85547e-05	1.5625e-05	1.12305e-05	0.000102539	1.2207e-06	1.46484e-05	6.34766e-06	0.000260742	1.5625e-05	-3.90625e-05	4.39453e-05
-4.39453e-06	1.85547e-05	1.26953e-05	1.36719e-05	-0.000128906	4.88281e-07	1.85547e-05	9.76563e-06	0.000232422	1.75781e-05	4.88281e-06	3.90625e-05
4.88281e-07	1.85547e-05	8.78906e-06	1.17188e-05	-0.000189453	2.19727e-06	2.24609e-05	1.12305e-05	0.000188477	1.66016e-05	0.000405273	3.66211e-05
2.44141e-06	1.66016e-05	3.90625e-06	5.37109e-06	-0.000189453	1.46484e-06	3.32031e-05	1.02539e-05	8.69141e-05	2.05078e-05	0.000321289	4.39453e-05
4.88281e-07	1.75781e-05	9.76563e-07	8.30078e-06	-0.000161133	1.2207e-06	3.32031e-05	1.07422e-05	1.95313e-05	1.36719e-05	-8.20313e-05	3.90625e-05
4.88281e-07	1.46484e-05	-1.95313e-06	1.46484e-05	-5.95703e-05	3.17383e-06	3.125e-05	9.27734e-06	-3.41797e-05	1.5625e-05	-0.000118164	4.39453e-05
-2.44141e-06	1.5625e-05	-5.85938e-06	1.31836e-05	4.6875e-05	5.61523e-06	3.51562e-05	6.83594e-06	1.95313e-06	1.5625e-05	-0.000145508	3.90625e-05
-1.95313e-06	1.75781e-05	-1.17188e-05	1.2207e-05	0.000110352	4.15039e-06	7.51953e-05	7.32422e-06	5.37109e-05	1.5625e-05	-0.00028125	3.90625e-05
4.88281e-07	1.46484e-05	-9.76563e-06	6.34766e-06	0.000132813	4.88281e-06	4.98047e-05	5.37109e-06	5.07812e-05	1.46484e-05	-0.000285156	4.39453e-05
-2.44141e-06	1.75781e-05	-1.17188e-05	3.41797e-06	0.000123047	5.85938e-06	-1.17188e-05	6.83594e-06	8.20313e-05	1.66016e-05	-8.98437e-05	4.63867e-05
4.88281e-07	1.85547e-05	-1.26953e-05	6.34766e-06	9.86328e-05	5.85938e-06	-8.39844e-05	3.90625e-06	8.88672e-05	1.26953e-05	3.61328e-05	3.66211e-05
0	1.95313e-05	-1.07422e-05	7.32422e-06	7.51953e-05	4.63867e-06	-0.000124023	2.92969e-06	8.30078e-05	1.66016e-05	9.17969e-05	3.90625e-05
9.76563e-07	1.85547e-05	-8.78906e-06	6.34766e-06	6.34766e-05	2.92969e-06	-5.27344e-05	1.46484e-06	0.000201172	1.46484e-05	0.000302734	3.66211e-05
1.95313e-06	1.66016e-05	-4.88281e-06	8.30078e-06	4.29687e-05	2.68555e-06	-0.000140625	2.44141e-06	0.000303711	1.5625e-05	0.000423828	3.90625e-05
0	1.85547e-05	-1.95313e-06	6.83594e-06	2.44141e-05	1.2207e-06	-9.76563e-06	7.32422e-06	1.66016e-05	1.46484e-05	0.000231445	4.39453e-05
0	1.75781e-05	0	8.78906e-06	1.36719e-05	-2.44141e-07	0.000222656	1.2207e-05	-0.000270508	1.95313e-05	-6.64063e-05	4.88281e-05
4.88281e-07	1.85547e-05	9.76563e-07	7.8125e-06	1.26953e-05	-2.44141e-07	0.000342773	1.5625e-05	-0.000494141	1.66016e-05	-0.000195313	4.39453e-05
2.44141e-06	1.5625e-05	2.92969e-06	3.90625e-06	1.66016e-05	-9.76563e-07	0.000325195	1.75781e-05	-0.000429688	1.95313e-05	-0.000185547	4.15039e-05
9.76563e-07	1.26953e-05	4.88281e-06	4.88281e-06	6.83594e-06	2.44141e-07	0.000335937	1.07422e-05	-0.000150391	1.85547e-05	-0.000160156	4.39453e-05
2.44141e-06	1.5625e-05	5.85938e-06	6.34766e-06	-1.66016e-05	1.95313e-06	0.000140625	8.30078e-06	0.000110352	2.14844e-05	-8.30078e-05	4.63867e-05
4.88281e-06	1.75781e-05	9.76563e-06	4.88281e-06	-6.34766e-05	1.2207e-06	-0.000244141	6.34766e-06	0.000131836	1.85547e-05	-5.95703e-05	4.15039e-05
4.39453e-06	1.95313e-05	1.17188e-05	6.34766e-06	-6.64063e-05	2.68555e-06	-0.00034668	3.41797e-06	0.000146484	1.66016e-05	-3.32031e-05	4.39453e-05
3.90625e-06	1.66016e-05	1.26953e-05	7.32422e-06	0	3.17383e-06	-0.00022168	3.41797e-06	0.000124023	1.36719e-05	-1.75781e-05	3.90625e-05
5.85938e-06	1.75781e-05	1.5625e-05	6.83594e-06	5.95703e-05	4.15039e-06	-9.57031e-05	7.8125e-06	5.66406e-05	1.46484e-05	2.63672e-05	4.15039e-05
6.34766e-06	1.75781e-05	1.5625e-05	5.37109e-06	9.17969e-05	3.90625e-06	-3.22266e-05	9.27734e-06	6.05469e-05	1.36719e-05	6.64063e-05	4.39453e-05
5.85938e-06	1.85547e-05	1.75781e-05	6.34766e-06	8.30078e-05	5.61523e-06	-0.000104492	7.8125e-06	0.000155273	1.36719e-05	1.36719e-05	4.39453e-05
7.32422e-06	1.5625e-05	1.85547e-05	7.8125e-06	1.95313e-05	5.12695e-06	-7.22656e-05	6.34766e-06	0.000107422	1.36719e-05	3.125e-05	3.90625e-05
9.27734e-06	1.5625e-05	1.95313e-05	6.83594e-06	-3.02734e-05	2.68555e-06	4.29687e-05	8.30078e-06	6.83594e-06	1.95313e-05	-3.90625e-05	4.15039e-05
8.30078e-06	1.75781e-05	2.34375e-05	8.30078e-06	4.98047e-05	9.76563e-07	7.12891e-05	1.2207e-05	-4.6875e-05	1.46484e-05	-0.000100586	4.39453e-05
9.27734e-06	1.17188e-05	2.24609e-05	4.88281e-06	0.000119141	1.46484e-06	8.20313e-05	1.5625e-05	-5.37109e-05	1.75781e-05	2.92969e-05	4.63867e-05
9.27734e-06	1.26953e-05	2.53906e-05	5.37109e-06	-1.95313e-06	4.15039e-06	9.375e-05	1.12305e-05	-5.17578e-05	1.75781e-05	2.05078e-05	4.15039e-05
1.12305e-05	1.36719e-05	2.63672e-05	6.34766e-06	-8.10547e-05	7.56836e-06	0.000105469	1.12305e-05	-8.30078e-05	1.75781e-05	-4.98047e-05	3.66211e-05
9.76563e-06	1.46484e-05	2.44141e-05	5.85938e-06	-7.61719e-05	8.30078e-06	6.64063e-05	1.17188e-05	-6.25e-05	1.75781e-05	-9.76563e-05	3.41797e-05
9.76563e-06	1.75781e-05	2.53906e-05	6.34766e-06	-3.61328e-05	1.46484e-06	8.00781e-05	8.78906e-06	2.92969e-06	2.05078e-05	-5.85938e-06	3.66211e-05
1.07422e-05	1.75781e-05	2.53906e-05	7.8125e-06	-6.64063e-05	-7.32422e-07	9.86328e-05	5.37109e-06	-2.83203e-05	1.75781e-05	0.000102539	3.90625e-05
8.78906e-06	1.66016e-05	2.63672e-05	9.27734e-06	0.000208008	-1.70898e-06	3.02734e-05	7.8125e-06	-3.32031e-05	2.05078e-05	0.000174805	4.15039e-05
1.12305e-05	1.75781e-05	2.63672e-05	8.78906e-06	0.00034375	-4.88281e-07	-7.32422e-05	8.30078e-06	-1.36719e-05	1.5625e-05	0.00015332	4.63867e-05
1.07422e-05	1.66016e-05	2.73438e-05	7.32422e-06	-1.17188e-05	-2.44141e-07	-9.375e-05	8.30078e-06	4.88281e-06	1.66016e-05	7.03125e-05	4.88281e-05
1.2207e-05	1.85547e-05	2.63672e-05	6.83594e-06	-0.000226563	7.32422e-07	-6.34766e-05	9.27734e-06	1.36719e-05	1.66016e-05	1.17188e-05	5.37109e-05
1.12305e-05	1.66016e-05	2.53906e-05	5.37109e-06	-0.000139648	5.37109e-06	-5.95703e-05	1.07422e-05	1.66016e-05	1.5625e-05	-4.29687e-05	5.37109e-05
1.17188e-05	1.5625e-05	2.63672e-05	7.8125e-06	-1.36719e-05	3.90625e-06	-6.54297e-05	7.32422e-06	1.75781e-05	1.75781e-05	-6.73828e-05	4.88281e-05
1.07422e-05	1.75781e-05	2.73438e-05	8.30078e-06	4.10156e-05	7.56836e-06	-6.83594e-06	8.78906e-06	2.14844e-05	1.75781e-05	-8.88672e-05	4.63867e-05
1.36719e-05	1.66016e-05	2.63672e-05	7.32422e-06	1.66016e-05	1.09863e-05	-9.76563e-07	8.30078e-06	2.24609e-05	1.5625e-05	-7.8125e-05	3.90625e-05
8.78906e-06	1.66016e-05	2.53906e-05	7.32422e-06	-2.14844e-05	9.27734e-06	-3.125e-05	8.78906e-06	1.5625e-05	1.5625e-05	-3.71094e-05	4.15039e-05
1.2207e-05	1.75781e-05	2.24609e-05	8.30078e-06	-7.32422e-05	5.12695e-06	-4.29687e-05	1.61133e-05	1.75781e-05	1.5625e-05	-1.26953e-05	3.66211e-05
1.17188e-05	1.17188e-05	2.05078e-05	7.8125e-06	8.78906e-06	3.66211e-06	5.85938e-06	1.41602e-05	2.05078e-05	1.75781e-05	4.78516e-05	3.66211e-05
1.12305e-05	1.26953e-05	2.44141e-05	9.76563e-06	5.95703e-05	4.88281e-06	7.51953e-05	1.12305e-05	1.75781e-05	1.66016e-05	8.30078e-05	3.41797e-05
1.12305e-05	1.17188e-05	2.63672e-05	7.8125e-06	0.000341797	2.68555e-06	3.32031e-05	1.2207e-05	2.14844e-05	1.85547e-05	6.93359e-05	3.66211e-05
1.07422e-05	1.46484e-05	2.63672e-05	8.30078e-06	0.000286133	3.66211e-06	8.78906e-06	8.30078e-06	2.53906e-05	1.5625e-05	4.6875e-05	3.17383e-05
1.12305e-05	1.5625e-05	2.63672e-05	8.78906e-06	5.56641e-05	2.92969e-06	1.85547e-05	7.8125e-06	2.63672e-05	1.5625e-05	0.000116211	3.17383e-05
1.07422e-05	1.5625e-05	2.53906e-05	8.78906e-06	-0.00021582	-1.2207e-06	2.34375e-05	6.83594e-06	2.53906e-05	1.66016e-05	0.000105469	4.15039e-05
1.02539e-05	1.5625e-05	2.34375e-05	7.8125e-06	-0.000249023	1.2207e-06	1.95313e-05	8.78906e-06	2.83203e-05	1.75781e-05	6.73828e-05	5.12695e-05
1.07422e-05	1.75781e-05	2.44141e-05	1.02539e-05	-0.000125	1.95313e-06	2.05078e-05	6.83594e-06	2.73438e-05	1.46484e-05	2.14844e-05	4.39453e-05
9.27734e-06	1.95313e-05	2.14844e-05	1.02539e-05	-7.12891e-05	9.76563e-07	1.66016e-05	6.83594e-06	2.05078e-05	1.95313e-05	2.73438e-05	3.41797e-05
9.27734e-06	1.75781e-05	2.14844e-05	9.27734e-06	-4.29687e-05	6.34766e-06	1.95313e-06	7.8125e-06	3.90625e-06	1.85547e-05	5.37109e-05	3.90625e-05
1.02539e-05	1.75781e-05	2.05078e-05	8.78906e-06	9.76563e-07	7.32422e-06	3.90625e-06	8.30078e-06	-2.05078e-05	1.5625e-05	2.05078e-05	4.88281e-05
8.78906e-06	1.5625e-05	1.95313e-05	8.78906e-06	-1.46484e-05	7.08008e-06	1.85547e-05	9.76563e-06	6.25e-05	1.26953e-05	-1.5625e-05	4.63867e-05
7.32422e-06	1.36719e-05	1.85547e-05	7.8125e-06	-4.6875e-05	9.27734e-06	2.44141e-05	9.76563e-06	0.000226563	1.85547e-05	-2.44141e-05	4.15039e-05
8.30078e-06	1.46484e-05	1.95313e-05	7.8125e-06	-4.78516e-05	8.05664e-06	6.34766e-05	8.30078e-06	0.000212891	1.95313e-05	5.17578e-05	4.39453e-05
6.83594e-06	1.75781e-05	2.14844e-05	9.27734e-06	5.76172e-05	6.83594e-06	0.000174805	3.90625e-06	-1.95313e-06	1.5625e-05	6.83594e-05	4.39453e-05
3.90625e-06	1.75781e-05	1.85547e-05	8.30078e-06	0.000204102	7.32422e-06	0.000129883	3.41797e-06	-0.000295898	1.5625e-05	8.20313e-05	3.90625e-05
-2.44141e-06	1.5625e-05	1.85547e-05	1.02539e-05	8.30078e-05	6.83594e-06	2.05078e-05	2.44141e-06	-0.000421875	1.46484e-05	-3.90625e-06	3.66211e-05
-2.44141e-06	1.75781e-05	1.75781e-05	9.76563e-06	-1.5625e-05	3.66211e-06	-5.37109e-05	5.37109e-06	-0.000535156	1.66016e-05	-7.12891e-05	3.17383e-05
7.8125e-06	1.5625e-05	2.05078e-05	8.78906e-06	7.12891e-05	2.19727e-06	-7.71484e-05	6.34766e-06	-0.000195313	1.85547e-05	-4.58984e-05	4.63867e-05
2.49023e-05	1.66016e-05	2.44141e-05	9.76563e-06	5.27344e-05	4.88281e-07	-4.10156e-05	8.30078e-06	0.000213867	1.95313e-05	-5.85938e-06	4.15039e-05
3.41797e-05	1.85547e-05	2.53906e-05	8.78906e-06	-5.56641e-05	2.68555e-06	5.85937e-05	7.32422e-06	0.000248047	2.05078e-05	2.05078e-05	3.66211e-05
3.95508e-05	1.75781e-05	2.14844e-05	1.02539e-05	-6.34766e-05	2.92969e-06	9.57031e-05	8.30078e-06	0.000233398	1.85547e-05	4.00391e-05	3.66211e-05
2.14844e-05	1.66016e-05	1.75781e-05	8.78906e-06	-1.95313e-06	6.10352e-06	8.10547e-05	8.30078e-06	0.000367188	1.5625e-05	5.27344e-05	4.88281e-05
4.88281e-07	1.36719e-05	1.66016e-05	9.27734e-06	4.19922e-05	5.85938e-06	3.71094e-05	9.27734e-06	0.00018457	1.46484e-05	5.85937e-05	4.15039e-05
-1.31836e-05	1.17188e-05	1.75781e-05	8.30078e-06	4.88281e-05	7.8125e-06	-1.26953e-05	8.78906e-06	0.000132813	1.66016e-05	8.78906e-06	4.15039e-05
-1.36719e-05	1.5625e-05	1.5625e-05	8.78906e-06	5.66406e-05	6.5918e-06	-8.78906e-06	1.02539e-05	0.000214844	1.66016e-05	-5.85937e-05	4.39453e-05
-4.88281e-06	1.66016e-05	1.5625e-05	9.76563e-06	6.05469e-05	6.83594e-06	2.44141e-05	1.31836e-05	0.000178711	1.85547e-05	-6.64063e-05	4.88281e-05
5.37109e-06	1.75781e-05	1.5625e-05	8.78906e-06	6.64063e-05	7.08008e-06	4.58984e-05	1.31836e-05	-9.76563e-07	1.75781e-05	-3.80859e-05	3.90625e-05
1.80664e-05	1.95313e-05	1.36719e-05	1.02539e-05	5.37109e-05	6.34766e-06	4.49219e-05	1.07422e-05	-0.000113281	1.75781e-05	-1.95313e-06	3.90625e-05
2.88086e-05	1.95313e-05	1.46484e-05	8.78906e-06	4.29687e-05	3.41797e-06	4.29687e-05	8.30078e-06	-0.00019043	1.36719e-05	0.000158203	3.66211e-05
2.24609e-05	1.66016e-05	1.66016e-05	9.27734e-06	2.83203e-05	2.19727e-06	4.19922e-05	5.37109e-06	-0.000182617	1.85547e-05	0.000167969	3.90625e-05
1.95313e-06	1.46484e-05	1.66016e-05	8.78906e-06	1.26953e-05	4.88281e-07	3.22266e-05	5.37109e-06	-9.57031e-05	1.66016e-05	-2.83203e-05	3.90625e-05
-2.92969e-06	1.46484e-05	1.66016e-05	8.78906e-06	4.88281e-06	-1.2207e-06	4.29687e-05	7.32422e-06	2.92969e-06	1.85547e-05	3.90625e-06	3.90625e-05
2.92969e-05	1.5625e-05	1.66016e-05	7.8125e-06	6.83594e-06	7.32422e-07	9.76563e-05	4.88281e-06	3.32031e-05	1.66016e-05	3.32031e-05	3.66211e-05
8.25195e-05	1.36719e-05	1.46484e-05	6.83594e-06	1.07422e-05	9.76563e-07	9.96094e-05	6.34766e-06	-2.53906e-05	1.75781e-05	-3.61328e-05	4.15039e-05
3.27148e-05	1.46484e-05	1.46484e-05	8.30078e-06	1.85547e-05	-2.44141e-07	4.88281e-06	3.90625e-06	-3.41797e-05	1.75781e-05	-9.17969e-05	4.15039e-05
-7.51953e-05	1.46484e-05	1.26953e-05	7.32422e-06	2.24609e-05	7.32422e-07	-8.98437e-05	4.39453e-06	7.8125e-06	1.95313e-05	-0.000136719	4.39453e-05
-0.000108887	1.5625e-05	2.44141e-05	8.30078e-06	2.92969e-06	-4.88281e-07	-9.96094e-05	7.32422e-06	5.66406e-05	1.66016e-05	-0.000206055	4.15039e-05
-3.22266e-05	1.66016e-05	2.34375e-05	8.78906e-06	-2.83203e-05	1.2207e-06	-5.27344e-05	9.76563e-06	0.000157227	1.85547e-05	-0.000174805	3.90625e-05
2.68555e-05	1.66016e-05	1.85547e-05	8.30078e-06	-2.34375e-05	9.76563e-07	9.76563e-07	5.85938e-06	0.000217773	1.85547e-05	0.000426758	3.66211e-05
3.66211e-05	1.5625e-05	1.17188e-05	9.27734e-06	2.05078e-05	3.41797e-06	0.000108398	6.34766e-06	0.00015625	1.75781e-05	0.000325195	3.90625e-05
3.90625e-05	1.95313e-05	9.76563e-06	7.8125e-06	6.83594e-05	1.70898e-06	0.000111328	4.88281e-06	0.000161133	1.5625e-05	0.000213867	3.41797e-05
2.63672e-05	1.66016e-05	1.17188e-05	8.30078e-06	-3.22266e-05	2.68555e-06	4.98047e-05	8.78906e-06	0.000152344	1.5625e-05	0.000146484	3.41797e-05
2.49023e-05	1.66016e-05	1.66016e-05	7.32422e-06	0.000100586	2.44141e-06	-5.17578e-05	1.02539e-05	0.000131836	1.46484e-05	8.39844e-05	3.41797e-05
1.75781e-05	1.36719e-05	1.75781e-05	6.83594e-06	0.000207031	9.76563e-07	-0.000212891	1.07422e-05	-0.000160156	1.5625e-05	0.000243164	3.41797e-05
2.05078e-05	1.36719e-05	1.75781e-05	6.83594e-06	0.000105469	1.2207e-06	-0.000154297	1.17188e-05	-0.000352539	1.5625e-05	0.000200195	3.41797e-05
2.19727e-05	1.46484e-05	1.5625e-05	8.78906e-06	2.73438e-05	2.44141e-06	1.17188e-05	1.5625e-05	-0.000202148	2.05078e-05	7.22656e-05	4.15039e-05
1.31836e-05	1.5625e-05	1.26953e-05	8.78906e-06	2.92969e-06	2.19727e-06	0.000134766	1.26953e-05	-6.54297e-05	1.66016e-05	-6.73828e-05	4.39453e-05
-2.00195e-05	1.36719e-05	1.26953e-05	8.30078e-06	1.75781e-05	5.12695e-06	0.000162109	9.76563e-06	9.76563e-07	1.85547e-05	-0.000103516	5.85937e-05
-2.92969e-05	1.5625e-05	1.07422e-05	7.32422e-06	9.66797e-05	5.85938e-06	0.000138672	8.30078e-06	0.000150391	1.75781e-05	4.88281e-06	5.85937e-05
3.41797e-06	1.46484e-05	7.8125e-06	7.32422e-06	4.58984e-05	3.90625e-06	7.51953e-05	6.83594e-06	0.000255859	1.5625e-05	-2.83203e-05	5.12695e-05
1.66016e-05	1.5625e-05	1.26953e-05	9.76563e-06	-3.32031e-05	6.10352e-06	3.61328e-05	4.39453e-06	0.000195313	1.5625e-05	-0.000352539	3.66211e-05
1.26953e-05	1.75781e-05	1.36719e-05	9.27734e-06	-8.10547e-05	4.15039e-06	-1.5625e-05	4.39453e-06	0.000144531	1.46484e-05	-0.000485352	3.66211e-05
5.85938e-06	1.66016e-05	1.36719e-05	7.32422e-06	-9.47266e-05	4.39453e-06	-0.000119141	8.30078e-06	8.78906e-05	1.46484e-05	-0.000244141	3.41797e-05
1.17188e-05	1.75781e-05	1.5625e-05	8.78906e-06	-5.17578e-05	3.17383e-06	-0.000133789	8.30078e-06	-1.5625e-05	1.5625e-05	0.000128906	3.41797e-05
8.78906e-06	1.75781e-05	1.5625e-05	9.27734e-06	-1.95313e-05	1.46484e-06	-4.58984e-05	9.76563e-06	7.03125e-05	1.36719e-05	0.000264648	3.17383e-05
5.85938e-06	1.36719e-05	1.75781e-05	9.27734e-06	-1.85547e-05	-1.46484e-06	2.92969e-06	5.37109e-06	2.73438e-05	1.36719e-05	0.000119141	4.15039e-05
1.17188e-05	1.46484e-05	1.66016e-05	6.83594e-06	-9.76563e-06	-7.32422e-07	0.000141602	2.44141e-06	-0.000182617	1.5625e-05	-0.000123047	4.15039e-05
8.78906e-06	1.66016e-05	1.5625e-05	9.27734e-06	2.92969e-05	7.32422e-07	0.000133789	4.39453e-06	-0.000320313	1.85547e-05	-0.000136719	4.15039e-05
1.17188e-05	1.85547e-05	1.66016e-05	8.78906e-06	3.61328e-05	2.68555e-06	7.12891e-05	8.30078e-06	-0.000162109	2.14844e-05	-4.88281e-06	4.15039e-05
1.61133e-05	1.36719e-05	1.5625e-05	7.32422e-06	6.25e-05	4.39453e-06	7.8125e-06	7.8125e-06	-7.71484e-05	2.24609e-05	0.000146484	4.63867e-05
1.36719e-05	1.26953e-05	1.36719e-05	8.78906e-06	4.88281e-05	1.46484e-06	-2.63672e-05	1.07422e-05	-0.000226563	2.05078e-05	9.375e-05	4.15039e-05
1.02539e-05	1.17188e-05	1.66016e-05	8.78906e-06	1.85547e-05	4.15039e-06	2.44141e-05	1.26953e-05	-0.000233398	1.85547e-05	3.90625e-05	4.15039e-05
7.32422e-06	1.5625e-05	1.5625e-05	7.8125e-06	9.76563e-07	4.15039e-06	4.6875e-05	1.2207e-05	-5.85937e-05	1.66016e-05	7.32422e-05	4.39453e-05
7.32422e-06	1.95313e-05	1.26953e-05	8.78906e-06	-9.76563e-07	5.85938e-06	-7.03125e-05	1.41602e-05	0.000380859	1.66016e-05	2.24609e-05	5.12695e-05
8.30078e-06	1.85547e-05	1.46484e-05	9.27734e-06	1.66016e-05	5.12695e-06	-0.000139648	1.12305e-05	0.000631836	1.66016e-05	-8.39844e-05	5.12695e-05
1.36719e-05	1.66016e-05	1.26953e-05	9.27734e-06	2.83203e-05	4.15039e-06	-1.95313e-05	7.32422e-06	0.00043457	1.95313e-05	-0.000146484	4.88281e-05
1.26953e-05	1.75781e-05	1.36719e-05	8.78906e-06	1.36719e-05	4.63867e-06	9.27734e-05	8.78906e-06	0.000121094	1.66016e-05	-7.12891e-05	3.90625e-05
7.8125e-06	1.85547e-05	1.5625e-05	8.78906e-06	-5.85938e-06	5.61523e-06	0.000131836	9.27734e-06	4.88281e-06	1.26953e-05	-9.47266e-05	4.88281e-05
4.88281e-06	1.66016e-05	1.5625e-05	7.8125e-06	1.95313e-06	7.32422e-06	0.000108398	6.83594e-06	-0.000106445	1.17188e-05	-0.000116211	4.39453e-05
8.30078e-06	1.46484e-05	1.5625e-05	8.30078e-06	1.85547e-05	9.52148e-06	6.44531e-05	9.76563e-06	-0.000375977	1.66016e-05	-8.49609e-05	4.39453e-05
1.02539e-05	1.75781e-05	1.66016e-05	8.78906e-06	1.75781e-05	5.85938e-06	4.29687e-05	1.07422e-05	-0.000429688	1.75781e-05	-5.56641e-05	4.15039e-05
1.2207e-05	1.75781e-05	1.75781e-05	8.78906e-06	-3.80859e-05	5.12695e-06	2.53906e-05	1.17188e-05	-0.000390625	2.24609e-05	-2.34375e-05	4.63867e-05
1.31836e-05	1.66016e-05	1.66016e-05	1.02539e-05	-0.000112305	1.95313e-06	4.88281e-06	1.26953e-05	-0.000231445	2.24609e-05	-3.80859e-05	4.39453e-05
1.02539e-05	1.46484e-05	1.66016e-05	9.27734e-06	6.05469e-05	2.92969e-06	4.88281e-06	1.31836e-05	-0.000105469	2.34375e-05	-5.37109e-05	4.39453e-05
1.02539e-05	1.66016e-05	1.36719e-05	8.78906e-06	0.000132813	0	1.5625e-05	9.76563e-06	7.22656e-05	1.75781e-05	-4.49219e-05	3.66211e-05
8.30078e-06	1.85547e-05	1.36719e-05	7.8125e-06	0.000149414	-2.19727e-06	1.46484e-05	9.76563e-06	3.41797e-05	1.75781e-05	-2.24609e-05	4.15039e-05
7.32422e-06	1.66016e-05	1.66016e-05	8.78906e-06	5.85937e-05	1.70898e-06	3.32031e-05	6.34766e-06	-4.98047e-05	2.05078e-05	-2.24609e-05	4.15039e-05
8.30078e-06	1.5625e-05	4.88281e-06	9.76563e-06	-2.92969e-05	4.39453e-06	4.88281e-05	6.34766e-06	5.85938e-06	1.85547e-05	9.76563e-06	4.39453e-05
6.83594e-06	1.85547e-05	1.17188e-05	8.30078e-06	-6.83594e-05	2.68555e-06	2.34375e-05	7.32422e-06	9.96094e-05	1.66016e-05	5.37109e-05	4.15039e-05
4.88281e-06	1.85547e-05	1.75781e-05	6.34766e-06	-4.00391e-05	5.12695e-06	-1.36719e-05	8.30078e-06	0.000260742	1.5625e-05	0.000104492	3.90625e-05
5.85938e-06	1.85547e-05	1.95313e-05	6.34766e-06	-1.07422e-05	4.88281e-06	-1.46484e-05	7.8125e-06	0.000344727	1.46484e-05	9.47266e-05	3.90625e-05
9.27734e-06	1.36719e-05	2.14844e-05	1.02539e-05	-9.96094e-05	5.61523e-06	1.46484e-05	8.78906e-06	0.000162109	1.5625e-05	6.93359e-05	4.15039e-05
6.83594e-06	1.5625e-05	2.05078e-05	1.02539e-05	7.51953e-05	5.37109e-06	0.000132813	7.32422e-06	5.07812e-05	1.85547e-05	7.32422e-05	4.15039e-05
5.37109e-06	1.46484e-05	1.75781e-05	1.02539e-05	0.000305664	5.12695e-06	0.00027832	5.85938e-06	-0.000130859	2.34375e-05	8.39844e-05	4.15039e-05
5.37109e-06	1.66016e-05	1.85547e-05	7.8125e-06	8.00781e-05	3.41797e-06	0.000259766	6.34766e-06	-0.000166016	1.95313e-05	7.71484e-05	3.66211e-05
1.46484e-06	1.66016e-05	1.75781e-05	8.30078e-06	-0.000144531	2.92969e-06	-9.96094e-05	6.83594e-06	-0.000174805	1.75781e-05	9.08203e-05	3.66211e-05
-4.39453e-06	1.46484e-05	2.44141e-05	8.78906e-06	-0.00012207	2.92969e-06	-0.000387695	7.8125e-06	-2.92969e-05	1.66016e-05	9.76563e-05	3.90625e-05
4.88281e-07	1.75781e-05	1.66016e-05	7.32422e-06	1.95313e-06	4.63867e-06	-0.000233398	5.37109e-06	3.51562e-05	1.75781e-05	9.96094e-05	4.15039e-05
4.88281e-07	1.85547e-05	9.76563e-07	7.8125e-06	7.61719e-05	2.92969e-06	-4.88281e-05	8.30078e-06	0.000114258	1.5625e-05	7.61719e-05	4.39453e-05
1.95313e-06	1.95313e-05	8.78906e-06	6.34766e-06	1.07422e-05	-1.95313e-06	-5.37109e-05	8.30078e-06	0.000213867	1.46484e-05	7.42187e-05	4.15039e-05
1.95313e-06	1.75781e-05	1.66016e-05	9.76563e-06	-0.000111328	4.88281e-07	3.22266e-05	8.78906e-06	0.000257813	1.26953e-05	7.61719e-05	3.17383e-05
2.92969e-06	1.5625e-05	2.05078e-05	9.27734e-06	-6.73828e-05	2.92969e-06	0.000110352	6.83594e-06	0.000206055	1.46484e-05	8.69141e-05	3.41797e-05
5.85938e-06	1.5625e-05	1.75781e-05	8.30078e-06	0.000169922	1.70898e-06	7.12891e-05	6.34766e-06	-6.83594e-06	1.46484e-05	8.10547e-05	3.41797e-05
4.39453e-06	1.5625e-05	9.76563e-06	7.32422e-06	0.000183594	1.95313e-06	7.8125e-05	7.8125e-06	-0.000203125	1.66016e-05	5.37109e-05	3.90625e-05
4.39453e-06	1.46484e-05	7.8125e-06	8.30078e-06	-8.39844e-05	2.92969e-06	7.8125e-05	9.76563e-06	-0.000164063	1.46484e-05	3.71094e-05	3.90625e-05
5.85938e-06	1.5625e-05	1.26953e-05	9.76563e-06	-0.000196289	4.63867e-06	9.66797e-05	1.17188e-05	-5.66406e-05	1.75781e-05	4.00391e-05	3.66211e-05
6.83594e-06	1.5625e-05	1.75781e-05	9.27734e-06	-7.8125e-05	4.63867e-06	1.85547e-05	1.26953e-05	6.83594e-06	1.66016e-05	4.00391e-05	3.41797e-05
5.85938e-06	1.5625e-05	1.95313e-05	8.78906e-06	7.61719e-05	5.85938e-06	-2.73438e-05	8.30078e-06	0.000116211	1.66016e-05	7.71484e-05	3.17383e-05
6.34766e-06	1.75781e-05	2.05078e-05	5.85938e-06	8.78906e-05	4.15039e-06	-3.32031e-05	5.85938e-06	0.000117187	1.75781e-05	0.000166016	3.41797e-05
7.32422e-06	1.46484e-05	1.95313e-05	8.30078e-06	7.03125e-05	3.66211e-06	-5.07812e-05	2.92969e-06	0.000123047	1.75781e-05	0.000269531	4.15039e-05
5.85938e-06	1.66016e-05	1.66016e-05	8.78906e-06	3.80859e-05	2.92969e-06	-1.17188e-05	4.39453e-06	0.00019043	1.36719e-05	0.000270508	3.66211e-05
8.30078e-06	1.66016e-05	1.85547e-05	4.88281e-06	9.76563e-06	5.85938e-06	-2.14844e-05	7.8125e-06	0.000192383	1.5625e-05	0.000169922	4.15039e-05
6.34766e-06	1.75781e-05	1.75781e-05	8.78906e-06	-1.75781e-05	6.5918e-06	-3.90625e-05	7.8125e-06	0.000147461	1.36719e-05	1.26953e-05	4.15039e-05
7.8125e-06	1.75781e-05	1.85547e-05	1.17188e-05	-3.51562e-05	6.5918e-06	-4.00391e-05	5.85938e-06	0.000108398	1.46484e-05	-0.000106445	4.88281e-05
6.83594e-06	1.5625e-05	1.66016e-05	9.27734e-06	-2.92969e-05	6.5918e-06	-2.63672e-05	5.85938e-06	5.56641e-05	1.36719e-05	-0.000143555	4.15039e-05
8.30078e-06	1.5625e-05	1.5625e-05	5.37109e-06	9.76563e-07	5.85938e-06	5.07812e-05	5.37109e-06	4.88281e-05	1.75781e-05	-0.000115234	3.66211e-05
6.83594e-06	1.5625e-05	1.95313e-05	4.88281e-06	-6.83594e-06	4.63867e-06	9.76563e-05	4.88281e-06	0.000118164	1.5625e-05	-7.61719e-05	2.92969e-05
8.30078e-06	1.66016e-05	5.85938e-06	5.37109e-06	-1.85547e-05	3.41797e-06	0	6.83594e-06	0.000181641	1.66016e-05	-1.26953e-05	3.41797e-05
8.30078e-06	1.66016e-05	1.17188e-05	5.37109e-06	-2.05078e-05	1.46484e-06	-5.95703e-05	8.78906e-06	0.000237305	1.07422e-05	7.03125e-05	3.41797e-05
9.27734e-06	1.75781e-05	1.66016e-05	1.95313e-05	-9.76563e-06	3.66211e-06	-4.88281e-05	1.07422e-05	0.000170898	1.46484e-05	8.59375e-05	5.61523e-05
9.27734e-06	1.75781e-05	1.36719e-05	1.95313e-05	-4.88281e-06	4.39453e-06	-1.17188e-05	8.30078e-06	3.61328e-05	1.5625e-05	5.76172e-05	5.37109e-05
9.76563e-06	1.5625e-05	1.07422e-05	1.12305e-05	-1.95313e-06	3.90625e-06	1.17188e-05	9.76563e-06	-7.03125e-05	1.75781e-05	0.000104492	4.88281e-05
9.27734e-06	1.26953e-05	2.92969e-06	6.83594e-06	2.14844e-05	4.39453e-06	-3.90625e-06	8.78906e-06	-0.000119141	1.5625e-05	0.000128906	3.66211e-05
8.78906e-06	1.46484e-05	5.85938e-06	2.92969e-06	3.22266e-05	3.90625e-06	1.75781e-05	1.02539e-05	9.76563e-06	1.66016e-05	9.76563e-05	3.41797e-05
9.76563e-06	1.66016e-05	1.46484e-05	1.95313e-06	3.22266e-05	2.92969e-06	4.29687e-05	9.76563e-06	-5.27344e-05	1.75781e-05	1.17188e-05	3.90625e-05
8.30078e-06	1.5625e-05	2.14844e-05	4.39453e-06	2.83203e-05	4.15039e-06	5.27344e-05	1.17188e-05	-7.91016e-05	1.95313e-05	-0.000166992	4.63867e-05
9.27734e-06	1.5625e-05	2.44141e-05	1.02539e-05	2.92969e-05	2.44141e-06	3.32031e-05	8.78906e-06	-3.71094e-05	1.75781e-05	-0.00015332	4.15039e-05
1.07422e-05	1.66016e-05	2.53906e-05	1.07422e-05	2.83203e-05	4.39453e-06	4.10156e-05	1.07422e-05	1.17188e-05	1.75781e-05	0.000111328	4.15039e-05
1.07422e-05	1.75781e-05	1.95313e-05	1.26953e-05	2.83203e-05	5.12695e-06	0.000114258	1.02539e-05	3.80859e-05	1.66016e-05	0.000125	3.66211e-05
1.02539e-05	1.5625e-05	1.17188e-05	8.78906e-06	3.22266e-05	4.63867e-06	0.000137695	8.78906e-06	2.73438e-05	1.66016e-05	7.71484e-05	4.15039e-05
8.78906e-06	1.66016e-05	8.78906e-06	6.83594e-06	3.22266e-05	3.90625e-06	9.86328e-05	6.83594e-06	1.26953e-05	1.46484e-05	5.85938e-06	4.15039e-05
7.32422e-06	1.66016e-05	2.73438e-05	4.88281e-06	4.6875e-05	3.41797e-06	3.125e-05	6.34766e-06	6.83594e-06	1.66016e-05	5.07812e-05	3.90625e-05
6.83594e-06	1.85547e-05	4.98047e-05	-1.95313e-06	5.27344e-05	7.32422e-07	-3.61328e-05	8.78906e-06	-4.88281e-06	1.66016e-05	5.95703e-05	3.90625e-05
8.78906e-06	1.5625e-05	4.98047e-05	-1.46484e-06	2.24609e-05	4.88281e-07	-7.51953e-05	7.8125e-06	-1.75781e-05	1.75781e-05	-3.22266e-05	4.63867e-05
9.27734e-06	1.66016e-05	2.92969e-05	9.76563e-07	-1.95313e-06	2.44141e-06	-4.78516e-05	7.8125e-06	-9.76563e-06	1.5625e-05	-0.000119141	4.63867e-05
1.07422e-05	1.5625e-05	1.07422e-05	1.36719e-05	8.78906e-06	6.34766e-06	1.66016e-05	8.30078e-06	-2.83203e-05	1.66016e-05	-0.00015332	5.12695e-05
1.07422e-05	1.66016e-05	5.85938e-06	2.00195e-05	3.41797e-05	5.61523e-06	3.90625e-05	5.85938e-06	-5.07812e-05	1.85547e-05	-0.000165039	4.63867e-05
9.27734e-06	1.85547e-05	-1.66016e-05	1.66016e-05	5.46875e-05	5.12695e-06	1.66016e-05	3.90625e-06	-5.66406e-05	1.85547e-05	-0.000125	4.39453e-05
9.76563e-06	1.66016e-05	-1.66016e-05	7.8125e-06	6.64063e-05	2.44141e-06	-9.76563e-06	3.41797e-06	-5.76172e-05	1.5625e-05	-3.71094e-05	3.90625e-05
1.02539e-05	1.46484e-05	2.53906e-05	0	6.73828e-05	2.44141e-06	-1.66016e-05	5.85938e-06	-5.46875e-05	2.05078e-05	6.73828e-05	4.63867e-05
9.27734e-06	1.66016e-05	3.51562e-05	3.41797e-06	6.44531e-05	2.44141e-06	8.59375e-05	8.78906e-06	-5.56641e-05	1.66016e-05	6.15234e-05	3.90625e-05
7.8125e-06	1.66016e-05	-5.85937e-05	5.85938e-06	5.37109e-05	1.2207e-06	5.85937e-05	9.76563e-06	-4.98047e-05	1.95313e-05	-5.66406e-05	3.90625e-05
7.32422e-06	1.75781e-05	-7.42187e-05	4.88281e-06	2.05078e-05	1.46484e-06	-8.49609e-05	9.27734e-06	-4.78516e-05	1.85547e-05	0.000144531	3.66211e-05
6.83594e-06	1.36719e-05	1.26953e-05	3.90625e-06	-3.90625e-06	3.17383e-06	-3.90625e-05	1.26953e-05	-4.39453e-05	1.95313e-05	0.000338867	4.39453e-05
8.78906e-06	1.36719e-05	0.000112305	1.31836e-05	2.24609e-05	1.95313e-06	7.8125e-06	1.17188e-05	-3.90625e-05	1.75781e-05	4.19922e-05	4.39453e-05
1.07422e-05	1.5625e-05	0.000149414	1.46484e-05	3.02734e-05	3.17383e-06	5.85937e-05	9.27734e-06	-2.83203e-05	1.85547e-05	-0.000145508	4.88281e-05
9.76563e-06	1.66016e-05	0.000148437	1.12305e-05	3.32031e-05	2.19727e-06	7.42187e-05	1.07422e-05	-1.85547e-05	1.75781e-05	-0.000226563	4.15039e-05
8.30078e-06	1.66016e-05	7.22656e-05	1.17188e-05	3.02734e-05	1.46484e-06	2.83203e-05	1.17188e-05	-1.46484e-05	1.85547e-05	-1.17188e-05	4.15039e-05
7.32422e-06	1.66016e-05	-2.83203e-05	9.27734e-06	3.125e-05	2.68555e-06	4.00391e-05	1.07422e-05	-6.83594e-06	1.66016e-05	0.000163086	3.66211e-05
7.32422e-06	1.75781e-05	-2.24609e-05	6.34766e-06	3.32031e-05	2.44141e-06	6.73828e-05	6.34766e-06	-3.90625e-06	1.85547e-05	0.000128906	3.41797e-05
8.78906e-06	1.46484e-05	-8.78906e-06	7.8125e-06	3.61328e-05	2.44141e-06	0.000107422	2.44141e-06	-3.90625e-06	1.85547e-05	-4.6875e-05	3.41797e-05
1.17188e-05	1.75781e-05	-1.66016e-05	8.30078e-06	3.90625e-05	4.39453e-06	2.92969e-06	2.92969e-06	-5.85938e-06	1.75781e-05	-0.000121094	3.90625e-05
1.17188e-05	1.46484e-05	-3.32031e-05	1.2207e-05	3.41797e-05	6.83594e-06	8.78906e-06	3.90625e-06	-6.83594e-06	1.85547e-05	-0.000131836	3.90625e-05
9.27734e-06	1.5625e-05	-1.26953e-05	8.78906e-06	2.83203e-05	4.88281e-06	2.14844e-05	4.88281e-06	0	1.5625e-05	-6.34766e-05	4.39453e-05
8.30078e-06	1.66016e-05	1.66016e-05	8.30078e-06	1.17188e-05	3.41797e-06	-5.37109e-05	7.32422e-06	1.17188e-05	1.5625e-05	-0.000141602	4.63867e-05
8.30078e-06	1.75781e-05	3.22266e-05	6.34766e-06	3.32031e-05	-4.88281e-07	-7.12891e-05	9.76563e-06	1.66016e-05	1.66016e-05	-0.00021582	5.37109e-05
6.83594e-06	1.66016e-05	2.24609e-05	3.41797e-06	5.95703e-05	-7.32422e-07	-6.05469e-05	6.34766e-06	6.83594e-06	1.66016e-05	-2.05078e-05	5.12695e-05
8.78906e-06	1.75781e-05	5.85938e-06	-2.92969e-06	0.000100586	7.32422e-07	-5.07812e-05	7.32422e-06	1.36719e-05	1.95313e-05	-1.07422e-05	4.39453e-05
8.30078e-06	1.75781e-05	3.90625e-06	-9.76563e-06	5.85937e-05	1.95313e-06	-2.24609e-05	6.83594e-06	1.17188e-05	1.75781e-05	0.000373047	3.17383e-05
6.83594e-06	1.5625e-05	2.44141e-05	4.88281e-07	4.49219e-05	1.2207e-06	-3.32031e-05	7.8125e-06	1.46484e-05	1.95313e-05	0.000771484	3.17383e-05
9.27734e-06	1.5625e-05	5.17578e-05	1.36719e-05	5.27344e-05	2.44141e-06	-1.36719e-05	7.8125e-06	2.53906e-05	2.05078e-05	0.000202148	3.41797e-05
8.30078e-06	1.5625e-05	2.83203e-05	1.85547e-05	8.88672e-05	2.68555e-06	3.90625e-06	8.78906e-06	3.125e-05	1.85547e-05	-0.00028418	3.41797e-05
7.32422e-06	1.66016e-05	2.63672e-05	3.80859e-05	-6.73828e-05	2.19727e-06	1.85547e-05	9.76563e-06	3.32031e-05	1.46484e-05	-0.000271484	3.41797e-05
9.27734e-06	1.66016e-05	-1.07422e-05	3.90625e-05	-0.000229492	2.19727e-06	5.66406e-05	1.41602e-05	3.41797e-05	1.5625e-05	6.15234e-05	4.15039e-05
7.8125e-06	1.66016e-05	-4.88281e-06	2.19727e-05	-0.000211914	5.85938e-06	9.96094e-05	1.31836e-05	3.02734e-05	1.66016e-05	-2.83203e-05	4.15039e-05
7.32422e-06	1.5625e-05	9.76563e-07	2.05078e-05	-9.96094e-05	5.85938e-06	6.25e-05	1.2207e-05	2.92969e-05	1.75781e-05	-0.000193359	4.15039e-05
1.02539e-05	1.66016e-05	1.26953e-05	2.53906e-05	-1.46484e-05	5.37109e-06	8.69141e-05	9.27734e-06	2.73438e-05	1.5625e-05	-5.85938e-06	3.90625e-05
1.07422e-05	1.5625e-05	2.14844e-05	9.76563e-06	-3.90625e-05	5.37109e-06	3.32031e-05	8.30078e-06	2.83203e-05	1.85547e-05	7.22656e-05	4.15039e-05
1.2207e-05	1.66016e-05	1.46484e-05	-5.85938e-06	0.000188477	4.63867e-06	-2.92969e-06	9.76563e-06	4.88281e-06	1.75781e-05	7.22656e-05	4.63867e-05
1.2207e-05	1.66016e-05	8.78906e-06	-1.02539e-05	0.000318359	4.88281e-06	-3.51562e-05	8.30078e-06	-1.36719e-05	1.75781e-05	9.17969e-05	5.12695e-05
1.02539e-05	1.5625e-05	5.85938e-06	1.95313e-06	0.000268555	1.2207e-06	-1.95313e-06	6.83594e-06	-3.90625e-06	1.5625e-05	4.78516e-05	4.88281e-05
4.88281e-06	1.5625e-05	1.07422e-05	5.85938e-06	8.59375e-05	1.46484e-06	3.51562e-05	8.78906e-06	9.76563e-06	1.5625e-05	-8.78906e-05	5.12695e-05
-3.41797e-06	1.85547e-05	1.66016e-05	1.07422e-05	-0.000105469	1.2207e-06	3.61328e-05	9.76563e-06	0.000178711	1.46484e-05	-0.00012793	4.63867e-05
4.88281e-07	1.85547e-05	1.17188e-05	1.26953e-05	-0.000201172	3.90625e-06	5.37109e-05	8.78906e-06	0.000349609	1.66016e-05	-3.61328e-05	4.39453e-05
1.66016e-05	1.5625e-05	-2.92969e-06	9.76563e-06	-0.000194336	4.39453e-06	8.00781e-05	9.27734e-06	0.000352539	1.36719e-05	-0.000125	4.15039e-05
3.36914e-05	1.75781e-05	-9.76563e-07	8.30078e-06	-4.49219e-05	5.61523e-06	4.78516e-05	7.8125e-06	8.10547e-05	1.5625e-05	-0.000172852	4.63867e-05
3.07617e-05	1.5625e-05	3.90625e-06	9.27734e-06	4.49219e-05	5.85938e-06	1.66016e-05	1.02539e-05	-0.000146484	1.5625e-05	-0.000206055	3.90625e-05
-1.12305e-05	1.5625e-05	5.85938e-06	1.07422e-05	6.25e-05	7.32422e-06	-4.88281e-05	9.76563e-06	-0.000474609	1.85547e-05	3.51562e-05	3.90625e-05
-4.05273e-05	1.36719e-05	4.88281e-06	1.31836e-05	3.22266e-05	6.34766e-06	-0.000114258	8.78906e-06	-0.000925781	1.66016e-05	0.000137695	3.66211e-05
-3.22266e-05	1.36719e-05	5.85938e-06	1.02539e-05	0.000175781	4.63867e-06	-1.36719e-05	1.07422e-05	-0.000670898	1.85547e-05	0.000104492	3.66211e-05
-2.24609e-05	1.46484e-05	9.76563e-06	9.27734e-06	9.17969e-05	5.12695e-06	-4.00391e-05	8.78906e-06	-8.59375e-05	1.95313e-05	9.96094e-05	3.41797e-05
-2.53906e-05	1.66016e-05	1.07422e-05	8.78906e-06	-0.000157227	5.85938e-06	8.78906e-06	9.76563e-06	0.000137695	2.14844e-05	0.000113281	3.90625e-05
-1.2207e-05	1.85547e-05	9.76563e-06	1.12305e-05	-0.000205078	3.66211e-06	0.000134766	9.27734e-06	0.000270508	1.75781e-05	0.000100586	4.39453e-05
3.17383e-05	1.85547e-05	1.07422e-05	9.76563e-06	-0.000189453	5.61523e-06	0.000172852	9.76563e-06	0.000410156	1.66016e-05	0.000116211	5.12695e-05
4.39453e-05	1.85547e-05	1.07422e-05	8.30078e-06	0.000131836	6.10352e-06	0.000132813	9.76563e-06	0.000548828	1.46484e-05	1.95313e-06	4.88281e-05
3.61328e-05	1.66016e-05	9.76563e-06	4.88281e-06	0.00025293	4.63867e-06	8.00781e-05	1.02539e-05	0.000550781	1.46484e-05	-5.76172e-05	4.88281e-05
2.83203e-05	1.66016e-05	1.5625e-05	5.37109e-06	1.36719e-05	3.17383e-06	3.90625e-05	9.76563e-06	0.00052832	1.26953e-05	-0.000162109	4.88281e-05
2.09961e-05	1.5625e-05	2.05078e-05	1.95313e-06	-2.34375e-05	3.17383e-06	1.95313e-05	9.76563e-06	0.000482422	1.36719e-05	-0.000158203	4.88281e-05
2.63672e-05	9.76563e-06	2.24609e-05	5.85938e-06	4.88281e-05	3.41797e-06	7.8125e-06	9.27734e-06	0.00012207	1.36719e-05	-0.000101562	4.63867e-05
1.9043e-05	1.07422e-05	2.24609e-05	6.34766e-06	4.88281e-06	4.63867e-06	1.5625e-05	8.78906e-06	-6.34766e-05	1.5625e-05	-2.83203e-05	3.90625e-05
-1.12305e-05	1.26953e-05	2.24609e-05	5.37109e-06	-9.27734e-05	7.08008e-06	4.29687e-05	1.07422e-05	-0.000385742	1.46484e-05	3.71094e-05	3.66211e-05
-2.68555e-05	1.75781e-05	2.05078e-05	3.41797e-06	-7.8125e-05	8.05664e-06	3.71094e-05	9.27734e-06	-0.000454102	1.85547e-05	5.37109e-05	4.15039e-05
-4.6875e-05	2.14844e-05	2.05078e-05	3.41797e-06	-7.12891e-05	6.83594e-06	6.83594e-06	7.8125e-06	-0.000430664	2.05078e-05	3.22266e-05	3.90625e-05
-5.85937e-05	1.95313e-05	1.95313e-05	5.37109e-06	5.46875e-05	5.85938e-06	1.17188e-05	5.85938e-06	-0.000350586	1.95313e-05	7.71484e-05	4.39453e-05
-4.63867e-05	1.85547e-05	1.85547e-05	2.92969e-06	-5.17578e-05	1.95313e-06	2.63672e-05	7.32422e-06	-0.000289062	1.85547e-05	5.76172e-05	3.90625e-05
-2.29492e-05	1.66016e-05	1.95313e-05	5.37109e-06	6.64063e-05	-1.46484e-06	0.000119141	8.30078e-06	-0.000111328	2.34375e-05	2.44141e-05	3.90625e-05
1.80664e-05	1.66016e-05	2.44141e-05	3.41797e-06	0.000248047	9.76563e-07	8.20313e-05	4.39453e-06	8.39844e-05	2.34375e-05	-5.85938e-06	3.66211e-05
6.20117e-05	1.66016e-05	2.44141e-05	3.41797e-06	0.000239258	1.70898e-06	-0.000213867	4.88281e-07	0.000308594	2.05078e-05	-5.95703e-05	4.15039e-05
9.42383e-05	1.66016e-05	2.24609e-05	5.37109e-06	-8.59375e-05	4.63867e-06	-0.000265625	1.46484e-06	0.000174805	1.75781e-05	-4.10156e-05	3.90625e-05
0.00010498	1.75781e-05	2.24609e-05	5.37109e-06	-0.000277344	2.44141e-06	-0.000199219	3.41797e-06	5.76172e-05	2.05078e-05	2.83203e-05	5.12695e-05
8.83789e-05	1.26953e-05	2.24609e-05	5.37109e-06	-0.000177734	2.92969e-06	-1.46484e-05	4.88281e-06	6.54297e-05	1.5625e-05	9.08203e-05	4.88281e-05
6.88477e-05	4.88281e-06	1.95313e-05	7.32422e-06	-2.63672e-05	4.15039e-06	0.000212891	5.85938e-06	0.000130859	1.46484e-05	9.08203e-05	4.63867e-05
2.73438e-05	5.85938e-06	2.05078e-05	6.83594e-06	6.34766e-05	2.92969e-06	0.000266602	8.30078e-06	0.000222656	1.36719e-05	4.10156e-05	3.41797e-05
-5.0293e-05	9.76563e-06	1.95313e-05	5.85938e-06	7.03125e-05	6.34766e-06	0.000182617	1.07422e-05	0.000227539	1.5625e-05	0.000123047	3.66211e-05
-5.32227e-05	1.36719e-05	2.05078e-05	5.37109e-06	3.61328e-05	7.08008e-06	7.22656e-05	1.31836e-05	0.000181641	1.46484e-05	0.000162109	2.68555e-05
-3.51562e-05	1.85547e-05	1.95313e-05	4.39453e-06	1.17188e-05	7.08008e-06	-1.85547e-05	1.26953e-05	0.000186523	1.5625e-05	0.000104492	3.41797e-05
-3.51562e-05	1.95313e-05	2.14844e-05	6.34766e-06	5.85937e-05	6.83594e-06	-3.32031e-05	9.76563e-06	0.000125977	1.75781e-05	7.51953e-05	4.15039e-05
-1.61133e-05	1.95313e-05	2.05078e-05	5.37109e-06	9.86328e-05	9.76563e-06	3.90625e-06	1.12305e-05	3.71094e-05	1.46484e-05	6.34766e-05	4.39453e-05
5.37109e-06	1.95313e-05	2.05078e-05	6.34766e-06	8.78906e-05	7.32422e-06	3.90625e-06	1.17188e-05	-1.75781e-05	1.36719e-05	6.44531e-05	4.15039e-05
3.56445e-05	1.75781e-05	1.95313e-05	8.30078e-06	5.66406e-05	6.5918e-06	-1.85547e-05	1.36719e-05	-2.63672e-05	1.85547e-05	6.44531e-05	3.66211e-05
8.05664e-05	1.75781e-05	2.05078e-05	7.8125e-06	3.41797e-05	2.68555e-06	-3.71094e-05	1.51367e-05	-9.76563e-05	1.85547e-05	6.73828e-05	3.66211e-05
0.000110352	1.75781e-05	2.73438e-05	6.83594e-06	1.26953e-05	-7.32422e-07	-5.56641e-05	1.07422e-05	-5.37109e-05	2.05078e-05	8.98437e-05	3.66211e-05
7.95898e-05	1.5625e-05	3.41797e-05	6.34766e-06	1.75781e-05	-3.66211e-06	-0.000100586	4.88281e-06	-3.90625e-05	1.66016e-05	7.22656e-05	3.66211e-05
1.80664e-05	1.46484e-05	1.66016e-05	7.8125e-06	4.19922e-05	-2.68555e-06	-1.95313e-05	-1.46484e-06	-1.26953e-05	1.66016e-05	3.02734e-05	3.90625e-05
-7.8125e-06	1.36719e-05	5.85938e-06	1.07422e-05	6.34766e-05	-1.46484e-06	7.42187e-05	-2.92969e-06	-0.000146484	1.5625e-05	-1.36719e-05	4.15039e-05
-1.17188e-05	1.36719e-05	7.8125e-06	1.2207e-05	5.76172e-05	4.88281e-07	4.19922e-05	9.76563e-07	-8.00781e-05	1.85547e-05	-3.22266e-05	4.39453e-05
-6.34766e-06	1.46484e-05	8.78906e-06	1.07422e-05	2.24609e-05	3.41797e-06	-7.51953e-05	3.90625e-06	1.95313e-05	1.85547e-05	0.000124023	3.66211e-05
1.95313e-06	1.66016e-05	1.46484e-05	9.27734e-06	-1.5625e-05	1.70898e-06	-0.000267578	4.88281e-06	6.15234e-05	1.75781e-05	0.000352539	3.66211e-05
6.34766e-06	1.95313e-05	1.75781e-05	1.07422e-05	-3.90625e-05	4.88281e-07	-0.000189453	8.78906e-06	0.000104492	1.5625e-05	0.000263672	3.17383e-05
1.17188e-05	2.24609e-05	2.05078e-05	9.76563e-06	-7.8125e-06	2.92969e-06	-9.76563e-07	1.02539e-05	7.51953e-05	1.66016e-05	-3.22266e-05	3.41797e-05
1.46484e-05	1.95313e-05	2.14844e-05	8.30078e-06	8.00781e-05	2.92969e-06	0.000130859	1.46484e-05	3.22266e-05	1.26953e-05	-5.07812e-05	3.41797e-05
1.2207e-05	1.46484e-05	1.95313e-05	8.30078e-06	0.00015332	4.15039e-06	0.000138672	1.12305e-05	3.90625e-06	1.46484e-05	-5.07812e-05	4.88281e-05
8.30078e-06	1.5625e-05	1.95313e-05	9.76563e-06	9.47266e-05	3.41797e-06	0.000101562	1.2207e-05	-2.63672e-05	1.17188e-05	2.14844e-05	4.39453e-05
4.88281e-06	1.5625e-05	1.95313e-05	9.27734e-06	-1.46484e-05	4.63867e-06	5.56641e-05	1.26953e-05	6.44531e-05	1.26953e-05	-7.61719e-05	4.15039e-05
2.44141e-06	1.5625e-05	1.75781e-05	1.02539e-05	-8.59375e-05	7.32422e-07	4.88281e-05	1.02539e-05	0.000158203	1.46484e-05	-0.000241211	3.90625e-05
5.37109e-06	1.75781e-05	1.46484e-05	1.07422e-05	-6.34766e-05	1.2207e-06	-2.92969e-06	1.12305e-05	0.000242187	1.66016e-05	-0.000199219	3.90625e-05
3.90625e-06	1.66016e-05	1.46484e-05	1.07422e-05	7.22656e-05	3.90625e-06	-6.93359e-05	9.76563e-06	0.00019043	1.5625e-05	-7.03125e-05	4.15039e-05
2.44141e-06	1.75781e-05	1.75781e-05	1.02539e-05	0.000114258	3.41797e-06	-6.25e-05	9.27734e-06	6.64063e-05	1.85547e-05	-1.66016e-05	4.39453e-05
1.46484e-06	1.95313e-05	1.46484e-05	9.27734e-06	2.63672e-05	1.46484e-06	-5.85938e-06	5.85938e-06	-5.85937e-05	1.46484e-05	1.75781e-05	4.15039e-05
-3.41797e-06	2.14844e-05	1.26953e-05	8.78906e-06	-6.73828e-05	2.92969e-06	2.24609e-05	6.34766e-06	-0.000137695	1.75781e-05	-2.14844e-05	4.88281e-05
-4.88281e-06	1.75781e-05	1.26953e-05	8.78906e-06	-1.85547e-05	3.41797e-06	0.000160156	7.32422e-06	4.49219e-05	1.5625e-05	0.000119141	3.90625e-05
-4.39453e-06	1.46484e-05	1.07422e-05	9.76563e-06	4.29687e-05	1.46484e-06	4.98047e-05	1.2207e-05	-2.92969e-06	1.5625e-05	0.000235352	3.41797e-05
-9.76563e-06	1.75781e-05	1.07422e-05	8.30078e-06	0.000140625	1.46484e-06	-8.39844e-05	1.17188e-05	-6.64063e-05	1.75781e-05	0.000261719	3.41797e-05
-1.26953e-05	1.75781e-05	1.36719e-05	9.76563e-06	0.000167969	0	-0.000101562	1.02539e-05	-7.42187e-05	1.85547e-05	0.000211914	3.17383e-05
-1.12305e-05	1.66016e-05	1.75781e-05	9.76563e-06	2.44141e-05	1.70898e-06	-4.49219e-05	8.78906e-06	7.91016e-05	1.46484e-05	0.000124023	4.15039e-05
-1.02539e-05	1.75781e-05	2.14844e-05	1.07422e-05	-7.8125e-05	2.44141e-06	1.36719e-05	1.17188e-05	0.000148437	1.36719e-05	-5.76172e-05	5.12695e-05
-1.2207e-05	1.66016e-05	1.75781e-05	9.27734e-06	-2.05078e-05	1.2207e-06	9.47266e-05	9.76563e-06	-1.66016e-05	1.36719e-05	-4.29687e-05	4.63867e-05
-1.17188e-05	1.66016e-05	1.5625e-05	9.27734e-06	3.80859e-05	3.66211e-06	9.17969e-05	9.27734e-06	-9.57031e-05	1.66016e-05	-0.000113281	4.39453e-05
-9.76563e-06	1.75781e-05	1.66016e-05	6.83594e-06	1.46484e-05	2.19727e-06	4.88281e-06	7.32422e-06	-0.000107422	1.5625e-05	-0.000121094	3.90625e-05
-9.27734e-06	1.75781e-05	1.46484e-05	1.02539e-05	-3.90625e-05	5.12695e-06	5.46875e-05	7.8125e-06	-0.000167969	1.85547e-05	-0.000135742	4.88281e-05
-6.83594e-06	1.75781e-05	1.5625e-05	1.02539e-05	-4.49219e-05	3.66211e-06	0.00012793	5.85938e-06	-0.000201172	1.85547e-05	-0.000132813	4.39453e-05
-5.85938e-06	1.75781e-05	1.5625e-05	9.76563e-06	-1.46484e-05	2.19727e-06	0.000106445	6.34766e-06	-0.000115234	2.34375e-05	-0.000101562	4.15039e-05
-5.85938e-06	1.75781e-05	1.5625e-05	7.32422e-06	8.78906e-06	2.92969e-06	5.07812e-05	4.88281e-06	-5.17578e-05	2.14844e-05	-0.000133789	3.90625e-05
-4.88281e-06	1.66016e-05	1.46484e-05	8.78906e-06	9.76563e-06	3.41797e-06	3.41797e-05	7.8125e-06	-3.61328e-05	2.14844e-05	8.98437e-05	4.15039e-05
-1.46484e-06	1.5625e-05	1.36719e-05	8.78906e-06	9.76563e-07	3.41797e-06	-1.17188e-05	7.8125e-06	-0.000108398	1.85547e-05	0.000385742	3.90625e-05
0	1.66016e-05	1.46484e-05	9.76563e-06	-8.78906e-06	2.68555e-06	-1.36719e-05	4.39453e-06	-6.83594e-05	1.5625e-05	0.000222656	4.15039e-05
[truncated: 29,112 more rows]

## Sheet: Figure 3-source data
Figure 3A
		No perineal stimulation (NPS)						With perineal stimulation (PS)
		W1	W2	W3	W4	W5	W6	W1	W2	W3	W4	W5	W6
Group 1	Cat 1	/	/	/	/	/	8	/	/	/	/	/	8
	Cat 2	/	/	/	/	/	8	/	/	/	/	/	8
	Cat 3	3	5	7	7	8	8	6	8	8	7	8	8
	Cat 4	1	4	3	3	3	3	5	6	5	5	6	6
Group 2	Cat 5	2	1	5	3	7	8	2	5	8	8	7	8
	Cat 6	0	6	7	8	8	8	1	8	7	8	8	8
	Cat 7	0	0	0	0	1	1	0	1	3	4	4	4
	Cat 8	0	0	0	1	1	1	0	1	3	4	4	4
Group 3	Cat 9	0	2	1	7	7	8	3	6	6	8	8	8
	Cat 10	0	6	5	8	8	6	2	6	5	8	8	6
	Cat 11	0	0	1	3	3	4	3	5	4	5	5	8
	Cat 12	/	/	/	/	/	8	/	/	/	/	/	8

## Sheet: Figure 4-source data
Figure 4B
		Cycle duration (s)		Stance duration (s)		Swing duration (s)		Phasing
		NPS	PS	NPS	PS	NPS	PS	NPS	PS
	Cat 1	0.729667	0.672727	0.427778	0.35	0.301889	0.322727	0.572016	0.553529
	Cat 2	0.9165	0.6433	0.5585	0.4584	0.358	0.1849	0.537034	0.465769
	Cat 3	0.711111	0.602286	0.420444	0.366714	0.290667	0.235571	0.590906	0.621737
	Cat 4	0.489364	0.653778	0.312	0.413	0.177364	0.240778	0.536996	0.466201
	Cat 5	0.973	0.846429	0.533125	0.503643	0.439875	0.342786	0.574696	0.5589
	Cat 6	0.7617	0.669333	0.4216	0.377833	0.3401	0.2915	0.594087	0.619792
	Cat 7	/	/	/	/	/	/	/	/
	Cat 8	/	/	/	/	/	/	/	/
	Cat 9	0.782143	0.663636	0.552429	0.407636	0.229714	0.256	0.472368	0.536863
	Cat 10	0.875	0.765	0.5184	0.5118	0.3566	0.2532	0.475703	0.317503
	Cat 11	0.55	0.7	0.40825	0.4683	0.14175	0.2317	0.543589	0.509515
	Cat 12	0.927667	0.879462	0.589333	0.555154	0.338667	0.324308	0.581188	0.450125
Figure 4C
		TS burst duration (s)		TS amplitude (% of intact)			SRT duration (s)		SRT amplitude (% of intact)				TS = triceps surae
		NPS	PS	INTACT	NPS	PS	NPS	PS	INTACT	NPS	PS		SRT = anterior sartorius
	Cat 1	0.372222	0.297333	13.2945	16.6647	16.9037	0.281	0.195889	73.4682	63.6212	72.1458
	Cat 2	0.579333	0.3887	202.053	170.484	231.365	0.184778	0.117	18.8236	18.1993	33.8118
	Cat 3	0.29775	0.274429	162.589	102.923	109.64	0.163444	0.1435	77.8602	65.1328	68.9377
	Cat 4	0.308545	0.442667	98.6963	141.035	179.448	/	/	/	/	/
	Cat 5	0.457625	0.454071	185.021	190.725	236.537	0.178375	0.149786	66.8241	25.6231	32.5022
	Cat 6	0.3973	0.377833	151.043	88.3402	89.7468	0.0388	0.0556667	39.6111	42.3385	26.0998
	Cat 7	/	/	/	/	/	/	/	/	/	/
	Cat 8	/	/	/	/	/	/	/	/	/	/
	Cat 9	0.374929	0.374636	198.416	105.758	133.608	0.0783077	0.102167	62.6493	50.9673	72.1967
	Cat 10	0.388364	0.4209	95.3586	101.352	123.02	0.278	0.231857	50.5829	77.8098	61.6472
	Cat 11	0.2582	0.4045	143.594	82.0125	158.798	/	/	/	/	/
	Cat 12	0.499667	0.505429	23.8515	10.5339	22.9571	/	/	/	/	/
Figure 4A
Cat 3												Cat 6												Cat 7												Cat 9
Intact 0,4 m/s				W6 0,4 m/s Without perineal stimulation				W6 0,4 m/s With perineal stimulation				Intact 0,4 m/s				W6 0,4 m/s Without perineal stimulation				W6 0,4 m/s With perineal stimulation				Intact 0,4 m/s				W6 0,4 m/s Without perineal stimulation				W6 0,4 m/s With perineal stimulation				Intact 0,4 m/s				W6 0,4 m/s Without perineal stimulation				W6 0,4 m/s With perineal stimulation
RVL	RSRT	LVL	LSRT	RVL	RSRT	LVL	LSRT	RVL	RSRT	LVL	LSRT	RSOL	RSRT	LSOL	LSRT	RSOL	RSRT	LSOL	LSRT	RSOL	RSRT	LSOL	LSRT	RSOL	RSRT	LSOL	LSRT	RSOL	RSRT	LSOL	LSRT	RSOL	RSRT	LSOL	LSRT	RBFA	RSRT	LBFA	LSRT	RBFA	RSRT	LBFA	LSRT	RBFA	RSRT	LBFA	LSRT
-4.29687e-05	-2.44141e-06	-2.44141e-06	-2.92969e-06	-0.00013916	-7.32422e-06	-2.92969e-06	-9.0332e-06	-1.2207e-05	2.44141e-06	-0.000193359	1.46484e-06	0.000135742	4.39453e-05	1.85547e-05	1.02539e-05	1.75781e-05	9.76563e-06	1.95313e-05	1.17188e-05	1.75781e-05	9.76563e-06	1.95313e-05	1.17188e-05	6.88477e-05	2.73438e-05	6.34766e-05	2.97852e-05	2.68555e-05	1.66016e-05	3.125e-05	1.5625e-05	8.78906e-06	-1.36719e-05	2.44141e-05	1.75781e-05	7.32422e-06	2.73438e-05	1.95313e-06	2.14844e-05	-2.88086e-05	8.39844e-05	-1.61133e-05	-6.83594e-06	-1.07422e-05	0.000150391	2.97852e-05	-0.000117187
3.90625e-06	-5.37109e-06	-4.88281e-06	-6.34766e-06	8.78906e-05	2.44141e-06	9.76563e-06	2.24609e-05	-7.32422e-06	-7.32422e-06	-2.92969e-06	-1.70898e-06	-0.000164063	-4.19922e-05	1.36719e-05	5.37109e-06	1.36719e-05	6.83594e-06	1.36719e-05	8.78906e-06	1.36719e-05	6.83594e-06	1.36719e-05	8.78906e-06	4.49219e-05	1.75781e-05	5.37109e-05	2.68555e-05	1.66016e-05	1.85547e-05	3.02734e-05	1.66016e-05	7.8125e-06	0.000171875	1.95313e-05	1.66016e-05	9.27734e-06	2.34375e-05	-9.76563e-07	8.78906e-06	-2.14844e-05	8.00781e-05	-1.66016e-05	-1.36719e-05	2.44141e-06	3.80859e-05	8.20313e-05	-0.000112305
5.85937e-05	-9.76563e-07	0	-9.76563e-07	0.000129395	-1.46484e-05	-1.17188e-05	1.12305e-05	-7.32422e-06	-2.44141e-06	-0.00012207	2.44141e-07	-0.000182617	2.92969e-06	1.85547e-05	7.32422e-06	1.26953e-05	8.78906e-06	1.36719e-05	8.78906e-06	1.26953e-05	8.78906e-06	1.36719e-05	8.78906e-06	4.29687e-05	1.5625e-05	4.88281e-05	2.58789e-05	6.34766e-06	1.85547e-05	3.02734e-05	1.75781e-05	6.83594e-06	-3.32031e-05	1.85547e-05	1.66016e-05	8.78906e-06	2.14844e-05	6.34766e-06	2.92969e-06	4.88281e-07	6.15234e-05	4.39453e-06	-7.8125e-06	-1.2207e-05	-0.000228516	9.17969e-05	0.000206055
2.63672e-05	-4.39453e-06	-4.39453e-06	-2.44141e-06	6.83594e-05	-2.44141e-05	-2.05078e-05	-7.56836e-06	-7.32422e-06	-1.2207e-05	-3.61328e-05	-2.19727e-06	-0.000168945	-0.000108398	2.34375e-05	7.8125e-06	1.46484e-05	5.85938e-06	1.26953e-05	1.02539e-05	1.46484e-05	5.85938e-06	1.26953e-05	1.02539e-05	2.92969e-05	1.17188e-05	4.39453e-05	1.80664e-05	1.46484e-06	1.85547e-05	3.125e-05	1.66016e-05	1.07422e-05	-0.000162109	1.46484e-05	1.75781e-05	7.32422e-06	1.95313e-05	8.30078e-06	2.14844e-05	-7.8125e-06	5.85938e-06	-1.46484e-05	-1.36719e-05	4.39453e-06	-0.000488281	9.57031e-05	0.000267578
-5.37109e-05	-4.88281e-07	9.76563e-07	4.88281e-07	0.00012207	-2.68555e-05	-2.63672e-05	-8.78906e-06	-9.76563e-06	-2.44141e-06	0.00027832	1.2207e-06	-0.000167969	-0.000144531	1.66016e-05	0	1.46484e-05	7.8125e-06	1.46484e-05	9.27734e-06	1.46484e-05	7.8125e-06	1.46484e-05	9.27734e-06	-3.41797e-06	5.85938e-06	2.19727e-05	1.26953e-05	6.34766e-06	1.75781e-05	3.125e-05	1.75781e-05	9.27734e-06	-0.000165039	1.36719e-05	1.5625e-05	7.32422e-06	1.46484e-05	1.46484e-05	2.34375e-05	5.37109e-06	-6.83594e-06	4.39453e-06	-7.8125e-06	-8.30078e-06	-0.000351562	1.61133e-05	0.00012793
-7.03125e-05	-3.90625e-06	-3.90625e-06	-3.90625e-06	0.000119629	-4.88281e-06	3.90625e-06	-2.92969e-06	-7.32422e-06	-1.2207e-05	0.000151367	7.32422e-07	-0.000177734	2.53906e-05	2.92969e-06	2.44141e-06	1.46484e-05	9.27734e-06	1.5625e-05	7.32422e-06	1.46484e-05	9.27734e-06	1.5625e-05	7.32422e-06	-7.17773e-05	2.92969e-06	2.19727e-05	7.8125e-06	9.76563e-06	1.75781e-05	3.125e-05	1.66016e-05	1.02539e-05	-3.32031e-05	1.07422e-05	1.75781e-05	8.30078e-06	1.17188e-05	2.88086e-05	2.05078e-05	-3.41797e-06	-9.76563e-06	-7.32422e-06	-1.36719e-05	7.32422e-06	-5.76172e-05	-0.000112305	-8.10547e-05
-4.83398e-05	-2.44141e-06	4.88281e-07	-1.95313e-06	4.15039e-05	0	5.85938e-06	-1.44043e-05	-7.32422e-06	-1.2207e-05	0.000128906	-1.46484e-06	-2.05078e-05	8.78906e-05	8.78906e-06	4.88281e-06	1.46484e-05	1.07422e-05	1.46484e-05	8.78906e-06	1.46484e-05	1.07422e-05	1.46484e-05	8.78906e-06	-0.00010791	6.83594e-06	3.90625e-05	7.32422e-06	9.27734e-06	1.75781e-05	2.83203e-05	1.85547e-05	9.76563e-06	-9.76563e-06	1.07422e-05	1.75781e-05	8.30078e-06	9.76563e-06	2.83203e-05	1.75781e-05	1.66016e-05	5.85938e-06	-5.85938e-06	-7.8125e-06	-1.36719e-05	0.000488281	-0.000192871	-7.12891e-05
-4.88281e-07	-6.34766e-06	-4.88281e-06	-4.39453e-06	-6.10352e-05	7.32422e-06	1.36719e-05	1.80664e-05	-7.32422e-06	-1.70898e-05	6.05469e-05	-2.44141e-06	-2.34375e-05	0.000100586	1.95313e-05	8.30078e-06	1.5625e-05	6.83594e-06	1.36719e-05	8.30078e-06	1.5625e-05	6.83594e-06	1.36719e-05	8.30078e-06	-2.05078e-05	1.9043e-05	5.12695e-05	1.17188e-05	-4.88281e-07	1.66016e-05	2.83203e-05	1.66016e-05	9.76563e-06	4.10156e-05	1.17188e-05	1.75781e-05	7.32422e-06	9.76563e-06	2.24609e-05	1.95313e-05	1.46484e-06	-1.66016e-05	-1.5625e-05	-1.75781e-05	5.37109e-06	0.000178711	-5.71289e-05	-5.56641e-05
0.000105957	3.41797e-06	-4.88281e-07	-1.46484e-06	-0.000114746	-4.88281e-06	-4.88281e-06	-2.44141e-06	-7.32422e-06	-7.32422e-06	-7.61719e-05	-1.2207e-06	9.17969e-05	6.44531e-05	1.75781e-05	1.36719e-05	1.46484e-05	8.30078e-06	1.26953e-05	9.27734e-06	1.46484e-05	8.30078e-06	1.26953e-05	9.27734e-06	6.34766e-05	1.26953e-05	5.37109e-05	8.30078e-06	1.46484e-06	1.66016e-05	3.02734e-05	1.66016e-05	9.76563e-06	0.000183594	1.07422e-05	1.66016e-05	5.37109e-06	8.78906e-06	3.32031e-05	1.85547e-05	1.9043e-05	-0.000103516	5.37109e-06	-1.26953e-05	-9.27734e-06	0.000393555	-2.92969e-06	-0.000136719
5.22461e-05	-2.44141e-06	-3.41797e-06	-3.90625e-06	-0.00010498	-2.44141e-06	5.85938e-06	-4.15039e-06	-1.2207e-05	-1.46484e-05	-9.76563e-07	-2.92969e-06	0.000182617	4.29687e-05	2.34375e-05	1.80664e-05	1.5625e-05	9.76563e-06	1.17188e-05	1.02539e-05	1.5625e-05	9.76563e-06	1.17188e-05	1.02539e-05	5.9082e-05	8.78906e-06	5.37109e-05	4.39453e-06	-2.05078e-05	1.75781e-05	2.92969e-05	1.5625e-05	9.27734e-06	0.000116211	1.36719e-05	1.75781e-05	5.85938e-06	5.85938e-06	3.17383e-05	1.66016e-05	-6.34766e-06	-0.00015332	-7.32422e-06	-1.5625e-05	6.83594e-06	0.000368164	2.14844e-05	-5.07812e-05
-6.00586e-05	-9.76563e-07	-2.92969e-06	-2.44141e-06	-8.30078e-05	-2.92969e-05	-2.34375e-05	-7.08008e-06	-2.19727e-05	-7.32422e-06	0.000132813	-1.34277e-05	3.71094e-05	1.17188e-05	5.85938e-06	4.88281e-07	-1.95313e-06	-6.83594e-06	-7.8125e-06	-5.37109e-06	-1.95313e-06	-6.83594e-06	-7.8125e-06	-5.37109e-06	2.83203e-05	-7.8125e-06	2.92969e-05	-1.41602e-05	-4.6875e-05	1.75781e-05	2.83203e-05	1.66016e-05	-4.88281e-07	-7.8125e-06	4.88281e-06	1.17188e-05	1.12305e-05	5.85938e-06	1.26953e-05	1.95313e-05	-1.95313e-06	0.000339844	3.90625e-06	-7.8125e-06	-1.07422e-05	0.000149414	3.56445e-05	1.66016e-05
-7.8125e-06	-2.92969e-06	-5.37109e-06	0	-2.44141e-06	0	8.78906e-06	1.5625e-05	-7.32422e-06	-2.44141e-06	-5.46875e-05	3.41797e-06	-4.88281e-06	2.05078e-05	2.34375e-05	1.80664e-05	1.75781e-05	1.26953e-05	1.75781e-05	1.36719e-05	1.75781e-05	1.26953e-05	1.75781e-05	1.36719e-05	7.08008e-05	1.70898e-05	4.39453e-05	8.30078e-06	-5.76172e-05	2.14844e-05	3.32031e-05	1.95313e-05	1.17188e-05	-7.8125e-05	1.75781e-05	2.05078e-05	1.46484e-05	6.83594e-06	-3.51562e-05	2.05078e-05	-1.07422e-05	5.85937e-05	0	-1.07422e-05	8.30078e-06	-7.8125e-06	2.88086e-05	1.17188e-05
-2.7832e-05	-2.44141e-06	4.88281e-07	4.88281e-07	3.90625e-05	-9.76563e-06	-6.83594e-06	8.54492e-06	-7.32422e-06	-2.68555e-05	-0.000240234	-9.76563e-06	0.000125	2.05078e-05	2.24609e-05	1.51367e-05	1.85547e-05	1.2207e-05	1.85547e-05	1.36719e-05	1.85547e-05	1.2207e-05	1.85547e-05	1.36719e-05	7.71484e-05	1.75781e-05	4.63867e-05	1.17188e-05	-3.02734e-05	1.75781e-05	3.125e-05	1.75781e-05	1.02539e-05	5.37109e-05	1.46484e-05	1.75781e-05	1.26953e-05	4.88281e-06	-8.05664e-05	2.24609e-05	5.85938e-06	-0.000228516	1.95313e-06	-2.92969e-06	-9.76563e-06	-0.000578125	2.39258e-05	7.61719e-05
2.09961e-05	-1.02539e-05	-4.39453e-06	-1.46484e-06	5.61523e-05	-7.32422e-06	9.76563e-07	-6.34766e-06	-9.76563e-06	-2.68555e-05	-0.00025293	-8.05664e-06	8.20313e-05	2.44141e-05	1.95313e-05	1.02539e-05	1.66016e-05	1.02539e-05	1.75781e-05	1.17188e-05	1.66016e-05	1.02539e-05	1.75781e-05	1.17188e-05	6.73828e-05	1.51367e-05	4.88281e-05	1.26953e-05	5.07812e-05	1.5625e-05	2.92969e-05	1.75781e-05	1.02539e-05	5.46875e-05	1.36719e-05	1.85547e-05	9.27734e-06	1.95313e-06	-5.51758e-05	1.95313e-05	-3.41797e-06	1.17188e-05	-1.80664e-05	-5.85938e-06	4.39453e-06	-0.000529297	4.15039e-05	0.000133789
3.85742e-05	-6.34766e-06	4.88281e-07	4.88281e-07	3.17383e-05	-1.46484e-05	-1.26953e-05	-1.80664e-05	-7.32422e-06	9.76563e-06	-0.000108398	8.54492e-06	-7.8125e-06	9.76563e-06	1.75781e-05	9.27734e-06	1.5625e-05	9.27734e-06	1.85547e-05	1.02539e-05	1.5625e-05	9.27734e-06	1.85547e-05	1.02539e-05	-2.7832e-05	-2.44141e-06	3.66211e-05	-4.39453e-06	0.000101074	1.75781e-05	2.92969e-05	1.66016e-05	7.32422e-06	0.000183594	1.17188e-05	1.85547e-05	8.30078e-06	9.76563e-07	-2.44141e-06	1.66016e-05	3.90625e-06	2.34375e-05	-1.26953e-05	2.92969e-06	-1.2207e-05	-0.000291016	4.88281e-06	-0.000120117
-3.125e-05	-7.8125e-06	-4.88281e-06	-4.39453e-06	-4.88281e-06	-7.32422e-06	0	-4.63867e-06	-7.32422e-06	0	2.14844e-05	4.39453e-06	-7.12891e-05	2.44141e-05	1.36719e-05	8.30078e-06	1.46484e-05	1.02539e-05	1.95313e-05	8.78906e-06	1.46484e-05	1.02539e-05	1.95313e-05	8.78906e-06	-0.000189453	-8.00781e-05	-5.37109e-05	-8.54492e-05	4.73633e-05	1.75781e-05	2.83203e-05	1.75781e-05	1.02539e-05	0.000146484	1.26953e-05	1.75781e-05	7.32422e-06	0	-5.85938e-06	2.05078e-05	-2.00195e-05	-3.22266e-05	-8.78906e-06	0	1.95313e-06	-6.64063e-05	-1.80664e-05	-0.000350586
-3.80859e-05	0	0	-2.92969e-06	-2.92969e-05	-1.70898e-05	-1.66016e-05	-7.32422e-07	-9.76563e-06	2.44141e-06	1.75781e-05	3.90625e-06	-0.000226563	4.00391e-05	1.66016e-05	7.32422e-06	1.46484e-05	8.30078e-06	1.75781e-05	9.76563e-06	1.46484e-05	8.30078e-06	1.75781e-05	9.76563e-06	-4.49219e-05	3.80859e-05	6.34766e-05	3.56445e-05	-1.46484e-06	1.66016e-05	2.53906e-05	1.5625e-05	9.76563e-06	-8.78906e-05	1.26953e-05	1.5625e-05	6.83594e-06	0	1.26953e-05	2.05078e-05	-1.75781e-05	-0.000214844	0	2.92969e-06	-1.51367e-05	5.17578e-05	-4.83398e-05	-0.00015332
-5.37109e-06	-8.78906e-06	-5.37109e-06	-6.34766e-06	-3.17383e-05	0	8.78906e-06	4.88281e-06	-7.32422e-06	-7.32422e-06	-5.07812e-05	4.88281e-07	-4.78516e-05	1.36719e-05	1.75781e-05	6.34766e-06	1.5625e-05	8.78906e-06	1.75781e-05	9.76563e-06	1.5625e-05	8.78906e-06	1.75781e-05	9.76563e-06	2.49023e-05	2.92969e-05	6.5918e-05	3.02734e-05	-2.29492e-05	1.75781e-05	2.53906e-05	1.66016e-05	7.32422e-06	-5.07812e-05	1.26953e-05	1.66016e-05	7.8125e-06	9.76563e-07	3.61328e-05	2.34375e-05	-1.95313e-05	-0.000140625	-1.02539e-05	-9.76563e-07	1.46484e-06	0.000260742	-1.5625e-05	0.000165039
-3.71094e-05	-6.83594e-06	4.88281e-07	-4.88281e-07	1.95313e-05	-7.32422e-06	-6.83594e-06	-1.95313e-06	-9.76563e-06	-2.44141e-06	-1.07422e-05	1.46484e-06	0.000258789	-9.76563e-07	1.85547e-05	5.85938e-06	1.46484e-05	8.78906e-06	1.5625e-05	1.07422e-05	1.46484e-05	8.78906e-06	1.5625e-05	1.07422e-05	4.39453e-05	2.34375e-05	6.5918e-05	2.00195e-05	-2.34375e-05	1.66016e-05	2.34375e-05	1.5625e-05	7.32422e-06	-2.24609e-05	1.46484e-05	1.75781e-05	9.27734e-06	-9.76563e-07	3.07617e-05	2.53906e-05	1.02539e-05	-8.30078e-05	-4.39453e-06	3.90625e-06	-1.51367e-05	0.000324219	-1.26953e-05	0.000175781
-4.10156e-05	-1.02539e-05	-5.37109e-06	-1.95313e-06	0.000102539	-1.46484e-05	-1.17188e-05	-1.29395e-05	-9.76563e-06	-9.76563e-06	8.49609e-05	4.88281e-07	0.000236328	-1.36719e-05	1.75781e-05	3.41797e-06	1.36719e-05	7.8125e-06	1.26953e-05	9.27734e-06	1.36719e-05	7.8125e-06	1.26953e-05	9.27734e-06	3.85742e-05	2.14844e-05	5.12695e-05	1.75781e-05	7.32422e-06	1.46484e-05	2.34375e-05	1.85547e-05	6.34766e-06	-2.24609e-05	1.26953e-05	1.66016e-05	1.12305e-05	9.76563e-07	6.68945e-05	2.34375e-05	-1.17188e-05	8.88672e-05	-1.80664e-05	-4.88281e-06	1.46484e-06	0.000335937	3.85742e-05	6.93359e-05
-1.70898e-05	2.44141e-06	5.37109e-06	7.32422e-06	6.83594e-05	-3.17383e-05	-3.71094e-05	-1.19629e-05	-9.76563e-06	-2.44141e-06	0.000204102	-2.44141e-07	5.46875e-05	-4.6875e-05	1.66016e-05	1.95313e-06	1.36719e-05	7.32422e-06	1.17188e-05	7.8125e-06	1.36719e-05	7.32422e-06	1.17188e-05	7.8125e-06	1.70898e-05	4.39453e-06	2.92969e-05	5.37109e-06	6.44531e-05	1.36719e-05	2.05078e-05	1.75781e-05	7.8125e-06	-3.02734e-05	1.36719e-05	1.75781e-05	8.30078e-06	0	6.64063e-05	1.85547e-05	4.39453e-06	0.00012793	1.95313e-06	3.90625e-06	-8.30078e-06	7.22656e-05	1.70898e-05	2.73438e-05
2.44141e-06	0	-3.41797e-06	-1.95313e-06	7.32422e-06	-1.70898e-05	-1.17188e-05	-2.44141e-07	-9.76563e-06	-1.2207e-05	0.000117187	-2.19727e-06	-7.61719e-05	-2.05078e-05	1.46484e-05	4.88281e-07	1.36719e-05	6.83594e-06	1.36719e-05	5.37109e-06	1.36719e-05	6.83594e-06	1.36719e-05	5.37109e-06	6.83594e-06	2.44141e-06	1.95313e-05	4.39453e-06	7.91016e-05	1.46484e-05	2.14844e-05	1.46484e-05	6.83594e-06	-3.61328e-05	1.46484e-05	1.5625e-05	8.78906e-06	-9.76563e-07	3.90625e-05	1.66016e-05	-1.2207e-05	0.000261719	-9.76563e-06	3.90625e-06	4.88281e-06	-8.10547e-05	1.95313e-05	-8.78906e-06
1.70898e-05	6.34766e-06	-4.88281e-07	-4.88281e-07	-1.2207e-05	4.88281e-06	8.78906e-06	1.19629e-05	-9.76563e-06	-7.32422e-06	0.000104492	-4.88281e-07	-2.73438e-05	3.22266e-05	1.66016e-05	5.85938e-06	1.46484e-05	8.30078e-06	1.17188e-05	4.39453e-06	1.46484e-05	8.30078e-06	1.17188e-05	4.39453e-06	-2.34375e-05	8.30078e-06	2.19727e-05	6.83594e-06	2.14844e-05	1.66016e-05	2.14844e-05	1.66016e-05	8.30078e-06	-2.14844e-05	1.26953e-05	1.66016e-05	6.34766e-06	-4.88281e-06	3.90625e-06	9.76563e-06	-4.88281e-07	6.83594e-05	2.19727e-05	1.46484e-05	-1.17188e-05	-0.000304687	1.31836e-05	1.75781e-05
0	-1.46484e-06	-6.34766e-06	-4.88281e-06	-2.68555e-05	9.76563e-06	1.85547e-05	9.27734e-06	-7.32422e-06	-1.70898e-05	-9.57031e-05	-2.68555e-06	5.37109e-05	3.71094e-05	1.66016e-05	8.78906e-06	1.46484e-05	7.32422e-06	1.17188e-05	6.34766e-06	1.46484e-05	7.32422e-06	1.17188e-05	6.34766e-06	-2.92969e-05	8.30078e-06	3.17383e-05	1.2207e-05	-1.36719e-05	1.66016e-05	2.14844e-05	1.5625e-05	7.8125e-06	-6.15234e-05	8.78906e-06	1.5625e-05	6.34766e-06	-1.95313e-06	2.92969e-06	1.07422e-05	-1.85547e-05	-0.000136719	4.39453e-06	7.8125e-06	3.41797e-06	-0.000167969	1.75781e-05	-3.51562e-05
-2.09961e-05	1.46484e-06	-9.76563e-07	4.88281e-07	-5.85937e-05	-7.32422e-06	-9.76563e-07	-8.05664e-06	-9.76563e-06	-7.32422e-06	-0.000154297	7.32422e-07	4.39453e-05	2.73438e-05	1.66016e-05	9.27734e-06	1.46484e-05	6.34766e-06	1.36719e-05	7.8125e-06	1.46484e-05	6.34766e-06	1.36719e-05	7.8125e-06	2.14844e-05	1.51367e-05	5.61523e-05	2.05078e-05	-4.88281e-07	1.66016e-05	2.34375e-05	1.5625e-05	7.8125e-06	-6.15234e-05	9.76563e-06	1.66016e-05	6.34766e-06	1.46484e-05	1.95313e-06	1.85547e-05	3.41797e-06	-5.95703e-05	9.76563e-06	1.07422e-05	-1.2207e-05	0.000194336	6.34766e-06	-2.44141e-05
-3.4668e-05	-7.32422e-06	-4.39453e-06	-5.85938e-06	-4.88281e-05	-2.44141e-06	9.76563e-06	2.44141e-06	-9.76563e-06	-1.2207e-05	-0.00019043	-9.76563e-07	-6.54297e-05	3.125e-05	1.75781e-05	2.05078e-05	1.5625e-05	1.02539e-05	1.46484e-05	6.83594e-06	1.5625e-05	1.02539e-05	1.46484e-05	6.83594e-06	4.78516e-05	1.36719e-05	6.5918e-05	1.5625e-05	6.34766e-06	1.66016e-05	2.05078e-05	1.5625e-05	7.32422e-06	-3.90625e-06	1.26953e-05	1.5625e-05	7.32422e-06	0.000129883	1.95313e-06	2.05078e-05	-1.12305e-05	-1.66016e-05	1.46484e-05	6.83594e-06	6.34766e-06	0.000173828	1.80664e-05	3.90625e-06
-9.27734e-06	-3.41797e-06	0	-1.95313e-06	-3.90625e-05	-1.46484e-05	-8.78906e-06	7.32422e-06	-7.32422e-06	-2.44141e-06	-0.000179687	2.19727e-06	-0.000155273	4.29687e-05	1.5625e-05	1.26953e-05	1.66016e-05	1.17188e-05	1.5625e-05	9.76563e-06	1.66016e-05	1.17188e-05	1.5625e-05	9.76563e-06	4.6875e-05	8.30078e-06	6.34766e-05	1.51367e-05	-9.76563e-07	1.66016e-05	2.05078e-05	1.75781e-05	8.78906e-06	4.88281e-05	1.26953e-05	1.5625e-05	8.30078e-06	4.78516e-05	-1.2207e-05	1.75781e-05	9.76563e-06	2.05078e-05	3.125e-05	1.07422e-05	-1.02539e-05	0.00022168	-6.68945e-05	-4.98047e-05
1.5625e-05	-1.07422e-05	-5.37109e-06	-4.39453e-06	-7.56836e-05	-4.88281e-06	3.90625e-06	6.34766e-06	-7.32422e-06	-2.44141e-06	-9.375e-05	1.95313e-06	-7.42187e-05	3.71094e-05	1.5625e-05	1.02539e-05	1.5625e-05	9.27734e-06	1.66016e-05	1.17188e-05	1.5625e-05	9.27734e-06	1.66016e-05	1.17188e-05	1.5625e-05	6.34766e-06	5.12695e-05	1.26953e-05	-2.88086e-05	1.66016e-05	2.05078e-05	1.5625e-05	8.78906e-06	4.00391e-05	1.46484e-05	1.5625e-05	6.34766e-06	-0.000135742	-1.07422e-05	1.66016e-05	-5.85938e-06	-0.000231445	4.88281e-07	3.90625e-06	5.85938e-06	3.90625e-05	-2.97852e-05	-2.83203e-05
5.41992e-05	-9.76563e-07	-1.46484e-06	-9.76563e-07	-5.61523e-05	-1.46484e-05	-1.46484e-05	-2.44141e-06	-9.76563e-06	0	-0.00015625	2.44141e-07	-3.02734e-05	2.73438e-05	1.66016e-05	1.12305e-05	1.75781e-05	9.76563e-06	1.75781e-05	8.30078e-06	1.75781e-05	9.76563e-06	1.75781e-05	8.30078e-06	-2.05078e-05	8.78906e-06	3.41797e-05	1.51367e-05	-3.61328e-05	1.66016e-05	2.14844e-05	1.75781e-05	7.8125e-06	3.02734e-05	1.26953e-05	1.46484e-05	7.32422e-06	-6.25e-05	1.31836e-05	1.85547e-05	-7.32422e-06	-7.61719e-05	-2.44141e-06	8.78906e-06	-1.2207e-05	-0.000114258	4.6875e-05	-2.34375e-05
2.83203e-05	-2.92969e-06	-4.39453e-06	-3.90625e-06	-4.39453e-05	-4.88281e-06	0	-4.15039e-06	-1.2207e-05	-4.39453e-05	-0.000285156	-1.48926e-05	-2.73438e-05	2.24609e-05	1.5625e-05	1.17188e-05	1.46484e-05	8.30078e-06	1.66016e-05	7.32422e-06	1.46484e-05	8.30078e-06	1.66016e-05	7.32422e-06	-3.51562e-05	1.46484e-05	3.17383e-05	2.29492e-05	-3.75977e-05	1.5625e-05	2.05078e-05	1.46484e-05	7.32422e-06	4.88281e-06	1.66016e-05	1.46484e-05	8.30078e-06	-2.34375e-05	1.46484e-05	1.95313e-05	-3.125e-05	-3.71094e-05	-3.36914e-05	9.76563e-07	3.90625e-06	2.44141e-05	7.4707e-05	-2.14844e-05
-3.90625e-05	5.85938e-06	9.76563e-07	-4.88281e-07	-1.95313e-05	-1.95313e-05	-1.5625e-05	-1.46484e-06	-1.2207e-05	-2.44141e-05	-0.000143555	-7.08008e-06	-2.63672e-05	1.75781e-05	1.46484e-05	8.78906e-06	1.46484e-05	8.78906e-06	1.5625e-05	9.76563e-06	1.46484e-05	8.78906e-06	1.5625e-05	9.76563e-06	-3.85742e-05	1.07422e-05	3.90625e-05	1.66016e-05	-1.41602e-05	1.66016e-05	2.14844e-05	1.75781e-05	8.30078e-06	5.85937e-05	1.75781e-05	1.66016e-05	8.78906e-06	-7.8125e-06	4.39453e-06	1.95313e-05	-3.27148e-05	4.6875e-05	-3.61328e-05	8.78906e-06	-1.12305e-05	-0.000180664	-5.27344e-05	-1.85547e-05
-7.86133e-05	-5.37109e-06	-6.83594e-06	-6.83594e-06	-7.32422e-06	-7.32422e-06	-3.90625e-06	4.88281e-07	-4.88281e-06	1.2207e-05	-7.8125e-06	7.56836e-06	0.000142578	2.24609e-05	1.85547e-05	6.83594e-06	1.5625e-05	9.76563e-06	1.75781e-05	1.02539e-05	1.5625e-05	9.76563e-06	1.75781e-05	1.02539e-05	-2.88086e-05	0	4.63867e-05	3.90625e-06	2.7832e-05	1.75781e-05	2.34375e-05	1.66016e-05	8.78906e-06	5.76172e-05	1.85547e-05	1.75781e-05	9.27734e-06	4.98047e-05	2.92969e-06	2.05078e-05	-4.98047e-05	6.83594e-05	-4.15039e-05	8.78906e-06	5.37109e-06	-0.000273438	-0.000148926	2.92969e-06
-7.8125e-05	-4.88281e-06	0	0	-2.44141e-05	-1.95313e-05	-1.5625e-05	-3.17383e-06	-7.32422e-06	1.2207e-05	0.00012207	6.83594e-06	0.000223633	2.53906e-05	1.75781e-05	6.34766e-06	1.5625e-05	6.83594e-06	1.85547e-05	8.30078e-06	1.5625e-05	6.83594e-06	1.85547e-05	8.30078e-06	-6.98242e-05	-3.36914e-05	7.32422e-06	-2.09961e-05	6.39648e-05	1.66016e-05	2.34375e-05	1.5625e-05	8.30078e-06	2.73438e-05	1.36719e-05	1.5625e-05	9.76563e-06	0.000168945	-1.70898e-05	2.14844e-05	-2.97852e-05	-0.000174805	-2.44141e-05	1.5625e-05	-1.2207e-05	2.34375e-05	-7.71484e-05	0
-8.78906e-06	-1.61133e-05	-6.34766e-06	-3.90625e-06	1.46484e-05	-2.44141e-06	3.90625e-06	1.95313e-06	-9.76563e-06	-2.44141e-06	0.000132813	2.68555e-06	0.000128906	2.14844e-05	1.46484e-05	6.34766e-06	1.66016e-05	9.76563e-06	1.95313e-05	8.78906e-06	1.66016e-05	9.76563e-06	1.95313e-05	8.78906e-06	-1.95313e-06	2.92969e-05	6.5918e-05	3.51562e-05	6.5918e-05	1.66016e-05	2.24609e-05	1.66016e-05	5.85938e-06	2.53906e-05	8.78906e-06	1.5625e-05	8.78906e-06	0.000143555	-2.44141e-05	1.75781e-05	2.29492e-05	-8.59375e-05	-1.85547e-05	9.76563e-06	3.90625e-06	0.000168945	4.39453e-06	-6.83594e-06
8.49609e-05	-6.34766e-06	0	-9.76563e-07	7.8125e-05	-2.44141e-06	0	1.70898e-06	-9.76563e-06	0	0.00012793	3.17383e-06	-0.000133789	2.24609e-05	1.85547e-05	7.8125e-06	1.5625e-05	9.76563e-06	1.85547e-05	9.27734e-06	1.5625e-05	9.76563e-06	1.85547e-05	9.27734e-06	-4.29687e-05	2.44141e-05	5.12695e-05	2.83203e-05	5.37109e-05	1.5625e-05	1.36719e-05	1.5625e-05	7.32422e-06	3.90625e-05	6.83594e-06	1.66016e-05	7.32422e-06	7.8125e-06	0	1.95313e-05	9.375e-05	1.95313e-06	6.34766e-06	1.75781e-05	-1.31836e-05	5.66406e-05	1.80664e-05	-5.85937e-05
8.00781e-05	-7.8125e-06	-3.90625e-06	-3.41797e-06	7.56836e-05	2.44141e-06	4.88281e-06	-1.70898e-06	-9.76563e-06	-1.2207e-05	7.8125e-05	1.46484e-06	-7.8125e-05	2.14844e-05	2.14844e-05	1.07422e-05	1.5625e-05	9.76563e-06	1.95313e-05	1.07422e-05	1.5625e-05	9.76563e-06	1.95313e-05	1.07422e-05	-5.61523e-05	2.39258e-05	4.88281e-05	2.29492e-05	4.10156e-05	1.5625e-05	1.17188e-05	1.5625e-05	7.8125e-06	4.49219e-05	0	1.5625e-05	4.88281e-06	-0.000125977	3.07617e-05	1.95313e-05	5.81055e-05	1.46484e-05	1.95313e-06	7.8125e-06	3.41797e-06	8.00781e-05	1.07422e-05	-1.17188e-05
3.51562e-05	-4.88281e-06	4.88281e-07	-4.88281e-07	2.19727e-05	-2.92969e-05	-3.22266e-05	-1.63574e-05	-7.32422e-06	-2.44141e-06	0.000454102	1.46484e-06	4.78516e-05	1.75781e-05	2.24609e-05	9.76563e-06	1.66016e-05	1.02539e-05	1.66016e-05	1.02539e-05	1.66016e-05	1.02539e-05	1.66016e-05	1.02539e-05	5.61523e-05	1.12305e-05	3.90625e-05	1.75781e-05	4.63867e-05	1.5625e-05	1.85547e-05	1.5625e-05	7.8125e-06	2.44141e-05	2.92969e-06	1.75781e-05	5.85938e-06	-0.000335937	3.75977e-05	1.75781e-05	4.73633e-05	4.00391e-05	1.41602e-05	1.36719e-05	-1.31836e-05	-1.17188e-05	2.34375e-05	1.5625e-05
1.31836e-05	-1.26953e-05	-4.88281e-06	-4.39453e-06	-1.70898e-05	-2.19727e-05	-1.26953e-05	-1.00098e-05	-9.76563e-06	-1.46484e-05	0.000616211	-2.44141e-06	4.98047e-05	2.34375e-05	1.95313e-05	3.90625e-06	1.66016e-05	9.27734e-06	1.75781e-05	9.27734e-06	1.66016e-05	9.27734e-06	1.75781e-05	9.27734e-06	7.91016e-05	-1.46484e-06	7.32422e-06	6.34766e-06	6.88477e-05	1.36719e-05	2.34375e-05	1.46484e-05	7.8125e-06	1.85547e-05	9.76563e-06	1.66016e-05	6.83594e-06	-0.000224609	3.32031e-05	1.46484e-05	1.61133e-05	9.76563e-07	-4.88281e-06	1.07422e-05	5.37109e-06	-0.000102539	0.000100098	2.05078e-05
1.26953e-05	-1.95313e-06	0	-4.88281e-07	-2.68555e-05	-1.70898e-05	-1.46484e-05	-1.46484e-06	-9.76563e-06	-4.88281e-06	0.000333984	-1.70898e-06	-1.95313e-05	2.24609e-05	1.17188e-05	4.88281e-07	1.46484e-05	8.78906e-06	1.66016e-05	9.27734e-06	1.46484e-05	8.78906e-06	1.66016e-05	9.27734e-06	8.25195e-05	1.46484e-06	-1.46484e-05	9.27734e-06	6.34766e-06	1.36719e-05	2.05078e-05	1.36719e-05	6.34766e-06	3.02734e-05	2.05078e-05	1.85547e-05	1.02539e-05	0.000242187	1.17188e-05	1.5625e-05	-2.14844e-05	4.49219e-05	1.95313e-06	1.26953e-05	-7.8125e-06	-4.49219e-05	5.46875e-05	8.78906e-06
-7.27539e-05	-1.46484e-06	-5.37109e-06	-3.41797e-06	-7.56836e-05	4.88281e-06	1.66016e-05	9.52148e-06	-7.32422e-06	-1.95313e-05	-0.000266602	-3.90625e-06	4.98047e-05	1.46484e-05	1.07422e-05	2.44141e-06	1.5625e-05	8.78906e-06	1.5625e-05	9.76563e-06	1.5625e-05	8.78906e-06	1.5625e-05	9.76563e-06	3.22266e-05	5.37109e-06	-3.17383e-05	7.8125e-06	-7.32422e-05	1.36719e-05	2.24609e-05	1.75781e-05	7.8125e-06	4.58984e-05	2.73438e-05	1.85547e-05	9.76563e-06	7.12891e-05	1.9043e-05	1.66016e-05	-4.44336e-05	0.000103516	-1.5625e-05	5.85938e-06	5.85938e-06	9.17969e-05	-6.73828e-05	8.78906e-06
-0.000147461	5.37109e-06	4.88281e-07	-1.95313e-06	-0.000246582	-9.76563e-06	-3.90625e-06	-1.95313e-06	-7.32422e-06	-1.2207e-05	-0.000380859	-2.19727e-06	3.71094e-05	9.76563e-06	1.36719e-05	4.88281e-06	1.66016e-05	8.30078e-06	1.5625e-05	8.78906e-06	1.66016e-05	8.30078e-06	1.5625e-05	8.78906e-06	-5.85938e-06	1.51367e-05	-1.46484e-05	1.95313e-05	-4.6875e-05	1.5625e-05	2.34375e-05	1.95313e-05	7.8125e-06	5.07812e-05	2.44141e-05	1.66016e-05	7.8125e-06	-5.07812e-05	-6.83594e-06	1.5625e-05	-3.90625e-06	-7.8125e-06	-1.5625e-05	1.17188e-05	-1.17188e-05	5.85937e-05	-0.000125	-3.90625e-06
-0.000105957	1.46484e-06	-5.37109e-06	-4.39453e-06	-0.000427246	2.44141e-06	7.8125e-06	-1.19629e-05	-9.76563e-06	-1.70898e-05	-0.000415039	-1.95313e-06	-0.00021875	2.92969e-06	1.36719e-05	1.36719e-05	1.66016e-05	8.78906e-06	2.14844e-05	7.8125e-06	1.66016e-05	8.78906e-06	2.14844e-05	7.8125e-06	0	2.09961e-05	8.30078e-05	2.53906e-05	-5.66406e-05	1.75781e-05	1.66016e-05	1.66016e-05	7.8125e-06	5.17578e-05	1.95313e-05	1.95313e-05	8.78906e-06	0.000142578	9.27734e-06	1.5625e-05	-5.85938e-06	-0.000266602	-2.14844e-05	5.85938e-06	1.46484e-06	-4.39453e-05	-2.09961e-05	2.92969e-06
-0.000148437	6.34766e-06	-1.46484e-06	-1.46484e-06	-0.000373535	-1.2207e-05	-9.76563e-06	6.34766e-06	-7.32422e-06	-9.76563e-06	-0.000332031	-7.32422e-07	-0.000267578	2.92969e-06	1.36719e-05	1.36719e-05	1.75781e-05	9.76563e-06	2.24609e-05	8.78906e-06	1.75781e-05	9.76563e-06	2.24609e-05	8.78906e-06	1.95313e-06	2.09961e-05	0.000197754	2.14844e-05	-4.78516e-05	1.75781e-05	7.8125e-06	1.75781e-05	7.8125e-06	4.88281e-05	1.26953e-05	1.75781e-05	1.02539e-05	0.000259766	2.14844e-05	1.46484e-05	-1.61133e-05	-4.10156e-05	1.51367e-05	9.76563e-06	-1.46484e-05	-8.00781e-05	-8.30078e-06	-3.90625e-06
-0.000113281	1.95313e-06	-4.88281e-06	-4.39453e-06	-0.000131836	-7.32422e-06	3.90625e-06	1.70898e-05	-9.76563e-06	0	-0.000163086	2.68555e-06	-5.85938e-06	9.76563e-06	1.5625e-05	1.36719e-05	1.75781e-05	7.32422e-06	2.34375e-05	6.34766e-06	1.75781e-05	7.32422e-06	2.34375e-05	6.34766e-06	1.85547e-05	1.26953e-05	0.000141602	1.51367e-05	-3.17383e-05	1.75781e-05	1.26953e-05	1.66016e-05	8.30078e-06	4.29687e-05	1.07422e-05	1.46484e-05	7.8125e-06	-0.00012207	1.95313e-05	1.66016e-05	-5.51758e-05	0.000217773	2.29492e-05	2.92969e-06	3.41797e-06	1.46484e-05	5.85938e-06	2.92969e-06
7.61719e-05	1.95313e-06	-4.88281e-07	-9.76563e-07	0.000200195	-1.46484e-05	-1.17188e-05	3.90625e-06	-9.76563e-06	4.88281e-06	-7.8125e-05	2.92969e-06	7.8125e-05	2.05078e-05	1.46484e-05	9.76563e-06	1.75781e-05	8.78906e-06	2.24609e-05	5.85938e-06	1.75781e-05	8.78906e-06	2.24609e-05	5.85938e-06	3.75977e-05	7.32422e-06	0.000126953	1.07422e-05	1.46484e-05	1.75781e-05	1.36719e-05	1.5625e-05	8.30078e-06	3.71094e-05	1.66016e-05	1.75781e-05	5.37109e-06	-0.000520508	8.78906e-06	1.75781e-05	-2.05078e-05	0.000203125	1.95313e-05	9.76563e-06	-1.17188e-05	2.92969e-06	4.83398e-05	-5.85938e-06
0.000189453	-3.90625e-06	-5.85938e-06	-5.85938e-06	0.00064209	-2.44141e-06	1.95313e-06	-9.76563e-06	-9.76563e-06	-1.70898e-05	3.125e-05	-6.5918e-06	-1.5625e-05	2.92969e-05	1.5625e-05	8.30078e-06	1.75781e-05	6.83594e-06	2.05078e-05	3.90625e-06	1.75781e-05	6.83594e-06	2.05078e-05	3.90625e-06	3.07617e-05	9.27734e-06	0.000126953	9.27734e-06	3.66211e-05	1.66016e-05	1.46484e-05	1.5625e-05	9.27734e-06	3.51562e-05	1.26953e-05	1.75781e-05	5.37109e-06	-3.22266e-05	1.02539e-05	1.75781e-05	-1.12305e-05	-5.85938e-06	-6.34766e-06	9.76563e-07	1.46484e-06	5.17578e-05	9.66797e-05	2.92969e-06
0.000106445	0	-4.88281e-07	-9.76563e-07	0.000654297	-1.46484e-05	-1.26953e-05	-1.63574e-05	-9.76563e-06	-2.68555e-05	0.000332031	-1.17188e-05	9.57031e-05	2.63672e-05	1.66016e-05	7.32422e-06	1.5625e-05	7.32422e-06	1.85547e-05	4.88281e-06	1.5625e-05	7.32422e-06	1.85547e-05	4.88281e-06	3.4668e-05	1.80664e-05	8.30078e-05	1.36719e-05	3.22266e-05	1.75781e-05	1.75781e-05	1.46484e-05	8.30078e-06	3.32031e-05	1.36719e-05	1.66016e-05	8.30078e-06	0.000120117	1.02539e-05	1.85547e-05	3.75977e-05	-8.30078e-05	-3.41797e-06	9.76563e-07	-1.07422e-05	-5.85938e-06	9.86328e-05	-9.76563e-07
-4.39453e-06	-6.34766e-06	-5.37109e-06	-3.90625e-06	0.000131836	-4.88281e-06	-1.95313e-06	1.58691e-05	-1.2207e-05	-2.68555e-05	0.000439453	-8.78906e-06	8.59375e-05	2.05078e-05	1.66016e-05	6.34766e-06	1.66016e-05	9.27734e-06	1.5625e-05	7.32422e-06	1.66016e-05	9.27734e-06	1.5625e-05	7.32422e-06	1.41602e-05	-1.95313e-06	0	2.44141e-06	1.95313e-05	1.75781e-05	1.66016e-05	1.66016e-05	8.30078e-06	3.90625e-05	1.46484e-05	1.46484e-05	6.34766e-06	0.000208008	2.92969e-06	1.66016e-05	3.61328e-05	-0.000162109	-1.70898e-05	-7.8125e-06	5.85938e-06	7.8125e-06	6.34766e-05	7.8125e-06
-5.12695e-05	-4.88281e-07	1.95313e-06	-4.88281e-07	-0.000314941	-1.95313e-05	-1.5625e-05	1.87988e-05	-7.32422e-06	2.68555e-05	0.000393555	8.54492e-06	9.27734e-05	1.17188e-05	1.75781e-05	6.34766e-06	1.5625e-05	7.8125e-06	1.46484e-05	7.32422e-06	1.5625e-05	7.8125e-06	1.46484e-05	7.32422e-06	-6.00586e-05	-6.5918e-05	-0.00012207	-6.5918e-05	3.02734e-05	1.85547e-05	1.66016e-05	1.66016e-05	7.32422e-06	3.80859e-05	1.17188e-05	1.66016e-05	4.88281e-06	0.000289062	-6.34766e-06	9.76563e-06	2.7832e-05	-3.51562e-05	-7.8125e-06	-3.90625e-06	-1.17188e-05	4.88281e-06	-4.83398e-05	-1.95313e-06
-9.52148e-05	-6.34766e-06	-4.39453e-06	-3.41797e-06	-0.000192871	-7.32422e-06	9.76563e-07	9.76563e-07	-7.32422e-06	7.32422e-06	9.08203e-05	4.15039e-06	8.59375e-05	1.17188e-05	1.75781e-05	5.85938e-06	1.66016e-05	5.37109e-06	1.66016e-05	8.30078e-06	1.66016e-05	5.37109e-06	1.66016e-05	8.30078e-06	-1.75781e-05	9.76563e-07	-0.000129395	8.78906e-06	3.61328e-05	1.5625e-05	1.66016e-05	1.5625e-05	1.02539e-05	3.71094e-05	1.17188e-05	1.36719e-05	3.90625e-06	0.000182617	-2.44141e-06	9.76563e-06	9.76563e-07	8.98437e-05	-1.9043e-05	-1.17188e-05	5.85938e-06	-0.000112305	-0.000131348	5.85938e-06
-0.000157227	-4.88281e-07	-9.76563e-07	4.88281e-07	-8.05664e-05	-1.2207e-05	-4.88281e-06	-8.30078e-06	-7.32422e-06	-2.92969e-05	-0.000144531	2.68555e-06	0.000193359	7.8125e-06	1.17188e-05	1.46484e-06	1.85547e-05	7.32422e-06	1.36719e-05	7.32422e-06	1.85547e-05	7.32422e-06	1.36719e-05	7.32422e-06	4.24805e-05	3.4668e-05	-9.0332e-05	3.125e-05	2.19727e-05	1.5625e-05	1.5625e-05	1.66016e-05	8.30078e-06	3.32031e-05	1.26953e-05	1.5625e-05	9.27734e-06	5.07812e-05	9.76563e-07	9.76563e-06	1.17188e-05	1.36719e-05	-8.30078e-06	-4.88281e-06	-8.78906e-06	-0.000222656	-0.000123047	2.92969e-06
-1.12305e-05	-7.32422e-06	-3.90625e-06	-4.39453e-06	-0.00015625	-4.88281e-06	9.76563e-06	-3.66211e-06	-4.88281e-06	-0.000161133	-0.000379883	1.70898e-06	0.000117187	1.36719e-05	1.75781e-05	7.8125e-06	1.66016e-05	5.85938e-06	1.36719e-05	5.85938e-06	1.66016e-05	5.85938e-06	1.36719e-05	5.85938e-06	5.46875e-05	2.83203e-05	-2.68555e-05	2.39258e-05	7.8125e-06	1.36719e-05	1.5625e-05	1.5625e-05	8.78906e-06	3.41797e-05	1.46484e-05	1.75781e-05	1.12305e-05	6.34766e-05	2.92969e-06	7.8125e-06	-1.61133e-05	-5.85937e-05	-1.75781e-05	-9.76563e-06	4.39453e-06	-8.88672e-05	-8.59375e-05	7.8125e-06
7.8125e-05	-4.39453e-06	-4.88281e-07	-1.46484e-06	-0.000170898	-1.46484e-05	-1.17188e-05	-2.19727e-06	-7.32422e-06	6.34766e-05	-0.000224609	1.46484e-06	-0.000210937	1.46484e-05	1.85547e-05	8.30078e-06	1.66016e-05	4.88281e-06	1.46484e-05	7.32422e-06	1.66016e-05	4.88281e-06	1.46484e-05	7.32422e-06	5.81055e-05	2.00195e-05	0.000124512	1.9043e-05	-1.46484e-06	1.46484e-05	1.66016e-05	1.5625e-05	7.8125e-06	3.125e-05	1.5625e-05	1.66016e-05	7.8125e-06	-0.000123047	6.34766e-06	8.78906e-06	-8.30078e-06	-0.000132813	-1.46484e-06	-5.85938e-06	-1.17188e-05	6.25e-05	-8.10547e-05	-5.85938e-06
0.000141602	-1.41602e-05	-4.39453e-06	-4.39453e-06	-0.000222168	-2.44141e-05	-2.24609e-05	-1.09863e-05	-9.76563e-06	0.00010498	-9.76563e-05	-2.44141e-07	-0.000331055	2.05078e-05	1.5625e-05	6.83594e-06	1.66016e-05	5.37109e-06	1.5625e-05	7.8125e-06	1.66016e-05	5.37109e-06	1.5625e-05	7.8125e-06	4.05273e-05	1.02539e-05	4.39453e-05	7.8125e-06	-7.8125e-06	1.46484e-05	1.66016e-05	1.75781e-05	8.30078e-06	2.92969e-05	1.75781e-05	1.75781e-05	5.37109e-06	-0.000430664	-4.88281e-06	1.36719e-05	-1.31836e-05	-4.00391e-05	-1.36719e-05	-1.66016e-05	1.95313e-06	8.30078e-05	9.27734e-06	9.76563e-07
0.000132324	-7.32422e-06	0	4.88281e-07	-4.15039e-05	-2.44141e-05	-2.92969e-05	-2.51465e-05	-9.76563e-06	1.95313e-05	0.000163086	0	7.71484e-05	2.34375e-05	1.17188e-05	0	1.75781e-05	6.34766e-06	1.66016e-05	9.27734e-06	1.75781e-05	6.34766e-06	1.66016e-05	9.27734e-06	1.46484e-05	7.32422e-06	-9.0332e-05	2.44141e-06	-1.07422e-05	1.66016e-05	1.5625e-05	1.5625e-05	8.78906e-06	2.83203e-05	1.75781e-05	1.85547e-05	6.34766e-06	-6.25e-05	-1.46484e-05	2.24609e-05	5.37109e-06	8.78906e-05	1.80664e-05	-1.26953e-05	-1.12305e-05	2.24609e-05	3.125e-05	-4.88281e-06
2.92969e-05	-6.34766e-06	-2.92969e-06	-2.92969e-06	8.05664e-05	2.44141e-06	1.36719e-05	-1.0498e-05	-9.76563e-06	2.44141e-06	0.000177734	-2.19727e-06	0.000262695	1.75781e-05	1.17188e-05	1.46484e-06	1.66016e-05	6.34766e-06	1.75781e-05	9.27734e-06	1.66016e-05	6.34766e-06	1.75781e-05	9.27734e-06	-2.39258e-05	7.32422e-06	5.61523e-05	5.85938e-06	-1.17188e-05	1.66016e-05	1.46484e-05	1.5625e-05	8.78906e-06	2.63672e-05	1.95313e-05	1.95313e-05	1.02539e-05	0.000146484	5.37109e-06	2.44141e-05	-1.02539e-05	-5.85938e-06	-9.76563e-07	-1.46484e-05	3.41797e-06	1.75781e-05	2.68555e-05	9.76563e-07
-5.85938e-06	1.95313e-06	4.88281e-07	-1.46484e-06	6.83594e-05	0	5.85938e-06	2.27051e-05	-9.76563e-06	-3.41797e-05	4.6875e-05	-1.46484e-06	0.000302734	1.26953e-05	1.46484e-05	5.85938e-06	1.75781e-05	4.88281e-06	1.5625e-05	8.30078e-06	1.75781e-05	4.88281e-06	1.5625e-05	8.30078e-06	-6.29883e-05	7.8125e-06	0.000244141	8.78906e-06	-1.2207e-05	1.5625e-05	1.5625e-05	1.66016e-05	8.78906e-06	2.63672e-05	1.95313e-05	1.66016e-05	1.17188e-05	0.000178711	-9.76563e-07	2.44141e-05	-9.76563e-07	-9.76563e-07	4.88281e-07	-1.26953e-05	-1.70898e-05	-2.05078e-05	2.92969e-06	-5.85938e-06
-2.05078e-05	9.76563e-07	-6.34766e-06	-2.44141e-06	-0.000119629	2.44141e-06	1.36719e-05	1.31836e-05	-9.76563e-06	-9.0332e-05	7.91016e-05	-2.19727e-06	0.000225586	2.92969e-06	1.66016e-05	6.34766e-06	1.5625e-05	5.37109e-06	1.66016e-05	7.8125e-06	1.5625e-05	5.37109e-06	1.66016e-05	7.8125e-06	1.85547e-05	1.41602e-05	0.000385742	1.70898e-05	-1.02539e-05	1.5625e-05	1.66016e-05	1.5625e-05	7.32422e-06	2.53906e-05	1.75781e-05	1.75781e-05	9.27734e-06	0.000117187	-7.32422e-06	2.05078e-05	-6.34766e-06	2.73438e-05	-5.85938e-06	-1.75781e-05	4.39453e-06	-1.75781e-05	2.24609e-05	9.76563e-07
-2.88086e-05	3.90625e-06	-1.95313e-06	-4.88281e-07	9.0332e-05	-9.76563e-06	-8.78906e-06	-2.44141e-06	-9.76563e-06	6.83594e-05	-0.000131836	-1.46484e-06	0.000275391	-3.90625e-06	1.26953e-05	1.17188e-05	1.66016e-05	5.85938e-06	1.5625e-05	7.8125e-06	1.66016e-05	5.85938e-06	1.5625e-05	7.8125e-06	3.41797e-05	1.02539e-05	0.000258789	1.2207e-05	-8.78906e-06	1.5625e-05	1.75781e-05	1.66016e-05	8.30078e-06	2.44141e-05	1.5625e-05	1.5625e-05	6.83594e-06	9.47266e-05	0	1.66016e-05	1.02539e-05	8.78906e-06	1.46484e-06	-1.46484e-05	-1.31836e-05	-2.44141e-05	8.30078e-06	-7.8125e-06
-3.80859e-05	-2.92969e-06	-6.34766e-06	-4.39453e-06	0.000195313	0	4.88281e-06	-1.24512e-05	-7.32422e-06	2.44141e-05	-0.000174805	-3.41797e-06	0.000160156	6.83594e-06	1.85547e-05	1.61133e-05	1.66016e-05	6.83594e-06	1.5625e-05	6.83594e-06	1.66016e-05	6.83594e-06	1.5625e-05	6.83594e-06	2.29492e-05	1.46484e-05	-2.44141e-06	7.32422e-06	-5.37109e-06	1.5625e-05	1.5625e-05	1.66016e-05	7.8125e-06	2.34375e-05	1.46484e-05	1.5625e-05	7.32422e-06	-8.98437e-05	1.61133e-05	1.07422e-05	6.34766e-06	1.85547e-05	-4.88281e-06	-2.24609e-05	3.90625e-06	-1.26953e-05	4.88281e-06	4.88281e-06
-5.32227e-05	1.95313e-06	-1.46484e-06	-4.88281e-07	8.05664e-05	-1.2207e-05	-8.78906e-06	-4.88281e-06	-1.2207e-05	2.68555e-05	0.000174805	3.17383e-06	-1.5625e-05	5.85938e-06	2.05078e-05	1.36719e-05	1.75781e-05	7.8125e-06	1.5625e-05	5.37109e-06	1.75781e-05	7.8125e-06	1.5625e-05	5.37109e-06	2.49023e-05	1.5625e-05	-0.00012207	4.88281e-06	-9.76563e-07	1.5625e-05	1.46484e-05	1.66016e-05	8.30078e-06	2.14844e-05	1.66016e-05	1.5625e-05	7.8125e-06	-0.00012793	1.95313e-05	1.07422e-05	9.27734e-06	0.000128906	1.31836e-05	-1.36719e-05	-1.51367e-05	-3.71094e-05	4.10156e-05	-6.83594e-06
-7.17773e-05	-5.37109e-06	-4.39453e-06	-4.39453e-06	0	-4.88281e-06	1.95313e-06	-2.05078e-05	-7.32422e-06	-7.32422e-06	0.000276367	9.76563e-07	-0.000228516	6.83594e-06	1.85547e-05	1.2207e-05	1.66016e-05	7.32422e-06	1.5625e-05	9.27734e-06	1.66016e-05	7.32422e-06	1.5625e-05	9.27734e-06	2.19727e-05	1.12305e-05	-0.000263672	4.39453e-06	-4.88281e-07	1.66016e-05	1.36719e-05	1.66016e-05	8.78906e-06	1.75781e-05	1.46484e-05	1.66016e-05	7.8125e-06	0.000105469	2.88086e-05	1.17188e-05	-2.00195e-05	5.85937e-05	1.07422e-05	-2.14844e-05	5.37109e-06	-1.85547e-05	5.56641e-05	-2.92969e-06
-8.69141e-05	-2.44141e-06	-4.88281e-07	-1.95313e-06	-2.44141e-06	-1.46484e-05	-1.36719e-05	2.17285e-05	-1.46484e-05	-3.90625e-05	0.000152344	-1.17188e-05	-0.000276367	1.66016e-05	1.5625e-05	8.30078e-06	1.75781e-05	2.44141e-06	1.66016e-05	9.76563e-06	1.75781e-05	2.44141e-06	1.66016e-05	9.76563e-06	1.46484e-05	1.17188e-05	-0.000224609	8.30078e-06	3.41797e-06	1.75781e-05	1.46484e-05	1.66016e-05	8.78906e-06	1.85547e-05	1.5625e-05	1.75781e-05	6.34766e-06	8.10547e-05	1.5625e-05	1.26953e-05	-2.44141e-05	-0.000381836	1.41602e-05	-1.46484e-05	-1.17188e-05	-3.32031e-05	2.92969e-06	-9.76563e-06
-2.44141e-05	-1.2207e-05	-5.37109e-06	-4.88281e-06	9.76563e-06	-1.2207e-05	-3.90625e-06	1.97754e-05	-1.2207e-05	-2.68555e-05	-0.000142578	-1.07422e-05	-0.000110352	1.85547e-05	1.17188e-05	8.30078e-06	1.66016e-05	6.34766e-06	1.46484e-05	8.30078e-06	1.66016e-05	6.34766e-06	1.46484e-05	8.30078e-06	2.00195e-05	1.02539e-05	-0.000258789	1.5625e-05	4.39453e-06	1.5625e-05	1.46484e-05	1.66016e-05	8.78906e-06	1.66016e-05	1.85547e-05	1.75781e-05	5.85938e-06	5.46875e-05	-3.90625e-06	1.46484e-05	-4.54102e-05	-7.8125e-06	-4.39453e-06	-1.95313e-05	3.41797e-06	-1.75781e-05	-7.32422e-06	-3.90625e-06
7.76367e-05	-2.92969e-06	4.88281e-07	-1.95313e-06	2.44141e-05	-2.19727e-05	-1.75781e-05	4.88281e-07	-9.76563e-06	-3.17383e-05	-0.000216797	6.10352e-06	0.000166016	1.5625e-05	9.76563e-06	7.8125e-06	1.66016e-05	5.37109e-06	1.5625e-05	7.32422e-06	1.66016e-05	5.37109e-06	1.5625e-05	7.32422e-06	9.76563e-06	-4.88281e-07	-0.00017334	5.37109e-06	8.30078e-06	1.5625e-05	1.17188e-05	1.66016e-05	7.32422e-06	1.85547e-05	1.5625e-05	1.75781e-05	7.8125e-06	5.66406e-05	-9.27734e-06	1.5625e-05	-2.39258e-05	0.000171875	9.27734e-06	-1.26953e-05	-1.26953e-05	-2.83203e-05	-2.39258e-05	-1.17188e-05
0.000149414	0	-4.39453e-06	-3.90625e-06	-4.63867e-05	-1.2207e-05	-9.76563e-07	-8.54492e-06	-7.32422e-06	-0.000126953	-5.85937e-05	7.08008e-06	0.000178711	1.26953e-05	1.07422e-05	5.85938e-06	1.66016e-05	5.85938e-06	1.46484e-05	5.85938e-06	1.66016e-05	5.85938e-06	1.46484e-05	5.85938e-06	-3.80859e-05	-6.29883e-05	0.000307617	-5.66406e-05	8.78906e-06	1.5625e-05	1.26953e-05	1.36719e-05	8.30078e-06	1.5625e-05	1.75781e-05	1.5625e-05	5.85938e-06	0.000207031	-4.39453e-06	1.75781e-05	-1.70898e-05	-1.85547e-05	-1.95313e-06	-1.75781e-05	2.92969e-06	-4.88281e-06	2.92969e-05	-3.90625e-06
9.32617e-05	5.85938e-06	-4.88281e-07	4.88281e-07	-7.08008e-05	-1.95313e-05	-1.36719e-05	-1.09863e-05	-7.32422e-06	-3.41797e-05	-9.86328e-05	4.63867e-06	5.56641e-05	1.46484e-05	1.66016e-05	7.8125e-06	1.85547e-05	5.85938e-06	1.36719e-05	6.83594e-06	1.85547e-05	5.85938e-06	1.36719e-05	6.83594e-06	4.00391e-05	1.80664e-05	0.000932617	2.88086e-05	1.12305e-05	1.66016e-05	1.36719e-05	1.75781e-05	8.30078e-06	1.36719e-05	1.66016e-05	1.46484e-05	7.32422e-06	-3.90625e-06	7.32422e-06	1.95313e-05	1.02539e-05	0.000248047	9.76563e-07	-9.76563e-06	-1.02539e-05	-1.46484e-05	-4.19922e-05	-1.07422e-05
-7.42187e-05	-5.85938e-06	-5.37109e-06	-4.88281e-06	0.00013916	2.44141e-06	1.46484e-05	6.5918e-06	-9.76563e-06	3.17383e-05	3.61328e-05	7.32422e-07	9.66797e-05	1.36719e-05	1.75781e-05	9.27734e-06	1.66016e-05	9.27734e-06	1.46484e-05	6.83594e-06	1.66016e-05	9.27734e-06	1.46484e-05	6.83594e-06	3.80859e-05	2.24609e-05	0.000661621	2.58789e-05	1.36719e-05	1.5625e-05	1.36719e-05	1.75781e-05	8.30078e-06	1.07422e-05	1.5625e-05	1.36719e-05	8.78906e-06	-6.83594e-06	3.90625e-06	1.95313e-05	5.37109e-06	0.000279297	-1.07422e-05	-1.66016e-05	3.41797e-06	1.95313e-06	-0.000161133	-9.76563e-07
-9.375e-05	-2.92969e-06	-9.76563e-07	4.88281e-07	4.63867e-05	-4.88281e-06	-4.88281e-06	5.37109e-06	-9.76563e-06	6.5918e-05	-1.75781e-05	7.32422e-07	5.17578e-05	1.46484e-05	1.66016e-05	7.32422e-06	1.66016e-05	6.34766e-06	1.75781e-05	7.32422e-06	1.66016e-05	6.34766e-06	1.75781e-05	7.32422e-06	2.24609e-05	2.34375e-05	-7.08008e-05	1.75781e-05	1.31836e-05	1.36719e-05	1.26953e-05	1.5625e-05	7.8125e-06	9.76563e-06	1.17188e-05	1.46484e-05	7.32422e-06	-0.000142578	8.30078e-06	1.85547e-05	2.63672e-05	-5.85938e-06	1.46484e-06	-1.17188e-05	-1.31836e-05	-1.26953e-05	-0.000132813	-6.83594e-06
-6.93359e-05	-8.78906e-06	-2.44141e-06	-2.44141e-06	-0.000283203	-1.2207e-05	-6.83594e-06	-8.54492e-06	-7.32422e-06	4.88281e-05	-3.80859e-05	-1.2207e-06	-6.54297e-05	1.95313e-05	1.75781e-05	6.34766e-06	1.66016e-05	6.83594e-06	1.75781e-05	8.30078e-06	1.66016e-05	6.83594e-06	1.75781e-05	8.30078e-06	-1.51367e-05	2.09961e-05	-0.000375977	1.2207e-05	1.46484e-05	1.36719e-05	1.26953e-05	1.75781e-05	7.32422e-06	1.07422e-05	1.17188e-05	1.5625e-05	1.02539e-05	-0.0001875	3.75977e-05	1.5625e-05	1.46484e-06	-0.000714844	-5.37109e-06	-1.75781e-05	3.90625e-06	6.83594e-06	0.000142578	0
-3.71094e-05	-2.44141e-06	4.88281e-07	-9.76563e-07	-0.000336914	-2.92969e-05	-2.83203e-05	-1.85547e-05	-9.76563e-06	2.19727e-05	7.51953e-05	2.44141e-07	-0.000300781	2.24609e-05	1.75781e-05	9.76563e-07	1.66016e-05	6.34766e-06	1.66016e-05	8.78906e-06	1.66016e-05	6.34766e-06	1.66016e-05	8.78906e-06	-7.86133e-05	2.92969e-06	-0.000297852	-4.88281e-07	1.70898e-05	1.5625e-05	1.46484e-05	1.5625e-05	5.37109e-06	9.76563e-06	1.46484e-05	1.75781e-05	8.30078e-06	-3.125e-05	4.58984e-05	1.36719e-05	-9.76563e-07	-0.000344727	5.85938e-06	-1.07422e-05	-1.26953e-05	-6.83594e-06	0.000149902	-4.88281e-06
-2.68555e-05	-1.2207e-05	-4.88281e-06	-4.39453e-06	-0.000117187	-9.76563e-06	-5.85938e-06	-6.34766e-06	-9.76563e-06	-1.70898e-05	0.000321289	-9.76563e-07	4.39453e-05	2.05078e-05	1.46484e-05	-1.46484e-06	1.85547e-05	5.37109e-06	1.5625e-05	5.85938e-06	1.85547e-05	5.37109e-06	1.5625e-05	5.85938e-06	-6.25e-05	4.88281e-07	-0.000234375	1.46484e-06	1.75781e-05	1.66016e-05	9.76563e-06	1.66016e-05	9.76563e-07	8.78906e-06	1.36719e-05	1.66016e-05	9.76563e-06	0.000327148	2.63672e-05	1.46484e-05	-2.73438e-05	3.02734e-05	-6.34766e-06	-1.5625e-05	6.83594e-06	1.26953e-05	4.3457e-05	6.83594e-06
1.70898e-05	-9.76563e-06	0	-1.95313e-06	-1.46484e-05	-2.44141e-06	3.90625e-06	4.63867e-06	-1.2207e-05	-2.92969e-05	7.51953e-05	4.88281e-07	0.000266602	2.05078e-05	1.75781e-05	6.83594e-06	1.85547e-05	7.32422e-06	1.66016e-05	8.30078e-06	1.85547e-05	7.32422e-06	1.66016e-05	8.30078e-06	-2.7832e-05	6.83594e-06	-0.000153809	3.90625e-06	1.75781e-05	1.66016e-05	8.78906e-06	1.66016e-05	-4.88281e-07	8.78906e-06	1.26953e-05	1.75781e-05	1.2207e-05	0.000420898	-1.95313e-06	1.17188e-05	-1.9043e-05	0.000270508	4.88281e-07	-6.83594e-06	-9.76563e-06	-2.92969e-06	-1.41602e-05	-5.85938e-06
3.85742e-05	-1.41602e-05	-4.88281e-06	-5.37109e-06	8.54492e-05	2.44141e-06	1.46484e-05	5.12695e-06	-9.76563e-06	-4.15039e-05	-5.27344e-05	-1.70898e-06	8.30078e-05	1.26953e-05	1.5625e-05	2.44141e-06	2.05078e-05	5.37109e-06	1.46484e-05	9.27734e-06	2.05078e-05	5.37109e-06	1.46484e-05	9.27734e-06	-3.17383e-05	1.17188e-05	0.000246582	3.90625e-06	1.80664e-05	1.36719e-05	1.17188e-05	1.5625e-05	-4.88281e-07	8.78906e-06	1.46484e-05	1.5625e-05	1.07422e-05	-1.66016e-05	-1.02539e-05	1.17188e-05	-3.125e-05	0.000334961	-7.8125e-06	-1.46484e-05	5.85938e-06	1.17188e-05	1.46484e-05	-5.85938e-06
6.00586e-05	-4.88281e-06	1.46484e-06	0	2.44141e-05	-1.46484e-05	-5.85938e-06	-4.39453e-06	-9.76563e-06	7.32422e-06	2.83203e-05	2.44141e-07	5.37109e-05	1.95313e-05	2.14844e-05	8.78906e-06	2.83203e-05	6.83594e-06	1.36719e-05	9.76563e-06	2.83203e-05	6.83594e-06	1.36719e-05	9.76563e-06	-3.75977e-05	2.24609e-05	0.000634766	1.75781e-05	1.66016e-05	1.07422e-05	1.66016e-05	1.5625e-05	-4.88281e-07	6.83594e-06	2.92969e-06	1.66016e-05	9.27734e-06	-0.000240234	-4.88281e-06	1.26953e-05	-8.78906e-06	-0.000230469	7.8125e-06	-6.83594e-06	-1.17188e-05	-3.90625e-06	2.39258e-05	-9.76563e-06
8.64258e-05	-3.41797e-06	-4.88281e-06	-2.92969e-06	1.46484e-05	-4.88281e-06	5.85938e-06	-9.76563e-07	-7.32422e-06	2.44141e-06	-4.98047e-05	-3.90625e-06	0.000185547	1.26953e-05	2.34375e-05	1.61133e-05	3.51562e-05	1.02539e-05	1.66016e-05	8.78906e-06	3.51562e-05	1.02539e-05	1.66016e-05	8.78906e-06	-6.5918e-05	1.80664e-05	0.00026123	1.51367e-05	1.75781e-05	1.26953e-05	1.66016e-05	1.66016e-05	-2.44141e-06	9.76563e-06	-9.76563e-07	1.75781e-05	8.78906e-06	-9.17969e-05	8.78906e-06	1.5625e-05	-1.95313e-05	-0.000175781	-9.76563e-07	-9.76563e-06	3.90625e-06	1.26953e-05	-1.61133e-05	0
0.000111816	3.90625e-06	9.76563e-07	0	-4.88281e-06	-1.2207e-05	-6.83594e-06	-2.44141e-07	-9.76563e-06	4.88281e-06	-0.000128906	3.17383e-06	0.000332031	7.8125e-06	1.95313e-05	1.12305e-05	3.02734e-05	8.30078e-06	1.5625e-05	7.8125e-06	3.02734e-05	8.30078e-06	1.5625e-05	7.8125e-06	5.85938e-06	1.41602e-05	2.19727e-05	1.70898e-05	1.70898e-05	1.46484e-05	1.75781e-05	1.75781e-05	-1.46484e-06	6.83594e-06	1.66016e-05	1.75781e-05	6.34766e-06	0.000291016	1.80664e-05	1.5625e-05	3.41797e-06	-5.85938e-06	5.37109e-06	-4.88281e-06	-1.2207e-05	-9.76563e-07	-4.54102e-05	-9.76563e-06
0.000140137	6.34766e-06	-4.88281e-06	-3.90625e-06	2.68555e-05	-4.88281e-06	3.90625e-06	-1.2207e-06	-7.32422e-06	-1.2207e-05	-0.000288086	2.68555e-06	0.000259766	1.07422e-05	7.8125e-06	1.2207e-05	2.05078e-05	8.30078e-06	1.66016e-05	8.30078e-06	2.05078e-05	8.30078e-06	1.66016e-05	8.30078e-06	8.98437e-05	8.78906e-06	2.19727e-05	1.17188e-05	1.70898e-05	1.75781e-05	1.5625e-05	1.95313e-05	-9.76563e-07	7.8125e-06	3.51562e-05	1.66016e-05	6.83594e-06	0.000160156	2.34375e-05	1.85547e-05	-1.17188e-05	9.17969e-05	-1.07422e-05	-9.76563e-06	3.41797e-06	1.17188e-05	-1.12305e-05	-1.5625e-05
4.39453e-05	1.07422e-05	0	4.88281e-07	3.66211e-05	-1.46484e-05	-1.26953e-05	-4.88281e-06	-9.76563e-06	-2.44141e-05	-0.000146484	7.32422e-07	-6.25e-05	1.07422e-05	0	9.76563e-06	4.88281e-06	7.8125e-06	1.66016e-05	8.30078e-06	4.88281e-06	7.8125e-06	1.66016e-05	8.30078e-06	0.000101562	1.12305e-05	2.19727e-05	1.36719e-05	1.70898e-05	2.14844e-05	1.36719e-05	1.95313e-05	2.92969e-06	8.78906e-06	4.98047e-05	1.46484e-05	7.32422e-06	6.05469e-05	2.39258e-05	1.85547e-05	2.92969e-06	0.000186523	-1.46484e-06	-5.85938e-06	-1.41602e-05	-6.83594e-06	-1.66016e-05	3.90625e-05
-0.000132813	3.90625e-06	-6.34766e-06	-2.92969e-06	4.88281e-05	-4.88281e-06	1.95313e-06	-1.95313e-06	-1.2207e-05	-6.10352e-05	9.86328e-05	-1.51367e-05	-7.42187e-05	1.36719e-05	3.90625e-06	1.17188e-05	-6.83594e-06	8.30078e-06	1.5625e-05	7.8125e-06	-6.83594e-06	8.30078e-06	1.5625e-05	7.8125e-06	5.9082e-05	1.26953e-05	-4.63867e-05	1.61133e-05	1.5625e-05	2.14844e-05	1.26953e-05	1.5625e-05	6.34766e-06	8.78906e-06	4.29687e-05	1.26953e-05	1.02539e-05	-0.000132813	-5.85938e-06	1.46484e-05	-1.46484e-05	0.000108398	-8.30078e-06	-9.76563e-06	2.44141e-06	7.8125e-06	3.41797e-06	2.24609e-05
-0.000140625	8.30078e-06	-9.76563e-07	-9.76563e-07	4.88281e-06	-1.46484e-05	-1.36719e-05	-3.41797e-06	-9.76563e-06	-2.92969e-05	0.000168945	-7.32422e-06	-4.49219e-05	1.36719e-05	1.85547e-05	1.07422e-05	-5.85938e-06	7.8125e-06	1.5625e-05	6.83594e-06	-5.85938e-06	7.8125e-06	1.5625e-05	6.83594e-06	7.17773e-05	8.30078e-06	-0.000146484	9.76563e-06	1.5625e-05	2.34375e-05	1.36719e-05	1.26953e-05	6.83594e-06	8.78906e-06	1.07422e-05	1.36719e-05	7.8125e-06	-0.000196289	-1.9043e-05	1.95313e-05	6.34766e-06	-0.000186523	7.32422e-06	-2.92969e-06	-1.2207e-05	-8.78906e-06	-9.27734e-06	-8.78906e-06
-1.70898e-05	-8.30078e-06	-5.37109e-06	-5.37109e-06	-5.37109e-05	-7.32422e-06	9.76563e-07	4.63867e-06	-9.76563e-06	-7.32422e-06	4.39453e-05	7.32422e-07	-0.000179687	1.95313e-05	2.34375e-05	7.8125e-06	9.76563e-07	6.83594e-06	1.66016e-05	9.76563e-06	9.76563e-07	6.83594e-06	1.66016e-05	9.76563e-06	4.05273e-05	-8.78906e-06	-9.76563e-05	-8.30078e-06	1.26953e-05	2.14844e-05	1.46484e-05	1.46484e-05	8.30078e-06	7.8125e-06	1.07422e-05	2.83203e-05	5.85938e-06	-0.000175781	5.37109e-06	1.66016e-05	1.46484e-06	-0.000205078	-1.46484e-06	-8.78906e-06	2.92969e-06	0	-7.8125e-06	-1.26953e-05
5.95703e-05	-9.76563e-06	4.88281e-07	-9.76563e-07	-0.000112305	-1.46484e-05	-9.76563e-06	1.2207e-06	-9.76563e-06	1.46484e-05	-5.66406e-05	7.8125e-06	-0.000220703	2.24609e-05	1.95313e-05	7.32422e-06	5.85938e-06	6.83594e-06	1.75781e-05	1.17188e-05	5.85938e-06	6.83594e-06	1.75781e-05	1.17188e-05	-6.34766e-05	-5.0293e-05	-7.32422e-06	-4.29687e-05	1.36719e-05	1.07422e-05	1.5625e-05	1.17188e-05	1.31836e-05	7.8125e-06	1.75781e-05	4.29687e-05	6.34766e-06	0.000130859	2.00195e-05	1.36719e-05	5.37109e-06	-1.95313e-06	1.95313e-06	-9.76563e-07	-1.07422e-05	-1.5625e-05	-1.70898e-05	-5.46875e-05
-9.27734e-06	-1.70898e-05	-4.88281e-06	-4.39453e-06	-6.34766e-05	-9.76563e-06	1.95313e-06	-2.19727e-06	-7.32422e-06	4.88281e-06	-2.44141e-05	4.88281e-06	-5.76172e-05	2.14844e-05	1.85547e-05	5.85938e-06	1.17188e-05	1.02539e-05	1.66016e-05	9.27734e-06	1.17188e-05	1.02539e-05	1.66016e-05	9.27734e-06	1.66016e-05	3.80859e-05	0.00026123	4.19922e-05	1.36719e-05	9.76563e-06	1.5625e-05	1.17188e-05	1.5625e-05	7.8125e-06	2.53906e-05	1.36719e-05	9.27734e-06	2.24609e-05	2.05078e-05	1.66016e-05	-9.76563e-06	0.000253906	-1.5625e-05	-7.8125e-06	4.39453e-06	-1.95313e-06	1.12305e-05	-8.39844e-05
-4.73633e-05	-1.5625e-05	0	-9.76563e-07	1.2207e-05	-7.32422e-06	0	1.46484e-06	-7.32422e-06	4.88281e-06	4.6875e-05	4.88281e-06	-0.000131836	2.05078e-05	1.75781e-05	5.85938e-06	1.66016e-05	9.27734e-06	1.75781e-05	9.27734e-06	1.66016e-05	9.27734e-06	1.75781e-05	9.27734e-06	1.46484e-06	2.92969e-05	0.000161133	2.88086e-05	1.2207e-05	2.44141e-05	1.66016e-05	1.5625e-05	1.5625e-05	7.8125e-06	-8.20313e-05	-6.73828e-05	1.12305e-05	-5.95703e-05	1.75781e-05	1.66016e-05	-1.46484e-05	0.000373047	-8.78906e-06	-1.95313e-06	-1.12305e-05	-1.95313e-05	4.39453e-06	-9.66797e-05
-5.51758e-05	-3.22266e-05	-4.88281e-06	-4.88281e-06	4.88281e-06	0	6.83594e-06	1.46484e-06	-7.32422e-06	-4.88281e-06	-8.00781e-05	-2.44141e-07	-0.00021875	1.95313e-05	1.36719e-05	5.37109e-06	1.36719e-05	9.76563e-06	1.66016e-05	1.07422e-05	1.36719e-05	9.76563e-06	1.66016e-05	1.07422e-05	1.5625e-05	1.51367e-05	3.41797e-05	2.19727e-05	1.17188e-05	2.73438e-05	1.5625e-05	1.5625e-05	1.75781e-05	1.17188e-05	-4.49219e-05	-1.5625e-05	1.02539e-05	-2.14844e-05	-3.80859e-05	1.66016e-05	-2.58789e-05	8.78906e-05	-1.51367e-05	-8.78906e-06	4.39453e-06	-4.88281e-06	2.09961e-05	-0.000116211
-6.29883e-05	-1.95313e-05	-4.88281e-07	4.88281e-07	1.70898e-05	-3.41797e-05	-3.90625e-05	-9.76563e-06	-4.88281e-06	-2.44141e-06	-6.34766e-05	-2.44141e-07	-0.000196289	1.75781e-05	1.5625e-05	5.37109e-06	1.75781e-05	1.12305e-05	1.46484e-05	9.76563e-06	1.75781e-05	1.12305e-05	1.46484e-05	9.76563e-06	1.12305e-05	1.36719e-05	6.34766e-05	1.5625e-05	1.12305e-05	1.75781e-05	1.66016e-05	1.75781e-05	1.61133e-05	8.78906e-06	2.05078e-05	9.76563e-07	1.02539e-05	-0.000161133	-5.46875e-05	1.75781e-05	-1.95313e-06	-0.000210937	-1.02539e-05	-9.76563e-07	-1.2207e-05	-2.05078e-05	1.61133e-05	0.00018457
-3.07617e-05	1.95313e-06	-4.88281e-06	-5.85938e-06	-4.63867e-05	-2.19727e-05	-1.95313e-05	-6.5918e-06	-7.32422e-06	-1.2207e-05	-9.76563e-06	-1.70898e-06	-4.49219e-05	1.95313e-05	1.85547e-05	1.95313e-06	1.95313e-05	1.02539e-05	1.75781e-05	8.30078e-06	1.95313e-05	1.02539e-05	1.75781e-05	8.30078e-06	-1.46484e-05	5.85938e-06	1.2207e-05	9.27734e-06	1.07422e-05	8.78906e-06	1.36719e-05	1.85547e-05	1.66016e-05	1.07422e-05	5.37109e-05	3.90625e-06	9.76563e-06	-8.30078e-05	1.61133e-05	1.26953e-05	-1.85547e-05	-0.000189453	-2.24609e-05	-5.85938e-06	9.76563e-07	-4.88281e-06	3.90625e-05	0.000178711
5.0293e-05	2.00195e-05	-9.76563e-07	-1.95313e-06	-0.000109863	-1.95313e-05	-2.05078e-05	-5.61523e-06	-1.46484e-05	-7.32422e-06	3.22266e-05	-1.46484e-06	9.08203e-05	8.78906e-06	1.17188e-05	-1.46484e-06	2.14844e-05	9.76563e-06	1.5625e-05	8.78906e-06	2.14844e-05	9.76563e-06	1.5625e-05	8.78906e-06	-2.34375e-05	2.44141e-06	-0.000107422	1.12305e-05	1.12305e-05	1.95313e-06	1.07422e-05	1.85547e-05	1.02539e-05	9.76563e-06	4.78516e-05	7.22656e-05	7.8125e-06	3.90625e-06	6.44531e-05	1.36719e-05	3.41797e-06	-4.00391e-05	-1.26953e-05	-9.76563e-07	-1.31836e-05	-2.05078e-05	1.51367e-05	9.76563e-07
6.64063e-05	5.85938e-06	-4.88281e-06	-3.90625e-06	-7.08008e-05	1.2207e-05	2.24609e-05	4.39453e-06	-1.2207e-05	-2.19727e-05	2.24609e-05	-2.92969e-06	0.000186523	1.95313e-05	1.5625e-05	8.78906e-06	1.95313e-05	1.02539e-05	1.66016e-05	7.8125e-06	1.95313e-05	1.02539e-05	1.66016e-05	7.8125e-06	-2.09961e-05	4.88281e-07	-9.0332e-05	1.02539e-05	5.37109e-06	4.88281e-06	9.76563e-06	1.66016e-05	8.78906e-06	7.8125e-06	6.93359e-05	0.00015625	8.78906e-06	0.000226563	3.4668e-05	1.66016e-05	1.95313e-06	-0.000254883	0	-6.83594e-06	3.90625e-06	-5.85938e-06	6.34766e-06	-0.000143555
1.26953e-05	5.37109e-06	-4.88281e-07	2.44141e-06	-4.15039e-05	0	3.90625e-06	2.19727e-06	-9.76563e-06	-2.44141e-06	2.92969e-05	-2.19727e-06	0.000220703	2.53906e-05	1.5625e-05	7.32422e-06	2.63672e-05	7.8125e-06	1.66016e-05	6.34766e-06	2.63672e-05	7.8125e-06	1.66016e-05	6.34766e-06	-1.2207e-05	8.78906e-06	0.000168457	1.51367e-05	6.83594e-06	1.5625e-05	1.5625e-05	1.66016e-05	1.26953e-05	1.07422e-05	5.85937e-05	4.29687e-05	1.12305e-05	0.000301758	3.4668e-05	1.75781e-05	2.14844e-05	-0.000261719	3.90625e-05	9.76563e-07	-1.26953e-05	-1.95313e-05	-1.51367e-05	-3.125e-05
-1.36719e-05	1.46484e-06	-4.88281e-06	-2.92969e-06	-7.32422e-06	0	1.07422e-05	2.68555e-06	-9.76563e-06	2.19727e-05	3.32031e-05	-2.44141e-06	0.000146484	2.24609e-05	1.75781e-05	1.2207e-05	3.02734e-05	1.02539e-05	1.5625e-05	9.27734e-06	3.02734e-05	1.02539e-05	1.5625e-05	9.27734e-06	-1.2207e-05	1.36719e-05	8.05664e-05	1.46484e-05	8.30078e-06	1.5625e-05	1.85547e-05	1.75781e-05	1.36719e-05	8.78906e-06	8.78906e-06	-0.000125977	1.17188e-05	0.00015332	3.71094e-05	1.75781e-05	1.2207e-05	-5.85938e-06	4.88281e-07	-4.88281e-06	7.32422e-06	-1.95313e-06	-1.95313e-06	5.46875e-05
-2.34375e-05	2.92969e-06	0	-1.46484e-06	2.68555e-05	-9.76563e-06	-6.83594e-06	7.32422e-07	-9.76563e-06	7.32422e-06	-7.8125e-06	-1.70898e-06	-6.54297e-05	1.66016e-05	2.05078e-05	1.66016e-05	2.44141e-05	8.30078e-06	1.46484e-05	7.32422e-06	2.44141e-05	8.30078e-06	1.46484e-05	7.32422e-06	-1.5625e-05	1.12305e-05	-0.000163574	8.78906e-06	1.02539e-05	1.66016e-05	1.85547e-05	1.75781e-05	1.26953e-05	1.17188e-05	-2.34375e-05	-0.000118164	8.30078e-06	6.83594e-06	1.75781e-05	1.85547e-05	1.26953e-05	0.000207031	-8.30078e-06	1.95313e-06	-1.12305e-05	-1.66016e-05	-1.66016e-05	-6.25e-05
4.6875e-05	-4.39453e-06	-4.88281e-06	-4.39453e-06	7.32422e-05	-2.44141e-06	4.88281e-06	2.44141e-07	-9.76563e-06	1.70898e-05	-2.14844e-05	2.44141e-06	-0.000251953	1.5625e-05	1.95313e-05	1.36719e-05	1.36719e-05	8.78906e-06	1.5625e-05	5.85938e-06	1.36719e-05	8.78906e-06	1.5625e-05	5.85938e-06	-1.5625e-05	1.31836e-05	-0.000292969	8.30078e-06	7.32422e-06	2.05078e-05	1.75781e-05	1.5625e-05	9.76563e-06	1.07422e-05	1.36719e-05	3.02734e-05	7.32422e-06	-6.54297e-05	-5.85938e-06	1.75781e-05	-1.36719e-05	0.000166016	-2.7832e-05	-4.88281e-06	1.95313e-06	-2.92969e-06	-1.95313e-06	-4.19922e-05
6.05469e-05	-4.88281e-06	-9.76563e-07	-4.88281e-07	8.30078e-05	-1.2207e-05	-1.07422e-05	-3.66211e-06	-7.32422e-06	-9.76563e-06	-4.6875e-05	3.66211e-06	-6.44531e-05	1.66016e-05	1.85547e-05	1.26953e-05	1.95313e-06	9.27734e-06	1.75781e-05	6.34766e-06	1.95313e-06	9.27734e-06	1.75781e-05	6.34766e-06	1.2207e-05	9.76563e-06	0.000187988	8.78906e-06	8.78906e-06	2.14844e-05	1.5625e-05	1.66016e-05	9.27734e-06	1.07422e-05	8.98437e-05	4.6875e-05	9.27734e-06	-6.83594e-06	-5.85938e-06	1.36719e-05	-9.76563e-07	0.000178711	-1.75781e-05	0	-1.17188e-05	-1.85547e-05	-9.27734e-06	-0.000128906
-4.24805e-05	-1.61133e-05	-7.32422e-06	-3.41797e-06	4.88281e-05	-9.76563e-06	0	-3.17383e-06	-9.76563e-06	-0.000185547	-3.125e-05	-3.90625e-06	0.000206055	1.5625e-05	1.95313e-05	1.12305e-05	-1.26953e-05	1.02539e-05	1.66016e-05	6.34766e-06	-1.26953e-05	1.02539e-05	1.66016e-05	6.34766e-06	8.54492e-05	9.27734e-06	0.000541992	7.32422e-06	7.32422e-06	2.14844e-05	1.66016e-05	1.75781e-05	1.17188e-05	1.36719e-05	0.000135742	4.88281e-05	8.30078e-06	1.75781e-05	-7.8125e-06	1.46484e-05	-1.70898e-05	0.000155273	-1.66016e-05	-4.88281e-06	5.85938e-06	-2.92969e-06	0	1.17188e-05
-0.000156738	-1.95313e-06	-9.76563e-07	-4.88281e-07	-0.000166016	-1.70898e-05	-1.66016e-05	-4.39453e-06	-9.76563e-06	-0.000336914	0.000273438	-1.02539e-05	0.000175781	1.17188e-05	1.66016e-05	1.12305e-05	-9.76563e-07	6.83594e-06	1.95313e-05	8.30078e-06	-9.76563e-07	6.83594e-06	1.95313e-05	8.30078e-06	8.83789e-05	1.70898e-05	0.000534668	1.66016e-05	8.78906e-06	1.75781e-05	1.66016e-05	1.66016e-05	5.85938e-06	1.17188e-05	3.90625e-06	0.000112305	7.32422e-06	-2.53906e-05	-4.88281e-07	1.66016e-05	1.46484e-06	1.95313e-05	2.05078e-05	-1.95313e-06	-8.30078e-06	-1.75781e-05	-1.36719e-05	0.000262695
-9.81445e-05	-2.92969e-06	-5.85938e-06	-4.88281e-06	-3.41797e-05	-9.76563e-06	-2.92969e-06	-1.95313e-06	-9.76563e-06	3.90625e-05	0.000341797	-6.10352e-06	6.15234e-05	1.5625e-05	1.36719e-05	6.83594e-06	1.17188e-05	9.27734e-06	1.5625e-05	7.8125e-06	1.17188e-05	9.27734e-06	1.5625e-05	7.8125e-06	2.73438e-05	7.8125e-06	0.00026123	3.41797e-06	8.30078e-06	1.66016e-05	1.5625e-05	1.36719e-05	-4.88281e-07	1.26953e-05	-0.000129883	0.000137695	5.85938e-06	-1.95313e-06	2.44141e-06	1.66016e-05	-9.27734e-06	-5.85937e-05	-4.39453e-06	-8.78906e-06	7.32422e-06	-6.83594e-06	-6.34766e-06	0.00019043
0.000115234	2.44141e-06	4.88281e-07	9.76563e-07	7.32422e-05	-1.70898e-05	-1.46484e-05	-2.44141e-06	-4.88281e-06	0.000249023	8.10547e-05	7.8125e-06	-3.02734e-05	1.66016e-05	1.5625e-05	4.88281e-06	2.34375e-05	1.02539e-05	1.36719e-05	1.07422e-05	2.34375e-05	1.02539e-05	1.36719e-05	1.07422e-05	-1.66016e-05	-4.39453e-05	-0.000170898	-5.0293e-05	9.76563e-06	1.75781e-05	1.5625e-05	1.5625e-05	-9.76563e-07	1.17188e-05	-3.90625e-05	9.76563e-06	5.85938e-06	-0.00012793	2.92969e-06	1.75781e-05	1.31836e-05	-0.000141602	-1.17188e-05	2.92969e-06	-8.78906e-06	-2.24609e-05	-1.70898e-05	-0.000134766
0.000125488	-6.83594e-06	-6.34766e-06	-3.90625e-06	-0.000109863	-7.32422e-06	-3.90625e-06	-4.88281e-07	-4.88281e-06	0.000214844	-7.71484e-05	3.17383e-06	-4.49219e-05	1.75781e-05	1.66016e-05	4.88281e-06	2.92969e-05	9.76563e-06	1.5625e-05	9.27734e-06	2.92969e-05	9.76563e-06	1.5625e-05	9.27734e-06	2.7832e-05	5.85938e-06	-0.000515137	1.07422e-05	7.32422e-06	1.66016e-05	1.75781e-05	1.46484e-05	2.92969e-06	1.26953e-05	-2.83203e-05	-3.90625e-06	5.85938e-06	-6.44531e-05	9.76563e-07	1.75781e-05	-3.90625e-06	-5.07812e-05	-1.51367e-05	-5.85938e-06	7.32422e-06	-6.83594e-06	4.88281e-07	-0.000117187
0.000119629	9.76563e-07	-4.88281e-07	4.88281e-07	-4.88281e-06	-7.32422e-06	0	7.32422e-07	-4.88281e-06	1.70898e-05	-8.78906e-05	2.92969e-06	-1.66016e-05	1.75781e-05	1.75781e-05	2.92969e-06	2.05078e-05	1.02539e-05	1.5625e-05	7.8125e-06	2.05078e-05	1.02539e-05	1.5625e-05	7.8125e-06	6.68945e-05	2.39258e-05	-0.000605469	2.44141e-05	6.34766e-06	1.46484e-05	1.66016e-05	1.5625e-05	7.8125e-06	1.26953e-05	-4.39453e-05	-0.000143555	6.34766e-06	-6.64063e-05	4.88281e-07	1.66016e-05	4.88281e-06	1.36719e-05	1.85547e-05	-9.76563e-07	-8.78906e-06	-2.24609e-05	-9.76563e-07	-0.000110352
2.34375e-05	-3.90625e-06	-3.41797e-06	-4.88281e-06	9.52148e-05	2.44141e-06	8.78906e-06	2.68555e-06	-9.76563e-06	-0.000126953	-0.000264648	0	-3.51562e-05	2.24609e-05	1.85547e-05	5.85938e-06	7.8125e-06	1.07422e-05	1.75781e-05	1.02539e-05	7.8125e-06	1.07422e-05	1.75781e-05	1.02539e-05	4.58984e-05	2.24609e-05	-3.90625e-05	2.44141e-05	6.83594e-06	1.46484e-05	1.75781e-05	1.46484e-05	1.75781e-05	1.36719e-05	1.07422e-05	-0.000111328	9.27734e-06	3.71094e-05	1.95313e-06	1.75781e-05	-1.70898e-05	1.95313e-05	2.49023e-05	-9.76563e-06	4.88281e-06	-5.85938e-06	7.8125e-06	-7.12891e-05
-3.02734e-05	-3.90625e-06	-9.76563e-07	-1.46484e-06	6.83594e-05	-1.46484e-05	-9.76563e-06	-1.46484e-06	-9.76563e-06	-7.56836e-05	-0.000227539	1.70898e-06	-5.07812e-05	2.24609e-05	1.95313e-05	8.78906e-06	9.76563e-06	8.78906e-06	1.75781e-05	1.07422e-05	9.76563e-06	8.78906e-06	1.75781e-05	1.07422e-05	1.70898e-05	1.85547e-05	0.000368652	2.39258e-05	6.83594e-06	1.5625e-05	1.5625e-05	1.5625e-05	2.05078e-05	1.26953e-05	-3.125e-05	4.49219e-05	1.17188e-05	3.41797e-05	0	1.85547e-05	5.85938e-06	4.88281e-06	8.30078e-06	-9.76563e-07	-1.12305e-05	-2.24609e-05	-2.34375e-05	-3.41797e-05
1.51367e-05	-1.07422e-05	-4.88281e-06	-4.88281e-06	9.0332e-05	-1.95313e-05	-1.75781e-05	-9.52148e-06	-7.32422e-06	-3.90625e-05	-0.000129883	-7.32422e-07	-4.78516e-05	1.95313e-05	1.75781e-05	5.85938e-06	1.26953e-05	8.78906e-06	1.66016e-05	7.32422e-06	1.26953e-05	8.78906e-06	1.66016e-05	7.32422e-06	7.8125e-06	8.30078e-06	0.000153809	1.31836e-05	6.83594e-06	1.66016e-05	1.66016e-05	1.75781e-05	1.70898e-05	1.17188e-05	2.83203e-05	6.64063e-05	8.78906e-06	9.27734e-05	7.32422e-06	1.66016e-05	-2.44141e-06	-9.76563e-07	-1.61133e-05	-5.85938e-06	2.44141e-06	-5.85938e-06	-2.44141e-05	0.000102539
-1.46484e-05	1.46484e-06	4.88281e-07	-4.88281e-07	8.30078e-05	-2.44141e-05	-2.44141e-05	-7.32422e-06	-1.2207e-05	2.68555e-05	-0.000151367	-4.88281e-07	-1.26953e-05	9.76563e-06	1.46484e-05	2.44141e-06	1.17188e-05	9.27734e-06	1.5625e-05	7.32422e-06	1.17188e-05	9.27734e-06	1.5625e-05	7.32422e-06	-4.88281e-07	2.44141e-06	-4.63867e-05	5.85938e-06	7.32422e-06	1.5625e-05	1.66016e-05	1.66016e-05	1.75781e-05	1.36719e-05	6.73828e-05	6.44531e-05	6.83594e-06	0.000225586	8.30078e-06	1.5625e-05	3.41797e-06	8.78906e-06	6.34766e-06	0	-1.02539e-05	-1.66016e-05	-3.41797e-05	0.000129883
-9.17969e-05	-8.30078e-06	-5.37109e-06	-3.90625e-06	6.83594e-05	0	8.78906e-06	3.41797e-06	-9.76563e-06	4.63867e-05	4.19922e-05	-2.92969e-06	-2.34375e-05	5.85938e-06	1.66016e-05	3.41797e-06	2.14844e-05	8.30078e-06	1.5625e-05	7.8125e-06	2.14844e-05	8.30078e-06	1.5625e-05	7.8125e-06	-7.32422e-06	3.41797e-06	-0.000571289	5.85938e-06	7.8125e-06	1.66016e-05	1.66016e-05	1.5625e-05	2.34375e-05	1.66016e-05	7.91016e-05	6.64063e-05	1.02539e-05	0.000294922	5.85938e-06	1.85547e-05	-2.92969e-06	3.71094e-05	-5.37109e-06	-3.90625e-06	6.34766e-06	9.76563e-07	-2.88086e-05	-4.88281e-05
-8.69141e-05	-1.17188e-05	-9.76563e-07	-9.76563e-07	5.12695e-05	-2.44141e-06	9.76563e-07	3.90625e-06	-7.32422e-06	9.27734e-05	0.000259766	-2.19727e-06	0.000146484	1.5625e-05	1.36719e-05	6.34766e-06	2.05078e-05	7.32422e-06	1.66016e-05	8.30078e-06	2.05078e-05	7.32422e-06	1.66016e-05	8.30078e-06	-6.83594e-06	6.34766e-06	-0.000795898	4.39453e-06	4.39453e-06	1.66016e-05	1.66016e-05	1.66016e-05	2.73438e-05	1.5625e-05	6.73828e-05	5.66406e-05	1.36719e-05	7.61719e-05	3.90625e-06	1.66016e-05	2.49023e-05	9.86328e-05	1.95313e-06	4.88281e-06	-1.07422e-05	-1.46484e-05	-2.92969e-05	-0.000138672
-5.17578e-05	-1.02539e-05	-4.88281e-06	-4.88281e-06	3.66211e-05	2.44141e-06	1.26953e-05	5.12695e-06	-7.32422e-06	2.19727e-05	0.00040625	-1.70898e-06	0.000255859	1.95313e-05	1.66016e-05	8.30078e-06	1.85547e-05	8.78906e-06	1.66016e-05	7.8125e-06	1.85547e-05	8.78906e-06	1.66016e-05	7.8125e-06	7.8125e-06	1.70898e-05	-0.000280762	1.46484e-05	4.88281e-06	1.85547e-05	1.5625e-05	1.66016e-05	2.83203e-05	1.5625e-05	5.27344e-05	2.53906e-05	8.30078e-06	-0.000147461	8.30078e-06	1.36719e-05	1.70898e-05	-9.96094e-05	-8.78906e-06	-9.76563e-07	5.85938e-06	-9.76563e-07	5.37109e-06	-0.000114258
-1.17188e-05	2.92969e-06	0	9.76563e-07	2.19727e-05	-9.76563e-06	-5.85938e-06	1.2207e-06	-9.76563e-06	-5.61523e-05	0.000117187	-2.44141e-07	0.000119141	5.85938e-06	1.75781e-05	1.51367e-05	2.14844e-05	6.83594e-06	1.66016e-05	8.78906e-06	2.14844e-05	6.83594e-06	1.66016e-05	8.78906e-06	1.41602e-05	1.70898e-05	0.00107178	1.5625e-05	8.78906e-06	1.75781e-05	1.75781e-05	1.75781e-05	2.83203e-05	1.36719e-05	9.47266e-05	1.46484e-05	5.85938e-06	-0.000124023	1.95313e-05	1.46484e-05	7.32422e-06	-2.44141e-05	3.90625e-06	4.88281e-06	-1.07422e-05	-1.75781e-05	1.80664e-05	-1.26953e-05
1.46484e-06	-9.76563e-07	-5.37109e-06	-2.92969e-06	7.32422e-06	-4.88281e-06	4.88281e-06	7.32422e-07	-9.76563e-06	-5.37109e-05	-9.76563e-05	-1.2207e-06	-1.95313e-05	1.17188e-05	1.95313e-05	1.61133e-05	2.24609e-05	7.32422e-06	1.66016e-05	8.78906e-06	2.24609e-05	7.32422e-06	1.66016e-05	8.78906e-06	7.32422e-06	1.2207e-05	0.00125244	1.07422e-05	8.30078e-06	1.5625e-05	1.75781e-05	1.75781e-05	2.63672e-05	1.5625e-05	8.69141e-05	-1.26953e-05	5.85938e-06	-6.73828e-05	2.19727e-05	1.85547e-05	-1.75781e-05	-0.000185547	-7.32422e-06	-2.92969e-06	5.37109e-06	-2.92969e-06	3.56445e-05	0.000176758
2.49023e-05	3.41797e-06	-1.95313e-06	-4.88281e-07	-4.88281e-06	-1.46484e-05	-1.17188e-05	-1.70898e-06	-1.2207e-05	2.92969e-05	-0.00024707	3.41797e-06	-0.000179687	1.85547e-05	1.75781e-05	1.41602e-05	2.63672e-05	8.78906e-06	1.5625e-05	9.76563e-06	2.63672e-05	8.78906e-06	1.5625e-05	9.76563e-06	4.88281e-07	1.26953e-05	0.000844727	6.34766e-06	5.37109e-06	1.46484e-05	1.66016e-05	1.5625e-05	2.05078e-05	1.5625e-05	-8.69141e-05	-3.22266e-05	4.39453e-06	4.6875e-05	1.36719e-05	2.05078e-05	-1.36719e-05	-0.000142578	8.30078e-06	1.95313e-06	-1.2207e-05	-1.5625e-05	-5.37109e-06	0.000170898
2.7832e-05	-5.37109e-06	-6.34766e-06	-3.90625e-06	2.44141e-06	-4.88281e-06	2.92969e-06	7.32422e-07	-9.76563e-06	-2.44141e-06	-0.000111328	4.88281e-07	-0.00022168	1.26953e-05	1.36719e-05	1.07422e-05	3.125e-05	7.8125e-06	1.5625e-05	8.78906e-06	3.125e-05	7.8125e-06	1.5625e-05	8.78906e-06	4.88281e-07	1.31836e-05	0.000249023	6.83594e-06	5.37109e-06	1.36719e-05	1.5625e-05	1.5625e-05	1.31836e-05	1.5625e-05	-0.000102539	4.88281e-06	3.41797e-06	2.63672e-05	1.12305e-05	1.66016e-05	-3.02734e-05	4.78516e-05	-1.95313e-06	-5.85938e-06	5.37109e-06	9.76563e-07	-1.46484e-05	5.37109e-05
7.66602e-05	-3.41797e-06	4.88281e-07	-1.46484e-06	7.32422e-06	-1.2207e-05	-1.17188e-05	-2.92969e-06	-1.46484e-05	-6.5918e-05	8.78906e-06	-1.19629e-05	-0.000131836	1.5625e-05	1.26953e-05	9.76563e-06	2.53906e-05	7.8125e-06	1.5625e-05	7.32422e-06	2.53906e-05	7.8125e-06	1.5625e-05	7.32422e-06	4.88281e-06	1.5625e-05	-0.000551758	1.07422e-05	4.88281e-06	1.5625e-05	1.66016e-05	1.66016e-05	1.2207e-05	1.66016e-05	-4.00391e-05	1.85547e-05	4.88281e-06	0.000123047	5.37109e-06	1.5625e-05	-2.14844e-05	0.000203125	-2.92969e-06	-9.76563e-07	-1.02539e-05	-9.76563e-06	-5.85938e-06	-5.85938e-06
4.15039e-05	-8.30078e-06	-1.95313e-06	-6.34766e-06	2.44141e-06	-9.76563e-06	-1.95313e-06	-1.46484e-06	-1.2207e-05	7.32422e-06	9.27734e-05	-8.54492e-06	-4.6875e-05	2.14844e-05	1.75781e-05	8.30078e-06	2.05078e-05	1.02539e-05	1.5625e-05	5.37109e-06	2.05078e-05	1.02539e-05	1.5625e-05	5.37109e-06	7.8125e-06	1.9043e-05	-0.000612793	1.36719e-05	6.83594e-06	1.75781e-05	1.5625e-05	1.5625e-05	9.27734e-06	1.46484e-05	9.96094e-05	2.92969e-05	6.83594e-06	0.000118164	2.44141e-06	2.24609e-05	-2.58789e-05	0.000101562	-2.97852e-05	-8.78906e-06	4.39453e-06	9.76563e-07	1.70898e-05	-0.000139648
-5.27344e-05	-1.95313e-06	1.46484e-06	-1.95313e-06	-7.32422e-06	-1.46484e-05	-1.36719e-05	-2.92969e-06	-9.76563e-06	-5.37109e-05	-0.000195313	1.70898e-06	6.83594e-05	2.14844e-05	2.24609e-05	7.32422e-06	2.24609e-05	1.17188e-05	1.66016e-05	6.34766e-06	2.24609e-05	1.17188e-05	1.66016e-05	6.34766e-06	-8.78906e-06	2.92969e-06	-0.000615234	0	8.30078e-06	1.66016e-05	1.46484e-05	1.75781e-05	6.83594e-06	9.76563e-06	0.000146484	3.51562e-05	5.37109e-06	-1.36719e-05	-1.07422e-05	2.14844e-05	5.85938e-06	2.44141e-05	0	0	-7.8125e-06	-1.5625e-05	-3.90625e-06	-7.8125e-06
-0.000132324	-3.41797e-06	-3.90625e-06	-3.41797e-06	0	-7.32422e-06	0	-9.76563e-07	-4.88281e-06	-2.68555e-05	-0.000277344	6.83594e-06	0.000129883	1.75781e-05	2.53906e-05	9.27734e-06	2.14844e-05	9.76563e-06	1.75781e-05	6.83594e-06	2.14844e-05	9.76563e-06	1.75781e-05	6.83594e-06	-8.64258e-05	-7.91016e-05	-0.000197754	-8.44727e-05	8.78906e-06	1.5625e-05	1.75781e-05	1.66016e-05	2.92969e-06	8.78906e-06	-6.25e-05	3.125e-05	4.39453e-06	-7.32422e-05	-1.31836e-05	2.05078e-05	-9.76563e-07	4.58984e-05	3.41797e-06	-8.78906e-06	5.85938e-06	-4.88281e-06	-1.07422e-05	6.34766e-05
-0.000130859	2.92969e-06	0	9.76563e-07	7.32422e-06	-1.70898e-05	-1.75781e-05	-4.39453e-06	-7.32422e-06	9.27734e-05	-0.0001875	5.37109e-06	9.57031e-05	1.66016e-05	2.44141e-05	6.83594e-06	1.85547e-05	1.07422e-05	1.5625e-05	5.85938e-06	1.85547e-05	1.07422e-05	1.5625e-05	5.85938e-06	1.61133e-05	3.36914e-05	3.17383e-05	3.4668e-05	6.83594e-06	1.5625e-05	1.5625e-05	1.5625e-05	0	1.36719e-05	-3.71094e-05	2.53906e-05	7.32422e-06	5.66406e-05	-4.88281e-07	1.95313e-05	1.61133e-05	-4.29687e-05	2.05078e-05	-1.95313e-06	-1.31836e-05	-1.85547e-05	-2.73438e-05	7.22656e-05
-0.00011084	-6.34766e-06	-3.90625e-06	-2.92969e-06	9.76563e-06	2.44141e-06	1.07422e-05	3.17383e-06	-9.76563e-06	9.27734e-05	-7.71484e-05	1.46484e-06	4.78516e-05	1.5625e-05	1.85547e-05	7.32422e-06	1.95313e-05	7.32422e-06	1.5625e-05	7.8125e-06	1.95313e-05	7.32422e-06	1.5625e-05	7.8125e-06	1.51367e-05	2.53906e-05	0.000180664	2.88086e-05	8.78906e-06	1.66016e-05	1.5625e-05	1.5625e-05	-4.88281e-07	1.46484e-05	1.5625e-05	2.24609e-05	7.8125e-06	0.000161133	1.36719e-05	1.75781e-05	3.90625e-06	1.46484e-05	1.61133e-05	-1.17188e-05	2.92969e-06	-1.95313e-06	-3.27148e-05	4.88281e-06
-1.46484e-05	-7.8125e-06	-9.76563e-07	4.88281e-07	9.76563e-06	-9.76563e-06	-5.85938e-06	-2.44141e-07	-9.76563e-06	1.95313e-05	3.32031e-05	1.2207e-06	4.58984e-05	1.85547e-05	4.88281e-06	5.85938e-06	1.95313e-05	8.30078e-06	1.66016e-05	1.02539e-05	1.95313e-05	8.30078e-06	1.66016e-05	1.02539e-05	1.12305e-05	1.95313e-05	-6.10352e-05	2.05078e-05	8.30078e-06	1.66016e-05	1.75781e-05	1.46484e-05	-1.46484e-06	1.36719e-05	1.75781e-05	1.5625e-05	1.02539e-05	0.000231445	4.58984e-05	1.75781e-05	4.39453e-06	7.22656e-05	8.30078e-06	-7.8125e-06	-1.17188e-05	-1.36719e-05	-5.95703e-05	-9.76563e-05
0.000104004	-1.2207e-05	-5.85938e-06	-3.41797e-06	7.32422e-06	-1.70898e-05	-1.26953e-05	-5.85938e-06	-7.32422e-06	-8.78906e-05	-3.90625e-06	0	3.41797e-05	1.95313e-05	0	4.88281e-06	1.95313e-05	8.30078e-06	1.5625e-05	9.76563e-06	1.95313e-05	8.30078e-06	1.5625e-05	9.76563e-06	1.61133e-05	1.75781e-05	-0.00041748	1.95313e-05	5.85938e-06	1.5625e-05	1.66016e-05	1.75781e-05	0	1.46484e-05	9.76563e-06	1.46484e-05	8.78906e-06	-0.000200195	5.51758e-05	2.24609e-05	-1.66016e-05	-9.76563e-07	-4.88281e-06	-1.17188e-05	2.44141e-06	9.76563e-07	-1.85547e-05	-0.000149414
0.000132813	-3.90625e-06	4.88281e-07	-9.76563e-07	-7.32422e-06	-3.17383e-05	-3.41797e-05	-1.07422e-05	-9.76563e-06	-0.000258789	0.000189453	7.32422e-07	-3.71094e-05	2.34375e-05	1.5625e-05	3.90625e-06	2.05078e-05	7.8125e-06	1.66016e-05	9.76563e-06	2.05078e-05	7.8125e-06	1.66016e-05	9.76563e-06	2.09961e-05	4.88281e-06	-0.000283203	6.34766e-06	7.8125e-06	1.66016e-05	1.85547e-05	1.5625e-05	-9.76563e-07	1.46484e-05	2.14844e-05	1.26953e-05	7.8125e-06	-0.000280273	3.4668e-05	2.24609e-05	-4.88281e-07	-0.000136719	-2.44141e-06	-4.88281e-06	-1.2207e-05	-1.17188e-05	-4.39453e-06	-9.47266e-05
0.000206055	-1.95313e-06	-5.85938e-06	-2.92969e-06	-1.2207e-05	-1.70898e-05	-1.46484e-05	-5.85938e-06	-9.76563e-06	-5.61523e-05	0.000358398	-1.46484e-06	-5.85938e-06	1.66016e-05	1.95313e-05	4.88281e-07	2.14844e-05	7.8125e-06	1.66016e-05	9.27734e-06	2.14844e-05	7.8125e-06	1.66016e-05	9.27734e-06	2.14844e-05	5.85938e-06	0.00045166	5.85938e-06	6.83594e-06	1.66016e-05	1.5625e-05	1.5625e-05	1.46484e-06	1.26953e-05	3.80859e-05	1.26953e-05	6.34766e-06	-0.000130859	-5.85938e-06	2.14844e-05	-1.51367e-05	-0.000162109	-2.39258e-05	-1.07422e-05	9.76563e-06	3.90625e-06	1.26953e-05	-9.08203e-05
0.000131348	3.90625e-06	-4.88281e-07	-9.76563e-07	1.46484e-05	2.44141e-06	9.76563e-06	5.37109e-06	-9.76563e-06	8.05664e-05	0.000446289	-1.46484e-06	0.000173828	1.36719e-05	2.34375e-05	3.41797e-06	2.14844e-05	9.27734e-06	1.66016e-05	9.27734e-06	2.14844e-05	9.27734e-06	1.66016e-05	9.27734e-06	1.07422e-05	8.78906e-06	0.00041748	7.8125e-06	6.34766e-06	1.66016e-05	1.66016e-05	1.5625e-05	1.46484e-06	1.36719e-05	5.76172e-05	1.66016e-05	5.37109e-06	0.000193359	2.44141e-06	2.05078e-05	-1.46484e-06	-0.000198242	-1.12305e-05	-9.76563e-07	-8.78906e-06	-1.17188e-05	1.26953e-05	-6.73828e-05
2.14844e-05	-2.92969e-06	-3.41797e-06	-4.39453e-06	1.95313e-05	9.76563e-06	2.14844e-05	6.10352e-06	-7.32422e-06	0.000117187	0.000349609	-3.90625e-06	0.000149414	1.5625e-05	1.5625e-05	5.85938e-06	1.95313e-05	7.32422e-06	1.75781e-05	8.30078e-06	1.95313e-05	7.32422e-06	1.75781e-05	8.30078e-06	-3.41797e-06	1.36719e-05	5.37109e-05	9.76563e-06	3.90625e-06	1.75781e-05	1.5625e-05	1.5625e-05	1.95313e-06	1.95313e-05	4.19922e-05	1.95313e-05	6.34766e-06	8.49609e-05	5.85938e-06	1.95313e-05	-1.36719e-05	-0.000178711	-1.66016e-05	-5.85938e-06	5.37109e-06	2.92969e-06	2.63672e-05	-2.92969e-06
1.66016e-05	-9.76563e-07	1.95313e-06	-9.76563e-07	-1.2207e-05	-4.88281e-06	9.76563e-07	2.44141e-06	-7.32422e-06	5.37109e-05	-0.000101562	-2.44141e-06	-3.51562e-05	1.5625e-05	3.90625e-06	8.78906e-06	1.95313e-05	3.41797e-06	1.46484e-05	7.8125e-06	1.95313e-05	3.41797e-06	1.46484e-05	7.8125e-06	-4.39453e-06	1.51367e-05	0.000117187	1.31836e-05	2.44141e-06	1.85547e-05	1.5625e-05	1.75781e-05	2.92969e-06	2.44141e-05	2.05078e-05	1.85547e-05	5.85938e-06	0.000116211	1.46484e-05	1.75781e-05	5.85938e-06	3.80859e-05	3.90625e-06	3.90625e-06	-1.46484e-05	-1.26953e-05	4.78516e-05	8.59375e-05
-7.95898e-05	-8.78906e-06	-4.88281e-06	-4.88281e-06	-2.68555e-05	2.44141e-06	8.78906e-06	2.19727e-06	-9.76563e-06	4.88281e-05	-0.000402344	-3.41797e-06	-0.000191406	1.17188e-05	9.76563e-06	1.85547e-05	2.05078e-05	-1.46484e-06	1.66016e-05	6.34766e-06	2.05078e-05	-1.46484e-06	1.66016e-05	6.34766e-06	-1.75781e-05	1.17188e-05	0.000390625	6.83594e-06	-9.76563e-07	1.66016e-05	1.5625e-05	1.95313e-05	2.92969e-06	2.44141e-05	8.78906e-06	1.85547e-05	6.34766e-06	-2.83203e-05	-2.44141e-06	1.66016e-05	-8.78906e-06	9.57031e-05	-9.76563e-07	-4.88281e-06	4.88281e-06	6.83594e-06	5.9082e-05	8.30078e-05
-0.000146973	-2.92969e-06	4.88281e-07	-1.46484e-06	-3.17383e-05	-1.2207e-05	-6.83594e-06	0	-7.32422e-06	9.76563e-06	-0.000447266	1.95313e-06	-5.76172e-05	1.66016e-05	2.05078e-05	1.5625e-05	1.95313e-05	-8.30078e-06	1.66016e-05	7.8125e-06	1.95313e-05	-8.30078e-06	1.66016e-05	7.8125e-06	-3.90625e-06	1.5625e-05	-8.05664e-05	2.92969e-06	-1.95313e-06	1.95313e-05	1.5625e-05	1.85547e-05	2.92969e-06	2.63672e-05	7.8125e-06	1.66016e-05	8.30078e-06	0.000123047	-3.22266e-05	1.95313e-05	5.85938e-06	6.25e-05	1.46484e-05	-1.95313e-06	-1.2207e-05	-1.17188e-05	2.68555e-05	7.61719e-05
-9.17969e-05	-4.88281e-06	-3.41797e-06	-5.37109e-06	-3.90625e-05	-2.44141e-06	2.92969e-06	2.44141e-07	-9.76563e-06	-7.32422e-06	-0.00037793	4.15039e-06	1.5625e-05	1.36719e-05	2.34375e-05	1.26953e-05	1.75781e-05	2.92969e-06	1.66016e-05	8.78906e-06	1.75781e-05	2.92969e-06	1.66016e-05	8.78906e-06	1.31836e-05	1.5625e-05	0.000317383	4.39453e-06	-4.88281e-07	1.66016e-05	1.46484e-05	1.85547e-05	5.37109e-06	2.05078e-05	1.36719e-05	1.17188e-05	8.78906e-06	-3.71094e-05	-2.53906e-05	2.14844e-05	-5.37109e-06	2.05078e-05	-3.41797e-06	-6.83594e-06	2.92969e-06	4.88281e-06	4.3457e-05	4.39453e-05
5.37109e-06	4.39453e-06	-4.88281e-07	-4.88281e-07	-7.8125e-05	-1.46484e-05	-1.36719e-05	-3.41797e-06	-1.2207e-05	2.19727e-05	-0.000217773	2.19727e-06	4.88281e-06	1.46484e-05	2.34375e-05	1.12305e-05	1.75781e-05	4.10156e-05	1.5625e-05	9.76563e-06	1.75781e-05	4.10156e-05	1.5625e-05	9.76563e-06	1.75781e-05	9.27734e-06	0.000432129	5.37109e-06	9.76563e-07	1.75781e-05	1.5625e-05	1.66016e-05	3.90625e-06	1.85547e-05	1.17188e-05	1.07422e-05	7.8125e-06	-0.000412109	9.76563e-07	2.05078e-05	3.90625e-06	3.80859e-05	1.07422e-05	-9.76563e-07	-1.31836e-05	-1.17188e-05	8.34961e-05	6.83594e-06
-3.90625e-06	-4.88281e-07	-3.90625e-06	-4.39453e-06	-4.15039e-05	-9.76563e-06	-1.95313e-06	-4.88281e-07	-1.2207e-05	-5.61523e-05	0.000467773	-1.46484e-05	-8.59375e-05	1.5625e-05	1.95313e-05	1.17188e-05	1.75781e-05	4.39453e-05	1.66016e-05	8.30078e-06	1.75781e-05	4.39453e-05	1.66016e-05	8.30078e-06	1.12305e-05	1.17188e-05	0.000166016	1.31836e-05	6.83594e-06	1.75781e-05	1.5625e-05	1.5625e-05	2.92969e-06	1.5625e-05	1.85547e-05	1.17188e-05	3.90625e-06	-0.000117187	1.80664e-05	1.75781e-05	-1.26953e-05	9.76563e-07	-2.92969e-06	-4.88281e-06	9.76563e-07	2.92969e-06	-3.66211e-05	1.66016e-05
-2.19727e-05	3.41797e-06	4.88281e-07	-1.46484e-06	4.63867e-05	-1.46484e-05	-1.66016e-05	-3.41797e-06	-1.2207e-05	-5.12695e-05	0.000229492	-9.0332e-06	-0.000117187	8.78906e-06	2.05078e-05	1.02539e-05	1.95313e-05	-0.000121582	1.75781e-05	8.78906e-06	1.95313e-05	-0.000121582	1.75781e-05	8.78906e-06	2.44141e-06	1.02539e-05	0.000554199	1.2207e-05	1.17188e-05	1.85547e-05	1.5625e-05	1.5625e-05	3.41797e-06	1.36719e-05	2.05078e-05	9.76563e-06	6.34766e-06	5.66406e-05	3.51562e-05	1.75781e-05	3.90625e-06	-4.29687e-05	-1.12305e-05	-1.95313e-06	-1.31836e-05	-8.78906e-06	-0.00011084	-1.95313e-06
0.000108398	-5.85938e-06	-3.90625e-06	-4.88281e-06	0.000134277	-7.32422e-06	-2.92969e-06	-2.19727e-06	-9.76563e-06	-3.17383e-05	-6.34766e-05	6.5918e-06	5.56641e-05	1.66016e-05	1.75781e-05	5.85938e-06	1.75781e-05	-8.54492e-05	1.66016e-05	8.78906e-06	1.75781e-05	-8.54492e-05	1.66016e-05	8.78906e-06	-5.37109e-06	-2.44141e-06	0.000773926	-3.41797e-06	1.46484e-05	1.66016e-05	1.66016e-05	1.5625e-05	2.44141e-06	1.36719e-05	3.61328e-05	1.17188e-05	9.76563e-06	8.98437e-05	1.95313e-05	1.17188e-05	-4.39453e-06	-3.32031e-05	-2.44141e-05	-9.76563e-06	3.90625e-06	3.90625e-06	3.85742e-05	-1.95313e-06
0.00015918	-4.88281e-07	4.88281e-07	-2.44141e-06	0.000222168	-1.46484e-05	-1.75781e-05	-4.15039e-06	-7.32422e-06	-2.92969e-05	-0.000170898	8.54492e-06	3.125e-05	1.95313e-05	1.95313e-05	2.92969e-06	1.5625e-05	8.74023e-05	1.46484e-05	1.17188e-05	1.5625e-05	8.74023e-05	1.46484e-05	1.17188e-05	-3.61328e-05	-3.27148e-05	0.000317383	-3.41797e-05	2.05078e-05	1.66016e-05	1.5625e-05	1.5625e-05	4.88281e-07	1.07422e-05	3.22266e-05	9.76563e-06	1.02539e-05	9.375e-05	-7.32422e-06	1.07422e-05	1.66016e-05	1.95313e-06	-6.34766e-06	-3.90625e-06	-1.2207e-05	-1.17188e-05	4.29687e-05	-1.75781e-05
2.7832e-05	-1.02539e-05	-5.37109e-06	-5.85938e-06	6.34766e-05	-2.44141e-06	4.88281e-06	0	-7.32422e-06	-1.46484e-05	-0.00025293	5.85938e-06	1.85547e-05	1.46484e-05	1.07422e-05	5.37109e-06	1.66016e-05	2.88086e-05	1.46484e-05	1.17188e-05	1.66016e-05	2.88086e-05	1.46484e-05	1.17188e-05	3.61328e-05	3.07617e-05	-0.00032959	2.49023e-05	1.9043e-05	1.66016e-05	1.75781e-05	1.46484e-05	0	1.36719e-05	1.95313e-05	1.17188e-05	7.32422e-06	0.000166016	1.07422e-05	1.26953e-05	6.83594e-06	-7.8125e-06	-2.00195e-05	-7.8125e-06	3.41797e-06	2.92969e-06	-0.000212402	-1.07422e-05
-7.4707e-05	-4.39453e-06	-4.88281e-07	-3.41797e-06	-6.34766e-05	-4.88281e-06	0	1.2207e-06	-7.32422e-06	7.32422e-06	-2.73438e-05	5.61523e-06	8.69141e-05	1.26953e-05	5.85938e-06	8.30078e-06	1.5625e-05	-0.000108887	1.5625e-05	1.31836e-05	1.5625e-05	-0.000108887	1.5625e-05	1.31836e-05	1.61133e-05	1.80664e-05	-0.000317383	1.95313e-05	1.61133e-05	1.66016e-05	1.66016e-05	1.5625e-05	-1.95313e-06	1.5625e-05	2.14844e-05	1.26953e-05	7.8125e-06	0.000108398	3.90625e-05	1.46484e-05	5.37109e-06	-1.17188e-05	4.88281e-07	-1.95313e-06	-1.46484e-05	-1.17188e-05	-0.000327148	-2.05078e-05
-0.000135254	-8.78906e-06	-4.88281e-06	-4.88281e-06	-3.90625e-05	-4.88281e-06	6.83594e-06	1.70898e-06	-7.32422e-06	9.76563e-06	2.73438e-05	-2.44141e-07	0.000129883	1.85547e-05	1.07422e-05	7.8125e-06	8.78906e-06	-0.00022998	1.85547e-05	1.12305e-05	8.78906e-06	-0.00022998	1.85547e-05	1.12305e-05	1.36719e-05	1.2207e-05	-0.000332031	1.61133e-05	1.75781e-05	1.66016e-05	1.66016e-05	1.5625e-05	-4.88281e-07	2.14844e-05	2.05078e-05	1.26953e-05	9.27734e-06	0.000125	3.07617e-05	1.95313e-05	-2.34375e-05	-3.22266e-05	1.46484e-06	-6.83594e-06	-9.76563e-07	9.76563e-07	-8.78906e-05	-1.85547e-05
-0.000152344	-1.95313e-06	0	-1.46484e-06	-9.76563e-06	-3.17383e-05	-3.02734e-05	-1.17188e-05	-9.76563e-06	-4.88281e-06	0.000171875	-4.88281e-07	9.86328e-05	2.24609e-05	1.5625e-05	8.78906e-06	9.76563e-06	-1.80664e-05	1.75781e-05	9.76563e-06	9.76563e-06	-1.80664e-05	1.75781e-05	9.76563e-06	1.70898e-05	1.26953e-05	-0.000458984	1.12305e-05	1.26953e-05	1.5625e-05	1.66016e-05	1.66016e-05	-1.46484e-06	1.95313e-05	1.75781e-05	1.46484e-05	6.83594e-06	-0.000120117	7.8125e-06	2.24609e-05	-2.88086e-05	-2.44141e-05	1.61133e-05	9.76563e-07	-1.75781e-05	-1.26953e-05	5.22461e-05	-2.92969e-05
-0.000120605	-6.34766e-06	-4.39453e-06	-2.44141e-06	-0.000146484	-1.95313e-05	-1.46484e-05	-7.56836e-06	-7.32422e-06	-2.44141e-05	0.000299805	-2.44141e-06	0.000128906	2.73438e-05	7.8125e-06	9.76563e-07	1.26953e-05	5.17578e-05	1.66016e-05	5.85938e-06	1.26953e-05	5.17578e-05	1.66016e-05	5.85938e-06	5.85938e-06	5.85938e-06	-0.000356445	4.39453e-06	8.78906e-06	1.66016e-05	1.66016e-05	1.5625e-05	-1.46484e-06	1.85547e-05	1.5625e-05	1.26953e-05	6.34766e-06	-0.000135742	-2.7832e-05	2.05078e-05	-2.53906e-05	-3.41797e-05	-7.32422e-06	-5.85938e-06	3.90625e-06	9.76563e-07	9.81445e-05	-2.14844e-05
-5.51758e-05	5.37109e-06	1.46484e-06	4.88281e-07	-0.000251465	-2.19727e-05	-1.5625e-05	-5.12695e-06	-9.76563e-06	-1.95313e-05	0.000113281	-4.15039e-06	0.000155273	2.73438e-05	6.83594e-06	1.95313e-06	1.36719e-05	0.000237793	1.85547e-05	4.39453e-06	1.36719e-05	0.000237793	1.85547e-05	4.39453e-06	4.88281e-06	9.76563e-06	-0.000307617	6.83594e-06	6.83594e-06	1.75781e-05	1.66016e-05	1.66016e-05	-2.44141e-06	1.36719e-05	1.46484e-05	1.5625e-05	7.32422e-06	-9.47266e-05	-7.32422e-06	1.85547e-05	-1.80664e-05	-1.95313e-05	-9.76563e-07	9.76563e-07	-9.27734e-06	-1.07422e-05	6.49414e-05	-2.44141e-05
-0.000127441	-4.88281e-07	-2.44141e-06	-3.41797e-06	-0.000168457	7.32422e-06	1.85547e-05	6.5918e-06	-9.76563e-06	-2.92969e-05	-1.95313e-06	-7.8125e-06	-6.15234e-05	2.14844e-05	1.17188e-05	4.39453e-06	1.26953e-05	0.000251953	1.75781e-05	6.83594e-06	1.26953e-05	0.000251953	1.75781e-05	6.83594e-06	4.88281e-06	1.07422e-05	-0.000444336	1.02539e-05	4.39453e-06	1.75781e-05	1.5625e-05	1.66016e-05	-1.95313e-06	1.5625e-05	1.26953e-05	1.36719e-05	8.78906e-06	6.83594e-05	2.92969e-05	1.85547e-05	-1.85547e-05	-2.53906e-05	-1.41602e-05	-6.83594e-06	4.88281e-06	0	0.000144043	-1.07422e-05
-3.80859e-05	2.44141e-06	0	-4.88281e-07	-7.56836e-05	0	9.76563e-07	4.15039e-06	-7.32422e-06	-1.95313e-05	-1.36719e-05	-3.17383e-06	-0.000287109	2.14844e-05	1.66016e-05	7.32422e-06	1.07422e-05	8.44727e-05	1.95313e-05	4.39453e-06	1.07422e-05	8.44727e-05	1.95313e-05	4.39453e-06	1.07422e-05	1.2207e-05	3.90625e-05	1.2207e-05	4.39453e-06	1.75781e-05	1.75781e-05	1.75781e-05	-9.76563e-07	1.95313e-05	1.17188e-05	1.66016e-05	7.8125e-06	0.000160156	3.22266e-05	1.95313e-05	1.41602e-05	-5.85938e-06	-7.8125e-06	9.76563e-07	-1.36719e-05	-1.36719e-05	7.91016e-05	-9.76563e-06
0.000179199	4.88281e-07	-3.90625e-06	-4.39453e-06	-3.66211e-05	2.44141e-06	9.76563e-06	3.90625e-06	-7.32422e-06	-1.95313e-05	0.000361328	0	-0.000303711	1.66016e-05	2.14844e-05	1.36719e-05	1.26953e-05	1.5625e-05	2.05078e-05	5.85938e-06	1.26953e-05	1.5625e-05	2.05078e-05	5.85938e-06	1.95313e-05	1.95313e-05	0.00101807	1.36719e-05	4.88281e-06	1.75781e-05	1.66016e-05	1.85547e-05	-1.46484e-06	1.85547e-05	1.07422e-05	1.46484e-05	8.78906e-06	8.10547e-05	4.88281e-06	1.5625e-05	8.78906e-06	-2.24609e-05	-1.51367e-05	-5.85938e-06	4.88281e-07	2.92969e-06	6.78711e-05	2.92969e-06
0.000242676	-4.88281e-06	-1.95313e-06	4.88281e-07	-4.88281e-05	-1.46484e-05	-7.8125e-06	-2.44141e-07	-7.32422e-06	-9.76563e-06	0.000210937	5.12695e-06	-9.17969e-05	1.17188e-05	2.14844e-05	1.66016e-05	5.85938e-06	-0.000118164	1.95313e-05	6.34766e-06	5.85938e-06	-0.000118164	1.95313e-05	6.34766e-06	1.61133e-05	1.61133e-05	0.000981445	7.8125e-06	4.88281e-06	1.75781e-05	1.5625e-05	1.85547e-05	-9.76563e-07	1.5625e-05	7.8125e-06	1.5625e-05	8.78906e-06	-9.57031e-05	-9.76563e-07	1.66016e-05	1.41602e-05	-6.83594e-06	8.30078e-06	0	-1.61133e-05	-9.76563e-06	5.07812e-05	-9.76563e-07
0.000164063	-1.51367e-05	-5.85938e-06	-1.95313e-06	-7.32422e-06	-7.32422e-06	3.90625e-06	9.76563e-07	-9.76563e-06	-2.44141e-06	-0.000173828	5.37109e-06	0.000298828	9.76563e-06	1.75781e-05	1.31836e-05	6.83594e-06	-0.000131348	1.85547e-05	4.88281e-06	6.83594e-06	-0.000131348	1.85547e-05	4.88281e-06	1.41602e-05	9.27734e-06	0.000297852	7.8125e-06	-9.76563e-07	1.46484e-05	1.46484e-05	1.75781e-05	0	1.66016e-05	8.78906e-06	1.36719e-05	7.32422e-06	-0.000166016	-3.90625e-06	1.66016e-05	-9.76563e-06	-1.26953e-05	5.37109e-06	-7.8125e-06	-9.76563e-07	2.92969e-06	-3.95508e-05	4.88281e-06
0.000110352	1.46484e-06	-4.88281e-07	-4.88281e-07	0.000100098	-9.76563e-06	-9.76563e-06	-2.19727e-06	-9.76563e-06	2.44141e-06	-0.000350586	1.95313e-06	0.000229492	1.36719e-05	1.66016e-05	1.26953e-05	7.8125e-06	0.000512695	1.95313e-05	4.39453e-06	7.8125e-06	0.000512695	1.95313e-05	4.39453e-06	1.85547e-05	1.46484e-06	-0.00017334	3.90625e-06	9.76563e-07	1.66016e-05	1.66016e-05	1.85547e-05	-4.88281e-07	1.5625e-05	7.8125e-06	1.36719e-05	7.8125e-06	-0.000155273	9.76563e-07	1.5625e-05	-2.92969e-06	4.88281e-06	2.92969e-06	-4.88281e-06	-1.26953e-05	-8.78906e-06	-0.00013623	2.92969e-06
-1.70898e-05	1.95313e-06	-5.37109e-06	-6.34766e-06	3.17383e-05	-2.44141e-06	2.92969e-06	-1.95313e-06	-9.76563e-06	-1.70898e-05	-0.000376953	-7.8125e-06	0.000102539	1.95313e-05	1.26953e-05	1.17188e-05	4.88281e-06	2.92969e-06	1.5625e-05	6.83594e-06	4.88281e-06	2.92969e-06	1.5625e-05	6.83594e-06	1.66016e-05	4.39453e-06	-0.000661621	5.85938e-06	2.44141e-06	1.46484e-05	1.66016e-05	2.14844e-05	1.95313e-06	2.14844e-05	7.8125e-06	1.46484e-05	1.02539e-05	-1.07422e-05	4.39453e-06	1.5625e-05	-5.37109e-06	-4.88281e-06	-1.5625e-05	-8.78906e-06	3.41797e-06	5.85938e-06	-4.54102e-05	9.76563e-06
-0.000103027	2.92969e-06	-1.46484e-06	-1.95313e-06	-4.88281e-05	-1.70898e-05	-1.36719e-05	-3.17383e-06	-1.2207e-05	-2.44141e-05	-0.000146484	-1.24512e-05	8.30078e-05	2.14844e-05	1.46484e-05	1.12305e-05	-9.76563e-07	-0.000240234	1.46484e-05	7.32422e-06	-9.76563e-07	-0.000240234	1.46484e-05	7.32422e-06	1.51367e-05	1.51367e-05	-0.000705566	1.41602e-05	6.34766e-06	1.46484e-05	1.66016e-05	1.95313e-05	1.95313e-06	2.05078e-05	4.88281e-06	1.75781e-05	1.07422e-05	0.000131836	9.27734e-06	1.5625e-05	4.88281e-06	1.95313e-05	-1.17188e-05	-9.76563e-07	-1.17188e-05	-8.78906e-06	4.3457e-05	7.8125e-06
-1.41602e-05	2.44141e-06	-5.37109e-06	-3.90625e-06	-0.000107422	-1.2207e-05	-1.95313e-06	-1.46484e-06	-9.76563e-06	-4.88281e-06	-6.34766e-05	-2.44141e-07	0.000106445	1.95313e-05	2.05078e-05	8.30078e-06	1.26953e-05	-4.78516e-05	1.17188e-05	7.8125e-06	1.26953e-05	-4.78516e-05	1.17188e-05	7.8125e-06	-7.8125e-06	9.27734e-06	-3.66211e-05	3.41797e-06	1.36719e-05	1.75781e-05	1.66016e-05	1.26953e-05	1.46484e-06	2.14844e-05	5.85938e-06	1.75781e-05	8.30078e-06	6.64063e-05	1.12305e-05	1.46484e-05	-1.46484e-06	6.25e-05	0	-5.85938e-06	1.95313e-06	5.85938e-06	9.86328e-05	1.26953e-05
0.000106934	7.32422e-06	4.88281e-07	-4.88281e-07	-8.30078e-05	-1.70898e-05	-1.26953e-05	-2.92969e-06	-7.32422e-06	1.46484e-05	-3.61328e-05	6.83594e-06	9.76563e-06	1.5625e-05	1.75781e-05	8.78906e-06	2.44141e-05	-0.000133301	1.17188e-05	7.32422e-06	2.44141e-05	-0.000133301	1.17188e-05	7.32422e-06	-7.32422e-05	-5.66406e-05	0.000810547	-6.39648e-05	1.51367e-05	1.66016e-05	2.24609e-05	7.8125e-06	3.90625e-06	2.24609e-05	4.88281e-06	1.75781e-05	6.83594e-06	-0.000200195	6.34766e-06	1.26953e-05	5.37109e-06	5.07812e-05	2.34375e-05	1.95313e-06	-1.5625e-05	-7.8125e-06	0.000120605	7.8125e-06
1.51367e-05	-6.34766e-06	-2.92969e-06	-3.90625e-06	1.46484e-05	-9.76563e-06	-9.76563e-07	-1.70898e-06	-9.76563e-06	2.44141e-06	2.63672e-05	4.88281e-06	-2.44141e-05	9.76563e-06	1.85547e-05	6.83594e-06	2.63672e-05	-0.000190918	1.07422e-05	4.39453e-06	2.63672e-05	-0.000190918	1.07422e-05	4.39453e-06	-5.07812e-05	3.90625e-06	0.000883789	1.51367e-05	2.92969e-06	1.66016e-05	2.44141e-05	1.36719e-05	3.41797e-06	2.14844e-05	6.83594e-06	1.75781e-05	7.8125e-06	-2.44141e-05	2.92969e-06	1.07422e-05	-2.24609e-05	-0.000164063	-1.95313e-06	-3.90625e-06	1.46484e-06	8.78906e-06	8.78906e-05	1.07422e-05
-7.61719e-05	-1.07422e-05	4.88281e-07	-9.76563e-07	0.000146484	-1.2207e-05	-1.95313e-06	0	-9.76563e-06	2.44141e-06	0.000230469	3.17383e-06	-8.78906e-06	8.78906e-06	1.26953e-05	3.90625e-06	3.80859e-05	-9.0332e-05	1.26953e-05	6.34766e-06	3.80859e-05	-9.0332e-05	1.26953e-05	6.34766e-06	-4.88281e-07	2.63672e-05	0.000432129	3.90625e-05	-8.78906e-06	1.66016e-05	2.63672e-05	3.90625e-06	2.44141e-06	1.95313e-05	5.85938e-06	1.5625e-05	7.8125e-06	0.000239258	-4.39453e-06	1.17188e-05	-3.41797e-06	-0.000124023	4.88281e-07	3.90625e-06	-7.8125e-06	-4.88281e-06	-0.000327148	0
-0.000123047	-9.76563e-06	-3.41797e-06	-5.37109e-06	4.88281e-05	0	7.8125e-06	1.70898e-06	-9.76563e-06	-4.88281e-06	0.000390625	2.44141e-07	3.51562e-05	1.66016e-05	1.5625e-05	6.34766e-06	3.32031e-05	3.80859e-05	1.17188e-05	5.37109e-06	3.32031e-05	3.80859e-05	1.17188e-05	5.37109e-06	3.85742e-05	2.05078e-05	-0.000234375	3.32031e-05	7.8125e-06	1.5625e-05	2.92969e-05	0.00012793	3.90625e-06	1.85547e-05	6.83594e-06	1.46484e-05	7.8125e-06	0.000209961	-3.41797e-06	1.66016e-05	-5.85938e-06	5.76172e-05	-8.78906e-06	-1.95313e-06	6.34766e-06	5.85938e-06	-0.000319824	4.88281e-06
-0.000101562	-1.46484e-06	-4.88281e-07	-9.76563e-07	-8.30078e-05	-9.76563e-06	-1.26953e-05	-2.44141e-06	-7.32422e-06	0	0.000189453	-9.76563e-07	6.25e-05	1.95313e-05	1.75781e-05	3.41797e-06	3.90625e-06	-0.000124512	1.26953e-05	8.30078e-06	3.90625e-06	-0.000124512	1.26953e-05	8.30078e-06	1.51367e-05	1.95313e-05	-0.000576172	2.19727e-05	3.02734e-05	1.95313e-05	2.44141e-05	-1.07422e-05	4.88281e-06	1.66016e-05	7.8125e-06	1.5625e-05	7.32422e-06	2.53906e-05	1.66016e-05	1.26953e-05	1.12305e-05	9.47266e-05	-1.95313e-06	4.88281e-06	-1.07422e-05	-6.83594e-06	-0.000120117	-4.88281e-06
-0.000107422	-8.30078e-06	-7.8125e-06	-5.37109e-06	-0.00010498	-2.19727e-05	-2.24609e-05	-1.07422e-05	-9.76563e-06	-7.32422e-06	0.000103516	-2.19727e-06	6.05469e-05	1.95313e-05	1.95313e-05	1.46484e-06	2.92969e-06	-0.000134766	1.46484e-05	9.27734e-06	2.92969e-06	-0.000134766	1.46484e-05	9.27734e-06	3.125e-05	1.31836e-05	-0.000175781	6.34766e-06	3.4668e-05	1.75781e-05	1.36719e-05	-2.92969e-05	3.41797e-06	1.5625e-05	6.83594e-06	1.46484e-05	5.85938e-06	-8.59375e-05	2.09961e-05	1.17188e-05	-2.44141e-06	6.05469e-05	-1.12305e-05	-1.95313e-06	4.88281e-06	6.83594e-06	-3.125e-05	3.90625e-06
-6.54297e-05	-4.88281e-07	-1.95313e-06	-1.95313e-06	-5.85937e-05	-2.92969e-05	-2.92969e-05	-8.54492e-06	-9.76563e-06	2.44141e-06	0.000164063	1.2207e-06	5.85937e-05	1.46484e-05	1.36719e-05	-4.88281e-06	7.8125e-06	0.00017041	1.5625e-05	9.76563e-06	7.8125e-06	0.00017041	1.5625e-05	9.76563e-06	6.73828e-05	3.90625e-06	1.95313e-05	2.44141e-06	2.58789e-05	1.75781e-05	9.76563e-07	-1.17188e-05	4.88281e-06	1.66016e-05	8.78906e-06	1.36719e-05	9.27734e-06	0.000135742	1.46484e-05	1.75781e-05	7.32422e-06	3.32031e-05	-1.46484e-06	3.90625e-06	-9.27734e-06	-4.88281e-06	8.69141e-05	0
-8.44727e-05	-3.90625e-06	-5.37109e-06	-6.34766e-06	4.88281e-06	4.88281e-06	1.46484e-05	5.37109e-06	-9.76563e-06	-9.76563e-06	-3.80859e-05	-1.46484e-06	4.19922e-05	1.36719e-05	1.36719e-05	1.95313e-06	1.07422e-05	0.00015332	1.66016e-05	1.02539e-05	1.07422e-05	0.00015332	1.66016e-05	1.02539e-05	9.0332e-05	2.92969e-06	-0.000236816	3.90625e-06	1.12305e-05	1.75781e-05	-2.92969e-06	9.76563e-07	7.8125e-06	1.66016e-05	7.8125e-06	1.36719e-05	1.02539e-05	0.00043457	1.75781e-05	1.66016e-05	-9.27734e-06	2.53906e-05	-1.12305e-05	-1.95313e-06	2.44141e-06	5.85938e-06	0.000125	3.90625e-06
-9.86328e-05	-9.76563e-07	0	-9.76563e-07	3.17383e-05	0	7.8125e-06	4.63867e-06	-7.32422e-06	-7.32422e-06	-0.000451172	-1.95313e-06	3.80859e-05	1.66016e-05	1.46484e-05	9.76563e-06	1.26953e-05	4.39453e-05	1.5625e-05	7.8125e-06	1.26953e-05	4.39453e-05	1.5625e-05	7.8125e-06	4.10156e-05	4.39453e-06	-0.000305176	4.39453e-06	2.92969e-06	1.75781e-05	6.83594e-06	7.12891e-05	9.27734e-06	1.46484e-05	9.76563e-06	1.5625e-05	1.02539e-05	0.000427734	1.80664e-05	1.26953e-05	7.8125e-06	-0.000152344	4.39453e-06	9.76563e-07	-1.61133e-05	-9.76563e-06	7.8125e-05	-3.90625e-06
-8.44727e-05	-6.83594e-06	-3.90625e-06	-9.76563e-07	-0.000170898	2.44141e-06	1.75781e-05	4.39453e-06	-9.76563e-06	-1.2207e-05	-0.000341797	-2.68555e-06	3.32031e-05	2.34375e-05	1.17188e-05	4.88281e-06	5.85938e-06	7.32422e-05	1.75781e-05	7.8125e-06	5.85938e-06	7.32422e-05	1.75781e-05	7.8125e-06	-5.85938e-06	1.46484e-05	-0.000119629	8.78906e-06	9.76563e-07	1.66016e-05	3.90625e-06	8.39844e-05	1.12305e-05	1.26953e-05	1.07422e-05	1.75781e-05	9.27734e-06	-0.000375	2.68555e-05	1.36719e-05	-6.83594e-06	-9.76563e-07	-2.92969e-06	-4.88281e-06	1.46484e-06	5.85938e-06	8.59375e-05	8.78906e-06
8.1543e-05	0	4.88281e-07	3.90625e-06	-0.000236816	-1.46484e-05	-1.95313e-06	9.76563e-07	-1.2207e-05	-2.44141e-06	4.00391e-05	-4.88281e-07	1.07422e-05	2.53906e-05	1.5625e-05	4.39453e-06	4.88281e-06	3.71094e-05	1.85547e-05	5.85938e-06	4.88281e-06	3.71094e-05	1.85547e-05	5.85938e-06	-4.6875e-05	1.66016e-05	0.00034668	1.07422e-05	2.44141e-06	1.75781e-05	1.17188e-05	1.17188e-05	1.07422e-05	1.17188e-05	9.76563e-06	1.75781e-05	8.30078e-06	-0.000410156	3.51562e-05	1.66016e-05	7.8125e-06	0.000203125	6.83594e-06	2.92969e-06	-1.51367e-05	-7.8125e-06	0.000140625	2.92969e-06
0.000213379	-7.32422e-06	-4.88281e-06	-9.76563e-07	-7.08008e-05	-7.32422e-06	3.90625e-06	4.88281e-07	-9.76563e-06	-1.46484e-05	6.25e-05	-1.70898e-06	-2.14844e-05	3.02734e-05	1.85547e-05	1.07422e-05	1.66016e-05	3.75977e-05	1.75781e-05	5.37109e-06	1.66016e-05	3.75977e-05	1.75781e-05	5.37109e-06	-8.78906e-05	1.36719e-05	0.000266113	9.76563e-06	4.88281e-07	1.66016e-05	2.44141e-05	1.17188e-05	1.36719e-05	1.26953e-05	1.26953e-05	1.5625e-05	4.88281e-06	-6.54297e-05	2.14844e-05	1.75781e-05	-1.17188e-05	0.000120117	-5.85938e-06	-5.85938e-06	2.92969e-06	3.90625e-06	6.64063e-05	7.8125e-06
7.76367e-05	-4.39453e-06	-4.88281e-07	1.46484e-06	2.44141e-05	-1.46484e-05	-8.78906e-06	-1.95313e-06	-7.32422e-06	4.88281e-06	5.07812e-05	2.44141e-06	-9.57031e-05	4.00391e-05	2.14844e-05	1.36719e-05	1.75781e-05	8.1543e-05	1.75781e-05	4.88281e-06	1.75781e-05	8.1543e-05	1.75781e-05	4.88281e-06	-0.000102051	9.27734e-06	-2.19727e-05	8.30078e-06	0	1.5625e-05	1.85547e-05	1.17188e-05	1.26953e-05	1.17188e-05	1.36719e-05	1.5625e-05	8.78906e-06	0.000189453	-2.09961e-05	1.36719e-05	1.95313e-06	3.90625e-05	1.46484e-06	-9.76563e-07	-1.26953e-05	-9.76563e-06	-4.54102e-05	-2.92969e-06
-1.36719e-05	-1.07422e-05	-4.88281e-06	-1.95313e-06	0.000583496	-2.44141e-06	9.76563e-07	-9.76563e-07	-7.32422e-06	-4.88281e-06	2.05078e-05	-9.76563e-07	-0.00021582	1.17188e-05	1.85547e-05	1.51367e-05	1.85547e-05	5.27344e-05	1.66016e-05	6.34766e-06	1.85547e-05	5.27344e-05	1.66016e-05	6.34766e-06	-5.46875e-05	6.83594e-06	-0.000358887	9.76563e-06	-4.88281e-07	1.5625e-05	2.24609e-05	-4.88281e-06	1.5625e-05	1.26953e-05	1.36719e-05	1.46484e-05	7.32422e-06	0.000102539	-5.51758e-05	1.5625e-05	-1.17188e-05	-7.71484e-05	-1.17188e-05	-7.8125e-06	1.02539e-05	6.83594e-06	-7.12891e-05	2.92969e-06
8.30078e-05	0	-4.88281e-07	9.76563e-07	0.000500488	-1.2207e-05	-1.46484e-05	-3.66211e-06	-1.2207e-05	-3.66211e-05	-5.66406e-05	-1.29395e-05	-0.000208008	-3.71094e-05	2.24609e-05	1.51367e-05	1.85547e-05	2.49023e-05	1.66016e-05	5.85938e-06	1.85547e-05	2.49023e-05	1.66016e-05	5.85938e-06	3.02734e-05	8.30078e-06	-0.000515137	1.41602e-05	5.37109e-06	1.66016e-05	2.14844e-05	-3.02734e-05	1.5625e-05	1.75781e-05	1.5625e-05	1.36719e-05	7.8125e-06	0.000149414	-2.73438e-05	1.5625e-05	-1.46484e-06	-0.000119141	4.88281e-07	0	-4.88281e-06	-9.76563e-06	-5.12695e-05	-3.90625e-06
1.66016e-05	-5.85938e-06	-6.34766e-06	-4.39453e-06	-0.00017334	-1.2207e-05	-5.85938e-06	-1.95313e-06	-1.2207e-05	-3.41797e-05	-5.95703e-05	-9.76563e-06	5.37109e-05	-0.000458008	3.22266e-05	1.66016e-05	1.95313e-05	4.88281e-07	1.66016e-05	7.32422e-06	1.95313e-05	4.88281e-07	1.66016e-05	7.32422e-06	6.20117e-05	1.07422e-05	-0.000114746	1.51367e-05	1.07422e-05	1.5625e-05	1.26953e-05	-7.03125e-05	1.36719e-05	1.85547e-05	1.46484e-05	1.5625e-05	9.76563e-06	-9.76563e-06	1.17188e-05	1.46484e-05	-5.85938e-06	-5.95703e-05	8.30078e-06	-3.90625e-06	8.78906e-06	2.92969e-06	-5.85938e-06	-5.85938e-06
-2.29492e-05	-2.44141e-06	-9.76563e-07	-1.46484e-06	-0.000351562	-1.46484e-05	-1.66016e-05	-4.15039e-06	-9.76563e-06	9.76563e-06	-9.76563e-07	6.10352e-06	-1.17188e-05	-1.36719e-05	4.49219e-05	1.36719e-05	1.95313e-05	-1.80664e-05	1.75781e-05	9.27734e-06	1.95313e-05	-1.80664e-05	1.75781e-05	9.27734e-06	9.81445e-05	-4.88281e-07	0.000212402	2.92969e-06	8.30078e-06	1.75781e-05	1.26953e-05	-3.61328e-05	1.36719e-05	1.95313e-05	1.5625e-05	1.46484e-05	8.30078e-06	-3.41797e-05	1.5625e-05	1.46484e-05	1.5625e-05	9.76563e-06	2.24609e-05	0	-1.41602e-05	-1.36719e-05	1.46484e-06	-2.63672e-05
-1.17188e-05	-7.32422e-06	-5.85938e-06	-5.37109e-06	-0.000244141	0	-2.92969e-06	-1.46484e-06	-7.32422e-06	4.88281e-06	-1.07422e-05	4.15039e-06	0.000163086	0.000331055	3.32031e-05	1.75781e-05	1.95313e-05	4.6875e-05	1.75781e-05	9.27734e-06	1.95313e-05	4.6875e-05	1.75781e-05	9.27734e-06	4.05273e-05	-7.32422e-05	0.00026123	-7.12891e-05	4.88281e-06	1.66016e-05	1.75781e-05	4.58984e-05	1.36719e-05	1.5625e-05	1.66016e-05	1.46484e-05	1.95313e-06	6.83594e-06	9.27734e-06	1.75781e-05	-7.8125e-06	1.95313e-05	-2.92969e-06	-4.88281e-06	2.44141e-06	2.92969e-06	4.19922e-05	1.95313e-06
4.88281e-07	9.76563e-07	-1.46484e-06	0	0	-9.76563e-06	-1.36719e-05	-3.17383e-06	-7.32422e-06	7.32422e-06	3.90625e-06	4.39453e-06	0.000287109	7.71484e-05	2.34375e-05	2.29492e-05	2.05078e-05	2.29492e-05	1.46484e-05	9.76563e-06	2.05078e-05	2.29492e-05	1.46484e-05	9.76563e-06	0.000169922	2.92969e-05	3.90625e-05	3.41797e-05	6.83594e-06	1.5625e-05	1.85547e-05	6.34766e-05	1.41602e-05	1.46484e-05	1.75781e-05	1.75781e-05	4.39453e-06	0.000360352	3.36914e-05	1.66016e-05	0	5.85938e-06	-5.37109e-06	9.76563e-07	-9.27734e-06	-8.78906e-06	1.80664e-05	-8.78906e-06
-8.59375e-05	-4.88281e-06	-4.88281e-06	-5.37109e-06	9.52148e-05	2.44141e-06	1.36719e-05	1.95313e-06	-7.32422e-06	-7.32422e-06	-2.92969e-06	1.95313e-06	0.000320313	-3.125e-05	-1.36719e-05	2.24609e-05	1.95313e-05	-3.75977e-05	1.26953e-05	6.34766e-06	1.95313e-05	-3.75977e-05	1.26953e-05	6.34766e-06	0.000165039	3.125e-05	-0.00010498	3.4668e-05	4.88281e-06	1.5625e-05	1.75781e-05	5.07812e-05	1.5625e-05	1.17188e-05	1.66016e-05	1.75781e-05	1.31836e-05	-3.51562e-05	2.7832e-05	1.26953e-05	-2.49023e-05	-0.000136719	-1.51367e-05	-3.90625e-06	1.95313e-06	3.90625e-06	-2.05078e-05	-2.92969e-06
-0.00013623	5.37109e-06	1.46484e-06	-1.95313e-06	0.00012207	-7.32422e-06	-3.90625e-06	-2.44141e-07	-4.88281e-06	-4.88281e-06	2.92969e-06	1.70898e-06	0.000253906	9.27734e-05	-1.95313e-05	3.32031e-05	1.85547e-05	-6.05469e-05	1.17188e-05	5.85938e-06	1.85547e-05	-6.05469e-05	1.17188e-05	5.85938e-06	4.00391e-05	2.24609e-05	1.46484e-05	2.49023e-05	4.88281e-06	1.66016e-05	2.14844e-05	3.90625e-05	1.51367e-05	1.17188e-05	1.46484e-05	1.46484e-05	1.31836e-05	-0.000515625	-1.61133e-05	1.17188e-05	-1.95313e-05	-1.26953e-05	-1.95313e-06	9.76563e-07	-1.70898e-05	-8.78906e-06	-1.61133e-05	1.95313e-06
-1.17188e-05	-2.44141e-06	-3.90625e-06	-5.37109e-06	9.27734e-05	-1.2207e-05	-8.78906e-06	-6.5918e-06	-7.32422e-06	-1.2207e-05	3.90625e-06	-2.44141e-07	9.66797e-05	0.000311523	-1.66016e-05	1.85547e-05	1.75781e-05	-4.24805e-05	1.17188e-05	7.8125e-06	1.75781e-05	-4.24805e-05	1.17188e-05	7.8125e-06	-4.63867e-05	1.75781e-05	4.63867e-05	1.61133e-05	4.39453e-06	1.5625e-05	2.05078e-05	3.125e-05	1.51367e-05	9.76563e-06	1.46484e-05	1.75781e-05	1.07422e-05	-0.00040332	-8.30078e-06	1.26953e-05	-1.46484e-05	1.75781e-05	-2.24609e-05	-1.95313e-06	1.95313e-06	3.90625e-06	-3.61328e-05	3.51562e-05
5.85937e-05	-2.92969e-06	-1.95313e-06	0	-2.68555e-05	-3.41797e-05	-2.73438e-05	-8.78906e-06	-7.32422e-06	-4.88281e-06	2.24609e-05	9.76563e-07	-5.27344e-05	0.000165039	3.90625e-06	-9.76563e-06	1.75781e-05	-4.88281e-06	1.17188e-05	9.27734e-06	1.75781e-05	-4.88281e-06	1.17188e-05	9.27734e-06	-5.95703e-05	5.37109e-06	4.88281e-05	-4.88281e-07	6.83594e-06	1.75781e-05	1.36719e-05	2.53906e-05	1.31836e-05	1.36719e-05	1.36719e-05	1.75781e-05	1.07422e-05	-7.8125e-06	1.07422e-05	1.46484e-05	1.2207e-05	4.49219e-05	-5.85938e-06	0	-1.02539e-05	-8.78906e-06	-2.49023e-05	-2.05078e-05
5.85938e-06	-1.02539e-05	-7.8125e-06	-2.92969e-06	-9.0332e-05	-1.95313e-05	-5.85938e-06	-4.15039e-06	-7.32422e-06	-1.70898e-05	1.36719e-05	-9.76563e-07	-7.22656e-05	-7.71484e-05	1.85547e-05	-1.70898e-05	1.66016e-05	1.95313e-06	1.36719e-05	1.02539e-05	1.66016e-05	1.95313e-06	1.36719e-05	1.02539e-05	-4.3457e-05	4.39453e-06	2.92969e-05	4.88281e-07	7.32422e-06	1.66016e-05	1.07422e-05	1.85547e-05	1.31836e-05	1.46484e-05	1.66016e-05	1.95313e-05	1.12305e-05	0.000204102	4.00391e-05	1.66016e-05	1.31836e-05	4.58984e-05	9.76563e-06	-5.85938e-06	1.26953e-05	5.85938e-06	2.14844e-05	-4.58984e-05
-3.51562e-05	-3.41797e-06	1.46484e-06	-4.88281e-07	3.66211e-05	-7.32422e-06	-1.95313e-06	2.44141e-06	-9.76563e-06	-9.76563e-06	-5.17578e-05	-1.46484e-06	-5.46875e-05	-0.000144531	3.02734e-05	-8.78906e-06	1.5625e-05	2.49023e-05	1.46484e-05	1.2207e-05	1.5625e-05	2.49023e-05	1.46484e-05	1.2207e-05	-1.75781e-05	4.88281e-06	1.46484e-05	2.44141e-06	8.78906e-06	1.46484e-05	8.78906e-06	1.07422e-05	1.36719e-05	1.85547e-05	1.95313e-05	2.14844e-05	6.83594e-06	8.78906e-05	3.66211e-05	1.95313e-05	2.88086e-05	2.53906e-05	2.00195e-05	1.95313e-06	-4.88281e-06	-8.78906e-06	3.85742e-05	-5.27344e-05
-4.39453e-06	-1.02539e-05	-1.95313e-06	-3.41797e-06	6.5918e-05	4.88281e-06	1.66016e-05	6.34766e-06	-1.46484e-05	-2.19727e-05	-9.76563e-05	-4.88281e-06	-8.59375e-05	-0.000144531	2.92969e-05	-7.8125e-06	1.5625e-05	5.85938e-06	1.5625e-05	1.26953e-05	1.5625e-05	5.85938e-06	1.5625e-05	1.26953e-05	-1.07422e-05	5.85938e-06	2.19727e-05	3.90625e-06	3.90625e-06	1.46484e-05	9.76563e-06	6.83594e-06	1.41602e-05	2.34375e-05	2.05078e-05	2.14844e-05	6.83594e-06	-2.63672e-05	-1.36719e-05	2.14844e-05	4.88281e-06	-1.36719e-05	4.88281e-07	-7.8125e-06	4.88281e-06	1.95313e-06	4.88281e-05	-1.75781e-05
4.00391e-05	-1.46484e-06	4.88281e-07	4.88281e-07	-7.32422e-05	-9.76563e-06	-5.85938e-06	1.46484e-06	-9.76563e-06	-9.76563e-06	-6.73828e-05	-3.41797e-06	-0.000125977	-0.000137695	2.73438e-05	2.44141e-06	1.66016e-05	1.66016e-05	1.75781e-05	9.76563e-06	1.66016e-05	1.66016e-05	1.75781e-05	9.76563e-06	-2.73438e-05	1.9043e-05	2.68555e-05	1.70898e-05	4.88281e-07	1.5625e-05	1.46484e-05	3.90625e-06	1.36719e-05	2.53906e-05	2.14844e-05	1.85547e-05	1.26953e-05	0.000115234	-3.27148e-05	2.05078e-05	4.88281e-07	-2.44141e-05	2.92969e-06	-2.92969e-06	-1.80664e-05	-1.5625e-05	2.19727e-05	3.61328e-05
2.09961e-05	-4.39453e-06	-4.88281e-06	-2.44141e-06	-2.92969e-05	-2.44141e-06	5.85938e-06	2.44141e-06	-9.76563e-06	-1.95313e-05	0.000160156	-3.17383e-06	-0.000116211	5.07812e-05	2.63672e-05	2.19727e-05	1.75781e-05	2.39258e-05	1.85547e-05	1.02539e-05	1.75781e-05	2.39258e-05	1.85547e-05	1.02539e-05	-5.41992e-05	1.41602e-05	8.54492e-05	1.66016e-05	1.95313e-06	1.26953e-05	1.75781e-05	3.90625e-06	1.51367e-05	2.34375e-05	2.05078e-05	1.66016e-05	9.76563e-06	-1.5625e-05	7.32422e-06	1.95313e-05	-3.4668e-05	-3.32031e-05	-3.95508e-05	-9.76563e-06	1.46484e-06	5.85938e-06	3.125e-05	4.49219e-05
-2.39258e-05	0	0	9.76563e-07	1.2207e-05	-7.32422e-06	-6.83594e-06	-9.76563e-07	-9.76563e-06	2.44141e-06	0.000570312	1.70898e-06	-7.51953e-05	5.07812e-05	2.44141e-05	3.51562e-05	1.85547e-05	2.83203e-05	1.5625e-05	9.27734e-06	1.85547e-05	2.83203e-05	1.5625e-05	9.27734e-06	-8.78906e-06	8.30078e-06	0.000214844	1.61133e-05	5.85938e-06	1.26953e-05	1.75781e-05	6.83594e-06	1.36719e-05	1.85547e-05	1.95313e-05	1.66016e-05	6.83594e-06	9.66797e-05	2.29492e-05	1.5625e-05	-1.66016e-05	-9.76563e-06	-4.73633e-05	-1.95313e-06	-1.9043e-05	-1.26953e-05	3.17383e-05	0.000110352
-6.68945e-05	-6.83594e-06	-6.34766e-06	-3.41797e-06	-8.05664e-05	2.44141e-06	3.90625e-06	0	-4.88281e-06	-2.44141e-06	0.000129883	2.44141e-06	-5.17578e-05	0.000223633	2.24609e-05	2.58789e-05	1.5625e-05	3.07617e-05	1.66016e-05	9.27734e-06	1.5625e-05	3.07617e-05	1.66016e-05	9.27734e-06	4.49219e-05	1.17188e-05	9.27734e-05	1.61133e-05	9.76563e-06	1.66016e-05	1.66016e-05	7.8125e-06	1.46484e-05	1.5625e-05	1.75781e-05	1.46484e-05	6.34766e-06	0.000243164	9.76563e-06	1.26953e-05	-2.63672e-05	1.17188e-05	-5.07812e-05	-8.78906e-06	4.88281e-06	3.90625e-06	2.44141e-05	-0.000108398
-5.66406e-05	4.88281e-07	4.88281e-07	-9.76563e-07	-6.10352e-05	-7.32422e-06	-1.07422e-05	-2.92969e-06	-4.88281e-06	-4.88281e-06	4.39453e-05	7.32422e-07	-8.39844e-05	6.34766e-05	1.95313e-05	1.46484e-06	1.36719e-05	3.27148e-05	1.46484e-05	8.78906e-06	1.36719e-05	3.27148e-05	1.46484e-05	8.78906e-06	5.0293e-05	1.61133e-05	1.70898e-05	1.41602e-05	1.61133e-05	1.66016e-05	1.46484e-05	9.76563e-06	1.46484e-05	1.17188e-05	1.66016e-05	1.5625e-05	9.27734e-06	0.000113281	1.75781e-05	1.07422e-05	-4.88281e-07	1.66016e-05	-2.92969e-06	-3.90625e-06	-4.88281e-06	-8.78906e-06	-9.32617e-05	-0.000329102
-4.54102e-05	-5.37109e-06	-4.88281e-06	-3.90625e-06	-5.85937e-05	-4.88281e-06	2.92969e-06	-1.2207e-06	-7.32422e-06	-4.39453e-05	-0.00015918	-1.53809e-05	-0.000329102	-0.000223633	1.5625e-05	-1.46484e-05	1.5625e-05	3.51562e-05	1.36719e-05	9.27734e-06	1.5625e-05	3.51562e-05	1.36719e-05	9.27734e-06	4.83398e-05	2.09961e-05	3.17383e-05	1.61133e-05	1.5625e-05	1.75781e-05	1.36719e-05	1.17188e-05	1.46484e-05	1.07422e-05	1.75781e-05	1.46484e-05	8.78906e-06	-0.000166016	2.05078e-05	9.76563e-06	-3.41797e-06	2.92969e-06	5.85938e-06	-8.78906e-06	1.80664e-05	3.90625e-06	-8.25195e-05	-0.000166016
9.76563e-07	-1.95313e-06	9.76563e-07	4.88281e-07	3.41797e-05	-1.95313e-05	-1.5625e-05	-3.90625e-06	-9.76563e-06	-1.46484e-05	-0.00021582	-4.88281e-06	-0.000191406	4.58984e-05	1.75781e-05	-1.07422e-05	1.5625e-05	3.56445e-05	1.46484e-05	1.12305e-05	1.5625e-05	3.56445e-05	1.46484e-05	1.12305e-05	3.41797e-05	9.27734e-06	4.63867e-05	9.27734e-06	1.51367e-05	1.85547e-05	1.5625e-05	1.17188e-05	1.41602e-05	8.78906e-06	1.75781e-05	1.46484e-05	1.17188e-05	-6.64063e-05	2.19727e-05	1.17188e-05	1.07422e-05	0.000101562	1.85547e-05	-9.76563e-07	2.44141e-06	-1.17188e-05	-1.02539e-05	-3.61328e-05
7.17773e-05	-8.78906e-06	-4.88281e-06	-3.41797e-06	8.05664e-05	-9.76563e-06	-1.95313e-06	-4.88281e-07	-7.32422e-06	2.44141e-06	-0.000143555	6.34766e-06	0.000200195	6.83594e-05	1.75781e-05	-3.41797e-06	1.46484e-05	3.56445e-05	1.66016e-05	1.26953e-05	1.46484e-05	3.56445e-05	1.66016e-05	1.26953e-05	-4.88281e-07	-7.8125e-06	4.39453e-05	-1.2207e-05	1.75781e-05	1.75781e-05	1.5625e-05	1.36719e-05	1.41602e-05	9.76563e-06	1.46484e-05	1.66016e-05	9.76563e-06	2.83203e-05	-1.75781e-05	1.46484e-05	-6.34766e-06	8.59375e-05	-1.95313e-06	-4.88281e-06	1.41602e-05	9.76563e-07	2.19727e-05	0.00046875
8.49609e-05	-2.44141e-06	1.46484e-06	-4.88281e-07	4.15039e-05	-1.95313e-05	-1.36719e-05	-2.92969e-06	-7.32422e-06	9.76563e-06	-9.76563e-07	5.61523e-06	0.00019043	1.5625e-05	1.66016e-05	-1.46484e-06	1.66016e-05	3.61328e-05	1.66016e-05	1.17188e-05	1.66016e-05	3.61328e-05	1.66016e-05	1.17188e-05	-5.41992e-05	-4.78516e-05	-2.44141e-05	-4.63867e-05	4.88281e-06	1.85547e-05	1.66016e-05	1.5625e-05	1.36719e-05	9.76563e-06	1.75781e-05	1.75781e-05	9.76563e-06	3.32031e-05	-3.61328e-05	1.75781e-05	1.07422e-05	-5.76172e-05	1.17188e-05	0	-1.31836e-05	-1.36719e-05	1.12305e-05	0.000294922
1.9043e-05	-5.37109e-06	-5.85938e-06	-3.90625e-06	-2.44141e-06	-4.88281e-06	0	-1.70898e-06	-7.32422e-06	-4.88281e-06	-2.44141e-05	2.19727e-06	2.24609e-05	-2.83203e-05	1.75781e-05	9.76563e-07	1.66016e-05	3.4668e-05	1.95313e-05	1.26953e-05	1.66016e-05	3.4668e-05	1.95313e-05	1.26953e-05	9.08203e-05	3.36914e-05	7.56836e-05	3.90625e-05	-4.44336e-05	1.66016e-05	1.46484e-05	1.66016e-05	1.12305e-05	1.17188e-05	1.46484e-05	1.66016e-05	7.8125e-06	8.30078e-05	-1.2207e-05	1.85547e-05	-4.88281e-07	-0.000191406	2.53906e-05	-5.85938e-06	0	-9.76563e-07	1.95313e-05	-5.95703e-05
3.27148e-05	9.76563e-07	-1.46484e-06	-1.46484e-06	-9.76563e-05	-4.88281e-06	-1.95313e-06	-2.44141e-07	-7.32422e-06	-2.44141e-06	-5.27344e-05	1.95313e-06	0.000259766	4.98047e-05	1.26953e-05	4.88281e-07	1.75781e-05	3.17383e-05	1.85547e-05	1.12305e-05	1.75781e-05	3.17383e-05	1.85547e-05	1.12305e-05	7.22656e-05	2.49023e-05	6.10352e-05	2.92969e-05	-6.98242e-05	1.75781e-05	1.17188e-05	1.66016e-05	1.2207e-05	1.17188e-05	1.07422e-05	1.66016e-05	7.32422e-06	-2.05078e-05	2.44141e-06	1.85547e-05	8.30078e-06	-0.000167969	-1.17188e-05	-2.92969e-06	-1.07422e-05	-1.5625e-05	-4.88281e-07	-0.000145508
0.000118164	-7.32422e-06	-4.39453e-06	-4.39453e-06	-7.08008e-05	0	3.90625e-06	9.76563e-07	-9.76563e-06	-9.76563e-06	0	-4.88281e-07	0.000415039	8.10547e-05	1.07422e-05	-1.36719e-05	1.46484e-05	2.88086e-05	1.66016e-05	1.02539e-05	1.46484e-05	2.88086e-05	1.66016e-05	1.02539e-05	3.71094e-05	2.29492e-05	6.5918e-05	2.05078e-05	-2.68555e-05	1.75781e-05	1.17188e-05	1.95313e-05	1.17188e-05	1.36719e-05	1.5625e-05	1.5625e-05	5.85938e-06	-3.22266e-05	7.8125e-06	1.85547e-05	-3.90625e-06	5.85937e-05	-4.49219e-05	-7.8125e-06	4.39453e-06	-1.95313e-06	5.37109e-06	1.26953e-05
[truncated: 81,765 more rows]

## Sheet: Figure 5-source data
Figure 5B
		Cycle duration (s)							Stance duration (s)							Swing duration (s)							Phasing duration
		0.4 m/s	0.5 m/s	0.6 m/s	0.7 m/s	0.8 m/s	0.9 m/s	1.0 m/s	0.4 m/s	0.5 m/s	0.6 m/s	0.7 m/s	0.8 m/s	0.9 m/s	1.0 m/s	0.4 m/s	0.5 m/s	0.6 m/s	0.7 m/s	0.8 m/s	0.9 m/s	1.0 m/s	0.4 m/s	0.5 m/s	0.6 m/s	0.7 m/s	0.8 m/s	0.9 m/s	1.0 m/s
[truncated: 94,127 more rows]

## Sheet: Figure 6-source data
Figure 6
		VL-BFA duration (s)							SRT duration (s)							VL-BFA amplitude (% of max)							SRT amplitude (% of max)
[truncated: 13 more rows]

## Sheet: Figure 7-source data
Figure 7B
[truncated: 96,171 more rows]
